# Supplementary material for: Postnatal lymph node expansion of stromal progenitors towards reticular and CD34+ stromal cell subsets is determined by distinct transcriptional programs
Source: bioRxiv preprint, doi:10.1101/2021.06.06.447189, version 1 (2021-06-07)
Supplement: Supplementary Table 2 [file 447189_file04.xlsx]

## Sheet: Sheet1
Supplementary Table 2: Accessible chromatin loci in non-endothelial SC. CD45-CD24-CD31-Pdpn+ SCs were isolated from mLNs and pLNs of GF or SPF mice ATAC-seq analysis was performed. DARs were identified in colonization- (SPF vs. GF) and location-dependent (mLN vs. pLN) pairwise comparisons.
seqnames	start	end	width	log2FC_mLN_SPF_GF	padj_mLN_SPF_GF	log2FC_pLN_SPF_GF	padj_pLN_SPF_GF	log2FC_SPF_mLN_pLN	padj_SPF_mLN_pLN	log2FC_GF_mLN_pLN	padj_GF_mLN_pLN	ATAC_RPKM_mLNGF1	ATAC_RPKM_mLNGF2	ATAC_RPKM_mLNGF3	ATAC_RPKM_mLNSPF1	ATAC_RPKM_mLNSPF2	ATAC_RPKM_mLNSPF3	ATAC_RPKM_mLNSPF4	ATAC_RPKM_pLNGF1	ATAC_RPKM_pLNGF2	ATAC_RPKM_pLNSPF1	ATAC_RPKM_pLNSPF2	ATAC_RPKM_pLNSPF3	nearest_feature	orientation_to_feature	shortestDistance_to_Gene	nearest_GeneSymbol
chr1	3119662	3120555	894	-0.148452	0.97301	-0.20105	0.986975	0.628135	0.0391884	0.575538	0.13335	42.2097	34.7698	37.1821	23.9358	34.1804	39.0242	40.5487	33.793	17.4937	21.2453	19.486	26.6891	ENSMUSG00000102693	upstream	22921	NA
chr1	3121441	3121583	143	-0.440789	0.950484	-0.0859516	0.996879	0.882365	0.201806	1.2372	0.114009	42.4429	22.8241	33.9256	13.6037	28.32	24.6434	30.0198	16.9534	11.0369	17.3534	8.17097	13.714	ENSMUSG00000102693	upstream	21893	NA
chr1	3514719	3515151	433	0.881901	0.758906	0.07799	0.996879	-0.0551723	0.947109	-0.859083	0.227242	13.4075	7.53774	10.3741	9.88387	14.8795	25.2296	26.9885	21.5343	15.9054	11.0212	15.455	35.4779	ENSMUSG00000089699	upstream	21659	NA
chr1	3670692	3672162	1471	0.302873	0.931075	0.252538	0.9853	1.63764	3.04381e-07	1.5873	5.63647e-05	30.4965	20.3917	41.0418	28.3005	26.5296	56.2978	40.8563	12.6776	7.80314	11.4195	9.45966	16.2203	ENSMUSG00000103161	upstream	4566	NA
chr1	3900423	3900704	282	-0.0933282	0.991241	-0.162584	0.995158	-0.246418	0.675049	-0.315674	0.650701	35.5589	19.2898	24.2122	15.1763	37.8604	21.244	21.9885	35.7103	29.0013	23.3532	34.2775	28.9761	ENSMUSG00000088333	upstream	46267	Gm27396
chr1	3903436	3904158	723	0.339396	0.87618	-0.137864	0.990735	0.123255	0.754643	-0.354006	0.379001	18.9792	18.9171	24.852	25.2919	29.5343	28.27	23.0904	30.1784	23.6157	21.9137	28.7962	21.6996	ENSMUSG00000088333	upstream	49280	Gm27396
chr1	4412352	4412777	426	0.249222	0.967544	-0.00248857	0.999855	-1.21815	0.000720592	-1.46986	0.000590857	16.1056	8.39127	10.1228	10.9596	14.2597	15.7174	12.8763	36.7721	25.5974	32.7107	27.6777	32.9919	ENSMUSG00000104123	downstream	20792	NA
chr1	4571426	4572134	709	-0.387032	0.857177	-0.216038	0.983547	-0.261433	0.47747	-0.0904399	0.870353	26.4256	21.0443	30.1579	14.2676	22.5881	24.3549	18.5007	29.9852	25.0939	23.9619	21.7239	25.8161	ENSMUSG00000025902	upstream	3849	Sox17
chr1	4622182	4622947	766	0.021205	0.996169	-0.510058	0.843785	-0.255412	0.499737	-0.786675	0.0287279	29.9712	24.5508	36.8274	20.0628	38.2098	27.6032	37.3615	63.0551	42.145	37.7538	41.4629	30.2955	ENSMUSG00000103003	upstream	16673	NA
chr1	4785327	4786213	887	0.0709263	0.989375	-0.0688478	0.996739	0.156863	0.647188	0.0170885	0.975455	46.4103	36.9716	64.62	47.8107	42.9589	56.4158	60.7654	54.4534	43.1896	49.6049	50.8958	37.5859	ENSMUSG00000103265	downstream	19056	Gm2053
chr1	4807553	4808288	736	0.0252808	0.995667	-0.120887	0.990735	-0.0772388	0.830539	-0.223406	0.551737	67.4052	52.7924	76.657	48.3688	70.5307	68.9479	79.3889	78.5476	74.4693	76.1215	77.3578	55.5112	ENSMUSG00000103265	upstream	1654	Gm2053
chr1	4857334	4858432	1099	-0.0535846	0.98866	-0.136883	0.983547	-0.227452	0.280684	-0.31075	0.206689	100.847	84.9936	94.9901	72.0426	95.4738	88.5009	104.38	116.576	115.28	117.416	98.297	99.9286	ENSMUSG00000033845	upstream	1372	Mrpl15
chr1	5018830	5019724	895	-0.0887919	0.982364	-0.323421	0.937132	0.373693	0.146262	0.139064	0.726416	35.3811	36.6411	31.5193	30.647	27.5606	36.2244	36.2399	33.9636	28.8564	21.5415	27.1787	27.0245	ENSMUSG00000102653	upstream	7897	NA
chr1	5082801	5083810	1010	-0.33722	0.821303	-0.189671	0.978918	-0.26754	0.322784	-0.119992	0.763739	49.3803	40.7788	45.009	32.7431	39.3676	30.3553	39.1975	56.1308	41.7655	51.4073	40.3856	35.2739	ENSMUSG00000085623	downstream	35758	Gm16041
chr1	6214317	6215599	1283	0.0662017	0.983781	-0.0817535	0.992597	-0.118467	0.616001	-0.266422	0.284661	53.2705	44.8213	58.1194	52.31	58.6818	51.9124	54.4643	65.554	59.6064	64.8689	57.2923	54.2627	ENSMUSG00000025907	upstream	60822	Rb1cc1
chr1	6279761	6280420	660	-0.585646	0.822094	-0.224619	0.992117	1.73307	4.4531e-05	2.0941	2.02215e-05	25.5888	13.1872	27.2242	11.2004	13.6666	19.7558	14.454	4.5209	5.65225	4.04912	3.54075	6.43795	ENSMUSG00000025907	inside	3340	Rb1cc1
chr1	6287816	6288293	478	-0.365906	0.955077	0.260866	0.993929	2.13431	5.66745e-05	2.76108	2.23674e-05	24.8427	21.1346	23.3058	11.8022	23.4914	22.1172	14.4691	3.51127	3.30185	3.79378	1.11112	9.57301	ENSMUSG00000090031	upstream	2299	NA
chr1	6406453	6406750	298	0.46402	0.936444	-0.307249	0.989573	0.22833	0.760849	-0.54294	0.496468	11.5117	13.0387	9.0443	11.7503	23.4733	17.7383	8.80335	19.3997	13.4814	14.4126	14.2581	9.87131	ENSMUSG00000087247	upstream	22692	Alkal1
chr1	7054909	7055392	484	0.525862	0.822094	0.0968944	0.996531	0.00856302	0.988411	-0.420404	0.427506	13.0852	14.1292	17.077	17.2829	21.2985	31.3083	17.2462	20.8064	18.9726	23.0721	19.0937	21.6099	ENSMUSG00000102534	upstream	13049	NA
chr1	7088449	7089288	840	0.131166	0.969197	-0.173847	0.983547	0.0466435	0.896389	-0.258369	0.450599	211.107	187.43	270.162	167.437	241.715	255.91	312.309	289.499	243.916	250.085	250.761	207.005	ENSMUSG00000102213	downstream	4305	NA
chr1	7204871	7205345	475	0.318473	0.965906	-0.109093	0.996879	0.0361795	0.96424	-0.391386	0.616172	9.99982	7.19844	7.56547	12.6958	10.4635	9.64464	7.53128	13.7412	7.85365	7.63549	10.0632	13.074	ENSMUSG00000098201	downstream	1078	NA
chr1	7381368	7381684	317	-0.501582	0.866532	-0.90725	0.7162	1.21463	0.00424876	0.808961	0.122808	33.2977	29.4172	51.0133	30.0697	19.1629	31.1268	27.8364	26.4729	17.1995	12.3444	8.37718	15.4661	ENSMUSG00000102768	upstream	3991	Gm19002
chr1	7397376	7398522	1147	0.165534	0.943006	-0.310831	0.906015	-0.0724127	0.815667	-0.548778	0.029608	121.014	112.06	128.925	100.913	149.254	136.413	154.905	200.957	152.237	153.109	156.417	115.694	ENSMUSG00000102768	downstream	10690	Gm19002
chr1	7709296	7709464	169	0.12433	0.991481	-0.870983	0.895112	-0.194418	0.831852	-1.18973	0.11424	10.9301	11.9555	23.3903	11.5108	20.6954	12.5113	22.579	49.6564	22.0739	15.2484	25.1414	17.4062	ENSMUSG00000103903	upstream	24841	Rps2-ps2
chr1	8872780	8873245	466	0.590006	0.826805	-0.372527	0.974375	-0.457768	0.307694	-1.4203	0.00144429	6.7953	13.0073	10.0251	12.5236	18.566	15.8807	14.3299	30.014	24.6318	20.0718	16.868	28.0558	ENSMUSG00000084353	upstream	10394	NA
chr1	8960008	8960167	160	0.86971	NA	-0.579778	0.980014	0.157246	0.891876	-1.29224	0.199891	0	9.71381	16.845	8.5108	19.5585	19.8225	20.8679	32.6353	13.4513	16.1061	10.6223	20.4281	ENSMUSG00000104504	downstream	32682	NA
chr1	9545125	9546190	1066	0.0229387	0.995667	-0.274185	0.952959	0.0109923	0.976395	-0.286132	0.360947	115.357	94.7689	115.292	73.3603	111.035	123.968	133.116	143.277	121.137	110.575	110.607	106.395	ENSMUSG00000065625	downstream	16128	Gm24765
chr1	9547931	9548141	211	-0.112835	0.98866	-0.56907	0.892545	-0.135272	0.814961	-0.591507	0.246928	42.5216	50.0883	29.8047	25.8148	41.876	53.4446	32.7783	69.8222	53.7201	48.8527	38.2603	35.6282	ENSMUSG00000065625	downstream	18934	Gm24765
chr1	9627385	9627661	277	0.12957	0.989143	-0.166502	0.99616	1.66412	0.000563369	1.36804	0.026153	26.6742	17.3937	20.7573	24.5799	26.582	22.8997	18.9415	9.42535	7.25171	5.51299	6.90255	11.7996	ENSMUSG00000025911	inside	9212	Adhfe1
chr1	9630707	9631183	477	-0.137075	0.98981	0.904507	0.939354	2.05812	9.22667e-05	3.0997	9.19572e-06	25.448	14.6624	19.5878	14.6817	12.3492	28.0738	17.9993	0.781917	3.60956	2.80128	3.11764	8.90786	ENSMUSG00000025911	inside	12534	Adhfe1
chr1	9649261	9649674	414	-0.111354	0.98866	0.504425	0.976312	2.53825	3.9106e-10	3.15403	1.64227e-09	40.7937	31.9101	50.7791	32.4221	35.571	48.5189	36.8681	6.75678	2.77256	2.99702	7.69729	11.0529	ENSMUSG00000081441	downstream	3387	Gm6161
chr1	9699978	9701095	1118	0.138395	0.962174	0.0209959	0.996879	-0.118743	0.665803	-0.236142	0.43692	96.3012	77.1544	109.769	78.9962	111.304	102.757	122.445	118.097	104.209	114.31	118.289	104.954	ENSMUSG00000079671	inside	305	2610203C22Rik
chr1	9747649	9748834	1186	0.0464892	0.990604	-0.0892257	0.993367	-0.215079	0.378668	-0.350793	0.201959	99.9022	104.575	115.292	76.7633	117.029	115.882	131.512	151.108	121.099	124.093	130.315	129.252	ENSMUSG00000025912	inside	10009	Mybl1
chr1	9772829	9773210	382	-0.134087	0.98248	0.21774	0.988875	-0.141502	0.782356	0.210325	0.7272	26.2503	24.0048	33.8664	20.8792	27.9493	23.9854	29.3431	22.4566	25.9166	24.9852	36.4271	21.3907	ENSMUSG00000025912	upstream	2395	Mybl1
chr1	9797798	9798660	863	0.155933	0.952311	0.173642	0.978771	-0.0730562	0.80997	-0.0553474	0.89123	34.5526	29.7155	32.0634	36.7425	35.4082	35.1175	35.0965	31.7655	34.5816	37.6024	38.1564	36.3587	ENSMUSG00000097893	upstream	19213	NA
chr1	9804592	9804830	239	-0.170068	0.985118	-0.192297	0.995219	1.458	0.00761472	1.43577	0.0313095	33.1235	21.4598	20.2986	17.0928	23.1063	25.0661	22.951	13.2648	5.40302	5.99019	10.6667	6.83786	ENSMUSG00000097893	upstream	13043	NA
chr1	9847891	9848520	630	-0.236466	0.963353	0.440722	0.956385	-0.14164	0.780877	0.535548	0.275409	16.3357	14.0619	15.6864	15.1303	11.3954	10.6279	14.3851	8.88034	12.0706	14.6953	14.163	14.0079	ENSMUSG00000025915	upstream	19812	Sgk3
chr1	9854793	9855093	301	-0.926172	0.744977	-1.14908	0.643419	-0.218758	0.786154	-0.441667	0.565437	22.794	17.5559	11.3419	7.10916	10.3966	11.7076	7.13095	27.8801	18.5905	7.92721	12.7044	10.8588	ENSMUSG00000025915	upstream	13239	Sgk3
chr1	9943706	9944472	767	-0.306274	0.774115	-0.372747	0.757781	-0.170364	0.468639	-0.236837	0.378921	79.4749	76.1907	82.9292	51.4865	66.96	71.2152	68.7176	94.824	92.598	73.4182	76.724	65.6257	ENSMUSG00000046101	upstream	34391	Mcmdc2
chr1	9967282	9968359	1078	0.0885702	0.98866	0.233103	0.983547	-0.335311	0.353213	-0.190778	0.71441	32.3124	20.3287	17.5013	24.3617	33.6399	23.21	16.8138	29.4089	23.5584	26.3842	30.6449	36.9904	ENSMUSG00000046101	upstream	10504	Mcmdc2
chr1	10004385	10004507	123	-0.431224	NA	-0.685637	0.978743	1.33938	0.0881534	1.08497	0.256705	38.6172	21.4809	32.1379	17.3972	20.9522	45.8407	9.69474	12.1292	16.3311	6.98368	6.90879	15.9439	ENSMUSG00000093178	downstream	8181	Snord87
chr1	10008876	10009326	451	-0.022472	0.997305	-0.101465	0.99616	-0.227566	0.62373	-0.30656	0.575655	22.2341	24.123	21.5138	18.1161	24.8978	33.5991	14.2777	31.4258	24.8148	28.5696	24.7303	24.6406	ENSMUSG00000093178	downstream	3362	Snord87
chr1	10037804	10038250	447	0.13682	0.965906	0.0769444	0.995158	0.00982248	0.978665	-0.0500528	0.906492	64.9379	80.3182	88.4331	72.6777	89.3633	95.3925	88.567	83.0223	79.2832	81.5648	92.4398	81.8953	ENSMUSG00000099032	overlapStart	93	Tcf24
chr1	10039506	10040239	734	-0.0351862	0.993015	-0.0532518	0.996879	-0.138315	0.638236	-0.156381	0.668072	92.3954	80.4632	106.976	69.4381	87.5258	85.4595	121.845	110.012	97.934	100.775	98.2631	101.528	ENSMUSG00000099032	upstream	1349	Tcf24
chr1	10231741	10233310	1570	0.00721474	0.998874	-0.142565	0.983547	0.11613	0.654893	-0.0336498	0.932405	40.5071	35.044	47.495	38.7826	38.9265	46.014	41.6219	42.999	40.9421	42.6761	37.3471	33.1014	ENSMUSG00000102556	downstream	33996	NA
chr1	10993252	10994047	796	0.169767	0.970331	0.357384	0.965757	0.166028	0.695229	0.353645	0.451891	20.5538	16.987	23.2501	17.5959	24.7444	30.1045	19.4747	19.4453	12.4374	21.9424	17.7482	21.352	ENSMUSG00000100648	downstream	53582	Gm28659
chr1	11033281	11033850	570	0.138916	0.979462	0.511606	0.937132	0.877442	0.0105491	1.25013	0.00302453	24.5366	17.4508	22.6964	19.112	26.4817	30.2941	19.2466	9.48795	8.55847	14.5677	12.2995	10.895	ENSMUSG00000048960	upstream	29839	Prex2
chr1	11329393	11329730	338	-0.354664	0.943006	-0.27854	0.989573	0.651032	0.211021	0.727156	0.237252	32.0096	15.6341	26.5799	16.1151	23.4185	19.8095	16.9342	18.7591	11.0369	9.03608	13.8278	14.5052	ENSMUSG00000101827	upstream	34995	NA
chr1	11414226	11414401	176	-0.95179	NA	-0.12806	0.996879	0.169988	0.888998	0.993718	0.350661	13.4941	9.71381	37.7736	4.4212	11.505	12.0136	14.9057	11.6555	8.96751	10.3036	6.03538	12.9997	ENSMUSG00000103494	downstream	19749	NA
chr1	11759523	11759901	379	0.00402159	0.999671	-0.420078	0.983547	-0.955882	0.157167	-1.37998	0.063962	6.96264	6.97139	2.84454	5.64606	7.28549	3.71926	5.0341	13.2854	15.5216	15.8653	7.84758	7.76161	ENSMUSG00000103561	upstream	14530	NA
chr1	11904625	11905452	828	-0.125734	0.985118	0.0434019	0.996879	-0.606623	0.129973	-0.437487	0.418426	15.935	17.8321	6.07614	13.3917	13.3391	11.4913	10.0811	17.1172	18.7148	17.2905	19.6281	18.5531	ENSMUSG00000103561	downstream	128051	NA
chr1	12117172	12117718	547	0.617926	0.863913	-0.933402	0.774785	0.626835	0.253072	-0.924493	0.13474	7.23631	15.3432	8.86903	7.82398	14.4706	16.106	27.4678	23.524	17.0497	8.20082	10.6805	13.7432	ENSMUSG00000101610	upstream	73466	NA
chr1	12278919	12279490	572	-0.24157	0.967337	0.150399	0.995158	-0.456612	0.315704	-0.0646429	0.935187	17.5308	18.4766	8.4814	12.5834	13.1946	10.4734	13.3421	12.389	18.3113	17.5202	16.3419	17.7139	ENSMUSG00000101610	downstream	86863	NA
chr1	12285497	12285799	303	-0.531212	0.902466	-0.467401	0.974375	-0.324645	0.619615	-0.260834	0.750104	25.2562	23.5953	13.6391	12.8404	14.5806	5.81519	22.8258	24.0033	25.5707	19.2147	21.0342	11.8658	ENSMUSG00000101610	downstream	93441	NA
chr1	12291843	12292076	234	-0.0818786	0.993553	-0.852588	0.861379	0.359227	0.615054	-0.411483	0.615914	18.0434	13.2838	16.893	13.3014	13.3733	18.0718	16.3071	25.5025	17.1686	13.46	7.71703	15.3647	ENSMUSG00000101610	downstream	99787	NA
chr1	12398356	12398490	135	-0.452282	NA	0.201879	0.995219	-0.150982	0.864866	0.503179	0.573413	27.3658	23.0253	29.2812	14.4098	20.4533	15.6622	26.499	19.3394	18.0679	17.6747	25.1787	21.79	ENSMUSG00000118923	upstream	46670	NA
chr1	12405899	12406255	357	-0.148544	0.980806	-0.0578619	0.996879	0.451047	0.308862	0.541728	0.308956	39.1761	39.6171	40.7677	33.7844	51.0474	41.4589	17.3691	28.7305	26.1238	23.2594	33.3247	21.0576	ENSMUSG00000118923	upstream	38905	NA
chr1	12509864	12510806	943	0.0974396	0.990105	-0.354903	0.974375	-1.08752	0.00327299	-1.53987	0.000258358	6.71603	6.75743	8.19326	4.95099	7.02745	5.23182	13.6569	23.9289	18.2584	16.5989	17.0091	15.5973	ENSMUSG00000098555	downstream	13534	Mir6341
chr1	12620327	12620759	433	-0.219259	0.97802	0.44521	0.983677	2.33788	5.44657e-06	3.00234	2.76786e-06	34.7376	18.3059	45.6462	34.5936	23.382	34.182	20.9299	6.4603	1.98818	9.91908	3.67977	1.5097	ENSMUSG00000097628	upstream	15042	NA
chr1	12657534	12657747	214	0.328034	0.976471	-0.672633	0.978743	0.853925	0.321108	-0.146742	0.920757	24.6621	12.3465	8.39626	27.2709	12.9028	24.701	10.03	17.4287	15.4208	4.90598	4.46731	25.9647	ENSMUSG00000097628	downstream	20927	NA
chr1	12691907	12693741	1835	-0.0151951	0.995737	-0.0951025	0.992342	-0.172422	0.50981	-0.252329	0.403808	29.4803	32.9476	24.1858	25.1249	25.7812	35.144	29.1128	31.5047	37.2188	34.3285	31.259	30.8147	ENSMUSG00000098163	upstream	32350	NA
chr1	12715407	12715796	390	-0.143267	0.970331	-0.15352	0.989573	0.506413	0.0677519	0.49616	0.151479	121.793	107.998	127.619	89.2855	82.6	140.057	122.914	86.071	82.777	73.9076	58.2863	99.7311	ENSMUSG00000098163	upstream	10295	NA
chr1	12718103	12719143	1041	0.132712	0.961436	-0.12537	0.986975	-0.0120817	0.96967	-0.270163	0.318488	62.6123	62.4073	58.8577	62.0411	68.7869	74.1361	64.3764	81.1515	66.8472	78.2069	68.5702	54.318	ENSMUSG00000098163	upstream	6948	NA
chr1	12760788	12761305	518	-0.333	0.902466	-0.298667	0.974375	-0.592751	0.0603554	-0.558418	0.139472	28.528	22.503	20.4655	16.8996	21.322	19.729	17.035	36.3614	33.2387	30.7704	28.2987	24.6084	ENSMUSG00000016918	upstream	1196	Sulf1
chr1	12764626	12765900	1275	0.279306	0.902466	-0.134534	0.990735	0.132956	0.70798	-0.280884	0.468226	14.4878	19.7476	21.7025	19.6821	26.2765	19.6239	25.2519	23.9874	21.719	20.7356	17.2456	25.3789	ENSMUSG00000016918	inside	2125	Sulf1
chr1	12771091	12771986	896	0.119072	0.979462	0.349107	0.973622	1.32314	1.95975e-06	1.55318	5.26489e-06	29.4514	25.4988	34.0911	23.4481	28.1462	47.5898	31.4084	10.8229	9.44792	12.3565	12.448	14.2267	ENSMUSG00000016918	inside	8590	Sulf1
chr1	12777031	12777231	201	-0.311984	0.958648	-0.374818	0.978918	0.392354	0.489104	0.329519	0.649415	43.3243	44.0746	69.7266	22.2599	50.3702	66.6229	33.2226	32.4729	50.6821	40.3617	23.7812	32.5224	ENSMUSG00000016918	inside	14530	Sulf1
chr1	12795113	12795368	256	-0.0533828	0.995667	0.232868	0.993367	1.90319	2.69263e-05	2.18944	0.000105272	48.4475	29.7485	46.3238	31.9155	23.7291	66.075	40.9906	11.6555	6.72563	12.3033	9.12851	10.2141	ENSMUSG00000016918	inside	32612	Sulf1
chr1	12814803	12815357	555	-0.128392	0.985782	-0.658699	0.835502	-0.462946	0.313517	-0.993253	0.0323746	18.5432	21.5629	13.2737	11.2163	28.1924	12.6991	12.032	36.2894	34.6421	26.1395	20.6703	20.0232	ENSMUSG00000016918	inside	52302	Sulf1
chr1	12850900	12851435	536	-0.282577	0.970466	-1.02962	0.708478	-0.323943	0.63757	-1.07098	0.0805435	5.90786	12.1785	9.72149	10.1622	8.92926	9.20448	2.66967	25.3984	14.4551	9.43752	11.2961	7.92733	ENSMUSG00000016918	inside	79981	Sulf1
chr1	12861920	12862253	334	-0.0111328	0.998874	0.304921	0.989596	1.90069	1.15329e-05	2.21675	6.33686e-05	29.2327	18.148	27.9741	22.1325	27.5569	26.3773	22.8494	5.58345	5.15498	5.14367	6.9967	8.80733	ENSMUSG00000016918	inside	69163	Sulf1
chr1	12864174	12864332	159	0.207754	0.974921	-0.523263	0.956385	0.523659	0.309482	-0.207358	0.787591	33.193	33.2347	31.6418	34.2573	33.5744	53.1925	32.9987	43.3964	32.4861	22.8104	32.0672	22.6123	ENSMUSG00000016918	inside	67084	Sulf1
chr1	12865181	12865567	387	-0.209359	0.966557	-0.80547	0.580849	0.609855	0.100275	0.0137436	0.983991	26.593	25.3011	34.8217	23.6254	28.5396	26.4073	21.5689	26.0215	31.143	16.0306	17.0176	16.0469	ENSMUSG00000016918	inside	65849	Sulf1
chr1	12871931	12872283	353	-0.389155	0.857107	-0.519846	0.827543	0.211095	0.593035	0.080404	0.88705	59.0562	56.3566	43.7747	34.1672	49.0185	33.9422	43.2391	44.9049	54.872	40.2864	33.7024	28.7035	ENSMUSG00000016918	inside	59133	Sulf1
chr1	12877702	12878308	607	0.106102	0.990604	-0.470103	0.974375	0.77327	0.132381	0.197065	0.817395	13.4768	8.19353	21.0169	10.8964	13.6468	12.1918	24.3598	11.9819	12.7643	9.59153	5.77487	12.3848	ENSMUSG00000016918	inside	53108	Sulf1
chr1	12973487	12973740	254	-0.738611	0.893945	-0.890294	0.934988	-0.215858	0.830318	-0.367541	0.731649	20.7783	19.5806	8.48882	1.53175	13.045	8.32442	15.962	24.9629	16.9465	9.76982	12.546	11.5813	ENSMUSG00000025938	inside	36714	Slco5a1
chr1	12991007	12991397	391	-0.0952752	0.985118	-0.400058	0.905883	-0.130397	0.736721	-0.43518	0.234932	45.8929	48.892	68.931	43.2847	59.7907	45.064	56.1154	70.5885	77.4279	61.7576	45.3687	62.695	ENSMUSG00000025938	inside	54234	Slco5a1
chr1	12992057	12992847	791	0.172379	0.958069	-0.244956	0.974375	-0.023867	0.952609	-0.441203	0.175072	80.066	73.486	88.8178	57.0563	95.6472	95.7851	116.381	122.124	97.4069	86.8766	104.208	85.9479	ENSMUSG00000025938	inside	55284	Slco5a1
chr1	13040536	13040780	245	-0.528679	0.911073	-0.12218	0.996879	-0.878239	0.112967	-0.47174	0.538125	8.61663	24.7405	24.9352	8.73412	12.0216	17.2604	18.4952	32.7304	22.8397	30.3861	23.4123	21.3453	ENSMUSG00000025938	inside	22094	Slco5a1
chr1	13042315	13042671	357	-0.442173	0.90908	-0.0697899	0.996879	-1.49234	7.73453e-05	-1.11996	0.0137169	22.1751	20.8969	9.0595	14.1676	14.9533	9.87116	10.6887	36.5661	38.181	35.0227	36.8952	34.7907	ENSMUSG00000025938	inside	20203	Slco5a1
chr1	13052162	13052287	126	0.17692	NA	-0.194187	0.996739	0.561231	0.535922	0.190124	0.891153	31.4148	14.802	15.6864	12.3513	26.2972	22.3746	30.2845	13.3205	21.6359	16.6648	22.762	2.59405	ENSMUSG00000025938	inside	10587	Slco5a1
chr1	13171166	13171426	261	-0.396502	0.936444	-0.17269	0.994356	-0.548871	0.29203	-0.325059	0.644488	18.1989	18.46	24.7835	15.652	18.3375	10.8015	16.4476	32.153	19.7904	22.3067	23.605	22.5414	ENSMUSG00000042414	downstream	12255	Prdm14
chr1	13188334	13188751	418	0.31407	0.935793	-0.727035	0.777093	1.02454	0.0048326	-0.0165611	0.982595	27.146	22.681	18.4838	22.8041	24.6614	30.3503	35.3742	24.5378	21.2818	15.9834	9.91072	16.4207	ENSMUSG00000042414	inside	4653	Prdm14
chr1	13366540	13366931	392	-0.164193	0.97802	-0.869521	0.583737	0.216399	0.673716	-0.48893	0.342638	36.3514	26.5643	20.6265	22.3315	27.7059	15.2827	31.6365	30.4469	46.4847	18.7479	20.8652	25.014	ENSMUSG00000104170	downstream	329	NA
chr1	13372361	13374742	2382	0.281904	0.732474	-0.00738494	0.999148	0.14056	0.468505	-0.148729	0.544753	54.6158	48.6751	57.8567	59.6175	71.2518	65.9826	64.1782	64.4328	54.6935	61.265	59.845	56.1216	ENSMUSG00000104170	upstream	3230	NA
chr1	13426069	13427289	1221	0.080472	0.985118	-0.137692	0.989596	0.201548	0.51383	-0.0166167	0.974686	23.5572	22.5303	26.6356	19.756	24.7249	33.1908	25.9781	25.3537	23.7371	22.747	24.794	18.4706	ENSMUSG00000102664	overlapStart	335	NA
chr1	13531555	13532103	549	-0.119352	0.989375	-0.241148	0.989596	0.0285226	0.968326	-0.0932737	0.913178	12.4972	13.8718	19.9644	7.79548	19.4474	19.2568	11.2946	15.2858	17.7717	14.2557	10.4481	18.456	ENSMUSG00000101171	upstream	53676	Gm7593
chr1	13589099	13590486	1388	0.185056	0.913141	0.185576	0.974375	-0.0276543	0.927162	-0.0271344	0.943538	42.3964	38.0714	44.92	41.4853	47.4789	50.5242	50.8597	48.0997	37.2139	48.4782	47.9838	48.7449	ENSMUSG00000025935	downstream	44436	Tram1
chr1	13604520	13604831	312	0.116855	0.991241	1.85341	0.545117	2.15891	8.69013e-05	3.89546	9.53396e-07	39.7518	20.9221	47.7995	37.4101	26.55	75.6757	19.1098	4.18401	0.919745	7.64773	5.10686	15.7139	ENSMUSG00000025935	downstream	30091	Tram1
chr1	13659641	13660798	1158	0.00392762	0.999513	-0.0937533	0.993367	0.184406	0.49691	0.0867253	0.828304	57.4256	51.807	80.2198	50.901	60.0883	72.1234	71.2589	59.9078	59.1019	52.8319	57.606	57.0153	ENSMUSG00000025935	overlapStart	493	Tram1
chr1	13789316	13789449	134	0.15447	NA	6.68843e-05	0.999991	-0.0386841	0.97	-0.193087	0.87223	7.87714	22.0373	26.8179	23.2278	27.4746	10.5194	23.1372	27.8339	17.132	22.7925	25.3666	17.0742	ENSMUSG00000067813	downstream	17369	Xkr9
chr1	13998008	13998547	540	-0.591948	0.87618	-0.991904	0.691888	-0.557845	0.332072	-0.957802	0.0964947	14.6602	11.5127	7.3203	3.9627	8.52223	4.56815	11.9245	22.4475	20.4592	10.4281	8.85188	13.9214	ENSMUSG00000102166	upstream	78665	NA
chr1	14218753	14219068	316	-0.296575	0.968647	-0.0150629	0.999855	-1.55906	0.000417313	-1.27755	0.016192	17.5366	11.8041	8.52911	10.4654	13.9808	8.92153	6.03774	28.9173	30.8755	32.0159	22.858	35.1674	ENSMUSG00000104209	upstream	35710	NA
chr1	14309721	14309941	221	-0.505472	0.931075	-0.15254	0.996531	-0.0311883	0.973864	0.321744	0.731932	13.1345	22.5044	31.7082	7.92214	22.4894	12.7566	20.5037	16.8767	19.477	12.0924	17.7839	20.7054	ENSMUSG00000102588	downstream	15835	NA
chr1	14357020	14357349	330	0.176631	0.980806	-0.492401	0.95663	-0.101158	0.880348	-0.77019	0.165579	15.1933	10.8324	17.4235	12.3793	15.0611	22.4255	16.6221	26.5603	22.609	15.3288	19.3132	17.8282	ENSMUSG00000025932	inside	23110	Eya1
chr1	14747419	14747589	171	-0.641404	NA	-1.16307	0.895112	-0.413796	0.720164	-0.935458	0.401362	18.5182	19.0868	3.15228	1.13762	11.8414	14.4257	8.36809	27.2642	24.3329	9.48855	8.0754	19.114	ENSMUSG00000054493	upstream	75572	NA
chr1	14754958	14756984	2027	0.161097	0.944645	-0.104054	0.990735	-0.254761	0.275067	-0.519912	0.0354751	20.1786	22.3892	23.3132	24.7604	23.8841	28.6858	21.5312	34.7766	28.4554	29.4288	33.3813	24.5097	ENSMUSG00000054493	upstream	66177	NA
chr1	14761912	14762584	673	-0.0802708	0.991241	-0.230269	0.987362	-0.789911	0.0401117	-0.93991	0.0371569	18.8209	15.4728	13.0822	10.695	23.7964	6.80714	16.6554	27.7098	32.4056	24.8182	23.2017	29.6253	ENSMUSG00000054493	upstream	60577	NA
chr1	14772767	14773591	825	0.100555	0.983606	-0.350652	0.930163	-0.646848	0.0122429	-1.09805	0.00011659	20.471	17.3318	17.2057	16.0342	20.0815	18.3675	23.7045	37.9756	40.0005	33.2028	25.8797	33.2793	ENSMUSG00000054493	upstream	49570	NA
chr1	14774616	14775542	927	0.0203733	0.995667	-0.0474477	0.996879	-0.137673	0.710818	-0.205494	0.636513	17.9339	18.6103	23.841	16.1586	20.8505	22.8091	22.6399	26.9572	19.8117	21.8275	21.8862	24.3286	ENSMUSG00000054493	upstream	47619	NA
chr1	14781481	14781701	221	0.179281	0.982111	-0.59883	0.956385	1.03606	0.0361668	0.25795	0.75273	25.075	23.2077	25.204	16.7245	27.4871	39.8643	29.1369	23.6273	17.5293	15.9792	11.0548	13.3106	ENSMUSG00000054493	upstream	41460	NA
chr1	14782589	14782749	161	1.01582	0.686702	0.671722	0.959641	1.00727	0.05865	0.66317	0.440869	19.6684	12.5495	21.2045	30.2069	28.5839	37.21	47.4019	11.5831	10.6942	16.5989	18.4735	18.2711	ENSMUSG00000054493	upstream	40412	NA
chr1	14795047	14795702	656	-0.127894	0.98248	0.155748	0.991383	-0.912048	0.00498917	-0.628406	0.148741	35.3991	38.8552	19.9949	28.1716	40.4078	18.2646	26.5394	45.769	51.1804	57.3244	66.0653	36.8703	ENSMUSG00000054493	upstream	27459	NA
chr1	14800606	14801252	647	0.214692	0.97301	0.25379	0.989573	-0.0456883	0.946184	-0.00658965	0.994503	17.9458	15.1337	8.05366	12.6281	21.3385	18.5187	10.6897	17.294	10.2011	17.2595	18.552	12.1243	ENSMUSG00000054493	upstream	21909	NA
chr1	14858532	14858668	137	-0.0113841	NA	-0.960459	0.939354	-0.214165	0.854989	-1.16324	0.243491	7.70465	14.748	15.7384	2.83989	8.0619	20.5781	22.6305	24.502	33.5136	16.0234	9.30417	21.4719	ENSMUSG00000103492	upstream	201	NA
chr1	15286346	15287425	1080	-0.189483	0.968077	-0.483841	0.899864	0.263709	0.516733	-0.0306498	0.963332	44.4694	28.9256	36.2687	17.1117	30.5096	38.503	42.3983	37.4701	36.9329	25.0098	20.556	35.4087	ENSMUSG00000073737	downstream	51601	Gm10566
chr1	15471431	15471910	480	-0.517879	0.830362	-0.472068	0.93272	-0.778082	0.0352191	-0.732271	0.0890371	23.6396	19.7514	14.2247	12.1583	10.738	16.8858	14.4088	34.9664	28.3971	20.6795	21.6871	27.2375	ENSMUSG00000102937	downstream	35373	NA
chr1	15576503	15576994	492	-0.11021	0.987696	-0.0281417	0.997227	-0.791156	0.0239715	-0.709088	0.106262	30.0356	26.5353	14.2429	17.3972	27.3127	21.4878	20.359	47.7589	29.1626	36.2763	40.1573	35.8738	ENSMUSG00000104149	upstream	49479	NA
chr1	15636697	15638765	2069	0.269397	0.901237	0.092438	0.995158	-0.659379	0.00573563	-0.836338	0.00319789	22.83	23.8127	14.8503	17.3001	30.5169	26.5705	24.4369	38.3971	34.7432	40.9176	40.8667	34.7545	ENSMUSG00000104149	downstream	8136	NA
chr1	15644643	15644962	320	0.295701	0.97077	-0.471088	0.979376	1.03503	0.0878133	0.268236	0.788956	14.0188	10.1995	10.6685	8.5108	17.2575	11.0125	19.3774	11.6555	7.62239	4.77218	8.29864	8.17125	ENSMUSG00000104149	downstream	16082	NA
chr1	15651902	15652589	688	-0.628173	0.855194	-0.240421	0.990735	-0.971538	0.0410004	-0.583786	0.359271	14.1914	9.48791	9.1407	4.52401	8.56187	10.2442	5.19965	18.974	13.5555	9.98829	10.6531	22.3284	ENSMUSG00000104149	downstream	23341	NA
chr1	15683730	15684102	373	-0.281005	0.970331	-0.466608	0.978771	0.39537	0.554899	0.209767	0.819644	18.3941	17.9172	13.488	7.82303	19.247	13.2268	14.0665	18.4987	10.386	12.7941	11.9607	4.38137	ENSMUSG00000104149	downstream	55169	NA
chr1	15805297	15806410	1114	-0.0478054	0.991241	-0.154461	0.986975	-0.142525	0.645165	-0.249181	0.4759	86.4612	73.3855	84.8399	51.1652	90.3876	83.1968	90.9861	102.451	91.3173	99.4704	88.9638	71.2967	ENSMUSG00000077377	upstream	21646	Gm25168
chr1	15892357	15892840	484	0.15418	0.987317	-0.290085	0.989573	0.213073	0.765636	-0.231191	0.793343	20.7182	14.7714	12.6221	8.84239	11.4099	24.7554	27.1012	20.8064	16.601	13.8038	8.9982	24.9865	ENSMUSG00000025925	inside	16487	Terf1
chr1	16007985	16008152	168	0.17344	0.98866	-0.167118	0.99616	-0.405769	0.592511	-0.746328	0.371064	32.9855	9.25125	17.1124	8.10553	27.3929	20.9762	29.8113	37.7415	26.4755	26.7015	29.717	29.183	ENSMUSG00000032719	upstream	45039	Sbspon
chr1	16059504	16060141	638	0.0728762	0.992375	-0.312997	0.978918	-0.10829	0.856162	-0.494163	0.373667	15.7172	9.01344	13.5182	9.45221	11.2525	20.9894	12.7095	16.9534	18.441	14.2118	11.9875	17.4183	ENSMUSG00000100652	upstream	63418	Gm7634
chr1	16092963	16093550	588	-0.0737408	0.990025	0.0622572	0.996879	-0.505858	0.0912677	-0.36986	0.357932	29.6197	22.7316	28.4188	19.8503	22.5404	31.1646	29.6085	34.2528	34.894	38.6319	30.53	40.0224	ENSMUSG00000100652	upstream	30009	Gm7634
chr1	16104154	16106240	2087	0.0468236	0.98866	-0.0110331	0.998184	-0.0930072	0.676248	-0.150864	0.558052	65.244	65.7579	73.1806	65.9938	74.4435	67.3731	73.3642	79.7061	71.5682	80.169	81.5883	62.0185	ENSMUSG00000100652	upstream	17319	Gm7634
chr1	16110217	16110392	176	-0.42995	0.91025	-0.188768	0.993367	0.292251	0.610351	0.533434	0.38789	58.4743	57.3998	62.2755	26.5272	66.9382	52.0591	31.1664	41.3239	40.7614	35.2491	25.3486	51.9989	ENSMUSG00000100652	upstream	13167	Gm7634
chr1	16129626	16130249	624	-0.212452	0.967337	-0.157645	0.990887	-0.80406	0.0174452	-0.749253	0.0676002	14.3783	18.9295	13.2456	14.3405	13.57	7.34167	17.581	26.2995	26.2127	21.2607	23.832	26.1899	ENSMUSG00000100652	downstream	5515	Gm7634
chr1	16132108	16132218	111	-0.343997	0.970368	-0.865366	0.92906	0.131713	0.89532	-0.389657	0.697948	40.4147	32.2043	21.0436	12.2678	23.2173	19.0487	42.9713	50.4019	31.0227	19.7766	29.6658	14.723	ENSMUSG00000100652	downstream	7997	Gm7634
chr1	16179789	16180374	586	0.386433	0.866532	0.163308	0.990735	0.698355	0.0267932	0.47523	0.281894	35.5748	28.3789	40.474	29.5451	47.7477	57.7311	48.0237	25.7772	24.2398	25.8968	21.9333	38.4857	ENSMUSG00000025921	inside	3791	Rdh10
chr1	16227895	16228928	1034	-0.0902067	0.988479	-0.149317	0.990735	-0.548209	0.0785816	-0.60732	0.106408	29.0936	20.2919	23.9805	15.4272	26.348	18.4039	30.9069	39.3174	34.8293	26.6762	32.1544	42.6738	ENSMUSG00000104165	downstream	49493	NA
chr1	16248749	16249386	638	-0.348137	0.894675	-0.168989	0.989573	-0.921507	0.00156047	-0.74236	0.038769	30.1936	21.681	18.8692	19.8192	22.2166	14.9135	15.3262	42.3835	35.7576	38.2971	37.461	26.6398	ENSMUSG00000104165	downstream	29035	NA
chr1	16331513	16331994	482	0.113825	0.991241	-0.543442	0.973622	-0.559591	0.368995	-1.21686	0.0565988	18.6142	11.9307	3.35502	7.2647	17.1859	8.04233	14.8438	31.3391	20.242	16.8313	20.7156	14.9185	ENSMUSG00000089982	inside	6151	Gm7568
chr1	16334574	16335024	451	0.502749	0.931075	-0.25323	0.990887	-0.454427	0.493486	-1.21041	0.0704995	4.09576	16.1969	3.98404	13.3714	15.9182	7.81375	9.51847	20.6749	18.1339	18.8348	17.429	11.5956	ENSMUSG00000089982	inside	3121	Gm7568
chr1	16374394	16374500	107	-0.131186	NA	-1.3464	0.937132	-0.00220692	0.999368	-1.21742	0.404452	12.331	4.3576	6.71701	7.27225	10.3222	9.88038	0	17.4287	17.4322	7.13597	8.93461	3.05467	ENSMUSG00000089982	downstream	36249	Gm7568
chr1	16518679	16520111	1433	0.241317	0.899571	-0.0890601	0.994356	0.147536	0.609512	-0.18284	0.603499	26.149	25.3793	27.7106	24.9784	37.6382	31.9693	30.2898	34.6166	25.5321	29.106	28.0938	27.1425	ENSMUSG00000025920	inside	70225	Stau2
chr1	16607029	16607153	125	-0.482773	NA	0.523177	0.985014	-0.546589	0.579763	0.45936	0.722987	14.7775	12.4337	22.999	7.7813	8.83584	22.5536	11.4476	10.4433	13.7741	21.3794	9.34759	23.5332	ENSMUSG00000025920	upstream	16693	Stau2
chr1	16618605	16619649	1045	0.199777	0.931075	0.0719983	0.995219	-0.0768562	0.815317	-0.204634	0.555479	42.171	49.8239	51.067	40.5819	66.5859	53.2816	59.1092	56.5708	53.6849	59.0928	64.6484	48.7929	ENSMUSG00000025920	upstream	28269	Stau2
chr1	16626149	16626440	292	-0.40758	0.90908	0.0693455	0.996879	1.66353	6.05934e-05	2.14046	1.6775e-05	47.8968	33.5326	31.9978	26.6483	25.2165	32.585	29.403	6.38655	10.3188	6.8641	9.82195	11.1935	ENSMUSG00000025920	upstream	35813	Stau2
chr1	16656506	16657544	1039	0.0313499	0.992914	0.0160476	0.997107	-0.333647	0.0856968	-0.34895	0.147043	96.0041	86.1622	83.0091	74.8922	100.101	94.29	91.8155	120.436	104.538	123.461	120.536	95.0035	ENSMUSG00000102457	upstream	31240	NA
chr1	16665070	16665985	916	-0.00213223	0.999609	-0.134199	0.989573	0.13342	0.657729	0.00135324	0.997475	42.3482	34.1044	40.6045	33.5548	42.6037	37.3175	41.6578	40.3106	37.4364	40.7407	35.2529	28.5458	ENSMUSG00000102457	upstream	22799	NA
chr1	16688061	16689136	1076	0.111234	0.974768	-0.0733552	0.995219	-0.103237	0.752589	-0.287827	0.387851	26.7318	28.5998	28.7221	27.842	29.4254	27.5108	36.3499	38.9959	29.7361	34.7713	35.4404	26.1237	ENSMUSG00000102457	overlapStart	352	NA
chr1	16693991	16694561	571	0.0859518	0.991026	0.042441	0.996879	-0.868312	0.0179779	-0.911823	0.0406111	14.3265	9.52668	9.44028	8.85788	11.6058	9.87461	15.8715	19.5959	21.3587	19.3896	23.2536	20.607	ENSMUSG00000025939	upstream	4278	Ube2w
chr1	16746107	16746213	107	-0.432153	NA	0.100216	0.996879	-0.295348	0.777422	0.237021	0.859446	17.2635	13.0728	36.9436	18.1806	22.3649	16.4673	8.91554	20.9145	17.4322	18.7319	25.8111	15.2734	ENSMUSG00000025940	inside	2286	Tmem70
chr1	16750060	16750407	348	0.0391302	0.996357	0.294544	0.993049	1.54477	0.00996187	1.80018	0.015909	25.0235	10.7187	23.2345	15.652	9.52138	27.3414	28.7834	8.57412	2.8861	9.87348	5.18904	4.69612	ENSMUSG00000025779	upstream	7868	Ly96
chr1	16798401	16798589	189	0.327432	0.966557	-0.560496	0.962914	0.139983	0.856203	-0.747944	0.277618	18.1508	16.4467	21.8658	23.6733	17.5314	27.9683	26.499	43.415	20.4972	24.2396	22.481	15.5643	ENSMUSG00000100093	downstream	29840	NA
chr1	17096798	17098201	1404	0.0084328	0.998874	-0.218554	0.978743	-0.166027	0.591196	-0.393013	0.220591	63.3397	58.0061	59.6374	36.3017	65.5556	73.2912	68.2858	87.0008	71.4335	70.631	70.2098	62.8558	ENSMUSG00000042686	inside	62014	Jph1
chr1	17123417	17123684	268	0.114239	0.98866	-0.143321	0.995158	0.363079	0.447735	0.105519	0.889572	23.6314	27.8366	38.2155	23.2278	37.0908	43.3926	28.4765	26.4422	29.4456	27.4222	21.4031	28.0506	ENSMUSG00000042686	inside	44429	Jph1
chr1	17201070	17201239	170	-0.776896	NA	-0.600699	0.978771	-0.300899	0.778272	-0.124703	0.928224	18.6271	12.7994	14.7972	4.57724	6.49694	18.6565	8.41732	20.8427	12.66	7.86006	11.2471	15.3812	ENSMUSG00000100110	downstream	1890	NA
chr1	17305368	17305613	246	-0.383502	0.970046	-0.817189	0.937132	-0.845484	0.260378	-1.27917	0.104808	13.9451	9.47689	8.76488	2.37235	7.48293	15.7577	8.72527	31.0812	20.4138	15.5193	19.431	6.64329	ENSMUSG00000100272	downstream	14725	NA
chr1	17377483	17378175	693	-0.205154	0.967337	-0.610414	0.814031	-0.0495751	0.92895	-0.454835	0.336392	44.1711	38.5749	33.7062	14.3163	40.1098	40.1726	40.6088	60.5478	45.7563	37.599	36.6338	29.242	ENSMUSG00000100272	upstream	56767	NA
chr1	17395078	17395219	142	0.16339	NA	-0.20746	0.995219	0.276238	0.754837	-0.0946122	0.940567	18.5834	19.7012	21.511	17.8093	28.5195	34.7437	10.0771	30.2057	13.1355	16.1313	20.9453	18.4141	ENSMUSG00000100398	upstream	69963	NA
chr1	17449349	17449662	314	0.0080284	0.999378	-0.553987	0.883015	0.0798974	0.889184	-0.482118	0.338456	23.5311	23.7586	26.3225	24.7812	29.3121	23.5682	20.5072	36.8223	31.986	20.6693	20.9739	31.2277	ENSMUSG00000100398	upstream	15520	NA
chr1	17480492	17481410	919	-0.317143	0.931075	-0.228179	0.983677	-1.09332	0.000746748	-1.00435	0.00935749	11.7729	11.5001	12.3176	9.52554	13.821	5.36845	8.30435	23.5392	24.0435	16.8247	25.3131	18.4942	ENSMUSG00000101589	upstream	9987	Rbm6-ps1
chr1	17551509	17552071	563	-0.00445837	0.99962	-0.604198	0.943347	-1.235	0.0128209	-1.83474	0.000874868	10.3116	2.48453	9.57442	8.63822	9.80889	5.6334	4.23607	29.149	22.6816	16.9527	20.5653	12.7721	ENSMUSG00000089534	upstream	38154	Gm25166
chr1	17570040	17570781	742	0.242719	0.940885	-0.0596401	0.996879	-0.361772	0.286704	-0.664131	0.0729053	30.585	24.5071	32.449	25.9552	47.3845	24.6965	38.5699	53.7847	38.6739	38.0745	52.5387	41.8474	ENSMUSG00000089534	upstream	19444	Gm25166
chr1	17594310	17594681	372	0.244971	0.970331	-0.087427	0.996879	-0.429907	0.411672	-0.762305	0.187092	16.3154	21.3077	25.1166	14.1193	44.5355	15.157	24.3619	37.5982	33.9416	29.5054	43.1172	27.2375	ENSMUSG00000089534	downstream	3975	Gm25166
chr1	17601372	17602824	1453	0.257095	0.866532	-0.0363706	0.996879	0.466861	0.0250921	0.173395	0.601017	25.4259	25.8857	28.9368	25.5717	33.1927	36.6225	33.3198	23.4874	23.9957	22.2023	23.1014	24.5194	ENSMUSG00000089534	downstream	11037	Gm25166
chr1	18464669	18464894	226	0.0587241	0.995667	-0.148348	0.996879	-0.526873	0.506831	-0.733945	0.424222	18.6821	9.62785	5.56531	11.1899	7.33062	7.79647	18.9948	23.9298	12.6974	17.315	13.6303	18.8011	ENSMUSG00000067773	upstream	129307	Defb41
chr1	18792732	18793504	773	0.0688457	0.993006	-0.606664	0.890108	-0.536093	0.24117	-1.2116	0.00957546	18.093	15.4818	7.43824	9.56305	18.3366	11.3972	17.2775	36.1877	26.7285	18.3973	28.8574	13.5307	ENSMUSG00000101306	downstream	13172	Gm5252
chr1	20069607	20070394	788	-0.33548	0.85899	-0.780091	0.160904	-0.859739	0.00036001	-1.30435	1.05142e-06	43.5342	35.5023	32.1509	18.5152	33.4054	31.3046	34.1998	94.4269	87.7633	50.6287	49.0673	60.5585	ENSMUSG00000104095	downstream	61900	NA
chr1	20788395	20788665	271	0.264649	NA	-0.85328	0.927428	0.268363	0.76602	-0.849566	0.319454	8.76368	4.58807	11.2714	10.7675	9.50967	13.0037	6.16027	17.2036	12.1773	7.74819	7.44734	9.64871	ENSMUSG00000025929	upstream	12464	Il17a
chr1	20819955	20820587	633	-0.013125	0.99756	-0.0724348	0.995624	-0.259958	0.327681	-0.319268	0.319789	110.056	120.065	139.657	79.2882	145.112	138.622	127.346	164.686	143.48	155.152	146.497	136.833	ENSMUSG00000025929	downstream	15235	Il17a
chr1	20890047	20891391	1345	-0.202339	0.935113	-0.00751725	0.999855	-0.532403	0.0225716	-0.337582	0.296633	56.1122	49.4574	37.5391	31.0963	45.7121	51.0915	38.3004	68.3555	52.0582	62.8012	55.5201	61.2388	ENSMUSG00000041859	overlapStart	489	Mcm3
chr1	20933558	20933771	214	-0.409939	0.927288	-0.34873	0.980462	-0.151792	0.820085	-0.090583	0.918156	51.7904	36.3133	57.0946	19.9987	49.0307	29.6411	45.6921	67.1005	36.2053	27.6519	53.6077	39.7107	ENSMUSG00000088858	upstream	20668	Gm24723
chr1	20939156	20939376	221	0.468399	0.898292	-0.239319	0.989586	0.467453	0.346292	-0.240265	0.743149	20.2988	23.9109	33.3343	25.5269	40.8141	28.7023	48.5614	34.5972	27.2677	22.8892	24.9936	32.5371	ENSMUSG00000097934	downstream	19498	6720483E21Rik
chr1	20951168	20952145	978	0.121961	0.962952	-0.0446231	0.996879	-0.183733	0.394929	-0.350317	0.133029	70.9627	75.9624	77.3469	67.0322	85.6405	88.6406	85.3494	101.824	89.1983	99.8352	94.6011	81.5454	ENSMUSG00000097934	downstream	6729	6720483E21Rik
chr1	20993818	20993960	143	-0.381368	0.944978	0.620981	0.974375	1.3957	0.00848854	2.39804	0.000242155	62.7417	42.3875	50.2601	43.5318	23.1709	61.6084	33.3553	11.737	8.02686	18.6883	11.885	13.714	ENSMUSG00000077314	upstream	8054	Gm24171
chr1	20995285	20995965	681	0.0619894	0.98981	-0.368119	0.866133	-0.322519	0.209147	-0.752627	0.00410137	44.5619	48.8401	40.3686	47.4191	53.2508	43.9853	40.9742	84.3437	66.3675	65.4511	61.3003	45.5958	ENSMUSG00000077314	upstream	9521	Gm24171
chr1	21008462	21009464	1003	-0.0695164	0.982364	-0.0385676	0.996879	0.181868	0.409812	0.212816	0.427376	55.7761	51.7553	51.2348	45.7724	51.5718	48.8371	55.1643	42.9497	48.0652	44.6292	45.645	42.3634	ENSMUSG00000100929	upstream	6471	NA
chr1	21014433	21015100	668	-0.091917	0.974768	-0.108882	0.989573	-0.293694	0.161339	-0.310659	0.227242	79.4023	80.2698	77.7358	61.4467	77.1593	80.1869	79.2589	93.2436	102.885	97.8726	79.667	96.3914	ENSMUSG00000100929	upstream	835	NA
chr1	21040934	21041298	365	-0.904029	0.424328	-0.705342	0.777093	0.199289	0.702505	0.397975	0.440288	35.4255	28.5293	45.2892	20.2527	17.6515	17.3786	22.2156	28.1008	27.1237	17.2583	13.678	21.4915	ENSMUSG00000041809	inside	19084	Efhc1
chr1	21073233	21073351	119	-0.525775	0.874848	-0.547255	0.968808	1.20601	0.0114112	1.18453	0.0299423	70.9605	60.0787	61.9066	45.7724	34.0316	47.3815	52.1072	31.3424	25.32	19.2491	17.8525	21.9731	ENSMUSG00000041809	downstream	12168	Efhc1
chr1	21078526	21079779	1254	0.228116	0.913141	0.0591328	0.996879	0.183024	0.531666	0.0140404	0.977455	49.6624	45.9818	79.2369	60.3454	73.8376	62.9487	76.0736	65.8802	49.8863	60.2041	60.2267	60.2092	ENSMUSG00000041809	downstream	17461	Efhc1
chr1	21089690	21090078	389	-0.529228	0.885061	-0.285155	0.986975	-0.349425	0.541221	-0.105352	0.900842	21.0293	19.1779	15.7047	14.0023	12.3036	17.2124	8.58321	25.8877	14.3849	15.4574	12.8341	22.6862	ENSMUSG00000041779	inside	23167	Tram2
chr1	21096934	21097973	1040	-0.242341	0.887848	-0.153683	0.983547	-0.31442	0.176613	-0.225762	0.475	80.1802	58.4323	74.9819	48.8202	55.932	65.0585	71.0886	90.7332	75.4651	76.8138	80.5862	65.37	ENSMUSG00000041779	inside	30411	Tram2
chr1	21166250	21167208	959	0.0631983	0.990025	0.0610507	0.996879	0.306174	0.310427	0.304026	0.43045	36.8722	22.8513	43.6553	30.8331	36.2786	36.7466	39.7899	29.169	26.4817	30.3549	27.9125	28.6292	ENSMUSG00000099971	downstream	14278	NA
chr1	21218433	21219005	573	-0.00734324	0.998874	-0.104218	0.995158	-0.248097	0.447539	-0.344971	0.366523	57.1058	46.9247	56.444	38.3633	42.7271	77.4912	57.0213	73.8789	61.8492	60.2977	61.7315	67.8798	ENSMUSG00000100819	upstream	30207	NA
chr1	21271440	21272389	950	-0.0853937	0.984078	-0.296639	0.956385	0.158744	0.619608	-0.0525017	0.912787	33.8883	25.6854	24.7769	23.7535	25.7712	30.7887	25.6064	31.4084	26.5816	22.0023	25.4934	23.0515	ENSMUSG00000025933	upstream	16410	Tmem14a
chr1	21411314	21412001	688	-0.350134	0.86028	-0.51643	0.749851	-0.708078	0.00710367	-0.874374	0.00327489	33.3691	27.5601	31.8619	16.1168	28.3612	21.5128	30.5046	58.8194	54.2222	38.9821	38.9071	40.8562	ENSMUSG00000067750	upstream	7864	Khdc1a
chr1	21448383	21448489	107	0.897917	NA	0.523307	0.983547	0.104331	0.925477	-0.270279	0.843729	7.39862	18.8829	20.151	9.09031	46.4501	19.7608	42.3488	22.6573	16.0912	24.9759	32.7602	24.4374	ENSMUSG00000094926	upstream	1290	NA
chr1	21491877	21492070	194	-0.194085	0.984558	1.4062	0.824615	1.94284	0.000932291	3.54312	1.99383e-05	62.5705	17.6251	40.7522	29.0796	32.2615	56.3114	23.3573	4.80637	2.21877	10.8235	5.47539	11.7936	ENSMUSG00000085679	downstream	30552	NA
chr1	21519964	21520680	717	-0.540962	0.822094	-0.922739	0.477054	-0.520397	0.219378	-0.902174	0.0393141	27.6029	17.7748	11.7782	8.13944	14.1205	10.3213	18.9595	37.7136	32.6182	18.503	18.0741	19.146	ENSMUSG00000104138	downstream	4235	NA
chr1	21635539	21636117	579	-0.23017	0.970882	-0.0765878	0.996879	-0.598435	0.211962	-0.444853	0.483424	11.394	8.85819	18.93	6.38363	13.035	12.7814	12.7689	21.9018	13.8772	16.8139	19.0797	14.1127	ENSMUSG00000082935	upstream	52259	Gm7658
chr1	21664963	21665389	427	-0.329396	0.94405	0.201168	0.995158	2.01819	4.95378e-06	2.54875	2.49068e-06	28.4278	21.475	34.5053	19.1344	18.1062	28.06	25.1337	5.6776	4.03223	5.58803	2.98518	9.95093	ENSMUSG00000082935	upstream	81683	Gm7658
chr1	21829956	21830343	388	0.148509	0.985118	-0.219899	0.990446	-0.60597	0.180494	-0.974378	0.0518533	15.6426	20.429	12.5035	17.548	26.0938	7.26598	19.0547	36.0478	28.1044	30.2566	27.6507	23.5871	ENSMUSG00000103748	downstream	78829	NA
chr1	21961306	21961832	527	0.0635807	0.991416	-0.173273	0.990735	0.312847	0.422062	0.0759936	0.904736	24.5357	29.4916	41.2548	23.9936	34.2312	38.7841	37.5611	36.4482	24.5033	23.9062	25.3967	32.8711	ENSMUSG00000103748	upstream	50568	NA
chr1	22258459	22258620	162	-0.404313	NA	0.172747	0.99616	-0.159632	0.857843	0.417428	0.657299	27.6916	20.1472	16.637	13.209	20.4533	15.2272	14.7216	13.8139	17.7136	15.3181	16.3924	24.2111	ENSMUSG00000100418	upstream	49453	NA
chr1	22268782	22269288	507	0.0757591	0.991868	-0.558832	0.937132	0.615569	0.166653	-0.0190228	0.981789	16.1349	15.3275	29.0607	18.4173	20.3323	27.8028	19.7566	25.7477	15.5649	15.0601	9.84707	18.0509	ENSMUSG00000100418	upstream	38785	NA
chr1	22805560	22806521	962	-0.07768	0.98981	-0.320327	0.974375	0.554374	0.0816524	0.311726	0.494697	47.7296	31.9889	54.9126	24.6705	41.7146	50.1859	54.0447	36.8322	35.348	30.2602	24.0712	32.9568	ENSMUSG00000097642	downstream	24914	NA
chr1	23061964	23062246	283	-0.436795	0.923695	-0.273939	0.989573	0.100792	0.889959	0.263647	0.736147	45.6902	24.7136	33.0154	12.3731	17.5624	41.0926	32.8662	23.0638	33.4618	20.5727	23.2714	27.7187	ENSMUSG00000101468	upstream	35758	NA
chr1	23104477	23104623	147	0.521102	0.984078	0.0274368	0.999855	0.672317	0.740948	0.178653	0.952949	100.527	48.6351	26.8909	47.6406	3.75674	218.153	68.1402	50.7448	52.707	17.5305	9.39384	133.408	ENSMUSG00000073730	downstream	34931	Ppp1r14bl
chr1	23117596	23117727	132	-0.1661	NA	-0.0533255	0.996961	-0.564166	0.47688	-0.451391	0.659089	21.9903	16.484	13.6121	14.7373	13.9455	18.6879	14.454	16.9534	29.3482	14.4612	24.1415	32.1898	ENSMUSG00000073730	downstream	21827	Ppp1r14bl
chr1	23121041	23121198	158	-0.214716	NA	-0.0963861	0.996879	0.173021	0.876189	0.291351	0.821273	35.0732	10.8204	18.1954	13.5434	27.9615	24.5342	6.03774	17.7045	16.3458	7.85296	16.1351	26.8927	ENSMUSG00000073730	downstream	18356	Ppp1r14bl
chr1	23173292	23173697	406	0.50618	0.894675	0.188867	0.995158	0.936561	0.0491947	0.619248	0.371737	7.14957	14.9296	18.145	20.1241	20.403	18.2276	18.7973	10.5645	7.42139	9.40331	7.58733	15.2959	ENSMUSG00000073730	upstream	31958	Ppp1r14bl
chr1	23187311	23188216	906	-0.265159	0.964789	-0.30804	0.983216	-0.18535	0.751597	-0.228232	0.740178	13.1068	8.92041	6.74296	10.3064	6.90808	6.61237	7.37057	14.4085	7.91833	9.27046	9.61397	7.57599	ENSMUSG00000073730	upstream	45977	Ppp1r14bl
chr1	23202612	23203192	581	-0.0321816	0.995667	-0.715619	0.808878	-0.116008	0.850034	-0.799445	0.110135	18.6218	14.1778	12.3704	8.37059	12.6733	18.1962	20.1137	32.4186	19.7563	16.0989	18.0999	12.3764	ENSMUSG00000073730	upstream	61278	Ppp1r14bl
chr1	23214596	23214716	121	-0.0498378	0.995667	-1.51553	0.584744	1.72261	0.00746324	0.256915	0.80674	30.5321	32.1118	32.6691	17.6848	28.9051	55.3356	25.623	24.6595	28.4589	10.2543	6.14511	13.5062	ENSMUSG00000101227	inside	60038	NA
chr1	23255907	23257041	1135	0.115441	0.967337	-0.00293075	0.999855	-0.128065	0.608573	-0.246437	0.372275	112.529	103.66	130.288	96.495	120.341	140.65	144.145	144.918	129.195	144.048	141.037	124.117	ENSMUSG00000101227	inside	17713	NA
chr1	23271019	23271654	636	-0.366927	0.940885	-0.172268	0.993929	-0.883721	0.051957	-0.689063	0.235641	13.2772	16.8617	5.93283	6.72912	9.84076	14.9604	6.74973	21.9914	16.9198	16.8077	15.3655	20.0427	ENSMUSG00000101227	inside	3100	NA
chr1	23286871	23287035	165	-0.0767432	0.993449	-0.229378	0.990887	-0.145463	0.844396	-0.298098	0.71229	28.7874	17.897	33.7581	21.2217	31.2378	21.3576	26.0172	40.6881	25.2177	30.6576	25.1072	27.7327	ENSMUSG00000089553	downstream	2459	Gm24176
chr1	23320533	23322038	1506	0.393198	0.826277	0.392563	0.906015	-0.47957	0.0881838	-0.480204	0.185832	11.7399	12.0745	8.23235	14.7256	16.9901	13.3379	10.6101	13.8689	15.8152	21.6111	17.9154	18.8818	ENSMUSG00000097970	upstream	8580	NA
chr1	23380217	23381037	821	-0.205831	0.964252	-0.238821	0.983216	-0.859497	0.00481332	-0.892486	0.0153908	38.8916	40.1331	22.9798	18.7187	40.5828	21.0324	36.6015	67.9168	58.196	51.6163	48.777	60.513	ENSMUSG00000101226	downstream	4000	Gm20954
chr1	23382746	23383612	867	0.105379	0.97301	-0.134402	0.987259	0.0541847	0.864866	-0.185596	0.569319	91.6138	95.1886	134.086	90.8716	112.316	136.977	122.409	123.034	120.643	114.158	114.064	104.049	ENSMUSG00000101226	downstream	1425	Gm20954
chr1	23493102	23493905	804	0.301199	0.931075	0.0655069	0.996879	-0.319899	0.427833	-0.555591	0.21841	27.8982	18.3644	14.0794	19.8404	37.5487	21.4771	18.3911	27.1381	31.2301	29.4403	34.2185	27.644	ENSMUSG00000097920	upstream	24715	Gm7784
chr1	23536381	23537202	822	0.0493193	0.995667	-0.206116	0.989573	-1.27573	0.000261784	-1.53117	0.000181729	11.2359	10.7774	8.74355	7.33639	19.035	8.1455	6.96323	29.0394	30.0226	25.7767	24.5527	26.6411	ENSMUSG00000097920	downstream	16773	Gm7784
chr1	23761834	23763180	1347	-0.0102046	0.998874	-0.138059	0.989573	0.0422505	0.910755	-0.085604	0.846557	26.839	21.692	26.145	22.8182	21.3189	28.5164	26.558	29.9044	22.9014	20.9026	22.869	29.118	ENSMUSG00000026156	upstream	37654	B3gat2
chr1	23792888	23793344	457	0.301231	0.968666	-0.139891	0.99616	-0.297781	0.648475	-0.738903	0.275314	6.92913	4.42117	12.1884	11.0675	11.2784	8.48228	7.30606	14.2824	11.9305	12.1132	11.3893	12.1585	ENSMUSG00000026156	upstream	7490	B3gat2
chr1	23912994	23913334	341	0.198132	0.984078	-0.739514	0.92323	0.0845662	0.922344	-0.853079	0.223939	10.0601	8.65982	14.2269	9.69811	8.09737	11.3677	21.681	18.594	21.0382	10.3561	9.03359	18.2116	ENSMUSG00000026155	inside	29067	Smap1
chr1	23921691	23922696	1006	0.250886	0.901058	0.0474778	0.996879	-0.0126421	0.973907	-0.21605	0.549205	41.445	39.8595	59.1194	45.0558	54.7117	62.0028	62.1119	52.6465	56.194	66.7916	51.6331	49.3849	ENSMUSG00000026155	inside	37764	Smap1
chr1	23934924	23935613	690	0.435384	0.878058	-0.0236921	0.998276	0.637213	0.100793	0.178137	0.786223	21.7991	15.7673	14.8431	17.7617	18.408	36.7722	22.4665	16.7568	13.9321	11.0659	18.3196	16.1056	ENSMUSG00000026155	inside	25785	Smap1
chr1	24005211	24005911	701	0.217842	0.940293	-0.180497	0.984942	0.164773	0.631711	-0.233566	0.566141	47.055	37.913	67.6684	46.3437	68.8003	67.3632	54.7746	67.0396	52.8073	54.7337	51.6718	51.7551	ENSMUSG00000102495	upstream	38675	NA
chr1	24099687	24100770	1084	0.0460568	0.991343	0.0772171	0.995219	-0.216609	0.441487	-0.185449	0.617934	62.8064	55.3436	72.9328	44.8645	65.8884	69.2447	83.6037	80.5129	64.4602	74.8405	79.667	74.4759	ENSMUSG00000026153	inside	38652	Fam135a
chr1	24302790	24302933	144	0.389641	0.966421	-0.449139	0.984849	1.16077	0.082038	0.321994	0.770333	23.8229	19.4276	29.9467	21.6147	29.4017	51.3917	28.1551	23.3109	15.9422	8.61644	8.85188	31.7771	ENSMUSG00000026147	downstream	11025	Col9a1
chr1	24367921	24368472	552	-0.431071	0.912944	-0.6233	0.916788	0.13945	0.833629	-0.0527794	0.952248	21.0342	14.6411	13.3458	6.69587	10.6713	16.5986	15.1217	19.9325	13.7762	10.3743	8.65945	14.803	ENSMUSG00000026147	downstream	76156	Col9a1
chr1	24373651	24373832	182	-0.713277	NA	-1.14495	0.823121	-0.796626	0.351011	-1.2283	0.147451	17.399	8.53961	13.8215	5.3443	8.09143	9.68133	9.17272	23.5671	37.0526	16.7813	5.25277	21.5505	ENSMUSG00000026147	downstream	81886	Col9a1
chr1	24387305	24387770	466	-0.0968821	0.989143	-0.934889	0.302761	-0.0787828	0.88253	-0.91679	0.0183544	28.88	24.3471	21.2069	14.1934	27.2565	20.418	30.1952	48.8228	44.3372	23.5537	21.4269	29.4586	ENSMUSG00000026147	downstream	95540	Col9a1
chr1	24455579	24455789	211	0.184439	NA	-0.717691	0.96932	0.655112	0.406275	-0.247017	0.833105	13.757	10.3123	17.0313	11.0635	29.6622	13.3611	6.78172	16.7927	15.64	9.49913	8.55822	12.3924	ENSMUSG00000077463	downstream	132133	Gm26418
chr1	24471070	24471628	559	0.233861	0.968666	-0.314852	0.979376	-0.460025	0.311225	-1.00874	0.0331167	26.9077	26.9693	21.2145	12.18	27.3321	26.4773	52.0498	46.3716	54.158	39.6117	33.634	49.1152	ENSMUSG00000077463	downstream	116294	Gm26418
chr1	24553502	24554011	510	-0.12264	0.985782	-0.0990012	0.996879	0.657378	0.118569	0.681016	0.190873	36.7368	20.7228	47.5624	18.309	29.9581	43.5318	37.8779	23.0367	20.5374	17.2173	18.3286	26.9171	ENSMUSG00000077463	downstream	33911	Gm26418
chr1	24586504	24587506	1003	0.0291696	0.997213	-0.440837	0.974375	0.556476	0.282523	0.0864689	0.923875	10.7869	10.8469	12.1817	10.0854	8.99295	12.9998	14.2666	15.4321	6.00814	5.80465	5.08343	14.0125	ENSMUSG00000077463	downstream	416	Gm26418
chr1	24612379	24613513	1135	0.609751	0.830362	0.0483366	0.996879	1.01639	0.0208332	0.454977	0.498608	2138.74	957.311	2370.83	1763.65	2631.62	3823.93	2904.12	1603.46	1055.31	1098.57	1382.86	1642.89	ENSMUSG00000026141	inside	13040	Col19a1
chr1	24677894	24679299	1406	0.0797861	0.980285	-0.088135	0.993049	0.0918868	0.741567	-0.0760343	0.835987	63.0619	58.1447	76.8049	58.5258	73.4487	67.9235	79.2142	73.746	65.5151	68.8334	72.3009	53.9326	ENSMUSG00000101249	upstream	22616	NA
chr1	24684066	24684233	168	0.598898	0.959704	0.311711	0.995219	0.181151	0.892421	-0.106037	0.953357	65.971	42.5557	44.92	105.372	36.1586	117.467	51.1051	57.7222	52.097	27.2696	25.9234	155.643	ENSMUSG00000101249	upstream	28788	NA
chr1	24699288	24699750	463	-0.0979877	0.984078	-0.196665	0.983547	-0.13794	0.712669	-0.236617	0.577763	106.01	97.6836	97.0194	51.6793	109.335	104.274	110.231	129.292	106.913	107.4	113.335	86.1246	ENSMUSG00000073725	upstream	17961	Lmbrd1
chr1	25016166	25016389	224	-0.440764	0.94405	-0.846839	0.928028	0.943081	0.155589	0.537006	0.5336	22.383	18.0399	16.845	14.7636	9.03965	15.7322	17.035	13.3205	12.8107	8.09566	4.74208	10.2141	ENSMUSG00000100483	upstream	11927	NA
chr1	25105445	25105671	227	-0.00354885	0.99962	0.350447	0.989573	1.85522	9.93918e-05	2.20921	0.000245081	58.1243	30.1256	30.8701	34.2789	29.1933	62.097	33.6198	6.57224	10.1131	8.40913	14.5062	8.6392	ENSMUSG00000099392	upstream	39132	NA
chr1	25107893	25108028	136	0.428739	0.943708	0.365089	0.989573	1.21613	0.03334	1.15248	0.138996	19.4032	26.2844	35.6718	38.6204	31.1312	54.4147	26.3041	9.59861	14.77	12.6322	18.7452	16.8232	ENSMUSG00000099392	upstream	41580	NA
chr1	25228702	25228885	184	0.334452	0.966557	-0.534582	0.978771	1.76186	0.00124092	0.892824	0.242918	48.7612	12.6702	46.873	38.0607	29.0126	40.2196	72.5841	21.2839	17.1552	11.4117	14.4324	14.2109	ENSMUSG00000080849	upstream	33926	NA
chr1	25978124	25978289	166	2.01254	NA	-0.709624	0.978771	-0.755338	0.510423	-3.4775	0.00689	0	0.936271	3.24723	4.68753	3.32675	8.49157	8.62014	22.4683	11.2364	7.4745	14.7176	7.8759	ENSMUSG00000101618	downstream	57396	Gm18443
chr1	26291580	26292056	477	0.2704	0.965491	-0.525493	0.937132	-0.587032	0.188285	-1.38292	0.00250793	10.5111	14.3365	16.5743	11.8269	15.4365	11.8206	27.9989	42.6145	30.3805	26.212	19.3739	31.5201	ENSMUSG00000099458	upstream	213261	Gm19123
chr1	26318617	26319033	417	-0.00563016	0.999513	-0.296966	0.983677	0.0283641	0.968314	-0.262972	0.711907	27.2111	11.9268	13.3575	12.5956	14.5675	18.5919	22.8768	22.8078	18.2361	17.6239	15.7933	16.4601	ENSMUSG00000099458	upstream	186284	Gm19123
chr1	26686047	26688420	2374	0.0830273	0.995667	-0.0253181	0.999855	0.477999	0.642315	0.369654	0.789026	49.7979	26.7764	24.9766	43.1839	17.6791	58.486	24.1103	25.5301	26.8345	14.6744	10.9176	51.905	ENSMUSG00000073722	downstream	32475	4931408C20Rik
chr1	27444045	27444982	938	-0.0857521	0.991241	-0.361962	0.978601	-0.114089	0.851567	-0.390299	0.515593	10.4091	9.27886	6.89603	5.59955	8.63489	6.38678	12.4585	11.1336	11.9312	10.0735	6.79462	10.4536	ENSMUSG00000100310	upstream	68196	NA
chr1	28047495	28047974	480	-0.0237794	0.998874	-1.01544	0.866133	0.246164	0.791215	-0.745501	0.407513	11.5449	5.1807	13.476	4.45804	3.835	14.6833	17.3899	19.8143	13.7502	7.35711	5.08983	13.6187	ENSMUSG00000101372	downstream	16632	Gm19028
chr1	28054078	28054290	213	0.272007	0.97301	-0.685247	0.94071	0.469594	0.478226	-0.48766	0.548619	17.3445	20.4309	27.8377	15.5261	16.4203	26.4714	49.2657	35.0211	26.9446	17.0275	15.4596	27.6211	ENSMUSG00000101372	downstream	23215	Gm19028
chr1	28328548	28329273	726	-0.458305	0.929805	-1.92244	0.0480562	1.38701	0.00894874	-0.0771244	0.939509	14.9026	13.4869	17.8195	3.21541	11.917	10.1934	19.71	16.6965	15.8105	3.28663	3.36518	7.2033	ENSMUSG00000103241	upstream	279726	NA
chr1	28348565	28348872	308	-0.332635	0.950065	-0.438478	0.974375	0.554857	0.283871	0.449014	0.498385	33.4139	22.7076	44.3366	13.2636	23.3088	41.1896	30.9728	24.2191	24.6898	20.1423	15.1747	19.1016	ENSMUSG00000103241	upstream	260127	NA
chr1	28538701	28539721	1021	-0.0839216	0.989867	-0.767507	0.439215	-1.1785	4.69087e-05	-1.86209	6.11639e-09	11.1136	13.8524	9.50315	9.7171	11.8994	6.55789	14.7159	50.2292	33.8675	23.6506	26.4256	23.6894	ENSMUSG00000103241	upstream	69278	NA
chr1	30578945	30579296	352	-0.266172	0.967887	-0.290117	0.983216	-1.41631	0.000315354	-1.44026	0.00143367	13.4941	17.6615	10.2091	11.6056	15.6886	9.01023	8.80789	36.5557	38.7233	28.1993	37.1176	25.9994	ENSMUSG00000118988	upstream	179182	NA
chr1	30583395	30584235	841	-0.157427	0.991026	-0.640143	0.978601	-1.89226	0.00543208	-2.37498	0.00294931	11.9234	10.9035	2.35015	5.32015	8.09865	11.7327	5.10444	45.0142	41.628	35.7488	33.0919	13.9912	ENSMUSG00000118988	upstream	174243	NA
chr1	30594956	30595605	650	0.0793838	0.993015	-0.397677	0.979376	0.0868107	0.911938	-0.390251	0.619109	16.645	10.2817	7.74006	11.0734	4.248	14.096	19.4462	16.9273	13.0236	12.6279	8.66123	13.074	ENSMUSG00000118988	upstream	162873	NA
chr1	30872839	30874271	1433	0.179533	0.930568	0.145729	0.983547	0.0618654	0.834207	0.0280613	0.945438	44.748	52.277	65.5776	56.8801	61.0175	54.8397	73.2281	55.3085	51.3645	62.4746	59.968	53.8287	ENSMUSG00000103783	inside	210	NA
chr1	30940796	30940925	130	-0.361309	NA	-0.949724	0.958744	-0.15283	0.911068	-0.741246	0.55256	28.4183	3.58664	9.67508	4.48921	11.328	10.8431	14.6763	22.9523	20.9702	8.81018	11.4394	15.0854	ENSMUSG00000048874	upstream	27794	Phf3
chr1	30949025	30950436	1412	-0.00423629	0.998874	-0.0281215	0.996879	-0.127593	0.534895	-0.151478	0.548599	105.404	104.458	114.145	88.3112	109.901	112.808	120.428	122.96	117.06	122.481	120.441	109.259	ENSMUSG00000048874	upstream	36023	Phf3
chr1	31019341	31019889	549	-0.0387643	0.995667	-0.0543075	0.996879	0.397818	0.53239	0.382275	0.638756	20.1879	10.4746	13.4187	10.9845	9.38842	23.1082	14.3355	10.1906	12.022	6.6063	8.12632	19.6467	ENSMUSG00000117091	upstream	2292	Gm5698
chr1	31050142	31050655	514	0.257921	0.97077	-0.295097	0.989573	0.0261279	0.974195	-0.52689	0.46379	8.21429	16.3283	23.4213	7.56936	22.2042	21.2537	26.9114	23.2202	23.4481	14.1123	15.4994	29.2512	ENSMUSG00000086726	upstream	24108	Gm9458
chr1	31072820	31073472	653	-0.0163004	0.997853	-0.34382	0.973622	1.24147	2.39162e-05	0.913953	0.0132507	46.8768	29.7513	34.1199	30.9822	35.8012	35.0781	43.0963	21.4189	17.578	13.0084	12.3628	23.0246	ENSMUSG00000100237	upstream	7528	NA
chr1	31094031	31094252	222	-0.0431832	0.995667	-0.159346	0.993367	0.480048	0.254765	0.363886	0.519153	54.6787	44.806	52.609	40.3086	54.7265	50.7964	50.4913	52.922	26.4986	42.5627	33.4936	26.5013	ENSMUSG00000100237	downstream	11275	NA
chr1	31095762	31096244	483	-0.365698	0.892979	-0.543823	0.895112	1.41421	1.34679e-05	1.23609	0.00133605	54.0881	32.1783	56.9173	33.0262	30.4895	43.0468	41.9704	23.9383	16.6354	14.4252	10.7762	17.5944	ENSMUSG00000100237	downstream	13006	NA
chr1	31153761	31154650	890	-0.0872073	0.985118	-0.172696	0.98547	-0.0804239	0.831066	-0.165913	0.690328	38.8414	33.0051	53.904	34.7536	36.816	42.3672	44.4825	56.1557	38.2076	43.0032	38.7892	43.7024	ENSMUSG00000100910	upstream	20457	NA
chr1	31260192	31260847	656	-0.30487	0.966421	-0.488119	0.974375	-0.514529	0.363358	-0.697778	0.282111	23.7335	14.2153	12.5995	5.33778	16.2754	19.339	13.815	30.1336	24.0592	14.5493	11.9824	33.3825	ENSMUSG00000086727	inside	918	Gm29669;4931428L18Rik
chr1	32172445	32173142	698	-0.0767036	0.995667	-0.0290366	0.999855	1.45077	0.0528543	1.49844	0.108027	34.4032	14.4733	28.5738	21.1812	13.45	41.3995	22.209	8.54956	9.66127	4.78585	4.8698	18.2624	ENSMUSG00000026058	upstream	38653	Khdrbs2
chr1	32378532	32378987	456	0.112548	0.995667	-0.366256	0.99616	0.751634	0.632158	0.27283	0.90857	29.5134	5.45337	14.1853	16.2111	7.67	35.5491	11.5061	11.8599	15.1032	3.3489	1.86355	27.2375	ENSMUSG00000064688	upstream	126212	Gm25814
chr1	33265771	33266317	547	-0.483199	0.889945	-0.548056	0.936483	-0.793191	0.0681795	-0.858047	0.0869076	19.2968	17.048	11.8254	9.60216	19.5185	6.44242	8.71995	33.0699	24.9189	21.6362	17.4772	20.3161	ENSMUSG00000101754	upstream	8703	NA
chr1	33533482	33533785	304	0.0274952	0.997305	-0.305064	0.983547	-0.0198436	0.978764	-0.352403	0.598682	15.6247	20.4501	14.1853	17.2776	19.3769	15.0697	16.4747	23.9243	19.3509	17.5817	19.5673	13.9771	ENSMUSG00000101682	downstream	11883	NA
chr1	33645677	33646001	325	-0.0343152	0.995667	0.071089	0.996879	-0.679506	0.145823	-0.574102	0.345404	25.9824	18.6505	14.3744	21.5482	26.6208	10.8431	14.6763	35.576	22.5154	36.7091	27.1276	26.148	ENSMUSG00000102714	downstream	6838	NA
chr1	33669628	33670612	985	-0.12791	0.969197	-0.0497085	0.996879	-0.145376	0.615835	-0.0671749	0.872854	34.5595	31.3998	33.0173	31.2042	30.462	28.2636	30.2653	39.38	29.8614	37.1116	29.3325	33.5146	ENSMUSG00000102714	upstream	13715	NA
chr1	33673455	33673622	168	-0.59884	0.901237	0.0877655	0.996879	1.15718	0.0663916	1.84378	0.00937274	47.1222	24.0532	47.0591	24.3166	32.8714	27.2691	18.4546	7.7703	13.6648	8.52175	7.58733	23.3464	ENSMUSG00000102714	upstream	17542	NA
chr1	33719701	33720419	719	0.274427	0.905602	-0.0640002	0.996879	-0.00338405	0.993794	-0.341811	0.352809	22.755	30.2628	41.4838	38.9606	34.307	41.1705	39.8037	43.5742	37.1173	40.62	40.6276	33.185	ENSMUSG00000102198	upstream	6392	NA
chr1	33732954	33733379	426	-0.0856697	0.991026	0.144011	0.995219	1.24474	0.00202128	1.47442	0.00271614	24.7779	24.809	26.5724	18.7226	27.2231	27.2986	22.9533	9.19303	9.09382	7.61757	7.48047	18.4141	ENSMUSG00000102198	upstream	19645	NA
chr1	33757179	33758210	1032	-0.0948204	0.984078	-0.00335149	0.999855	-0.40478	0.156459	-0.313311	0.409659	28.1272	27.8613	20.0225	22.4316	20.6912	25.952	26.1138	34.876	28.0843	27.3753	27.2762	41.173	ENSMUSG00000004768	upstream	758	Rab23
chr1	33813864	33814694	831	-0.255062	0.85814	-0.186118	0.97519	-0.340199	0.103658	-0.271255	0.318954	53.0309	61.9065	69.1909	45.8825	53.3854	51.7363	55.6765	71.5877	77.0062	70.2906	67.1081	57.0316	ENSMUSG00000042215	upstream	16988	Bag2
chr1	33876479	33876782	304	-0.439435	0.931075	0.0212395	0.999095	-0.904499	0.0705522	-0.443824	0.534564	21.701	20.4501	11.8211	14.7179	9.0829	17.3882	12.5521	30.0588	18.879	20.0934	20.2662	36.5556	ENSMUSG00000081402	inside	979	Gm15455
chr1	33883401	33883719	319	0.0529499	0.993333	0.08717	0.996742	0.0455265	0.933993	0.0797465	0.905708	24.8167	33.1305	27.5998	28.6615	35.2003	28.7223	26.1667	27.4762	26.9869	29.9196	25.9729	31.7628	ENSMUSG00000081402	upstream	5640	Gm15455
chr1	33900202	33900442	241	-0.725884	0.730677	-0.41502	0.978771	1.43669	0.000725865	1.74755	0.000255454	64.6024	47.0777	58.1537	28.2516	26.7336	33.6316	48.4898	11.6071	21.4327	9.50476	13.6635	16.2747	ENSMUSG00000081402	upstream	22441	Gm15455
chr1	33907213	33908531	1319	-0.0316305	0.994174	0.0441809	0.996879	0.401321	0.108239	0.477132	0.112153	30.8098	29.9294	39.9138	29.792	28.4703	37.9385	35.9815	28.5598	19.9067	22.8659	26.0121	26.0191	ENSMUSG00000104416	downstream	20040	NA
chr1	33927005	33927403	399	-0.478583	0.880394	0.44738	0.978771	1.86497	9.1929e-06	2.79093	7.94428e-08	35.7137	29.2145	43.2313	25.3526	14.7633	34.4451	30.4838	3.73909	6.47279	5.50176	7.188	9.83007	ENSMUSG00000104416	downstream	1168	NA
chr1	33944906	33945557	652	-0.569012	0.610742	0.164179	0.990735	1.10533	5.0034e-05	1.83852	4.45133e-09	57.4717	42.6693	54.5654	37.2954	27.9508	38.9154	35.1152	15.1592	13.6438	15.0777	12.8705	22.5587	ENSMUSG00000042182	inside	1340	Bend6
chr1	33960393	33960858	466	-0.598509	0.765071	0.72431	0.920493	1.71849	8.67349e-06	3.04131	7.52522e-10	37.3742	28.0158	33.931	16.6981	20.5411	22.6867	27.6363	4.00187	4.00267	4.71074	6.83837	9.81953	ENSMUSG00000103596	upstream	678	NA
chr1	33989575	33990207	633	-0.109701	0.985118	0.387999	0.974375	1.35315	3.83204e-05	1.85085	4.91082e-06	24.5958	20.3791	24.9792	25.5074	20.0656	19.485	20.7219	7.07061	5.89334	8.44367	6.37671	11.8761	ENSMUSG00000099382	downstream	12226	NA
chr1	34005588	34006161	574	-0.298014	0.90908	0.0815355	0.99616	-0.481081	0.116497	-0.101531	0.847111	29.8824	27.0768	21.5992	20.6733	20.2039	19.646	24.0984	27.6157	28.2461	28.9324	26.4631	34.7349	ENSMUSG00000099382	upstream	2822	NA
chr1	34011041	34012207	1167	-0.18351	0.936444	0.0427279	0.996879	-0.183207	0.492533	0.0430314	0.921001	54.7215	41.5521	41.1093	36.8395	39.9077	41.0681	42.9161	42.6667	45.7366	44.0006	38.1382	56.2955	ENSMUSG00000099382	upstream	8275	NA
chr1	34042397	34042528	132	-0.794397	0.822094	-0.923463	0.932585	1.6597	0.00968654	1.53064	0.028985	47.9789	35.3229	44.92	32.4221	13.9455	29.3667	23.4877	14.1278	15.2176	7.23058	7.24245	9.90454	ENSMUSG00000084506	upstream	21814	Gm23792
chr1	34043605	34044121	517	-0.121149	0.985118	0.067644	0.996879	0.389592	0.381393	0.578385	0.257251	20.4166	23.4484	26.0658	25.5865	18.8709	17.0406	23.9875	17.3141	14.1538	11.2612	15.4095	25.2882	ENSMUSG00000084506	upstream	23022	Gm23792
chr1	34060407	34061384	978	0.0598674	0.989821	0.0923445	0.994356	-0.0281413	0.939701	0.00433577	0.99314	29.4104	28.6051	34.9072	31.0297	34.4444	32.7898	30.9696	30.6998	31.102	38.0603	34.43	24.3968	ENSMUSG00000103364	upstream	9797	NA
chr1	34120849	34122022	1174	-0.248696	0.91025	-0.354278	0.917204	0.0186755	0.964084	-0.0869068	0.848339	24.7251	26.08	23.8757	22.5353	19.2861	20.7118	21.3301	20.4914	32.1425	22.4382	18.3673	21.4373	ENSMUSG00000105982	upstream	34418	Mir6896
chr1	34122990	34123549	560	0.324383	0.890101	-0.108128	0.995158	0.344131	0.291715	-0.0883801	0.872196	30.1582	28.0313	22.7809	33.3484	25.9684	37.1279	39.1806	25.975	31.002	25.0539	24.8485	30.934	ENSMUSG00000105982	upstream	32891	Mir6896
chr1	34127800	34128009	210	-0.557834	0.874848	-1.3341	0.169207	-0.0407464	0.957875	-0.817017	0.12675	32.6714	21.4629	26.5242	19.4533	13.1486	18.4591	21.5777	50.618	43.0441	17.7252	20.2329	17.1207	ENSMUSG00000105982	upstream	28431	Mir6896
chr1	34132946	34133222	277	-0.639206	0.876129	-1.47129	0.715956	3.28443	1.78693e-07	2.45235	0.000200715	52.3958	28.0543	44.1092	25.9845	23.9238	20.3552	35.3001	2.69296	11.9135	1.72281	1.15043	8.25975	ENSMUSG00000105982	upstream	23218	Mir6896
chr1	34145643	34145771	129	0.308488	NA	-0.868081	0.974375	-0.319669	0.808165	-1.49624	0.194907	10.2281	10.8433	2.78574	18.0961	5.70791	2.73178	11.0926	24.5758	20.0205	10.3582	6.58745	22.8035	ENSMUSG00000105982	upstream	10669	Mir6896
chr1	34150567	34151062	496	0.293004	0.902466	-0.0518765	0.996879	0.00237546	0.996066	-0.342505	0.378191	28.1973	27.2613	31.8787	38.8281	29.3192	40.4976	35.1004	34.9664	38.7628	37.3308	37.6919	30.3127	ENSMUSG00000105982	upstream	5378	Mir6896
chr1	34167407	34167958	552	-0.0773651	0.990025	0.282346	0.978918	0.826778	0.0091762	1.18649	0.00157106	26.7709	30.1269	44.269	35.5938	39.3505	24.8978	27.219	15.5406	14.296	20.057	16.3567	17.7636	ENSMUSG00000105982	downstream	10895	Mir6896
chr1	34236205	34236794	590	-0.09965	0.975691	-0.175696	0.978918	-0.268473	0.270365	-0.344519	0.22692	62.1693	80.3447	71.2629	51.4357	68.952	69.2855	78.419	87.5542	94.1133	82.8256	80.4771	77.5576	ENSMUSG00000096992	upstream	18678	NA
chr1	34253756	34254289	534	-0.426467	0.863914	0.071709	0.996879	1.70947	9.60567e-07	2.20765	1.01961e-07	36.0741	30.5603	27.2548	23.6791	20.3384	22.4375	26.3501	5.2384	8.06069	7.68553	4.97297	9.79326	ENSMUSG00000096992	upstream	36229	NA
chr1	34261115	34261278	164	-0.261337	0.973902	-0.0512131	0.998184	2.60494	1.62292e-05	2.81506	0.000162924	37.0081	34.1168	44.92	35.5852	26.9386	45.1244	23.2674	6.8227	4.3744	6.40171	1.9431	9.96494	ENSMUSG00000096992	upstream	43588	NA
chr1	34268603	34268774	172	0.172943	0.986895	-0.97615	0.858	1.31382	0.0269842	0.164728	0.87882	18.4105	37.9516	17.7591	39.5851	23.5451	30.7326	19.412	30.3584	15.0154	11.653	11.1163	11.4017	ENSMUSG00000103001	downstream	40189	NA
chr1	34287810	34288064	255	0.00413891	0.999609	0.690578	0.956728	1.98952	1.17303e-05	2.67596	6.9533e-06	44.4981	26.8177	45.8008	48.8239	20.9346	51.1326	36.475	6.5819	5.62667	11.9772	8.74774	7.69059	ENSMUSG00000103001	downstream	20899	NA
chr1	34303927	34304764	838	0.18331	0.970331	0.164383	0.990887	0.0229593	0.966528	0.00403189	0.995557	21.7279	19.6595	14.5802	31.3388	19.5503	13.8773	18.4987	15.1326	21.7446	21.64	21.8023	18.3317	ENSMUSG00000103001	downstream	4199	NA
chr1	34326743	34327243	501	-0.246321	0.96996	-0.994265	0.705859	1.15959	0.0124915	0.411649	0.544151	14.748	20.4746	16.1389	21.7442	8.08336	16.1781	12.3768	13.028	12.8874	6.0962	5.72457	8.48114	ENSMUSG00000103001	upstream	16534	NA
chr1	34388935	34390093	1159	-0.0888663	0.980806	-0.576076	0.411287	-0.251106	0.33418	-0.738315	0.00278411	26.6389	26.4175	21.0841	23.1626	27.1594	19.1555	22.4292	40.5477	41.7194	28.246	26.4869	28.201	ENSMUSG00000102839	overlapStart	149	NA
chr1	34396339	34396598	260	-0.811658	0.695436	0.875971	0.922213	1.75139	0.00016473	3.43902	1.14343e-08	62.9262	31.0842	58.0505	32.9209	19.824	36.5954	26.6009	3.58629	5.51847	7.34182	8.17097	11.314	ENSMUSG00000102839	downstream	6097	NA
chr1	34399760	34399998	239	-0.218859	0.964252	-0.122131	0.995219	0.499055	0.195485	0.595783	0.189797	54.1018	48.122	39.8454	36.6275	37.7403	47.1833	41.9105	30.431	31.8178	30.3503	30.2223	23.2487	ENSMUSG00000101206	upstream	6454	Gm5266
chr1	34409552	34410160	609	-0.460919	0.743387	-0.35159	0.939354	0.00991126	0.983011	0.11924	0.797546	30.3315	38.281	36.8801	27.7904	25.3904	28.354	21.5386	33.3778	31.806	24.9188	28.9539	21.468	ENSMUSG00000101206	downstream	1468	Gm5266
chr1	34433165	34433486	322	-0.373769	0.926791	-0.966672	0.477054	-0.112451	0.854996	-0.705355	0.14919	22.1269	31.8565	17.8564	18.1242	16.5786	18.605	21.479	37.6449	40.9943	24.6019	16.8241	18.2711	ENSMUSG00000101462	downstream	20645	NA
chr1	34434853	34435162	310	-0.0896616	0.985118	-0.338958	0.94071	0.324816	0.280358	0.0755196	0.879281	74.9091	62.1684	73.6108	79.0681	61.1621	67.0697	55.3914	63.165	69.4259	54.8031	55.8525	44.2829	ENSMUSG00000101462	downstream	18969	NA
chr1	34439214	34440166	953	-0.0146419	0.995667	0.00472981	0.999855	-0.0470552	0.865451	-0.0276835	0.94075	88.8844	107.474	99.927	95.9395	103.533	89.117	102.604	106.648	95.3022	108.163	111.35	81.6267	ENSMUSG00000101462	downstream	13965	NA
chr1	34459523	34459898	376	0.15138	0.97301	-0.0614751	0.996879	0.0731131	0.87291	-0.139742	0.790358	35.091	42.9888	46.8315	39.3204	41.6139	50.6107	55.817	35.2143	56.4762	45.1834	39.2685	49.5491	ENSMUSG00000101462	upstream	2456	NA
chr1	34579599	34579797	199	-1.01375	0.797765	0.212756	0.99616	0.216643	0.83374	1.44315	0.0906316	38.4555	13.2772	30.6991	16.6184	7.40021	15.9377	14.3813	12.1826	7.93107	5.75539	9.60807	22.9945	ENSMUSG00000101803	upstream	1958	Gm28419
chr1	34677853	34678245	393	-0.204577	0.97301	-0.0299	0.998184	1.01755	0.0156411	1.19222	0.0175132	30.8872	25.3103	26.5177	13.8598	24.3567	30.4876	27.9149	9.96497	13.8734	10.2001	9.73032	17.4653	ENSMUSG00000104098	upstream	2583	NA
chr1	34801577	34802232	656	-0.180342	0.95596	-0.0871061	0.995219	0.267731	0.379131	0.360967	0.306841	39.4217	52.1229	39.442	29.6544	41.5303	41.3641	42.8992	35.8192	32.5893	32.8815	28.6607	35.8738	ENSMUSG00000102612	downstream	9019	NA
chr1	34842433	34843650	1218	0.212925	0.902466	0.222949	0.97185	0.169084	0.497114	0.179108	0.572827	33.3647	36.6222	43.6661	47.9144	41.2593	41.0844	45.6226	34.2965	32.8662	43.7254	39.0704	33.5437	ENSMUSG00000118272	downstream	1388	NA
chr1	34849864	34850765	902	0.0303257	0.995667	0.0712641	0.996879	-0.0701403	0.870499	-0.029202	0.960115	28.6703	19.1261	19.1234	21.9981	20.6121	27.3481	20.8878	21.0884	23.8603	27.0882	18.8421	25.3653	ENSMUSG00000104002	inside	224	NA
chr1	34860224	34860509	286	-0.101062	0.98981	0.0573677	0.996879	-1.14541	0.000995376	-0.986983	0.0210942	17.5308	30.9755	20.1041	25.847	23.8146	18.4825	17.5115	45.6437	46.6561	48.723	41.2263	55.9988	ENSMUSG00000104358	upstream	2097	NA
chr1	34867323	34867502	180	0.023496	0.998874	0.164105	0.995219	-0.174891	0.819499	-0.0342821	0.975455	20.5243	26.7669	40.9271	41.068	12.272	23.4933	43.7233	37.2974	23.9134	39.2379	31.2767	30.8692	ENSMUSG00000104358	downstream	1682	NA
chr1	35201537	35201847	311	-0.576785	0.902466	-0.171005	0.99616	0.719694	0.269754	1.12547	0.114961	28.8491	13.9929	31.1985	11.2591	13.0217	19.263	23.0055	11.3931	11.0724	7.05853	6.14793	19.9683	ENSMUSG00000077231	downstream	16190	Gm25096
chr1	35213922	35214091	170	-0.831308	NA	-0.768036	0.978771	2.18726	0.00588981	2.25053	0.010823	46.5678	20.1133	33.8221	16.0203	8.66259	31.0941	21.0433	10.9698	3.376	1.6843	3.74903	9.61323	ENSMUSG00000077231	downstream	3946	Gm25096
chr1	35216508	35216730	223	-0.191505	0.982364	-0.378561	0.978918	-1.01874	0.0388595	-1.2058	0.0336225	18.9334	27.8782	23.3665	10.4681	36.3207	25.2843	10.6946	44.3221	64.3409	49.2198	37.6304	38.1081	ENSMUSG00000077231	downstream	1307	Gm25096
chr1	35266306	35266862	557	-0.318197	0.959043	-0.307541	0.983677	-0.223797	0.723018	-0.213141	0.782827	7.58016	15.0677	12.5808	12.2238	7.60115	6.95943	11.1324	14.0619	13.6525	11.652	7.8189	15.2569	ENSMUSG00000077231	upstream	48141	Gm25096
chr1	35363437	35363593	157	-0.259795	0.979184	-0.745044	0.956385	-0.00958072	0.99294	-0.49483	0.604495	26.8927	25.7385	21.7447	12.3906	15.2423	49.3809	10.6333	27.3198	42.0388	13.3743	22.327	29.1459	ENSMUSG00000077231	upstream	145272	Gm25096
chr1	35380610	35381301	692	-0.018231	0.997399	0.0594786	0.996879	-0.53288	0.099732	-0.45517	0.279707	26.3122	39.0798	21.8109	29.5172	34.8475	30.5549	20.3337	34.7642	45.2004	38.7567	50.9623	34.4798	ENSMUSG00000077231	upstream	162445	Gm25096
chr1	35385594	35385716	123	0.829623	NA	0.16054	0.996879	1.18149	0.105994	0.512403	0.666355	2.1454	24.0081	26.2946	36.376	22.4488	37.2456	34.9011	16.6777	9.33205	16.2953	14.6812	10.6293	ENSMUSG00000077231	upstream	167429	Gm25096
chr1	35527867	35528444	578	-0.28733	0.931075	-0.29196	0.974375	-0.936812	0.00158359	-0.941442	0.00779697	33.7845	33.6118	30.4648	18.5109	27.7076	16.4616	43.3244	61.6247	63.5483	51.1895	51.2735	50.8936	ENSMUSG00000104417	downstream	136243	NA
chr1	35529324	35529703	380	-0.562854	0.887848	-0.395841	0.978771	-0.952497	0.0566762	-0.785484	0.207902	17.3608	33.5382	12.7667	12.7982	15.5015	4.63685	23.8491	27.9731	45.6871	27.1261	27.3943	30.1046	ENSMUSG00000104417	downstream	134984	NA
chr1	35630700	35631022	323	0.102016	0.992375	-0.0106613	0.999855	0.63556	0.351262	0.522883	0.565437	18.7905	10.1048	12.7946	21.6817	11.9681	4.36409	19.1974	9.23776	9.77265	10.6377	10.5236	6.07152	ENSMUSG00000104417	downstream	33665	NA
chr1	35759775	35760098	324	-0.333931	0.954675	-0.371275	0.983677	1.52572	0.00145543	1.48838	0.00923945	35.0217	21.1066	41.5926	24.6168	18.7489	16.3148	42.6928	12.0871	11.071	6.48074	9.50758	12.1056	ENSMUSG00000064601	upstream	40585	Gm25634
chr1	35824758	35824978	221	-0.0181404	0.998874	-0.0240937	0.998688	-1.11891	0.0299391	-1.12486	0.0729124	17.9107	23.2077	11.3824	14.964	29.153	6.37828	16.1871	32.9095	43.4985	27.6398	38.9323	48.8056	ENSMUSG00000101714	upstream	21077	NA
chr1	35849746	35849942	197	0.724773	0.810717	0.173595	0.995219	0.381297	0.525299	-0.16988	0.85628	16.0742	27.6129	17.3295	39.499	25.2293	37.5655	35.1078	20.826	25.4914	22.7708	17.7936	43.1376	ENSMUSG00000101714	downstream	203	NA
chr1	35869423	35870069	647	-0.0450058	0.991241	-0.0287412	0.996879	-0.147718	0.586413	-0.131454	0.706694	57.9159	49.9653	57.2088	51.715	56.0491	51.1988	53.4484	59.6644	60.5411	68.3005	56.3128	50.0126	ENSMUSG00000101714	downstream	19880	NA
chr1	35879444	35880166	723	-0.259176	0.826277	0.029016	0.996879	-0.102653	0.680819	0.185539	0.503781	82.1216	75.0234	89.2187	69.4183	60.3416	70.675	74.5489	71.4481	72.8316	77.3582	69.7866	73.6882	ENSMUSG00000101714	downstream	29901	NA
chr1	35901874	35902745	872	0.129716	0.98248	-1.09555	0.302761	1.89611	3.21664e-08	0.670845	0.150421	23.3017	13.7241	21.6358	22.3088	14.566	27.8849	21.0594	15.1842	9.37887	5.58214	6.57801	4.49793	ENSMUSG00000102531	upstream	16181	NA
chr1	35933523	35934085	563	0.13973	0.977472	0.277514	0.978771	-0.376644	0.289755	-0.23886	0.638646	21.5607	22.0847	29.9999	28.6789	26.811	19.4039	32.6177	21.5305	36.1886	32.2101	39.0552	34.2525	ENSMUSG00000102531	downstream	13323	NA
chr1	35935043	35935827	785	0.0912079	0.985118	0.265284	0.974375	-0.839239	0.000803917	-0.665163	0.0391789	25.548	19.6009	27.9248	23.79	27.4361	18.4056	32.8115	33.0213	43.6838	47.1747	44.2481	47.4661	ENSMUSG00000102531	downstream	14843	NA
chr1	35973338	35973847	510	0.128798	0.981524	0.135282	0.99334	-0.464281	0.186447	-0.457796	0.306007	21.2142	16.1516	19.7296	17.1646	24.905	20.7294	19.6404	22.671	28.9774	31.066	24.1604	30.7623	ENSMUSG00000103096	upstream	24153	Gm8022
chr1	36006702	36007394	693	-0.413599	0.911073	0.509621	0.973622	1.30236	0.00185789	2.22558	5.70813e-06	30.082	21.5302	43.2995	22.4569	20.4533	31.0194	21.681	7.80394	5.79718	8.53897	4.59838	17.9225	ENSMUSG00000103096	downstream	7799	Gm8022
chr1	36015752	36016011	260	0.18252	NA	-0.137931	0.996879	-1.24958	0.0695406	-1.57003	0.0511806	10.1494	5.37996	4.14646	14.2158	6.372	5.42154	1.83454	16.4969	20.9702	15.7849	17.9761	17.5996	ENSMUSG00000102279	downstream	5030	NA
chr1	36017126	36017436	311	-0.177731	0.980806	-0.0569029	0.996879	0.0139702	0.98537	0.134798	0.874769	17.8185	24.4875	20.799	21.8927	17.165	18.1299	17.6376	13.7917	24.4516	24.8583	12.6374	17.8664	ENSMUSG00000102279	downstream	3605	NA
chr1	36030197	36030805	609	-0.349573	0.866532	0.242564	0.978771	-0.798521	0.00295493	-0.206383	0.648166	48.0971	51.807	55.7628	35.1373	56.2215	35.8765	34.8533	53.2821	66.4391	78.0475	84.0711	47.7662	ENSMUSG00000102279	upstream	4743	NA
chr1	36064743	36065199	457	0.209408	0.913141	0.220514	0.974375	0.230632	0.351502	0.241738	0.446154	68.1364	64.9571	65.6599	66.405	73.3098	86.365	81.9322	54.6812	57.1409	62.0279	66.9412	67.2295	ENSMUSG00000102434	downstream	3529	NA
chr1	36068144	36068726	583	-0.121427	0.969471	-0.0813179	0.995158	0.2842	0.246157	0.324309	0.275128	59.7474	67.98	85.3711	62.3972	59.0446	68.9085	72.8153	56.298	57.589	56.8078	52.1092	52.139	ENSMUSG00000102434	downstream	2	NA
chr1	36073254	36073581	328	-0.109367	0.985118	-0.437885	0.937729	0.285623	0.485927	-0.0428949	0.949489	53.0986	46.9106	49.3024	43.2954	35.9181	52.6452	53.8058	57.993	44.6188	40.1562	24.9364	51.8177	ENSMUSG00000102434	upstream	3155	NA
chr1	36089626	36089996	371	-0.0279095	0.998793	-0.809025	0.94071	0.768954	0.28547	-0.0121613	0.992477	14.9368	8.37849	13.0764	17.8278	7.44259	8.54879	12.8566	15.0798	9.28174	4.37343	4.0084	14.977	ENSMUSG00000045216	upstream	17485	Hs6st1
chr1	36130457	36130644	188	-0.711561	0.866532	-0.499116	0.982515	1.29979	0.042808	1.51223	0.0374023	43.5128	33.0683	43.9643	14.4865	13.7081	22.4936	48.2056	16.8632	11.4479	9.6459	5.65014	17.3856	ENSMUSG00000104523	downstream	13821	NA
chr1	36243870	36244527	658	0.046461	0.991241	-0.126853	0.989596	0.133622	0.65727	-0.0396915	0.930874	51.3331	56.4523	64.4445	57.9459	49.517	68.0165	63.7908	54.6991	63.454	59.616	45.2011	58.6144	ENSMUSG00000037470	inside	39274	Uggt1
chr1	36252928	36253093	166	0.1378	0.98866	-0.0617361	0.996879	1.15771	0.0181074	0.958176	0.134847	31.7933	33.7058	45.4612	56.2504	28.8318	36.0892	41.664	13.481	24.2015	20.6986	19.8368	11.8139	ENSMUSG00000037470	inside	30708	Uggt1
chr1	36270754	36271414	661	0.502918	0.776209	0.541603	0.875417	0.883578	0.00376509	0.922264	0.0213733	22.7555	18.105	19.0281	34.4332	27.5702	29.3223	20.9266	9.31025	11.5045	15.8832	17.1949	11.373	ENSMUSG00000037470	inside	12387	Uggt1
chr1	36273189	36273663	475	-0.110827	0.979111	-0.0976858	0.995158	0.276345	0.382101	0.289486	0.460228	57.2212	65.4404	38.2056	49.5546	51.5424	47.4813	49.7065	40.4383	47.1219	43.4017	37.3456	42.6625	ENSMUSG00000037470	inside	10138	Uggt1
chr1	36279354	36279556	203	-0.114635	0.990105	0.337615	0.986975	0.295825	0.647144	0.748075	0.273358	31.1981	20.6718	23.8983	29.7069	19.0428	26.0394	17.6225	15.6172	14.136	18.3365	16.7445	22.5414	ENSMUSG00000037470	inside	4245	Uggt1
chr1	36303358	36303989	632	0.290754	0.86028	0.331958	0.919968	0.17156	0.550128	0.212764	0.552664	44.2591	45.9869	51.7433	64.9468	50.6803	56.3171	60	35.409	46.0862	48.6279	58.6577	46.0279	ENSMUSG00000047180	overlapEnd	311	Neurl3
chr1	36307525	36308563	1039	0.222595	0.902466	0.176091	0.978771	-0.121052	0.660408	-0.167556	0.613898	44.7003	48.6158	40.4669	60.101	52.2653	52.2326	43.3828	46.6667	53.4426	60.4446	61.239	46.558	ENSMUSG00000047180	inside	3847	Neurl3
chr1	36368507	36369324	818	0.451601	0.756679	0.348377	0.952959	0.453138	0.116107	0.349914	0.382531	20.6462	26.9802	37.5615	43.2823	32.8554	41.3575	39.3597	25.9897	19.119	25.9028	28.958	31.5662	ENSMUSG00000102762	upstream	2465	NA
chr1	36371018	36371135	118	0.419926	0.967337	-0.5646	0.978771	-0.0586477	0.957495	-1.04317	0.246126	15.6541	21.074	19.7953	9.89149	15.6	20.9051	56.591	39.51	38.9099	33.1626	27.0057	16.6195	ENSMUSG00000102762	upstream	654	NA
chr1	36441085	36441485	401	-0.267609	0.931075	0.0196026	0.998184	-0.188153	0.629637	0.0990581	0.856889	44.0904	37.9832	34.5021	38.3244	31.2156	35.1521	23.7896	32.5539	39.3587	35.9401	36.5554	37.494	ENSMUSG00000037432	inside	19706	Fer1l5
chr1	36444720	36445436	717	0.136536	0.972966	0.0508502	0.996879	0.423232	0.141578	0.337546	0.384044	27.2349	25.1448	32.3274	29.302	33.3758	33.4215	28.2729	20.5474	24.0134	26.3568	24.0001	17.3226	ENSMUSG00000037432	inside	15755	Fer1l5
chr1	36470021	36470336	316	-0.238397	0.959309	0.968402	0.581497	1.29401	0.000127906	2.50081	1.83155e-09	81.0024	54.5941	86.4284	62.1766	45.4375	65.7962	77.7359	15.934	10.4432	34.1302	17.1435	24.824	ENSMUSG00000001143	inside	11069	Lman2l
chr1	36471305	36471934	630	0.102019	0.980377	0.23068	0.978771	0.138231	0.689814	0.266892	0.490466	44.8184	68.0892	85.2767	73.7989	56.9772	72.7175	82.5253	56.8342	53.7481	66.962	70.6465	55.5126	ENSMUSG00000001143	inside	12353	Lman2l
chr1	36485189	36485298	110	-1.0354	NA	-1.38808	0.823121	0.680804	0.520102	0.328127	0.8001	33.5853	21.1938	26.1353	14.1478	5.02037	22.4255	13.0086	11.8674	30.0004	7.80902	9.6566	5.94273	ENSMUSG00000001143	upstream	837	Lman2l
chr1	36492400	36492741	342	-0.131373	0.980806	0.939041	0.530931	0.777029	0.0248205	1.84744	5.30106e-06	55.5546	34.538	51.4873	40.3854	43.0597	42.2468	45.3272	12.5415	13.425	18.9771	23.2944	36.3167	ENSMUSG00000001143	upstream	8048	Lman2l
chr1	36511573	36512648	1076	0.0235871	0.995667	0.0638616	0.995219	-0.0236261	0.940171	0.0166484	0.967832	43.899	66.155	62.7878	59.4807	58.6798	56.6591	60.7309	54.2477	60.2724	62.5351	60.1204	56.5001	ENSMUSG00000104316	upstream	385	NA
chr1	36536131	36536253	123	-0.518511	0.920262	0.690351	0.952959	-0.325044	0.653449	0.883819	0.234897	42.908	30.326	67.1974	52.1917	31.4283	22.9203	21.3284	28.807	22.1636	54.3175	31.9531	34.5451	ENSMUSG00000001138	upstream	14695	Cnnm3
chr1	36546972	36547630	659	-0.0174258	0.995667	-0.0430275	0.996879	0.00180152	0.996064	-0.0238001	0.954262	75.6815	84.6679	76.3436	79.9975	77.9338	75.9345	78.1699	68.7654	91.4441	82.5537	84.3011	64.4772	ENSMUSG00000001138	upstream	3318	Cnnm3
chr1	36548121	36548467	347	-0.170301	0.974413	-0.115092	0.995219	-0.505312	0.181338	-0.450103	0.345508	31.1794	32.2487	20.7124	25.2276	24.4025	32.498	18.5569	37.0825	39.2813	33.5565	31.8362	42.3869	ENSMUSG00000001138	upstream	2481	Cnnm3
chr1	36556582	36558387	1806	-0.0869741	0.981177	0.0995067	0.993049	-0.170316	0.550819	0.0161653	0.972908	50.5559	45.0945	31.837	45.671	41.9939	41.367	30.5046	37.5866	46.1584	47.3519	45.5828	41.4444	ENSMUSG00000001138	inside	5634	Cnnm3
chr1	36563021	36563441	421	-0.0783505	0.992365	0.132448	0.99616	0.157428	0.80225	0.368227	0.58642	29.4598	27.3186	26.4612	36.9658	11.3684	32.6452	24.9254	27.9066	15.3364	22.6707	18.4186	31.0546	ENSMUSG00000102845	downstream	3174	NA
chr1	36569763	36570723	961	0.0881339	0.97961	-0.123891	0.989573	-0.410541	0.0616636	-0.622566	0.0120953	34.3242	43.6667	33.468	43.9267	39.651	32.6364	41.4443	54.1414	60.617	56.1141	55.1562	45.5753	ENSMUSG00000102845	upstream	2445	NA
chr1	36571568	36572416	849	-0.0913196	0.978885	0.259816	0.956385	-0.361144	0.11005	-0.0100084	0.981955	42.8928	55.6513	56.0839	47.6593	52.9041	36.9418	55.6197	50.5207	53.7417	59.0199	62.8077	66.2169	ENSMUSG00000067653	inside	2299	Ankrd23
chr1	36580085	36581126	1042	-0.0770517	0.98866	0.00945918	0.999855	-0.613708	0.0163303	-0.527197	0.104906	25.8313	31.7703	18.4508	26.8836	26.4991	24.3501	18.3102	34.0044	39.1059	37.2798	34.1503	39.5231	ENSMUSG00000109510	upstream	1575	NA
chr1	36588609	36589733	1125	0.00983416	0.998874	0.173491	0.989573	-0.382396	0.246994	-0.21874	0.647152	22.2836	23.2095	13.4161	26.2835	19.1443	19.4212	13.7795	21.7154	23.8496	26.8091	23.0385	27.6007	ENSMUSG00000079610	upstream	2083	Ankrd39
chr1	36596138	36596375	238	-0.045516	0.995667	-0.266162	0.983216	-0.661391	0.0870111	-0.882037	0.0427208	25.5014	36.5696	24.1587	22.8862	35.5785	25.1714	28.0577	47.0136	59.6829	46.1177	43.2924	43.9462	ENSMUSG00000087589	upstream	407	NA
chr1	36636158	36636895	738	-0.305033	0.934968	0.217964	0.986975	-0.589538	0.107391	-0.0665402	0.922984	12.8724	17.4796	12.1734	9.75299	9.22895	13.3702	14.5421	12.6346	17.1088	16.5539	17.9916	17.7154	ENSMUSG00000089906	upstream	3988	NA
chr1	36664601	36664698	98	0.375365	0.967337	0.402791	0.987259	0.330556	0.690641	0.357982	0.74408	32.3124	23.7889	31.169	35.7305	22.5404	39.5551	53.5387	24.7381	20.4972	15.5826	30.3493	50.028	ENSMUSG00000089906	downstream	23374	NA
chr1	36684205	36684438	234	-0.162088	0.980806	-0.0471107	0.996879	0.114416	0.855303	0.229393	0.744585	36.0867	37.859	43.7682	54.8682	27.5333	31.6257	25.4798	25.5025	41.0819	26.5121	36.7694	34.9199	ENSMUSG00000046337	inside	37826	Fam178b
chr1	36691272	36691893	622	0.107357	0.97802	0.148958	0.989573	-0.00515904	0.989945	0.0364418	0.942495	40.3039	51.4738	64.419	67.8675	45.5761	48.7241	62.8818	49.4701	52.594	56.7751	55.5022	57.803	ENSMUSG00000046337	inside	30371	Fam178b
chr1	36709165	36710260	1096	0.206018	0.926791	0.429794	0.790706	0.0690881	0.834853	0.292863	0.365552	38.0417	45.3784	43.4445	51.2955	45.3482	63.6635	36.557	35.2216	34.0373	42.9322	47.6839	49.8029	ENSMUSG00000046337	inside	12004	Fam178b
chr1	36914593	36914702	110	-0.992865	NA	0.0357282	0.998714	-0.862203	0.362552	0.16639	0.91145	35.9842	11.3033	19.6015	10.6109	15.0611	0	15.1767	20.3441	18.2611	19.0887	15.4506	26.7423	ENSMUSG00000103016	upstream	3467	NA
chr1	36939111	36940223	1113	0.35516	0.757894	0.307131	0.92906	0.231892	0.354796	0.183863	0.591066	38.8832	40.0771	52.9515	66.4172	46.3095	59.2083	53.7836	38.3698	39.1896	45.0206	53.0636	45.5182	ENSMUSG00000102930	downstream	12459	NA
chr1	37012978	37013363	386	0.476645	0.901237	-0.311586	0.983547	-0.152277	0.808495	-0.940508	0.0780836	21.1928	13.6899	9.77534	24.1906	23.8446	20.9979	11.7392	28.5045	27.5066	16.0721	23.1158	30.4834	ENSMUSG00000080054	upstream	15470	NA
chr1	37018928	37019267	340	-0.348033	0.962039	-1.0679	0.660987	-0.095246	0.906575	-0.815111	0.194918	10.0897	14.6279	15.8541	7.43801	9.74542	8.29177	17.5361	24.1336	24.054	9.82508	9.99742	16.3425	ENSMUSG00000080054	upstream	21420	NA
chr1	37028952	37030082	1131	-0.205787	0.90908	-0.031282	0.996879	-0.383042	0.0643336	-0.208537	0.485197	56.4633	56.3418	64.6594	40.9361	49.6414	52.6575	62.6275	63.9762	72.6916	67.4266	61.3292	72.826	ENSMUSG00000119706	upstream	14438	NA
chr1	37299636	37300421	786	0.212999	0.940885	0.197767	0.983547	0.425503	0.133789	0.41027	0.262984	36.2589	31.4401	49.6063	35.6396	43.7951	57.8367	45.5135	32.742	26.2864	30.236	34.0561	37.8414	ENSMUSG00000102231	downstream	38012	NA
chr1	37429624	37430695	1072	0.215532	0.90908	-0.0602172	0.99616	0.383048	0.0814129	0.1073	0.771272	41.1088	37.1155	47.7694	51.7181	48.2523	46.6799	48.0541	35.4882	42.2945	35.1681	44.0943	31.7093	ENSMUSG00000026112	downstream	25470	Coa5
chr1	37477864	37478161	298	-0.489182	0.947881	-0.641119	0.974375	0.299818	0.747234	0.147881	0.904067	11.5117	11.9956	15.6768	11.7503	1.85316	11.8255	12.8049	13.1417	10.5925	8.64758	5.70323	8.77449	ENSMUSG00000026111	inside	44	Unc50
chr1	37491709	37492102	394	0.0683091	0.992829	-0.441724	0.956385	-0.809088	0.0333219	-1.31912	0.00169133	22.102	35.5023	12.3131	22.7119	21.9588	19.6772	33.8971	63.8979	53.532	42.877	38.0137	49.7741	ENSMUSG00000026111	downstream	13504	Unc50
chr1	37512091	37512686	596	0.207285	0.961436	0.479532	0.871511	-0.159593	0.692001	0.112654	0.842185	22.5807	25.5558	18.993	20.563	28.7239	31.9289	23.2088	21.2771	20.222	26.1029	33.6847	26.3235	ENSMUSG00000103948	downstream	12246	4930594C11Rik
chr1	37518018	37518998	981	0.178962	0.961417	-0.107548	0.993367	-0.150125	0.661722	-0.436635	0.200197	28.2445	28.8345	20.8802	29.9433	36.5908	29.0973	21.3937	33.4574	36.711	36.1927	32.7005	27.9871	ENSMUSG00000103948	downstream	5934	4930594C11Rik
chr1	37540798	37541554	757	-0.103674	0.972938	0.0893858	0.993049	0.135071	0.609512	0.32813	0.229114	53.3346	59.3351	71.4448	50.6247	60.3063	60.5179	58.2837	46.8066	51.1752	53.9628	52.3395	49.6536	ENSMUSG00000087233	upstream	12735	NA
chr1	37585802	37586554	753	0.0286201	0.995667	-0.111398	0.993367	-0.682984	0.00976149	-0.823002	0.00786186	19.2744	22.4979	17.6578	20.6675	25.6685	15.4438	18.0531	35.6629	34.6791	30.547	31.8809	36.0273	ENSMUSG00000026110	upstream	5705	Mgat4a
chr1	37639182	37639435	254	-0.034014	0.995667	-0.065179	0.996879	0.211846	0.702664	0.180681	0.801833	33.2453	19.5806	47.3959	29.1033	31.8879	34.6851	34.7408	32.3049	26.5495	25.9276	31.7831	25.7362	ENSMUSG00000089767	upstream	13905	NA
chr1	37719402	37719974	573	0.0217346	0.998626	-0.147848	0.995219	0.818368	0.0866139	0.648786	0.302776	17.5002	10.0359	14.111	13.9194	14.7778	17.8353	9.57292	11.7165	6.00964	6.99587	6.48829	11.4084	ENSMUSG00000102650	downstream	13554	NA
chr1	37864556	37865486	931	0.278298	0.822094	0.0766818	0.995158	0.157726	0.515746	-0.0438902	0.910149	122.163	114.688	167.907	138.325	178.742	162.384	175.474	146.225	132.23	146.087	159.391	133.759	ENSMUSG00000097268	upstream	38894	NA
chr1	37871768	37872675	908	-0.207021	0.933144	-0.310265	0.94071	0.164346	0.595448	0.061102	0.892922	26.4465	28.0716	36.0152	27.8516	25.9496	26.3912	24.6896	29.9858	28.1272	22.5995	25.2688	21.958	ENSMUSG00000097268	upstream	31705	NA
chr1	37890087	37890742	656	0.0225275	0.995667	0.0484712	0.996879	0.11926	0.704242	0.145204	0.705285	39.824	42.8829	59.1629	48.3366	47.7037	49.422	47.6254	44.6318	41.338	45.9759	46.6343	39.3615	ENSMUSG00000097268	upstream	13638	NA
chr1	37996847	37998641	1795	0.165406	0.920262	0.0267158	0.996879	0.0244132	0.930543	-0.114277	0.690829	58.6573	58.5318	62.2624	74.1283	65.1203	71.069	58.1944	70.0236	59.6302	73.2709	65.9231	57.7222	ENSMUSG00000026085	upstream	7	Lyg1
chr1	38129153	38130272	1120	0.285499	0.887848	0.287292	0.968261	0.525844	0.0398321	0.527637	0.102782	46.8866	52.3158	94.332	77.6394	72.8103	82.7511	82.407	47.7873	42.0192	59.2262	57.474	46.6928	ENSMUSG00000103804	upstream	12767	NA
chr1	38241712	38242165	454	0.050912	0.994412	0.237146	0.986975	-0.348263	0.438614	-0.162029	0.809156	18.5998	17.1168	25.7251	31.2795	23.1114	14.748	14.1834	23.8244	22.1225	27.1194	27.8425	25.9176	ENSMUSG00000085391	upstream	32336	NA
chr1	38262437	38262737	301	0.373414	0.919888	0.168298	0.993367	0.356792	0.441743	0.151676	0.833115	26.3008	30.9809	26.2655	40.0698	30.5781	44.4891	30.9008	17.3476	32.4141	35.5139	27.1732	19.5458	ENSMUSG00000085391	upstream	11764	NA
chr1	38291996	38292264	269	-0.398731	0.930568	-0.0563312	0.996879	-0.154978	0.812044	0.187422	0.806113	25.5055	17.911	23.3784	15.9097	17.7921	18.3405	15.0719	20.1046	18.6684	17.3856	18.5593	20.6559	ENSMUSG00000085391	downstream	6249	NA
chr1	38308068	38308878	811	-0.0564629	0.993288	0.00535808	0.999855	-0.712681	0.0454941	-0.65086	0.145329	12.0391	12.84	9.0837	9.5947	12.4839	10.4286	10.8806	18.3958	17.161	23.3019	12.9668	16.9269	ENSMUSG00000085391	downstream	22321	NA
chr1	38334151	38334981	831	-0.464849	0.718743	-0.233336	0.974375	-0.870293	0.000191841	-0.63878	0.0275864	32.7077	41.1463	26.1628	22.9413	22.8162	26.7163	24.9683	52.5126	51.6252	49.3872	46.4005	35.3989	ENSMUSG00000085280	upstream	12002	NA
chr1	38357944	38359006	1063	-0.115333	0.974705	0.0403909	0.996879	-0.872478	5.60174e-05	-0.716754	0.00741105	23.5833	22.0777	18.9315	16.1043	22.1658	18.8963	21.9869	34.7361	35.7688	38.0697	38.372	31.3628	ENSMUSG00000085280	downstream	6933	NA
chr1	38437823	38437929	107	0.282517	NA	-0.72891	0.974375	1.08395	0.183884	0.072524	0.961159	24.6621	13.0728	28.5473	14.5445	15.4834	39.5215	40.1199	24.4002	17.4322	16.9479	11.9128	6.10934	ENSMUSG00000087131	downstream	4768	NA
chr1	38627041	38628125	1085	0.066842	0.990105	0.0921486	0.995219	0.364292	0.255288	0.389599	0.332489	20.673	26.3571	38.9169	26.8939	25.7882	41.2487	27.9155	23.5472	20.4972	24.5426	21.0487	25.0033	ENSMUSG00000037138	inside	75911	Aff3
chr1	38735524	38736140	617	-0.279583	0.921705	-0.42537	0.926317	0.411864	0.221031	0.266077	0.558425	36.7813	36.0214	25.627	23.3313	27.4479	23.9883	32.8553	32.6428	22.0918	19.1815	19.9705	22.2491	ENSMUSG00000119889	upstream	6826	NA
chr1	38743947	38744351	405	-0.0709721	0.993015	-0.125305	0.996879	1.97184	8.98833e-06	1.91751	0.000399492	29.972	34.1542	14.6406	21.6147	27.7256	27.844	22.9658	5.98601	7.79399	8.01255	3.67189	8.07037	ENSMUSG00000119889	upstream	15249	NA
chr1	38816453	38816958	506	-0.0601344	0.994612	-0.478138	0.97349	0.0401721	0.957397	-0.377832	0.584204	9.9087	8.90753	9.94277	9.61129	8.73107	11.1431	7.54121	15.1106	9.92452	8.11082	10.0765	8.39733	ENSMUSG00000103531	downstream	9686	NA
chr1	38835979	38836259	281	0.3944	0.936444	-0.106272	0.996879	1.10514	0.0205104	0.604466	0.387379	24.4163	22.124	16.6252	26.3069	26.2036	33.8605	24.6129	19.9097	8.16969	9.5104	11.7185	19.7738	ENSMUSG00000103531	downstream	29212	NA
chr1	38897746	38898212	467	0.14108	0.979462	0.00602203	0.999855	0.0202556	0.971205	-0.114802	0.858883	17.5169	18.6372	25.7785	23.7438	16.9496	25.6565	26.045	25.1578	19.9705	20.2332	24.5654	23.0965	ENSMUSG00000048814	upstream	21954	Lonrf2
chr1	38987356	38988120	765	0.166596	0.940885	-0.0185315	0.996888	0.0932713	0.746964	-0.0918565	0.802784	55.1915	61.1526	77.2741	78.3216	77.4821	68.6374	65.468	72.8885	65.2694	70.2415	73.8698	58.5339	ENSMUSG00000067604	inside	1237	Nms
chr1	39078722	39079146	425	0.013441	0.998874	-0.425261	0.978771	1.17089	0.0171245	0.732187	0.269685	21.1107	17.1877	12.6833	10.9854	18.1914	22.3878	17.3958	8.33708	11.816	7.63549	4.49884	12.3049	ENSMUSG00000104188	downstream	8583	NA
chr1	39191661	39192029	369	-0.150557	0.977734	-0.16821	0.990735	-0.815338	0.0124956	-0.832991	0.031996	28.6053	26.9565	26.2946	30.0498	23.4465	13.3702	29.0842	52.0547	45.1049	43.454	36.559	51.3748	ENSMUSG00000098833	downstream	33948	Mir6349
chr1	39192612	39193965	1354	0.245077	0.901237	0.139579	0.988283	-0.152744	0.598004	-0.258243	0.437579	19.879	20.432	23.3557	29.1655	27.4625	23.9445	19.7274	23.4142	27.3397	28.76	28.7915	26.0707	ENSMUSG00000098833	downstream	32012	Mir6349
chr1	39196919	39197047	129	0.370929	0.967337	-0.849483	0.937132	0.900708	0.190832	-0.319703	0.762099	12.2737	38.554	29.2502	34.6841	29.9665	32.7814	44.3704	30.3584	37.8165	18.4968	30.4669	2.53372	ENSMUSG00000098833	downstream	28930	Mir6349
chr1	39217188	39217391	204	-0.641891	0.893435	0.270521	0.993049	0.150415	0.867936	1.06283	0.167789	59.5033	38.0934	15.8541	20.979	11.7306	46.6412	19.8742	21.9397	14.0667	23.8609	23.4315	16.0221	ENSMUSG00000098833	downstream	8586	Mir6349
chr1	39256635	39256762	128	-0.10897	0.991416	0.234858	0.995158	0.965366	0.118611	1.30919	0.0772212	41.2319	37.641	35.0938	53.1925	28.7625	24.7781	31.6745	7.28466	22.4188	16.4044	14.9376	25.5351	ENSMUSG00000026077	inside	23823	Npas2
chr1	39284784	39285323	540	-0.226573	0.948846	-0.111054	0.995158	-0.613838	0.0378845	-0.498319	0.187751	32.2525	39.4309	29.9467	36.745	33.4071	24.7985	19.8742	47.6578	48.3581	42.9496	51.5376	37.5272	ENSMUSG00000092553	downstream	30041	NA
chr1	39321967	39322167	201	-0.211239	0.978885	-0.142504	0.99616	-0.16774	0.818794	-0.0990048	0.919037	34.1343	34.0225	19.6665	30.0025	17.4006	21.0388	32.0361	20.4115	41.4022	21.368	36.9929	26.0179	ENSMUSG00000092553	upstream	6321	NA
chr1	39349197	39349373	177	-0.944766	NA	0.0962301	0.996879	0.884654	0.279246	1.92565	0.0221319	29.8174	25.4645	20.3028	18.6839	7.28	15.9277	10.7792	9.4824	4.05311	7.00998	4.80102	11.0797	ENSMUSG00000092563	upstream	4607	Gm3617
chr1	39367613	39368408	796	0.0195972	0.995667	0.0189286	0.996879	-0.0117611	0.972337	-0.0124296	0.977232	70.9437	75.9532	56.2064	57.1867	73.3083	72.6051	71.9067	75.9069	60.925	67.8657	70.993	68.5728	ENSMUSG00000092563	downstream	13079	Gm3617
chr1	39394346	39394455	110	-0.645909	NA	0.150375	0.996879	0.804676	0.45703	1.60096	0.166414	33.5853	21.1938	29.4022	22.9902	3.34691	22.4255	23.8491	13.5627	5.21746	7.80902	3.86264	23.7709	ENSMUSG00000073702	upstream	12468	Rpl31
chr1	39463745	39464021	277	-0.981892	0.810717	-0.390464	0.989573	-0.0644062	0.954705	0.527022	0.608531	18.1004	17.9548	14.2706	9.83197	13.9555	2.54441	6.02684	16.831	6.73373	8.26948	4.98518	15.3395	ENSMUSG00000102607	upstream	4732	NA
chr1	39478269	39479085	817	0.340156	0.751571	0.222038	0.973622	0.207627	0.387458	0.0895088	0.807604	52.6476	62.0162	80.0533	74.7653	88.3224	78.5029	88.1569	60.4885	61.9933	75.467	72.9387	64.8099	ENSMUSG00000102607	upstream	19256	NA
chr1	39503202	39503453	252	-0.361864	0.952372	-0.866092	0.713127	-0.906467	0.0602081	-1.4107	0.00437282	13.6131	15.4187	19.9644	13.1232	10.2267	8.39048	18.9278	40.7016	46.688	26.5121	21.919	23.3464	ENSMUSG00000003134	inside	14383	Tbc1d8
chr1	39535382	39536211	830	0.288753	0.876129	0.441233	0.819218	0.214662	0.467117	0.367142	0.275689	49.2796	49.8096	87.0257	77.3443	77.6241	75.575	73.2712	47.8576	48.5758	69.2254	71.4123	54.3437	ENSMUSG00000003134	upstream	17546	Tbc1d8
chr1	39555927	39556519	593	-0.307288	0.950484	-0.151008	0.995219	1.48458	0.00033491	1.64086	0.000859011	25.8099	16.5118	26.0581	14.1061	14.5898	27.9305	18.0979	7.54754	7.01674	5.15041	5.1947	11.0236	ENSMUSG00000065629	upstream	2095	Gm24826
chr1	39576620	39577727	1108	0.0745591	0.985118	0.172074	0.983547	-0.0712032	0.83375	0.0263115	0.956114	38.106	49.2353	62.4339	64.7857	55.1576	45.7993	44.5556	50.9979	47.5246	58.3171	54.9328	52.8034	ENSMUSG00000003135	inside	2547	Cnot11
chr1	39685974	39686117	144	0.0290875	0.996813	-0.152132	0.995158	0.0697908	0.919941	-0.111429	0.893538	31.153	36.6966	42.4244	37.8258	35.7934	44.05	34.7799	33.6713	45.834	37.117	30.2439	43.126	ENSMUSG00000097083	upstream	3227	NA
chr1	39687220	39687838	619	-0.179398	0.966557	-0.442403	0.877069	-0.261762	0.452692	-0.524766	0.148741	37.0887	54.2341	35.1232	32.0555	33.0095	31.3118	53.1692	52.12	69.5381	44.4067	45.3033	44.8825	ENSMUSG00000097083	upstream	1506	NA
chr1	39713798	39714991	1194	0.0958689	0.975872	0.191185	0.978743	-0.339501	0.130334	-0.244185	0.429407	47.2958	49.7243	33.8593	45.4561	54.2682	42.2054	43.7433	47.4808	55.6376	62.8297	59.6057	53.6538	ENSMUSG00000050967	upstream	23156	Creg2
chr1	39736435	39736532	98	0.434876	NA	-0.544116	0.983547	1.187	0.133037	0.208003	0.881772	32.3124	15.8593	18.3347	33.7455	24.4188	32.3633	26.7694	24.7381	13.1768	6.8174	10.839	26.6816	ENSMUSG00000057173	inside	23625	Rfx8
chr1	39754581	39754914	334	0.0948264	0.988479	-0.534929	0.814247	-0.204269	0.612601	-0.834024	0.0194356	33.183	41.8799	31.2019	36.1108	36.9262	29.5425	48.555	55.2761	71.3105	44.2927	38.1638	50.8868	ENSMUSG00000057173	inside	5243	Rfx8
chr1	39758216	39758608	393	-0.103321	0.985118	-0.0526999	0.996879	-0.0204397	0.968445	0.0301817	0.962751	40.2877	62.8802	46.6345	45.0444	52.9289	26.9008	60.0778	48.8758	49.6522	40.0717	49.1921	54.8908	ENSMUSG00000057173	inside	1549	Rfx8
chr1	39761777	39762316	540	0.051163	0.992866	0.190895	0.986975	-0.200217	0.5983	-0.0604847	0.918866	36.1619	41.1578	23.2919	43.95	32.0436	29.3667	32.682	36.2614	33.7444	41.5356	34.424	44.7905	ENSMUSG00000057173	upstream	1620	Rfx8
chr1	39770402	39770826	425	0.114796	0.985118	0.135671	0.993049	-0.677733	0.0381392	-0.656858	0.109384	19.8689	19.0162	17.3338	18.309	25.1215	18.2419	18.5181	30.2767	28.696	30.3174	34.4911	32.3005	ENSMUSG00000057173	upstream	10245	Rfx8
chr1	39847170	39847302	133	-0.470359	NA	-0.732668	0.969459	-0.197814	0.85362	-0.460123	0.669499	13.8886	17.5287	24.3176	16.0892	4.15218	13.2481	21.518	28.0432	23.7336	17.9405	11.98	17.2026	ENSMUSG00000091937	upstream	2678	Gm3646
chr1	39869195	39870223	1029	0.0415069	0.994031	-0.0837565	0.99616	-0.343483	0.282523	-0.468746	0.206006	17.6949	13.8958	15.5408	19.4722	12.1647	15.7536	16.9192	20.1167	23.007	18.6435	18.7877	24.7758	ENSMUSG00000101634	downstream	8112	1700066B17Rik
chr1	39877754	39878307	554	-0.534428	0.857177	-0.776845	0.749851	-0.213684	0.706503	-0.456101	0.415401	15.2424	14.8688	13.622	11.5877	10.3005	8.90542	9.04026	16.1577	23.568	15.333	9.77862	8.84973	ENSMUSG00000101634	downstream	28	1700066B17Rik
chr1	39888842	39889865	1024	-0.255055	0.926791	-0.182739	0.98547	-0.334839	0.285789	-0.262523	0.522429	23.1929	16.2403	23.6883	17.6675	15.9991	13.4215	22.5914	24.2215	25.9217	21.8104	20.7466	24.2584	ENSMUSG00000101634	upstream	2348	1700066B17Rik
chr1	39900297	39901654	1358	0.22311	0.920262	0.195844	0.978918	0.205168	0.473745	0.177902	0.640576	26.4273	29.9855	34.4012	45.6965	34.5659	26.2094	34.2457	25.4051	28.21	30.2215	33.3999	28.1601	ENSMUSG00000101634	upstream	13803	1700066B17Rik
chr1	39932349	39932700	352	0.141429	0.982364	-0.442816	0.96145	0.86791	0.022965	0.283665	0.640998	44.2306	37.5306	27.0541	44.212	36.6068	38.0432	39.9743	23.8407	35.0548	23.3186	12.6743	32.4993	ENSMUSG00000026074	upstream	7373	Map4k4
chr1	39936320	39936824	505	-0.409665	0.832824	-0.0984374	0.995219	-0.144705	0.727494	0.166522	0.739016	37.1006	49.55	32.0222	35.4396	29.5257	26.5172	27.391	28.0654	42.3338	33.0745	34.0754	31.7142	ENSMUSG00000026074	upstream	3249	Map4k4
chr1	39965540	39965649	110	0.318459	NA	-0.401834	0.986975	0.705546	0.330779	-0.0147467	0.990962	16.7926	25.4325	34.3025	37.138	15.0611	35.24	43.3619	30.5161	22.1742	24.2947	18.3475	14.8568	ENSMUSG00000026074	inside	25467	Map4k4
chr1	40015053	40015273	221	-0.746627	0.856417	0.117822	0.996879	1.21064	0.0598801	2.07509	0.00374656	42.9857	18.2848	45.5298	22.006	15.8259	20.7294	25.8994	7.5945	9.08924	11.6605	2.88387	14.7896	ENSMUSG00000102985	downstream	72926	NA
chr1	40106716	40106866	151	-0.256978	NA	-0.177632	0.995624	-0.872987	0.202513	-0.793641	0.343497	20.9709	15.4392	9.51947	11.5947	17.067	9.33511	11.0559	28.4053	23.755	23.3868	18.9934	28.1394	ENSMUSG00000026073	upstream	6373	Il1r2
chr1	40117251	40118127	877	0.161182	0.967519	0.183681	0.983677	-0.27466	0.38137	-0.252162	0.539078	21.3635	26.0512	15.7758	25.287	22.2491	20.0912	26.3781	27.0056	23.3953	28.0781	30.4012	26.8337	ENSMUSG00000026073	inside	4012	Il1r2
chr1	40122114	40122368	255	-0.126502	0.989454	-0.514731	0.959708	-0.235447	0.708102	-0.623676	0.317504	38.2891	27.4272	19.0249	22.8862	17.3252	22.1114	40.2161	31.4469	54.0161	25.0773	25.8267	42.2982	ENSMUSG00000097899	inside	2643	Gm16894
chr1	40139625	40140766	1142	0.0808869	0.984078	0.185536	0.978918	-0.251172	0.337663	-0.146523	0.69679	25.4179	27.083	19.9819	25.5516	21.922	26.2294	28.8194	25.6379	27.7663	29.5023	29.5786	32.6278	ENSMUSG00000102975	downstream	8884	NA
chr1	40171795	40172457	663	-0.098148	0.981674	0.0215875	0.997135	-0.171692	0.602691	-0.0519565	0.918702	43.7817	43.3678	45.8008	31.6886	51.3647	43.0534	39.5686	36.2848	55.1847	45.4905	46.4624	48.3127	ENSMUSG00000102975	downstream	41054	NA
chr1	40174154	40174541	388	-0.471974	0.828545	-0.260437	0.983547	0.0646881	0.905036	0.276225	0.603765	65.971	44.4632	72.7056	36.0988	36.0569	36.3299	66.9987	37.4897	62.4952	42.3101	38.054	46.3318	ENSMUSG00000102975	downstream	43413	NA
chr1	40179455	40179994	540	0.292719	0.931075	0.149854	0.991388	0.0880321	0.85556	-0.0548333	0.933924	19.547	29.3573	20.9627	20.8942	33.4071	33.2822	28.2656	23.8289	24.9762	27.2191	31.8668	20.5794	ENSMUSG00000102975	downstream	48714	NA
chr1	40188012	40188579	568	0.0743037	0.993015	0.469322	0.973622	-0.811743	0.0860857	-0.416725	0.556665	8.82711	12.3133	10.4392	14.7269	13.9356	12.4085	3.35902	13.1329	15.1564	16.2993	18.3271	25.3194	ENSMUSG00000102975	downstream	57271	NA
chr1	40221950	40222118	169	0.0255957	0.998038	-0.416527	0.978743	-0.0749551	0.922707	-0.517078	0.451554	20.2988	29.4288	22.3271	21.8705	28.32	22.9373	25.4014	37.5181	32.2618	29.3673	19.4846	30.9444	ENSMUSG00000026072	upstream	42122	Il1r1
chr1	40224823	40225208	386	-0.054162	0.991903	0.0182945	0.998184	-0.247183	0.483403	-0.174727	0.715615	65.6292	59.9941	59.583	65.5162	56.2732	33.7793	79.085	59.9078	78.8026	74.4262	73.4752	61.8136	ENSMUSG00000026072	upstream	39032	Il1r1
chr1	40230189	40230674	486	0.248275	0.940885	0.228589	0.983547	0.143578	0.73216	0.123892	0.825224	27.6916	23.0253	24.401	32.0218	32.9526	24.6535	27.4804	22.6394	23.0277	27.1013	22.0751	32.954	ENSMUSG00000026072	upstream	33566	Il1r1
chr1	40240561	40241008	448	0.0737567	0.991241	-0.247046	0.980014	-1.07027	0.000623276	-1.39107	0.0001134	18.2598	22.203	15.2407	16.0663	26.7081	14.1589	20.2291	44.1242	53.4848	47.0827	38.4109	37.2084	ENSMUSG00000026072	upstream	23232	Il1r1
chr1	40266263	40266728	466	-0.000939763	0.999671	0.067553	0.996879	-0.234319	0.534257	-0.165827	0.74637	23.2173	35.3533	27.7617	34.6485	24.8864	24.9554	31.2187	35.6167	29.8661	35.0233	35.3316	31.5628	ENSMUSG00000026072	inside	2023	Il1r1
chr1	40270391	40270643	253	-0.244696	0.974621	-0.515599	0.973622	-0.524282	0.381625	-0.795185	0.23048	19.8174	52.2165	19.8855	19.9915	25.4656	11.1431	47.1325	41.2778	66.3525	39.2337	36.5271	37.465	ENSMUSG00000026072	inside	6151	Il1r1
chr1	40275131	40275896	766	-0.241638	0.90908	-0.305404	0.94071	-0.0832373	0.812212	-0.147003	0.703605	46.507	44.8408	37.0619	37.332	36.047	37.2643	33.9367	45.0393	49.4501	40.8688	29.9531	45.6566	ENSMUSG00000103560	upstream	1284	NA
chr1	40282176	40282815	640	0.255629	0.965491	0.295569	0.980014	-0.99764	0.00711626	-0.957699	0.040352	12.3696	17.7277	7.01875	19.7572	12.3679	9.36063	17.1415	25.0592	23.3155	25.0539	27.8834	37.2813	ENSMUSG00000103560	inside	844	NA
chr1	40325179	40325630	452	0.284629	0.967519	-0.101871	0.996879	0.165141	0.812334	-0.221359	0.790905	16.9306	8.25244	11.5281	22.8102	12.2177	8.57611	13.7185	15.6781	12.3799	15.4146	12.6903	10.1237	ENSMUSG00000070942	upstream	38140	Il1rl2
chr1	40355380	40355863	484	0.151222	0.961436	-0.21626	0.974375	0.140399	0.628517	-0.227083	0.492256	67.0615	90.8763	86.4988	77.5719	90.1384	84.4596	111.854	87.464	104.053	85.9781	82.52	78.3359	ENSMUSG00000070942	upstream	7907	Il1rl2
chr1	40358758	40359194	437	-0.0921654	0.985118	-0.194768	0.984849	0.694484	0.0107721	0.591882	0.0877736	83.3319	88.2023	107.315	81.9085	58.5518	96.7689	114.061	54.6233	68.621	62.4642	45.4545	53.8517	ENSMUSG00000070942	upstream	4576	Il1rl2
chr1	40372989	40373203	215	0.12252	0.989383	-0.497676	0.974375	1.2233	0.00777068	0.603106	0.357681	41.7305	33.9757	30.9217	26.2393	32.5351	45.894	51.0259	17.3476	28.696	23.084	12.3515	12.1619	ENSMUSG00000070942	inside	9219	Il1rl2
chr1	40375099	40375664	566	0.184486	0.976751	0.439696	0.973622	-0.536819	0.235792	-0.28161	0.676757	14.9192	26.0866	12.6982	29.2143	24.067	19.3011	8.84859	23.7228	20.2799	29.3413	27.5879	32.916	ENSMUSG00000070942	inside	11329	Il1rl2
chr1	40404307	40404520	214	-0.7178	0.875834	-0.522345	0.976312	-0.423437	0.583274	-0.227981	0.819153	19.7297	13.0728	18.4718	8.18128	12.0426	8.23365	12.2589	20.9145	18.7731	9.81196	12.9056	21.3827	ENSMUSG00000103230	downstream	10611	NA
chr1	40439434	40440082	649	-0.412321	0.901946	-0.66832	0.826061	0.215034	0.687465	-0.0409655	0.958525	19.1103	14.8476	15.2271	10.1912	13.3309	7.05886	17.6388	18.1028	15.4755	12.3533	9.00192	10.0724	ENSMUSG00000026069	upstream	28648	Il1rl1
chr1	40444792	40445470	679	-0.616428	0.57846	-0.410878	0.930213	0.52766	0.0858788	0.73321	0.031946	54.0205	52.1885	56.8943	42.4018	24.9416	32.6969	41.7973	30.2115	35.0776	27.8319	17.3648	29.8449	ENSMUSG00000026069	upstream	23260	Il1rl1
chr1	40600420	40601277	858	-0.213769	0.949748	-0.0798333	0.99616	-0.174115	0.639075	-0.0401794	0.943337	27.3726	23.7298	37.9045	19.9521	28.9637	20.1254	32.7994	30.4291	30.6024	28.5886	29.7126	28.1899	ENSMUSG00000026065	upstream	17964	Slc9a4
chr1	40658105	40658237	133	0.928069	0.804889	-0.521327	0.978743	0.428333	0.56736	-1.02106	0.199006	13.8886	12.8544	17.5627	19.0145	30.4493	21.197	41.2427	37.8583	22.6548	17.9405	26.356	17.2026	ENSMUSG00000102676	upstream	32104	NA
chr1	40680764	40682002	1239	-0.0890222	0.990025	0.213872	0.989573	-0.00330892	0.995944	0.299585	0.599193	19.5943	13.0458	20.7379	13.3457	13.6686	20.7629	19.4411	16.2555	12.6226	16.1769	9.68778	25.5887	ENSMUSG00000026062	upstream	37732	Slc9a2
chr1	40714824	40715507	684	0.0339957	0.994174	-0.55637	0.693337	0.994237	2.35284e-05	0.403871	0.228078	47.8387	37.9463	49.9111	41.8074	43.867	51.0053	48.8139	37.0793	31.2552	23.4423	18.7908	29.1489	ENSMUSG00000026062	upstream	4227	Slc9a2
chr1	40789867	40790962	1096	0.133852	0.970046	-0.0630867	0.996739	0.213946	0.464701	0.0170073	0.973079	32.7448	22.5474	29.8374	29.2864	30.4001	36.6548	28.0705	31.1379	24.7425	28.5634	27.6218	22.963	ENSMUSG00000103270	upstream	19583	NA
chr1	40824641	40824755	115	-1.0437	NA	-0.604246	0.979376	-0.274828	0.819991	0.164627	0.910355	32.125	18.9208	14.0619	10.1495	11.2049	9.19305	10.3692	25.946	12.4765	7.4695	12.9314	19.8952	ENSMUSG00000041945	inside	5092	Mfsd9
chr1	40840396	40841157	762	0.147559	0.985118	0.0440473	0.996879	1.04816	0.0221432	0.94465	0.109334	12.467	13.6656	12.0258	18.1257	12.3203	17.1113	9.07642	5.62888	7.53177	5.38593	4.04259	12.8681	ENSMUSG00000079588	upstream	3604	Tmem182
chr1	40847644	40847962	319	-0.179756	0.974768	-0.791446	0.780745	1.43048	0.000169745	0.818788	0.0960712	50.4606	36.541	58.5791	32.9303	35.2003	72.9104	33.6429	24.5532	30.1353	13.763	14.9844	20.4922	ENSMUSG00000079588	inside	2883	Tmem182
chr1	40867703	40868058	356	-0.772485	0.770853	-0.719512	0.807263	-2.02248	1.00469e-06	-1.96951	1.13844e-05	16.3075	22.7019	7.06607	10.3824	8.79034	7.91911	8.70893	67.0516	54.0066	44.2365	37.2973	26.6254	ENSMUSG00000079588	inside	22942	Tmem182
chr1	41380143	41380335	193	0.0480483	0.995667	-0.650081	0.974375	0.541924	0.511154	-0.156205	0.900503	21.8764	9.66348	18.6197	9.07147	14.3067	18.2591	27.1855	25.1226	11.8947	14.8358	7.15489	13.5482	ENSMUSG00000104072	upstream	159731	4930448I06Rik
chr1	41390178	41390429	252	-0.246622	0.975691	0.689171	0.956385	0.0206117	0.982244	0.956405	0.194918	19.896	15.4187	34.2248	12.3513	13.1486	29.3667	25.5526	12.5805	11.3873	14.3923	16.4392	29.8315	ENSMUSG00000104072	upstream	169766	4930448I06Rik
chr1	41555653	41556402	750	0.143357	0.975691	-0.377259	0.956385	0.29803	0.432688	-0.222585	0.66226	34.8327	28.3902	39.7692	21.5283	40.0067	39.9387	50.56	43.7623	36.3483	31.4328	36.5406	23.0974	ENSMUSG00000100185	downstream	9689	NA
chr1	41652192	41653086	895	-0.216968	0.967143	-0.168426	0.990887	-0.360071	0.391053	-0.31153	0.562986	19.7545	16.3235	12.4471	17.6057	18.3052	8.66235	9.59292	17.5027	22.2835	16.3161	20.5324	16.0686	ENSMUSG00000100185	upstream	83489	NA
chr1	41915677	41915906	230	0.146327	0.98981	1.3048	0.891629	2.13089	0.000267641	3.28937	0.000260676	24.0938	16.2178	21.8741	26.2196	20.8091	29.1113	15.5537	1.62163	2.49531	5.39464	6.92756	1.42109	ENSMUSG00000100832	inside	62814	NA
chr1	42309310	42309506	197	-0.29234	NA	-0.90911	0.94071	-0.502831	0.607319	-1.1196	0.239669	12.0556	11.0451	8.20873	7.8998	11.213	14.3107	1.21061	29.3457	16.0232	15.988	12.9408	4.97741	ENSMUSG00000101299	inside	8295	NA
chr1	42763517	42763766	250	-0.00518328	0.99962	0.802768	0.893402	-1.79235	0.000957377	-0.984401	0.200844	8.44429	11.1903	4.31232	8.55943	8.83584	11.2768	3.81585	19.3947	12.6263	25.9607	27.6179	30.0702	ENSMUSG00000097063	upstream	10903	Pantr2
chr1	42850989	42851696	708	-0.0434328	0.991529	-0.136312	0.989573	-0.0217726	0.95201	-0.114652	0.76686	87.9614	95.2722	105.575	65.3937	101.66	91.5842	115.877	112.472	96.4641	95.7132	100.971	87.2523	ENSMUSG00000060679	upstream	38697	Mrps9
chr1	42952811	42953664	854	-0.126343	0.984293	-0.149177	0.993929	-0.077768	0.889777	-0.100602	0.884322	20.3939	12.7394	17.463	10.7061	10.9931	24.3462	16.7558	20.5267	15.4569	18.217	14.1796	16.0746	ENSMUSG00000041907	upstream	38368	Gpr45
chr1	43092007	43093098	1092	0.153727	0.952311	0.259585	0.94952	-0.141001	0.593279	-0.0351437	0.933479	35.5229	30.3156	37.022	42.3981	34.7257	37.4345	37.5645	39.4492	30.8771	41.8658	40.6603	43.6997	ENSMUSG00000100269	upstream	2329	NA
chr1	43098100	43099114	1015	-0.0525253	0.98981	-0.191285	0.974375	-0.138307	0.579063	-0.277067	0.300073	58.4965	69.059	85.857	61.5221	70.1862	68.0497	75.6591	86.17	86.7949	77.6714	80.792	67.6241	ENSMUSG00000100269	downstream	1806	NA
chr1	43139666	43139933	268	-0.0389322	0.995667	0.266617	0.983547	-0.441381	0.294363	-0.135832	0.842691	35.4471	42.9147	34.8633	41.3745	20.606	31.5582	54.2833	40.3592	42.8299	44.8727	48.7514	58.5403	ENSMUSG00000010290	inside	1796	AI597479
chr1	43141597	43141978	382	-0.824899	0.691612	-0.462003	0.967168	-0.555342	0.264177	-0.192446	0.790191	31.0858	23.1911	15.5221	13.7497	13.4928	7.38011	16.2323	19.5275	32.6774	20.238	18.0745	18.8238	ENSMUSG00000010290	inside	3727	AI597479
chr1	43147376	43147836	461	0.25191	0.967073	-0.175885	0.993049	0.00547678	0.993682	-0.422318	0.482179	14.3104	12.8113	21.0471	16.8792	14.7743	21.4039	24.3147	15.372	27.3888	17.8051	16.1292	24.8151	ENSMUSG00000010290	inside	7271	AI597479
chr1	43163396	43164291	896	-0.271281	0.894675	-0.16837	0.984762	-0.255041	0.380609	-0.15213	0.706287	44.177	41.8041	42.5136	22.7968	41.7056	36.9706	40.7244	48.7031	46.4389	42.6088	39.0036	45.9633	ENSMUSG00000010290	downstream	8289	AI597479
chr1	43244962	43245636	675	-0.22469	0.920262	-0.170185	0.983547	0.168586	0.579533	0.223091	0.530512	51.2131	40.5246	47.3823	35.4482	43.0884	44.3763	35.6853	37.2974	41.6624	33.6527	39.3417	31.4744	ENSMUSG00000008136	upstream	8818	Fhl2
chr1	43250249	43250802	554	0.203661	0.969197	0.0327947	0.996879	-0.599582	0.0974863	-0.770448	0.0708634	14.2898	18.2353	15.5679	18.9617	27.5788	13.3581	12.9147	26.2563	28.7478	27.0481	27.8019	30.0891	ENSMUSG00000008136	upstream	14105	Fhl2
chr1	43264525	43264724	200	0.265836	0.978789	0.41194	0.984849	-0.455903	0.547727	-0.309799	0.771685	15.8331	16.3192	14.3744	11.672	7.3632	35.24	23.8491	25.1758	13.6306	20.0432	21.7756	37.5877	ENSMUSG00000008136	upstream	28381	Fhl2
chr1	43269768	43269989	222	0.279681	0.966925	-0.299313	0.984849	0.0184107	0.980704	-0.560583	0.373176	34.4714	18.2025	18.6155	23.6594	36.4843	33.3352	19.3371	28.5611	39.4247	27.0854	27.2734	29.4459	ENSMUSG00000008136	upstream	33624	Fhl2
chr1	43337286	43337744	459	0.478658	0.884104	0.278108	0.983547	-0.241517	0.632419	-0.442067	0.452415	10.3484	15.2373	8.61211	15.2575	18.4481	14.5874	15.5876	15.0327	16.2548	18.9224	16.8938	22.0748	ENSMUSG00000099576	inside	4341	NA
chr1	43338712	43338821	110	-0.205835	NA	-0.6842	0.978918	1.26843	0.150774	0.790065	0.495836	23.9895	22.6067	21.2349	5.30543	18.408	28.8327	28.1853	10.172	15.6524	7.80902	9.6566	5.94273	ENSMUSG00000099576	inside	3264	NA
chr1	43445241	43446435	1195	-0.0223083	0.995667	-0.106717	0.990887	-0.277571	0.264594	-0.361979	0.214437	30.9153	29.2634	32.0266	30.9299	26.1871	37.7466	27.142	43.0715	36.0201	40.5735	37.1557	31.1807	ENSMUSG00000101923	upstream	2309	NA
chr1	43462759	43462991	233	0.0363864	0.995667	-0.0347177	0.996879	0.074664	0.900448	0.00355986	0.996229	40.7718	38.0214	39.3291	25.882	39.5022	55.9606	42.9897	41.6195	36.9477	31.5415	33.28	54.7088	ENSMUSG00000101923	downstream	13636	NA
chr1	43471361	43471710	350	-0.505664	0.83203	-0.35123	0.974375	-0.809148	0.0261117	-0.654714	0.153473	49.761	56.8397	37.9895	21.1207	35.7641	26.1783	52.4679	69.2667	82.3986	50.9942	47.3449	84.0471	ENSMUSG00000066877	upstream	12029	Nck2
chr1	43474516	43474988	473	-0.409963	0.782981	-0.249709	0.974375	-0.718925	0.00319547	-0.558671	0.0671483	65.8316	47.9735	57.7407	34.1357	40.0851	43.2119	54.4545	87.1325	80.3853	61.544	79.274	70.4835	ENSMUSG00000066877	upstream	8751	Nck2
chr1	43502687	43503157	471	0.542205	0.934032	-0.381543	0.98547	-0.527638	0.460052	-1.45139	0.0419913	5.04237	3.95977	6.86675	10.7385	5.86242	7.48196	6.58254	19.0051	10.0528	8.10561	6.54025	20.8185	ENSMUSG00000066877	inside	18948	Nck2
chr1	43694731	43695177	447	0.329692	0.910485	0.00191135	0.999855	-0.0864365	0.858632	-0.414217	0.369455	21.8428	25.3819	22.1083	27.8525	34.1804	23.651	29.878	27.9522	33.7034	33.9497	35.6452	20.4738	ENSMUSG00000026051	upstream	74585	Ecrg4
chr1	43730193	43730803	611	0.00300281	0.99962	0.183487	0.989573	-0.928771	0.00282324	-0.748288	0.0599258	12.9567	14.4992	12.9393	14.3273	16.2689	8.6514	13.6615	24.1121	21.3694	23.7437	25.9037	28.352	ENSMUSG00000026051	upstream	38959	Ecrg4
chr1	43819168	43819592	425	-0.371688	0.931075	-0.109252	0.996879	0.519058	0.300011	0.781494	0.160346	23.5944	15.3592	21.1388	13.7317	12.1276	19.0711	17.3958	12.725	10.4656	8.98293	9.49755	15.3812	ENSMUSG00000090243	upstream	5478	NA
chr1	43827067	43828184	1118	0.219245	0.920262	-0.0211369	0.996888	0.494068	0.0334766	0.253686	0.461831	73.8781	63.2527	106.072	79.6922	99.2847	88.8881	109.646	72.7267	63.3982	64.8812	77.9092	57.3011	ENSMUSG00000090243	downstream	719	NA
chr1	43862561	43863114	554	0.0870253	0.991241	-0.301286	0.979376	-0.433804	0.343581	-0.822116	0.089429	15.2424	8.13575	13.622	11.5877	16.6137	7.63322	14.6366	22.2169	20.7192	18.6063	15.5307	18.2894	ENSMUSG00000057363	inside	3846	Uxs1
chr1	43868496	43868751	256	-0.308529	0.973902	0.736425	0.976707	1.99279	0.00236999	3.03775	0.000233316	31.9547	15.1778	54.0444	31.1556	33.796	16.5188	26.0849	8.74159	0	4.47392	6.22398	11.4908	ENSMUSG00000057363	upstream	1536	Uxs1
chr1	43933523	43934469	947	-0.0134699	0.997305	-0.0132178	0.998432	-0.14193	0.611878	-0.141678	0.690636	105.331	113.735	124.467	79.4975	126.737	115.358	132.97	126.819	126.057	128.199	141.78	104.233	ENSMUSG00000101395	upstream	2985	NA
chr1	44024923	44025053	131	-0.236822	NA	-0.441493	0.98852	-1.26113	0.132539	-1.4658	0.124393	4.02877	24.9148	4.11481	13.3648	8.43115	8.07023	9.1027	25.6242	38.3344	21.1287	19.4606	32.4355	ENSMUSG00000090106	downstream	32577	NA
chr1	44064482	44064999	518	-0.208726	0.975733	-0.0674438	0.996879	-0.778941	0.0952191	-0.637658	0.286475	12.2263	15.6021	9.36556	16.524	11.7271	9.52433	4.60407	21.9608	16.8963	20.2679	16.8152	18.2985	ENSMUSG00000047343	upstream	5288	Mettl21c
chr1	44101535	44102809	1275	0.148242	0.959306	-0.209694	0.974375	-0.0373688	0.911492	-0.395305	0.152912	43.0493	45.1026	54.6791	40.4323	50.8205	60.2535	60.7917	62.7475	62.6812	53.8227	61.2342	46.6562	ENSMUSG00000091844	inside	6503	NA
chr1	44118325	44120108	1784	-0.0307481	0.993015	0.0155073	0.997329	-0.233043	0.275706	-0.186787	0.514098	56.0606	50.4421	41.9992	47.7608	46.7423	54.3218	45.0512	60.8383	51.714	59.7593	61.6853	48.0015	ENSMUSG00000091844	overlapStart	581	NA
chr1	44147565	44148440	876	-0.202991	0.931075	-0.0593963	0.996739	-0.210403	0.447476	-0.0668084	0.878507	77.4181	71.1459	73.2258	50.4097	64.302	56.3197	85.4864	77.9159	76.8176	76.9215	84.6386	59.3255	ENSMUSG00000101104	inside	1510	NA
chr1	44167590	44167797	208	-0.0534145	0.995667	0.114027	0.996879	1.45574	0.0621933	1.62318	0.0939517	25.3735	17.9332	18.1408	20.5756	30.09	10.1654	16.0523	6.27601	6.89809	3.21204	2.55343	20.4281	ENSMUSG00000041684	inside	9473	Bivm
chr1	44551446	44552721	1276	-0.299492	0.835387	-0.191222	0.978771	-0.524794	0.0147939	-0.416523	0.131281	44.4632	38.368	32.3875	29.7287	30.1511	25.9605	38.1286	57.583	44.7532	43.0843	46.5348	44.5704	ENSMUSG00000056870	upstream	37950	Gulp1
chr1	44567120	44567727	608	0.289076	0.940885	-0.0315221	0.996879	0.178114	0.708783	-0.142484	0.823323	10.8505	15.082	18.3226	19.8372	16.3492	17.9678	18.8282	20.2437	12.9793	16.4829	17.6455	13.4396	ENSMUSG00000056870	upstream	22944	Gulp1
chr1	44576190	44576750	561	-0.408082	0.926791	0.392678	0.978197	-0.622723	0.19167	0.178038	0.818942	8.46687	12.744	13.452	9.01577	6.8907	12.5633	7.65211	11.3023	9.46304	12.7598	16.6624	10.4872	ENSMUSG00000056870	upstream	13921	Gulp1
chr1	44591888	44592106	219	-0.311615	0.966628	-0.0344852	0.998184	0.15164	0.843637	0.428769	0.587969	27.7139	31.2261	22.1523	20.4304	19.3326	24.137	23.958	21.2885	18.9997	12.6387	14.551	37.3116	ENSMUSG00000056870	inside	1217	Gulp1
chr1	45021246	45022428	1183	0.358237	0.805266	0.0293404	0.996879	-0.551475	0.0164545	-0.880372	0.000820873	27.2138	25.6188	17.7706	25.9815	30.6541	27.1077	36.2877	45.2425	41.1156	40.501	49.5646	41.7196	ENSMUSG00000101251	upstream	57193	Gm3496
chr1	45031675	45031865	191	-0.840662	NA	-1.20093	0.814601	-0.587588	0.538772	-0.94786	0.304372	13.8159	4.88233	16.9332	6.11097	6.74639	5.53508	7.49185	18.5511	26.2922	11.9929	8.34209	8.55628	ENSMUSG00000101251	upstream	67622	Gm3496
chr1	45101078	45102113	1036	-0.315501	0.946133	-0.0105048	0.999855	-0.192727	0.736721	0.112269	0.885761	15.2829	11.7016	6.76402	9.76418	9.59491	6.12278	9.89874	13.8605	6.92472	8.10718	11.9962	10.7267	ENSMUSG00000101937	upstream	115114	Gm5268
chr1	45116840	45117030	191	-0.778488	0.886899	-0.350773	0.989596	-1.1402	0.103314	-0.712483	0.443202	42.8294	15.4607	14.111	4.07398	19.2754	5.53508	24.9728	30.2676	46.5747	26.9841	21.6894	44.4927	ENSMUSG00000101937	upstream	100197	Gm5268
chr1	45179883	45180082	200	0.831292	0.822094	0.375105	0.986975	0.138102	0.868478	-0.318086	0.751632	10.5554	16.3192	9.8824	14.5899	26.6916	26.43	21.4642	21.446	10.0436	19.5659	24.4312	14.7082	ENSMUSG00000101937	upstream	37145	Gm5268
chr1	45275667	45276657	991	-0.0625065	0.990105	0.147887	0.989573	-0.35812	0.215302	-0.147726	0.740287	22.9001	35.601	26.1089	22.967	35.1071	22.0472	27.9162	31.238	31.7075	33.6123	38.2659	32.3222	ENSMUSG00000101937	downstream	57501	Gm5268
chr1	45290161	45290632	472	0.292119	0.966557	0.191741	0.994356	0.465816	0.404722	0.365438	0.633591	27.9538	15.4762	12.1817	32.9716	27.69	11.9458	15.1583	11.4579	16.7191	20.4233	15.3033	11.7721	ENSMUSG00000026043	upstream	60066	Col3a1
chr1	45296165	45296458	294	0.128888	0.989375	-0.481812	0.973622	0.127283	0.856753	-0.483417	0.479529	22.4391	14.2734	29.3355	25.1437	21.9143	14.3837	33.2589	38.6929	22.9373	18.1797	29.6267	16.676	ENSMUSG00000026043	upstream	54240	Col3a1
chr1	45299487	45300513	1027	0.196689	0.953691	-0.0730665	0.996739	0.287621	0.366623	0.0178656	0.975455	20.2988	27.997	23.794	35.4212	27.7823	23.6764	23.2221	23.4244	24.3092	17.8434	25.9609	24.824	ENSMUSG00000026043	upstream	50185	Col3a1
chr1	45304215	45304591	377	0.0798784	0.991241	0.0886914	0.996879	-0.510124	0.217332	-0.501311	0.339995	27.2984	29.2703	16.2046	19.6081	37.5973	16.8255	26.5692	30.669	37.6778	37.2154	36.3467	35.546	ENSMUSG00000026043	upstream	46107	Col3a1
chr1	45311391	45311833	443	-0.27557	0.943006	0.140356	0.994109	-0.213945	0.643079	0.20198	0.732278	42.293	41.3988	32.4479	45.2299	31.1648	16.7052	32.3012	34.5191	32.7122	38.7807	44.8389	25.0855	ENSMUSG00000026043	upstream	38865	Col3a1
chr1	45313018	45313169	152	0.87813	0.76574	0.361309	0.98547	0.275862	0.694521	-0.240959	0.805229	17.3608	16.3601	30.7347	56.3121	49.6532	27.8211	21.9662	30.6722	20.7669	25.7447	35.6405	38.7059	ENSMUSG00000026043	upstream	37529	Col3a1
chr1	45355861	45356309	449	-0.23012	0.95687	0.334631	0.976312	0.681901	0.0481781	1.24665	0.00130435	66.4118	33.9226	42.8191	39.4264	33.6182	39.2428	48.8667	24.0897	15.9778	22.9575	29.572	21.8385	ENSMUSG00000026043	inside	5163	Col3a1
chr1	45380033	45380493	461	0.266539	0.968666	0.993268	0.753542	0.437719	0.424935	1.16445	0.0563009	21.1794	10.7884	8.96451	18.5671	12.7778	16.8174	16.0373	5.25886	6.53597	13.4573	12.4426	8.50802	ENSMUSG00000026043	inside	8373	Col3a1
chr1	45419935	45420062	128	0.179303	0.985889	-0.705972	0.956385	1.05867	0.0879137	0.173395	0.873927	35.0471	33.9983	28.075	31.9155	28.7625	27.5313	57.7595	16.0262	40.3538	23.8609	12.448	15.3211	ENSMUSG00000026043	downstream	31069	Col3a1
chr1	45430447	45430973	527	-0.0637898	0.993449	-0.23197	0.989573	-0.534355	0.238875	-0.702535	0.177916	16.0233	11.7967	12.9561	18.4566	14.6705	5.34953	11.3136	19.4626	24.231	17.7485	17.7374	21.0871	ENSMUSG00000026043	downstream	41581	Col3a1
chr1	45502415	45503381	967	-0.2631	0.924729	-0.061147	0.996879	-0.427751	0.156908	-0.225799	0.603956	33.5654	28.7698	18.9528	20.1171	29.6965	19.3146	19.977	33.5561	29.5269	28.031	31.0869	31.7724	ENSMUSG00000104476	downstream	21615	NA
chr1	45626753	45627074	322	-0.0344775	0.995667	-0.290949	0.978918	0.691902	0.0510746	0.43543	0.372816	54.9076	34.7525	52.4532	37.4566	38.8741	45.9652	62.2149	29.5368	39.6576	24.8983	27.0505	35.5272	ENSMUSG00000100894	upstream	14112	NA
chr1	45627966	45628227	262	0.509354	0.86028	-0.200863	0.990735	0.183575	0.734677	-0.526642	0.342328	21.151	26.1012	26.7463	31.9271	49.1817	20.1756	37.3211	41.2834	30.6675	28.0502	31.6235	34.9305	ENSMUSG00000100894	upstream	12959	NA
chr1	45663662	45664355	694	-0.300702	0.968946	-0.149418	0.99616	-0.952842	0.0685963	-0.801558	0.226421	11.7873	10.9735	4.66029	8.40919	12.7318	3.55447	3.78011	19.3474	12.4046	13.7527	13.3161	16.0128	ENSMUSG00000100894	downstream	21749	NA
chr1	45672699	45673337	639	-0.187759	0.940885	-0.233673	0.973622	-0.480014	0.0358127	-0.525928	0.0520605	48.7298	49.1315	42.4596	38.0541	46.3801	35.8467	42.9208	73.5443	61.2991	62.7329	58.8463	48.0812	ENSMUSG00000100894	downstream	30786	NA
chr1	45675810	45676079	270	0.313821	0.952037	0.0454159	0.996879	-0.292771	0.572487	-0.561175	0.329045	21.5017	20.7228	25.2883	28.0992	26.5893	16.9674	38.8651	29.0091	37.1986	24.7446	42.489	36.3167	ENSMUSG00000100894	downstream	33897	NA
chr1	45723385	45723944	560	0.25921	0.974705	-0.151047	0.995624	-1.04533	0.0435385	-1.45559	0.0148655	10.3669	5.55075	3.20857	3.82118	10.1901	6.92215	8.51752	19.3147	14.6042	12.7826	20.1064	12.2569	ENSMUSG00000119267	downstream	672	NA
chr1	45758126	45758363	238	-0.0708851	0.994031	-0.405756	0.978743	-0.679013	0.193017	-1.01388	0.0749895	23.2839	17.6318	13.5892	16.3473	23.2034	13.3261	14.0289	29.7753	42.2001	25.6655	34.8125	19.2265	ENSMUSG00000065255	upstream	27692	Gm23974
chr1	45765632	45766400	769	0.0735195	0.985118	-0.0598561	0.99616	-0.374848	0.101752	-0.508223	0.0545483	36.7173	39.411	32.2443	35.4156	38.7789	38.0354	40.0069	56.0189	47.0182	51.7555	52.4897	42.0782	ENSMUSG00000065255	upstream	19655	Gm23974
chr1	45767561	45767871	311	0.0230669	0.99756	-0.228403	0.98867	-0.651475	0.110349	-0.902945	0.0511458	18.667	28.4855	28.3097	26.8968	35.5138	23.7955	16.1039	46.7717	48.4419	40.5098	51.2328	27.3251	ENSMUSG00000065255	upstream	18184	Gm23974
chr1	45794933	45795871	939	0.19688	0.901237	0.148925	0.978918	-0.262569	0.182882	-0.310524	0.196517	53.1141	53.2966	59.1279	65.8801	56.4591	73.1822	58.9242	68.5177	68.4549	76.6395	79.8649	70.3128	ENSMUSG00000065255	downstream	8748	Gm23974
chr1	45825264	45825431	168	-0.137298	0.98981	-0.810594	0.877069	0.272266	0.712641	-0.40103	0.62164	26.7026	20.3527	27.8076	18.5269	23.01	16.781	31.2309	42.1816	23.9134	13.6348	20.8652	23.3464	ENSMUSG00000025995	upstream	8895	Wdr75
chr1	45837665	45838500	836	-0.146369	0.970368	-0.198222	0.982515	-0.580243	0.0290967	-0.632095	0.0448187	27.7773	19.5206	24.9317	19.3136	25.322	20.2335	21.1104	41.2681	32.9524	31.8526	36.8476	26.9768	ENSMUSG00000025995	inside	3339	Wdr75
chr1	45905116	45905664	549	0.112507	0.98866	0.0423637	0.996879	-0.753327	0.0518311	-0.82347	0.0810976	15.3812	24.6296	13.0914	21.9691	27.1594	16.6893	10.4258	32.9495	30.3164	34.2484	37.1489	25.0049	ENSMUSG00000084817	upstream	8202	NA
chr1	45925231	45926144	914	0.0205392	0.995667	-0.0619607	0.996879	0.0285957	0.94697	-0.0539042	0.919432	38.1102	34.5191	30.6675	26.1789	36.0507	42.0258	36.0084	43.6633	27.9425	37.2794	36.7247	27.1779	ENSMUSG00000098549	downstream	2541	NA
chr1	45967216	45967406	191	-0.73927	NA	-0.127173	0.996879	1.2584	0.129711	1.8705	0.0418296	24.8687	26.8528	12.2295	16.2959	9.6377	11.0702	13.7351	3.90549	7.51205	7.99528	5.56139	0	ENSMUSG00000025993	upstream	1533	Slc40a1
chr1	46066516	46067279	764	0.0121829	0.998874	-0.219697	0.983677	-0.0242356	0.962862	-0.256116	0.606409	33.1582	37.4312	23.5183	23.9346	23.8533	41.5131	38.7079	46.8659	28.358	34.7295	32.5341	28.6635	ENSMUSG00000044457	inside	2350	Stk-ps2
chr1	46852309	46854402	2094	0.0549412	0.98866	-0.123485	0.986975	-0.175537	0.44704	-0.353963	0.152961	80.5263	69.9914	91.2129	65.4945	91.6884	86.5013	91.2278	112.124	93.872	104.742	92.2219	86.0049	ENSMUSG00000100213	downstream	34287	NA
chr1	46970417	46970729	313	0.214813	0.978216	-0.288472	0.989573	0.49538	0.408574	-0.00790473	0.994415	21.9201	7.94484	21.8142	17.4023	15.8791	25.8952	20.5727	16.0868	17.8777	14.6367	9.84171	18.7965	ENSMUSG00000100160	upstream	34378	NA
chr1	50399691	50399924	234	-0.0103026	0.999513	-0.0990434	0.996879	1.89188	0.0022215	1.80314	0.0203394	21.4265	12.6197	20.7323	14.964	15.7333	28.6137	14.2687	4.78172	5.51847	4.48667	4.08548	6.98397	ENSMUSG00000100451	downstream	36787	NA
chr1	50507991	50508221	231	-0.426127	0.948846	0.200502	0.995219	0.527023	0.455945	1.15365	0.118955	20.5624	26.2399	43.5588	19.369	23.1096	24.4087	23.7458	16.9534	10.5591	8.26352	10.1164	33.9584	ENSMUSG00000099941	upstream	63968	Gm20118
chr1	50694861	50695119	259	-0.395917	0.964131	-0.450236	0.983547	0.219779	0.808765	0.165461	0.884573	24.4526	15.002	12.4874	6.00873	17.0576	6.80309	21.1787	13.6805	16.6193	12.5293	7.79239	13.8817	ENSMUSG00000099941	downstream	122511	Gm20118
chr1	50745184	50745935	752	-0.00402812	0.999528	-0.00134081	0.99991	0.315153	0.452978	0.317841	0.549942	16.8437	10.9539	17.6813	13.4517	14.4425	17.3388	15.2228	13.1434	11.0663	12.9458	13.1366	9.12746	ENSMUSG00000100816	upstream	108599	NA
chr1	50926736	50928067	1332	0.0557133	0.98866	0.121713	0.989573	0.442103	0.0251139	0.508103	0.0334968	62.0088	45.5061	54.9022	49.5094	53.4827	64.2892	57.8322	41.3016	34.6852	38.2634	42.505	43.4328	ENSMUSG00000026109	upstream	11739	Tmeff2
chr1	50940319	50941366	1048	0.004364	0.999513	-0.408036	0.819437	-0.1312	0.678957	-0.5436	0.0537367	23.9208	21.9488	22.9744	17.6342	24.0639	26.5645	24.3497	33.6318	33.1319	23.952	26.7584	24.6385	ENSMUSG00000026109	inside	513	Tmeff2
chr1	50948587	50949311	725	-0.0241772	0.995667	0.660911	0.691888	0.126735	0.760849	0.811823	0.0234823	37.4898	30.6554	33.9533	26.5638	33.7692	43.7462	30.5926	24.9507	14.0512	28.1723	27.1051	37.8695	ENSMUSG00000100671	downstream	3510	NA
chr1	50962244	50962924	681	0.313053	0.934887	-0.271828	0.982515	0.233509	0.614772	-0.351371	0.515057	12.3998	13.4653	10.8177	13.4259	14.5967	21.2165	12.6074	18.3475	13.0628	13.4546	14.0382	10.559	ENSMUSG00000100671	downstream	17167	NA
chr1	50965416	50965578	163	-1.28636	NA	-0.365115	0.990735	-0.386668	0.702396	0.534576	0.625665	35.6163	25.7446	17.6373	2.3869	5.64663	12.9718	23.4101	13.7291	22.0062	12.2964	15.6401	14.0365	ENSMUSG00000100671	downstream	20339	NA
chr1	50970972	50971361	390	-0.287773	0.969197	-0.426213	0.978197	-1.37412	0.00338002	-1.51256	0.00553173	8.79614	24.7079	11.0572	10.4748	19.352	9.93949	9.17272	43.9919	42.6762	45.5193	31.3221	17.5996	ENSMUSG00000100671	downstream	25895	NA
chr1	51241714	51242228	515	0.180028	0.973902	0.323345	0.983547	1.6276	6.08803e-06	1.77092	8.90647e-05	27.6694	36.8182	20.9336	27.1968	33.2416	43.7934	26.3961	10.8633	6.12925	9.63703	8.2503	15.2318	ENSMUSG00000099625	downstream	4807	NA
chr1	51243962	51244197	236	0.122836	0.990025	0.650359	0.952959	0.0229956	0.978832	0.550519	0.484141	40.2535	26.3425	9.89763	18.9587	36.66	31.3576	22.2322	19.755	14.5912	23.0521	25.6555	33.239	ENSMUSG00000099625	downstream	7055	NA
chr1	51288720	51289937	1218	-0.0375441	0.992375	0.173371	0.978918	-0.135166	0.621886	0.0757489	0.846709	44.414	36.8774	34.5198	38.1718	35.9697	40.7951	35.2449	38.8898	34.162	45.4493	43.867	32.4703	ENSMUSG00000045954	upstream	38348	Cavin2
chr1	51290660	51291061	402	0.145361	0.977472	0.0531787	0.996879	-0.307634	0.429416	-0.399817	0.3913	29.5393	27.8366	24.1361	19.3565	38.9224	34.1881	27.8832	38.0397	33.5501	37.5127	35.1433	39.0269	ENSMUSG00000045954	upstream	37224	Cavin2
chr1	51300660	51300826	167	-0.470695	0.947481	0.446417	0.983677	-0.0683668	0.945826	0.848745	0.333211	41.0838	14.8906	23.6704	12.8135	31.966	12.6611	15.709	12.2836	16.3241	16.574	17.1737	27.4006	ENSMUSG00000045954	upstream	27459	Cavin2
chr1	51333101	51334400	1300	-0.0549335	0.990025	-0.0843372	0.995158	-0.0659104	0.847047	-0.0953142	0.814531	27.4034	20.6829	19.6266	20.2015	21.24	23.8548	21.2807	24.0999	23.7294	23.7141	23.2056	20.1138	ENSMUSG00000045954	inside	4816	Cavin2
chr1	51477812	51478863	1052	0.142962	0.967337	-0.179742	0.983547	-0.074015	0.835736	-0.396719	0.218349	98.0786	110.952	132.71	79.8841	135.785	131.648	156.878	163.442	136.934	138.992	144.188	113.403	ENSMUSG00000101702	downstream	18228	NA
chr1	51597020	51597407	388	-0.246602	0.936444	-0.0144435	0.998688	-0.211154	0.566624	0.0210046	0.971816	43.5273	46.8666	39.826	34.0933	31.3126	42.6877	39.9533	51.4282	34.7607	39.6042	42.9818	45.4894	ENSMUSG00000103424	upstream	28492	NA
chr1	51669002	51669291	290	0.203065	0.984161	0.948341	0.858	-0.506219	0.452934	0.239057	0.823018	9.09946	9.64682	11.1526	12.7452	15.2342	10.9366	6.57905	9.64589	7.42139	10.5317	19.4131	20.2872	ENSMUSG00000099413	upstream	33125	Gm17767
chr1	51689951	51690146	196	-0.396615	0.935496	-1.0614	0.641232	0.71093	0.184481	0.0461418	0.960323	37.6977	34.8904	25.6686	26.7979	22.5404	26.9694	23.119	41.8645	21.9613	14.6087	15.7166	15.0084	ENSMUSG00000099413	upstream	54074	Gm17767
chr1	51697365	51697719	355	-0.458857	0.938057	-0.572125	0.973622	0.0594399	0.947109	-0.053828	0.960854	19.3267	11.3829	17.7149	15.8914	11.4078	13.8975	5.37444	22.5886	10.9126	7.7968	10.7719	16.5727	ENSMUSG00000099413	upstream	61488	Gm17767
chr1	51747511	51747805	295	-0.269533	0.964131	-0.337981	0.983547	1.63453	6.42374e-05	1.56608	0.00141655	68.8782	33.7184	78.5719	30.3339	49.92	57.3397	63.0585	22.7578	17.9958	20.0593	10.0821	18.8354	ENSMUSG00000101741	inside	12028	NA
chr1	51789269	51789588	320	1.49496	NA	-0.219626	0.995219	-0.242337	0.802318	-1.95693	0.0258581	2.47391	1.94276	3.369	4.86332	6.32775	8.81001	9.68868	11.6555	8.51914	10.4391	5.64308	10.2141	ENSMUSG00000101741	upstream	3167	NA
chr1	51808321	51808572	252	-0.907324	0.821303	-0.661904	0.962292	-0.81007	0.251013	-0.56465	0.522322	18.8489	24.0532	9.26921	3.08782	6.57429	13.9841	15.1423	25.901	25.6215	21.2097	11.8025	15.5643	ENSMUSG00000101741	upstream	22219	NA
chr1	51871316	51871646	331	0.0104779	0.999513	-0.0763639	0.996879	-0.0114639	0.989011	-0.0983058	0.921797	22.3225	15.9647	9.22828	9.40339	25.026	14.9051	12.9693	16.9022	16.472	15.8592	15.083	16.7869	ENSMUSG00000101724	downstream	15353	NA
chr1	51913190	51913328	139	-0.448091	0.933144	-0.167335	0.995219	-0.707517	0.205834	-0.426761	0.575622	30.3752	35.7804	56.8771	16.7942	26.4863	25.3525	53.1886	45.6156	65.0306	41.8853	42.7947	68.1917	ENSMUSG00000100313	downstream	2941	NA
chr1	51915032	51916129	1098	-0.156242	0.953689	-0.0843354	0.993929	-0.5752	0.00452098	-0.503293	0.0460252	31.9641	34.538	34.5287	24.0951	32.1889	31.7738	33.4495	52.9909	42.8611	45.5487	42.8567	47.3307	ENSMUSG00000100313	downstream	140	NA
chr1	51930433	51931109	677	-0.0920891	0.989143	-0.216085	0.985866	-1.0853	0.000353335	-1.2093	0.000824549	35.4704	41.7823	22.8249	25.2864	47.8554	20.3008	30.2957	84.2911	70.1506	77.1162	69.9783	50.6931	ENSMUSG00000100313	upstream	11666	NA
chr1	51996848	51997597	750	-0.439384	0.86825	-0.612425	0.819437	-0.703035	0.0538226	-0.876076	0.0346543	21.8144	33.1565	14.3744	18.9345	19.6352	7.98774	20.6692	41.0272	44.1919	29.6511	27.193	26.5838	ENSMUSG00000072324	upstream	16428	Gm8420
chr1	52004222	52004456	235	0.0562287	0.995574	-0.684005	0.872911	0.293094	0.614892	-0.44714	0.48701	17.9666	26.4546	25.2317	19.0394	21.9329	35.9898	23.3416	31.7425	32.3594	19.901	15.8204	26.4262	ENSMUSG00000062939	upstream	21851	Stat4
chr1	52100514	52100781	268	0.116726	0.991667	0.427238	0.978771	-1.55539	0.00292414	-1.24488	0.0663425	3.93857	12.1785	8.04537	8.71042	13.0505	6.57463	7.11912	16.0045	23.5565	24.9293	23.7812	32.9289	ENSMUSG00000101628	upstream	15639	NA
chr1	52113360	52114247	888	0.294964	0.866278	-0.110449	0.992057	0.489875	0.0416254	0.0844617	0.849464	33.877	38.5052	56.2512	51.262	55.1411	48.4153	56.1312	45.5718	35.8701	37.941	40.312	33.8628	ENSMUSG00000101628	upstream	2173	NA
chr1	52118964	52119839	876	0.125006	0.967519	0.0635954	0.99616	0.00185635	0.996066	-0.0595538	0.883139	40.0646	53.7586	57.8422	50.6318	55.8965	60.7448	55.2667	47.4733	58.3093	58.8351	56.0215	50.3707	ENSMUSG00000101628	inside	2544	NA
chr1	52133069	52133710	642	-0.391691	0.835387	-0.676211	0.527303	-0.881838	0.00102084	-1.16636	0.00013916	52.6124	58.5855	34.1448	33.3311	49.0307	22.5053	40.8629	114.449	103.029	66.4537	62.7077	75.8577	ENSMUSG00000078291	upstream	2844	Gm3940
chr1	52150030	52150294	265	-0.150444	0.984078	-0.203202	0.990887	0.0451527	0.947404	-0.00760602	0.993238	41.8232	28.7382	44.0725	13.9476	44.4571	31.9155	46.7982	40.8161	35.7347	32.775	34.4722	32.0683	ENSMUSG00000109599	inside	2616	NA
chr1	52232269	52233812	1544	0.0157705	0.995667	0.0294783	0.996879	-0.0685132	0.767665	-0.0548054	0.858712	81.0111	87.8773	90.3055	79.6273	94.1861	87.4153	88.5072	89.6201	90.0468	95.2582	101.132	77.0553	ENSMUSG00000026103	inside	29662	Gls
chr1	52302700	52303268	569	0.307299	0.94405	-0.163618	0.993367	0.127648	0.823374	-0.343269	0.570125	19.0145	9.83331	11.9997	12.9916	19.7344	19.8186	13.8316	16.3873	17.3992	18.1158	12.1344	14.9351	ENSMUSG00000099648	downstream	23588	Gm5975
chr1	52331535	52331705	171	-0.158718	0.990025	-1.85494	0.37103	1.60684	0.0209221	-0.0893848	0.944411	37.0364	19.0868	26.269	5.68809	31.2183	37.0948	25.1043	37.0793	20.9766	7.25595	11.1813	3.82281	ENSMUSG00000099648	upstream	3281	Gm5975
chr1	52366518	52366683	166	0.0804545	0.993333	-0.514955	0.978771	1.684	0.00197299	1.08859	0.12602	38.1519	38.3871	34.6371	15.2345	41.0299	44.5808	57.4676	21.3449	13.8294	9.77435	10.2383	19.6898	ENSMUSG00000099648	upstream	38264	Gm5975
chr1	52421699	52422473	775	0.00274598	0.99962	-0.00544916	0.999855	0.480363	0.143875	0.472168	0.255615	35.4116	25.2684	25.503	17.5707	29.9279	34.558	33.2348	22.1378	19.069	18.473	21.1075	22.3523	ENSMUSG00000065192	downstream	61122	Gm23460
chr1	52423637	52424137	501	0.108649	0.985118	0.0461798	0.996879	-0.539157	0.0974389	-0.601627	0.128213	27.3892	25.4382	25.4636	22.1325	40.7842	18.9916	28.5618	42.8064	36.3712	42.2924	40.072	39.7961	ENSMUSG00000065192	downstream	59458	Gm23460
chr1	52427955	52428177	223	0.164722	0.98248	-0.119325	0.996196	-0.142473	0.823695	-0.426519	0.516261	35.5001	26.4843	25.7837	15.7022	42.099	31.6054	40.6397	31.7781	45.682	29.9599	35.7251	43.9708	ENSMUSG00000065192	downstream	55418	Gm23460
chr1	52499660	52500989	1330	0.490082	0.572918	0.212626	0.97668	0.355196	0.137804	0.0777405	0.854917	31.7455	38.5631	54.0391	50.754	62.5596	59.0867	61.5055	40.9431	37.9737	43.2726	52.3925	40.7948	ENSMUSG00000065192	upstream	15957	Gm23460
chr1	52520281	52520592	312	0.380599	0.921145	-0.0458904	0.996879	-0.412923	0.353079	-0.839412	0.0784309	22.8361	18.9295	17.8528	22.4461	30.68	32.7552	17.581	37.0584	33.5707	36.4032	40.1739	23.0471	ENSMUSG00000002881	inside	19246	Nab1
chr1	52595405	52595941	537	0.217676	0.967544	-0.0469919	0.996879	-1.02006	0.00163529	-1.28473	0.000757951	13.2679	11.8664	15.057	12.3168	22.2816	12.4685	14.2117	32.2967	32.8642	31.1036	36.1988	26.1723	ENSMUSG00000099878	downstream	13232	Gm28178
chr1	52597324	52598110	787	0.217868	0.964252	-0.0528875	0.996879	-0.262111	0.52533	-0.532867	0.229228	17.7711	19.551	22.3744	13.3479	34.6174	22.8366	21.8187	26.3025	31.3578	27.8933	31.5833	23.2574	ENSMUSG00000099878	downstream	11063	Gm28178
chr1	52630444	52631154	711	-0.00363043	0.999513	-0.0530426	0.996879	-0.0084693	0.984917	-0.0578815	0.91225	65.3215	56.6161	63.1786	41.5878	71.4573	68.3984	65.0734	77.3751	51.2573	69.4013	66.3331	47.8093	ENSMUSG00000100007	downstream	6126	NA
chr1	52648276	52648391	116	0.832669	0.814226	-0.184899	0.99616	1.20176	0.0398935	0.184195	0.871443	15.924	20.0975	34.0772	45.2791	41.2593	45.569	37.0072	19.2918	22.2642	19.747	10.9885	28.1767	ENSMUSG00000043015	upstream	21471	Nemp2
chr1	52726388	52727542	1155	-0.320288	0.887536	0.281881	0.974375	-0.363506	0.245411	0.238663	0.584204	19.877	24.8943	27.3798	13.4741	24.544	23.4933	16.3123	22.2816	18.758	22.8899	24.8313	27.4497	ENSMUSG00000100302	downstream	13889	NA
chr1	52748386	52748612	227	0.410458	NA	-0.599881	0.978771	0.504885	0.558018	-0.505454	0.639208	2.32497	10.9548	15.8308	12.8546	9.73111	17.0767	14.7087	18.0737	10.7452	6.7273	8.89088	14.3987	ENSMUSG00000100302	upstream	4465	NA
chr1	52799472	52800555	1084	-0.284183	0.899571	-0.264077	0.97668	0.90871	0.000470908	0.928816	0.00257709	26.0476	22.0801	26.1895	19.0226	19.0193	25.6823	18.2608	15.1392	10.986	9.94938	11.857	10.5533	ENSMUSG00000100230	downstream	3184	NA
chr1	52816454	52817955	1502	0.0894701	0.975872	-0.0920474	0.991252	-0.147275	0.553638	-0.328793	0.206593	32.5024	29.8011	36.8452	31.2133	38.3602	35.6623	35.4084	46.6839	36.491	38.8256	41.1595	36.3408	ENSMUSG00000100230	downstream	20166	NA
chr1	52844514	52845648	1135	0.127561	0.965351	-0.225563	0.967526	0.0155528	0.962492	-0.337571	0.207768	99.0438	95.3066	111.607	82.6121	119.53	127.299	117.249	144.096	113.899	120.251	108.562	101.079	ENSMUSG00000026102	inside	11199	Inpp1
chr1	52951890	52953094	1205	0.0758075	0.990025	0.114921	0.995158	0.300907	0.411461	0.340021	0.45557	25.403	17.1543	17.4461	13.8837	21.2341	26.3203	22.9584	17.6428	13.8122	15.5244	14.4569	21.9708	ENSMUSG00000089802	upstream	38733	Gm16107
chr1	52963151	52963575	425	-0.100092	0.98866	0.79391	0.823121	1.82995	1.34248e-07	2.72395	1.12468e-09	46.5678	27.4272	58.3432	34.3293	42.8798	48.9214	38.7197	6.14311	7.08961	11.6778	8.99768	15.3812	ENSMUSG00000089802	upstream	49994	Gm16107
chr1	52972015	52972142	128	-0.402573	NA	0.610616	0.983547	1.59168	0.0213356	2.60487	0.00269631	37.1087	27.9272	40.7088	21.277	14.3813	46.8032	27.9481	7.28466	4.48376	10.4391	9.12851	5.10703	ENSMUSG00000089802	upstream	58858	Gm16107
chr1	52973146	52973536	391	0.0484828	0.995667	0.839326	0.936772	2.37648	1.20954e-07	3.16733	1.937e-07	22.9465	17.4898	48.2517	29.8516	23.5397	37.8537	32.3274	2.8617	3.66957	6.83484	5.43338	5.0156	ENSMUSG00000089802	upstream	59989	Gm16107
chr1	53079826	53080178	353	0.562276	0.853228	-0.395125	0.974375	0.205497	0.718587	-0.751905	0.165879	21.6789	17.6114	17.3063	14.3282	29.724	37.9354	30.4025	32.2258	30.8909	28.6601	26.7813	13.8888	ENSMUSG00000043629	upstream	20488	1700019D03Rik
chr1	53296674	53297467	794	0.029665	0.995667	-0.164914	0.986975	-0.175625	0.586702	-0.370204	0.284755	108.345	94.5445	131.479	67.6209	112.906	145.132	131.26	146.794	141.312	122.851	130.705	132.14	ENSMUSG00000026098	inside	38710	Pms1
chr1	53313173	53314031	859	-0.267898	0.893435	-0.275337	0.959708	-0.294646	0.282258	-0.302085	0.37263	47.6159	49.7564	52.2934	27.8551	45.8593	41.4347	51.0853	68.3859	54.9534	52.8884	51.9365	47.1821	ENSMUSG00000026098	inside	22146	Pms1
chr1	53352289	53352968	680	-0.0157586	0.995667	-0.314258	0.899615	-0.0192264	0.956032	-0.317726	0.269359	104.389	85.253	121.02	84.1067	101.244	104.684	119.947	141.237	116.894	97.2683	115.908	97.0937	ENSMUSG00000026096	overlapStart	185	Osgepl1
chr1	53784322	53785477	1156	0.0890803	0.984817	-0.171501	0.986975	0.0671784	0.864866	-0.193403	0.645525	73.9606	64.8036	83.6227	53.6816	83.7596	78.0402	100.059	90.9851	78.5666	85.2883	87.4774	51.1763	ENSMUSG00000096141	upstream	38379	Dnah7a
chr1	53813893	53814398	506	-0.10142	0.985118	-0.677026	0.577719	-0.417917	0.207429	-0.993523	0.00256963	37.0272	28.2584	26.9875	23.0671	35.2881	19.5004	34.4068	66.3393	55.2938	41.4972	37.7867	33.5893	ENSMUSG00000026094	inside	9985	Stk17b
chr1	53818212	53818828	617	-0.322039	0.934193	0.0089346	0.999855	-1.08054	0.00150586	-0.749568	0.0864899	15.8245	20.9075	11.3574	8.82806	17.3041	11.9942	13.1421	30.8293	23.487	28.6176	28.5785	23.8383	ENSMUSG00000026094	inside	5555	Stk17b
chr1	53823836	53824106	271	-0.402195	0.927715	-0.714656	0.827232	-0.246215	0.676967	-0.558676	0.331441	25.3173	22.3669	20.5538	12.921	14.9438	20.8059	21.1209	34.4072	32.2963	15.4964	24.3019	21.7096	ENSMUSG00000026094	inside	277	Stk17b
chr1	53909255	53909462	208	0.0379594	0.996169	-0.343565	0.987259	0.416074	0.551102	0.0345496	0.976186	13.9554	19.4276	25.9154	15.8993	21.24	18.6366	26.3716	28.6903	11.0369	13.7659	16.8526	15.7139	ENSMUSG00000087949	downstream	16525	Gm24251
chr1	53940188	53940900	713	-0.610903	0.794474	-0.308035	0.978918	-0.781357	0.0515018	-0.478489	0.377825	23.6867	10.8991	22.9325	10.095	10.8434	10.3792	18.3969	29.0324	23.9469	18.473	17.7286	29.3386	ENSMUSG00000087949	upstream	14088	Gm24251
chr1	54074169	54074954	786	0.0115733	0.998874	0.162841	0.989573	-0.651261	0.0251596	-0.499993	0.194918	27.1942	31.0446	26.7463	16.3348	28.8064	36.3161	34.2868	43.8933	36.509	37.6432	47.3001	50.7324	ENSMUSG00000102868	downstream	116602	NA
chr1	54187592	54187932	341	0.332955	0.938057	0.178008	0.993929	0.925581	0.0221639	0.770634	0.159339	23.9895	17.3196	24.2384	29.0943	19.9735	35.1367	26.5767	14.219	11.3606	16.5137	13.3946	12.4606	ENSMUSG00000102868	downstream	3624	NA
chr1	54194168	54195463	1296	0.157275	0.97184	0.125906	0.994356	0.696798	0.0236521	0.665429	0.0887814	27.2843	17.9885	28.5602	22.8156	24.7145	31.8139	30.5474	15.5406	15.3887	15.9809	11.1468	24.9677	ENSMUSG00000102868	overlapStart	87	NA
chr1	54250377	54251150	774	0.0527093	0.991026	-0.252646	0.974375	-0.0337998	0.932342	-0.339155	0.325052	119.327	101.807	118.394	71.8816	113.683	147.516	138.041	157.815	128.465	126.395	125.162	107.683	ENSMUSG00000042807	upstream	16050	Hecw2
chr1	54438558	54439320	763	0.0733989	0.990025	0.26493	0.978771	0.0659782	0.886017	0.25751	0.586741	28.3598	17.1106	22.8427	22.6912	22.6783	28.1735	21.8799	22.486	15.4199	25.3933	22.6924	18.8485	ENSMUSG00000041303	inside	3395	Gtf3c3
chr1	54523713	54524066	354	0.136707	0.978024	-0.406695	0.94952	0.627168	0.0577607	0.0837659	0.891607	43.9807	40.3919	43.1435	30.224	50.44	55.7469	51.8751	39.51	40.5311	25.3438	36.9079	27.6991	ENSMUSG00000109809	upstream	27791	NA
chr1	54557222	54558073	852	0.225497	0.929773	-0.0622506	0.996879	0.139253	0.676522	-0.148495	0.725054	42.7418	42.8685	53.5666	45.4366	61.5761	44.2568	65.221	57.347	45.8059	54.7793	54.358	36.8282	ENSMUSG00000104136	overlapEnd	304	NA
chr1	54729214	54729795	582	0.180726	0.950484	-0.0732924	0.99616	-0.162471	0.597564	-0.41649	0.184898	62.5705	60.3525	71.625	49.1345	83.5003	89.0083	74.1698	93.2436	80.1221	77.8964	82.6784	87.0477	ENSMUSG00000101674	inside	8326	NA
chr1	54741110	54741253	144	-0.106409	NA	-0.24063	0.995219	0.929118	0.205269	0.794897	0.398957	20.1578	17.269	36.1856	27.0184	16.6183	9.7889	36.4361	15.5406	12.9531	12.5933	11.8025	11.349	ENSMUSG00000101674	inside	20222	NA
chr1	54749535	54750230	696	0.211782	0.956019	0.304604	0.973622	-0.50922	0.0892279	-0.416398	0.300728	20.4738	18.0878	18.5876	24.5961	22.7455	16.2023	23.3008	23.3109	27.2118	25.3694	31.2868	38.9778	ENSMUSG00000102503	downstream	26095	NA
chr1	54765724	54766292	569	0.123166	0.98345	0.024626	0.997773	-0.383227	0.311225	-0.481767	0.288324	23.1884	28.6805	23.0521	22.5644	33.9691	19.8186	31.8546	23.9254	45.6413	37.0704	38.8301	29.8703	ENSMUSG00000102503	downstream	10033	NA
chr1	54789410	54790008	599	0.202814	0.970046	-0.299004	0.978523	-0.59383	0.100348	-1.09565	0.00485363	11.4541	14.2707	10.1989	14.2895	16.5949	12.9429	11.1481	24.5951	26.8277	18.0052	20.0387	26.1916	ENSMUSG00000102503	upstream	11676	NA
chr1	54799583	54799931	349	-0.655548	0.807409	-0.699968	0.842289	-0.434344	0.412014	-0.478765	0.421754	15.8784	25.3839	21.1085	8.9184	12.6588	18.1754	15.0338	22.9769	35.3562	20.2373	17.9574	14.9845	ENSMUSG00000102503	upstream	21849	NA
chr1	54810250	54810508	259	0.0411902	0.995667	-0.559343	0.883015	-0.282812	0.55281	-0.883346	0.0469211	44.8297	31.2042	22.8936	25.5371	44.0655	29.9336	33.1493	60.4823	59.2756	40.5359	48.3949	30.2873	ENSMUSG00000102503	upstream	32516	NA
chr1	54826601	54826853	253	0.311244	0.950484	0.39751	0.97519	0.202036	0.714979	0.288302	0.676274	20.8604	23.9582	22.7263	22.2982	35.6519	26.4648	27.3369	17.6905	19.2819	21.8804	25.1911	27.1298	ENSMUSG00000102503	upstream	48867	NA
chr1	54888125	54889062	938	-0.70176	0.822094	-0.00882718	0.999855	-0.623959	0.258122	0.0689731	0.943064	9.28377	8.78178	9.19471	6.22173	4.51369	3.75693	7.62763	8.7478	8.56598	6.00338	5.09597	16.3773	ENSMUSG00000102642	downstream	63942	NA
chr1	54925666	54926698	1033	-0.208107	0.90908	0.0923497	0.992281	-0.234657	0.316749	0.0657992	0.863466	52.6236	51.0046	49.7468	38.0403	42.0551	43.3251	53.7931	44.2298	53.1974	56.6379	48.0213	51.2582	ENSMUSG00000102642	downstream	26306	NA
chr1	55026955	55027749	795	0.386777	0.737845	0.144257	0.987259	0.314041	0.202123	0.0715214	0.868661	39.4996	41.6411	56.7292	65.3336	67.6118	54.9656	52.1979	41.9889	45.661	49.7027	51.842	42.7577	ENSMUSG00000025982	inside	2627	Sf3b1
chr1	55052331	55053345	1015	0.0785437	0.973902	0.120561	0.983547	0.0408775	0.868408	0.0828949	0.769802	122.453	140.262	150.294	135.31	153.793	133.669	159.072	134.859	125.669	143.777	150.386	129.13	ENSMUSG00000025982	inside	13295	Sf3b1
chr1	55087503	55088585	1083	0.439562	0.732474	0.304505	0.956385	0.23708	0.422754	0.102023	0.821203	57.7475	71.0373	101.371	116.935	113.202	80.0466	105.922	58.5463	84.5248	89.2746	98.9646	76.3555	ENSMUSG00000025981	upstream	3344	Coq10b
chr1	55130933	55131787	855	0.185289	0.926202	0.0973766	0.990887	0.218515	0.346069	0.130602	0.693509	56.7891	64.168	77.9664	73.7176	80.3063	66.7706	80.8916	58.6726	62.7621	73.3409	61.6215	58.8712	ENSMUSG00000025980	upstream	3531	Hspd1
chr1	55161466	55161615	150	-0.877219	NA	-0.890874	0.94547	0.278431	0.794109	0.264776	0.827319	26.3884	15.5421	27.5509	5.18754	13.4992	7.048	23.8491	21.1352	17.2176	8.27178	12.0386	10.895	ENSMUSG00000100736	upstream	1434	Gm5147
chr1	55186436	55186812	377	-0.305982	0.970368	0.103802	0.996879	-0.807366	0.182723	-0.397581	0.650777	6.29962	14.0167	13.3449	8.77203	5.85931	10.2822	12.652	15.3345	14.8428	12.6583	10.1433	28.6102	ENSMUSG00000061863	downstream	13094	NA
chr1	55201760	55202442	683	-0.0750897	0.990387	0.361414	0.973622	0.564259	0.103881	1.00076	0.0102588	25.8862	27.9894	34.4628	27.3428	21.5614	40.7608	24.0935	17.7477	11.9742	17.1882	16.33	24.8846	ENSMUSG00000061863	upstream	1548	NA
chr1	55226241	55226896	656	-0.194473	0.962487	0.129546	0.993049	-0.0788888	0.857325	0.24513	0.588276	28.9629	26.7722	27.1163	26.9855	26.6579	16.1159	25.0851	24.7323	21.872	27.2073	20.7264	29.3966	ENSMUSG00000061863	upstream	26029	NA
chr1	55236935	55237498	564	0.0842191	0.984224	-0.13526	0.989596	-0.167042	0.591352	-0.386522	0.233417	88.4293	81.0173	99.3975	71.3976	102.811	78.1029	126.857	122.672	111.681	111.182	117.9	88.6667	ENSMUSG00000097649	upstream	27912	Gm10561
chr1	55363348	55363973	626	-0.233789	0.966557	-0.205737	0.990061	-0.0304488	0.961099	-0.00239712	0.997253	14.3324	14.4	20.092	13.6732	10.5861	14.0735	17.5249	19.3637	13.5229	15.0941	10.6901	17.7522	ENSMUSG00000100215	upstream	10587	Gm8292
chr1	55383160	55383539	380	0.00177319	0.999671	-0.151866	0.992281	-0.11421	0.82043	-0.267849	0.616953	29.1661	22.4951	27.4248	28.668	22.2834	25.039	28.8699	24.047	38.5131	25.1167	30.4691	30.1046	ENSMUSG00000100215	downstream	8205	Gm8292
chr1	55405540	55406556	1017	-0.0339064	0.991951	0.0303761	0.996879	-0.45537	0.0093598	-0.391087	0.079914	66.4251	69.5345	66.077	64.8442	75.1163	65.1438	57.688	87.8342	88.8815	97.2267	95.0468	76.49	ENSMUSG00000025977	upstream	2912	Boll
chr1	55499957	55500382	426	0.277306	0.961436	-0.308967	0.978771	-1.02449	0.00418668	-1.61076	7.13437e-05	10.5306	12.0397	12.6535	14.6128	15.5561	9.92677	16.2353	44.6519	27.9551	28.4538	26.9297	32.9919	ENSMUSG00000100309	upstream	15774	NA
chr1	55501186	55501821	636	0.511105	0.794474	-0.0201137	0.998184	-0.619747	0.0465289	-1.15096	0.00103152	13.6921	10.9968	12.4307	15.9052	20.2604	16.6227	16.8743	30.788	23.9134	25.5117	31.0651	23.1262	ENSMUSG00000100309	upstream	17003	NA
chr1	55506493	55507340	848	-0.314184	0.936444	-0.33796	0.978612	-0.0115009	0.985415	-0.035277	0.962692	13.3809	15.5788	16.7391	6.65265	13.2416	16.6227	13.4995	16.4936	14.8895	9.11667	12.902	16.1883	ENSMUSG00000100309	upstream	22310	NA
chr1	55528731	55529866	1136	-0.0103326	0.998874	-0.134909	0.990495	-0.494659	0.0498016	-0.619236	0.0369588	43.4387	40.497	29.4194	26.5427	46.5062	32.5722	43.6673	59.0981	56.71	53.9391	55.636	48.0492	ENSMUSG00000100309	upstream	44548	NA
chr1	55570308	55570530	223	-0.330689	0.943914	-0.73849	0.783472	-0.557727	0.226866	-0.965528	0.0416443	42.6001	37.6356	19.3378	27.0426	31.3679	23.7041	21.3893	79.4452	49.5425	38.9478	37.1541	39.5738	ENSMUSG00000102831	upstream	28089	NA
chr1	55575917	55576403	487	0.0176167	0.997571	0.318652	0.974375	0.370992	0.301054	0.672027	0.0906667	78.5692	48.8284	70.47	39.5456	66.5259	68.0198	92.5559	35.6125	46.55	45.076	56.9283	52.3497	ENSMUSG00000102831	upstream	22216	NA
chr1	55584939	55585752	814	-0.355546	0.866278	0.0310676	0.996879	0.464647	0.142932	0.851261	0.0127659	32.4182	23.2941	28.2544	26.0492	23.0665	21.6462	15.8212	16.2661	14.63	16.6499	16.5728	13.2507	ENSMUSG00000102831	upstream	12867	NA
chr1	55600213	55600831	619	0.590608	0.791054	-0.046524	0.996879	0.171484	0.739492	-0.465648	0.389793	17.9049	14.814	7.25687	22.3131	19.3299	21.0643	16.5672	21.6916	14.8348	15.1106	17.8468	20.5931	ENSMUSG00000102831	overlapEnd	1	NA
chr1	55666357	55666610	254	-0.185686	0.984078	-0.773069	0.889413	0.0423383	0.961253	-0.545045	0.46685	12.467	23.252	22.6369	9.95639	12.3203	19.4236	29.1071	33.0391	24.8548	12.7759	17.5644	21.8758	ENSMUSG00000102831	downstream	66143	NA
chr1	55807153	55807432	280	-0.175112	0.985118	-0.293167	0.989573	-0.407939	0.514641	-0.525994	0.466039	27.3309	12.2116	12.8343	12.5057	14.4634	22.6543	11.9245	25.309	23.5717	21.8157	23.1414	12.8405	ENSMUSG00000099950	upstream	162968	9130227L01Rik
chr1	55838322	55838428	107	0.337287	NA	0.487473	0.983547	-0.278059	0.762453	-0.127873	0.92568	19.7297	15.9779	13.434	21.8167	15.4834	23.0542	22.2888	20.9145	14.7503	26.7599	18.862	30.5467	ENSMUSG00000099950	upstream	131972	9130227L01Rik
chr1	55874245	55874428	184	0.235927	0.97301	1.01513	0.708478	-0.029311	0.968445	0.749893	0.259321	34.4197	29.5638	21.4835	30.66	23.01	45.9652	36.2921	11.1487	21.8339	33.7165	31.7513	37.3035	ENSMUSG00000099950	upstream	95972	9130227L01Rik
chr1	56089493	56089844	352	-0.165838	0.984078	-0.519815	0.973622	0.987635	0.0484436	0.633659	0.349574	42.7312	15.4538	34.7109	16.5795	28.2396	43.0489	23.036	23.3109	16.3046	12.2016	10.5619	20.4281	ENSMUSG00000100372	downstream	30131	1700003I22Rik
chr1	56971688	56973628	1941	0.1442	0.952311	0.0555039	0.99616	0.0872676	0.748256	-0.00142855	0.996918	21.3446	21.3794	24.7164	22.1493	23.8991	28.8674	25.1883	23.443	21.6588	24.3403	22.6017	23.2382	ENSMUSG00000087022	upstream	36943	Gm38484;9130024F11Rik
chr1	57224628	57225063	436	0.0824268	0.994174	-0.289694	0.990735	-0.750763	0.242908	-1.12288	0.119474	7.86811	10.3376	5.76954	13.3853	9.28845	2.42477	7.65796	20.9584	14.1506	15.9802	19.2468	5.99725	ENSMUSG00000101429	downstream	14741	BC055402
chr1	57302569	57302706	138	0.29299	NA	-0.617109	0.983677	-1.64016	0.141044	-2.55026	0.0383879	3.82441	3.37872	2.60406	7.04828	5.33566	2.55362	0	25.6758	12.4765	13.1408	15.3946	7.10543	ENSMUSG00000101129	downstream	27878	NA
chr1	57377412	57378260	849	0.0441531	0.992829	-0.233385	0.978197	-0.0432805	0.913697	-0.320819	0.372397	44.4469	44.8506	65.1843	38.4941	58.5414	57.2806	58.9906	74.0238	55.0937	56.2094	60.1803	46.9678	ENSMUSG00000097519	downstream	20121	4930558J18Rik
chr1	57406086	57407225	1140	-0.360725	0.797765	-0.102185	0.993214	-0.0953892	0.781548	0.16315	0.669986	32.4068	26.9942	28.6858	18.7707	21.3145	23.1842	28.2423	29.1182	23.2841	25.033	24.0399	23.797	ENSMUSG00000097519	inside	7705	4930558J18Rik
chr1	57428974	57430414	1441	0.0187843	0.995721	-0.0231427	0.996879	-0.46772	0.0762527	-0.509647	0.111765	17.9463	16.1784	14.2148	20.6547	17.2455	12.4722	13.9023	22.9065	22.8015	25.434	19.9029	22.0017	ENSMUSG00000038323	downstream	4392	1700066M21Rik
chr1	57436447	57437266	820	0.111894	0.984078	-0.184719	0.988592	-0.30371	0.406336	-0.600323	0.120543	17.6995	12.32	15.1194	11.3873	16.6121	16.3307	20.359	23.8795	21.3471	18.7395	19.1719	22.3215	ENSMUSG00000025971	upstream	8221	Maip1
chr1	57469958	57470194	237	0.0581149	0.995667	-0.46245	0.974375	-0.484839	0.387458	-1.0054	0.0799749	16.7015	29.5103	13.6466	15.5954	26.4081	10.4084	30.1887	43.2776	38.1403	31.0091	27.34	30.3405	ENSMUSG00000077776	upstream	8426	Gm22371
chr1	57615282	57615543	262	-1.07467	0.733469	-0.0158146	0.999855	0.673934	0.385723	1.73279	0.0222278	41.2949	37.9654	17.145	5.19744	16.8623	13.4504	25.4875	13.5239	6.02398	8.01435	14.19	4.99008	ENSMUSG00000119591	downstream	6547	NA
chr1	57774104	57775534	1431	0.0498354	0.990604	0.121726	0.989596	-0.0516189	0.876688	0.0202717	0.964183	31.7177	27.8042	26.6193	27.7321	24.6984	37.9243	29.3322	28.8006	27.6733	32.0813	32.3641	26.952	ENSMUSG00000038305	upstream	37787	Spats2l
chr1	57849220	57849391	172	-0.0648059	0.993793	-0.592577	0.929794	0.160739	0.800366	-0.367032	0.575442	47.5605	32.53	38.6521	26.0131	41.7391	43.0256	40.2106	50.9587	50.0512	28.3001	25.3205	53.2081	ENSMUSG00000038305	inside	35899	Spats2l
chr1	57849908	57850293	386	0.0663265	0.98866	-0.161298	0.983677	0.0482168	0.893986	-0.179407	0.629768	63.5783	68.047	63.7724	70.5559	60.0883	67.5586	75.3779	77.3004	70.625	64.2884	75.9519	55.0395	ENSMUSG00000038305	inside	36587	Spats2l
chr1	57852725	57853219	495	-0.0410022	0.995667	0.349988	0.96932	-1.25897	4.08998e-05	-0.867979	0.0284336	15.993	19.7808	14.8826	20.8287	18.2221	15.6622	10.5996	31.2696	30.7251	34.1283	39.0556	46.8815	ENSMUSG00000038305	inside	39404	Spats2l
chr1	57862077	57862413	337	-0.80806	0.866532	0.000106226	0.999978	-0.135119	0.896389	0.673046	0.486374	20.359	14.2969	7.46445	5.19523	5.46232	14.6398	7.78456	11.6209	5.9606	6.23074	6.30401	15.5181	ENSMUSG00000119067	upstream	42485	NA
chr1	57868740	57869167	428	-0.115633	0.98993	-0.262261	0.989573	0.113092	0.872362	-0.0335366	0.971748	15.4138	23.9668	16.7925	7.72676	21.0746	27.9944	14.4877	23.093	15.756	14.7179	15.8838	18.328	ENSMUSG00000119067	upstream	35731	NA
chr1	57905774	57906135	362	-0.294675	0.962039	-0.201071	0.992342	0.265581	0.653545	0.359185	0.599692	25.5137	23.1843	16.3797	17.1963	13.7297	20.4431	19.7644	17.0002	16.6469	14.5011	9.38984	22.5725	ENSMUSG00000119067	downstream	775	NA
chr1	57969393	57970325	933	0.156638	0.943914	0.0250659	0.996879	-0.0889494	0.750173	-0.220522	0.453673	54.587	50.9741	57.7749	47.5385	63.333	61.9439	70.2947	62.9619	63.8202	65.4704	68.5381	58.5037	ENSMUSG00000091283	upstream	13123	NA
chr1	57988995	57989896	902	0.145138	0.969197	-0.322597	0.949525	-0.354682	0.206938	-0.822416	0.00493693	83.378	88.5658	94.2224	66.4258	101.02	84.7792	140.397	167.26	146.821	125.918	148.5	100.736	ENSMUSG00000091283	upstream	32725	NA
chr1	57995668	57996219	552	-0.0304308	0.995667	0.13416	0.990735	0.104627	0.781618	0.269218	0.496076	42.5465	54.341	76.4942	52.8621	59.0257	58.095	57.8945	53.0407	43.6679	44.6095	61.5783	52.6986	ENSMUSG00000026039	upstream	38911	Sgo2a
chr1	58029449	58030169	721	-0.206204	0.926791	-0.13723	0.987362	-0.302178	0.217768	-0.233204	0.474553	69.9055	65.1	63.2992	49.9147	63.8281	57.1856	57.8861	80.4404	74.8246	79.5584	78.3778	50.3195	ENSMUSG00000026039	upstream	4961	Sgo2a
chr1	58031284	58031390	107	-0.294106	0.970331	-0.150484	0.99616	-0.38132	0.571195	-0.237697	0.790946	24.6621	52.2912	36.9436	39.9974	32.6871	19.7608	31.2044	48.8004	42.91	39.2478	50.6295	30.5467	ENSMUSG00000026039	upstream	3740	Sgo2a
chr1	58056494	58057231	738	-0.0988804	0.985118	-0.826115	0.438822	0.910408	0.00278864	0.183173	0.719913	19.6662	20.2174	26.0512	18.7152	20.9522	23.3978	19.7126	16.6777	21.9692	8.79426	12.81	11.515	ENSMUSG00000054770	inside	884	Kctd18
chr1	58101368	58102028	661	0.593196	0.715432	0.27493	0.978771	-0.13269	0.762882	-0.450957	0.312196	11.5774	17.1645	16.038	19.7181	26.7348	27.1897	18.0401	22.5703	18.8847	21.5145	28.7653	24.7239	ENSMUSG00000063558	inside	32278	Aox1
chr1	58112911	58113191	281	0.0673147	0.993178	0.445791	0.974375	0.0921721	0.888935	0.470648	0.473516	19.7209	19.9116	23.6589	25.6146	16.3772	21.3196	25.4616	18.5824	12.2545	17.6622	22.303	23.2633	ENSMUSG00000064294	upstream	39098	Aox3
chr1	58237827	58238445	619	0.030497	0.995667	0.0172373	0.998647	-0.553445	0.11641	-0.566705	0.194298	14.4944	27.8703	14.804	17.9133	24.6828	18.2178	17.7231	30.7297	26.6563	25.9039	31.2318	30.0976	ENSMUSG00000038242	upstream	11111	Aox4
chr1	58291830	58292154	325	-0.551526	0.894675	-0.151936	0.995624	-0.458756	0.450328	-0.0591658	0.952913	26.7944	26.7802	22.1145	26.3367	18.6912	5.42154	16.144	33.8546	18.9835	34.3597	16.3419	19.1081	ENSMUSG00000079554	upstream	25331	Aox2
chr1	58296447	58296574	128	-0.0101958	0.999378	-0.0570269	0.996879	0.135234	0.85026	0.0884033	0.926212	22.6775	50.9975	47.7275	45.5936	34.515	44.05	40.9906	49.5357	29.1444	38.774	40.6633	30.6422	ENSMUSG00000079554	upstream	20911	Aox2
chr1	58304053	58304645	593	-1.00102	0.695436	-0.571198	0.974375	1.31631	0.0220266	1.74614	0.00624974	26.2549	18.8707	33.6332	9.84145	7.76054	23.1764	12.8696	9.43443	6.29087	1.77045	4.83644	11.0236	ENSMUSG00000079554	upstream	12840	Aox2
chr1	58341497	58342050	554	-0.45997	0.937092	-0.469743	0.980462	1.36813	0.018004	1.35836	0.0494089	27.6269	10.0996	19.1356	11.5877	9.30369	14.6303	19.372	5.72253	8.80564	4.99615	1.91738	10.6197	ENSMUSG00000089822	inside	12765	NA
chr1	58359307	58360052	746	-0.63449	0.726768	-0.167307	0.993049	0.993917	0.00573956	1.4611	0.000313718	41.3867	24.584	32.275	19.2968	12.8313	29.7603	23.3376	11.4992	12.117	10.4911	8.1162	14.0204	ENSMUSG00000089822	upstream	4492	NA
chr1	58392259	58393839	1581	0.0669327	0.985118	0.133922	0.9853	-0.0449917	0.880714	0.0219975	0.957209	37.7216	38.8307	46.0281	45.2802	46.5731	41.6817	37.5611	41.5202	39.1145	51.1327	42.9997	37.4193	ENSMUSG00000103839	downstream	28832	NA
chr1	58422941	58424337	1397	0.123581	0.973902	0.162877	0.987259	0.0410128	0.919862	0.080309	0.869446	29.0896	31.7072	27.0099	42.1928	34.5233	24.721	25.266	24.6959	30.6064	33.6136	33.9122	24.5664	ENSMUSG00000103839	inside	270	NA
chr1	58445117	58445806	690	-0.20243	0.926791	-0.266328	0.956385	-0.110411	0.714721	-0.174309	0.611259	54.3066	70.5026	53.6436	51.3115	46.687	56.1797	54.2653	64.5948	70.0766	63.6291	55.5744	46.8959	ENSMUSG00000051223	inside	706	Bzw1
chr1	58504479	58505245	767	-0.238267	0.857177	-0.0944931	0.990735	-0.312092	0.109003	-0.168318	0.547068	76.3785	67.8827	77.3069	58.0808	61.92	67.0801	63.7426	75.6161	89.792	83.1243	74.7851	74.1485	ENSMUSG00000119442	downstream	429	NA
chr1	58585550	58586788	1239	-0.062018	0.989375	0.14299	0.987259	0.0174528	0.962375	0.222461	0.516659	33.0121	22.5793	31.1793	24.4932	28.2286	29.8644	27.9105	24.2328	25.0135	26.0371	26.1484	30.0734	ENSMUSG00000038174	inside	23585	Fam126b
chr1	58613904	58614072	169	0.0907436	0.995667	-0.0208906	0.999855	-0.156804	0.929164	-0.268438	0.900018	179.566	83.6882	66.9813	86.331	35.9446	223.117	124.184	128.003	136.688	54.7812	26.3985	313.312	ENSMUSG00000038174	inside	11410	Fam126b
chr1	58652474	58653218	745	-0.356089	0.887848	-0.514682	0.842509	-0.168918	0.691946	-0.327511	0.464484	21.6066	21.0705	23.3946	13.317	23.9675	12.2985	18.2469	26.5338	28.696	21.651	17.68	18.4264	ENSMUSG00000100202	downstream	11155	Gm29389
chr1	58697717	58697869	153	-0.0205144	0.998874	-0.0162817	0.999855	-0.0163136	0.985558	-0.0120808	0.991242	25.871	14.2215	28.1851	24.1576	22.8596	20.7294	20.2639	20.7208	24.3823	21.8335	23.605	21.3627	ENSMUSG00000102059	downstream	2727	Gm20257
chr1	58711401	58713782	2382	-0.0541768	0.988254	0.0185651	0.996879	0.127336	0.584341	0.200078	0.454232	33.6779	28.8397	29.3432	34.6271	27.5116	29.1448	26.232	26.5404	26.624	26.0847	27.2469	27.5805	ENSMUSG00000102059	downstream	16411	Gm20257
chr1	58723941	58724509	569	-0.413034	0.889825	-0.0751056	0.996879	-0.796074	0.0262432	-0.458145	0.352774	23.6522	21.5787	18.3154	19.8293	18.4404	9.90932	13.8316	28.1861	29.7551	22.8125	22.2153	40.21	ENSMUSG00000047528	inside	10639	Flacc1
chr1	58725793	58726109	317	-0.411214	0.926791	-0.139619	0.995219	-0.337922	0.545626	-0.0663273	0.940029	34.1301	44.6161	24.9398	15.9554	33.0996	23.3451	31.5981	31.1792	41.1883	21.0759	27.4771	54.6468	ENSMUSG00000047528	inside	9039	Flacc1
chr1	58742626	58742830	205	-0.515814	0.940885	-0.565878	0.975791	-0.631075	0.400466	-0.68114	0.437714	18.0214	21.2282	19.2827	2.84682	10.7754	10.3142	31.411	29.1102	33.5954	20.4855	18.6537	25.5102	ENSMUSG00000101046	inside	315	NA
chr1	58744440	58745135	696	0.192298	0.973179	-0.196469	0.990495	-0.665845	0.0850732	-1.05461	0.0147724	14.7866	16.9713	9.29379	20.9626	19.8362	7.08851	13.021	27.33	29.4794	23.0381	23.8085	28.1767	ENSMUSG00000101046	downstream	1295	NA
chr1	58795117	58795971	855	0.0197134	0.995667	0.0219274	0.997162	-0.185994	0.587944	-0.18378	0.67263	23.765	23.9948	19.7543	20.7046	21.5298	26.7907	22.8728	23.7744	27.1857	25.34	21.2445	32.8761	ENSMUSG00000100236	upstream	28397	NA
chr1	58802493	58802641	149	0.341237	0.976471	-0.311781	0.993049	-0.877751	0.284818	-1.53077	0.0903466	30.1076	10.4309	3.61772	28.7229	21.0024	18.9208	1.60061	37.5478	43.3329	29.4658	39.2097	28.5171	ENSMUSG00000100236	upstream	21727	NA
chr1	58856583	58857270	688	-0.151606	0.969197	-0.355437	0.927428	-0.315303	0.293644	-0.519134	0.106581	23.3967	24.3975	26.6386	22.6201	24.0802	16.3907	25.305	36.0506	35.2444	27.884	27.0188	28.9794	ENSMUSG00000102719	downstream	15801	NA
chr1	58859335	58860223	889	-0.000806702	0.999671	-0.0444657	0.996879	-0.526391	0.0916943	-0.57005	0.131867	18.4036	18.7065	12.9353	13.7858	20.7064	17.838	14.2182	23.7042	25.6618	20.5059	22.5828	30.1481	ENSMUSG00000102719	downstream	18553	NA
chr1	58951106	58951908	803	-0.285334	0.920262	-0.260851	0.978743	-0.192722	0.61825	-0.168239	0.730866	28.9188	17.4195	20.586	15.02	17.6515	18.8707	21.087	25.7784	23.7645	18.0665	21.6943	22.794	ENSMUSG00000099719	upstream	19155	NA
chr1	58961296	58961731	436	-0.129668	0.985118	-0.231806	0.987259	-0.239127	0.634011	-0.341266	0.551556	19.3676	14.6153	15.6602	16.9547	14.7771	16.1651	12.0339	23.9525	17.7705	18.826	17.785	15.7428	ENSMUSG00000099719	upstream	29345	NA
chr1	58972921	58974158	1238	0.207937	0.887536	0.0432233	0.996879	0.209306	0.316873	0.0445922	0.900632	43.6965	46.0739	53.9911	60.8111	55.0159	54.084	51.628	45.7933	47.2859	50.0347	50.2798	42.5063	ENSMUSG00000026028	inside	33313	Trak2
chr1	59119628	59120519	892	0.343711	0.717312	-0.150496	0.979376	0.335716	0.0869725	-0.158492	0.592458	53.8418	57.4988	49.553	65.2077	63.974	72.2974	71.6541	65.8559	54.2072	58.4218	51.8014	50.9329	ENSMUSG00000077616	downstream	9351	Gm25502
chr1	59236824	59238141	1318	0.10931	0.973902	0.0894083	0.993929	0.0332452	0.925445	0.0133433	0.977303	24.8267	32.9002	34.8999	40.8843	31.8439	31.5502	29.3137	31.9773	29.6105	33.3835	30.0615	35.2145	ENSMUSG00000079550	upstream	34276	Mpp4
chr1	59256628	59257351	724	-0.457867	0.822094	0.242615	0.983547	0.173081	0.697016	0.873563	0.0240491	30.2519	24.2577	36.482	17.1963	19.3233	29.2044	23.7173	13.6517	19.2232	17.2695	16.8724	26.1841	ENSMUSG00000026024	inside	19039	Als2
chr1	59270207	59270724	518	-0.0142721	0.998874	0.505232	0.970404	-0.612722	0.238119	-0.093218	0.921914	5.60372	13.5018	10.4062	10.1397	10.661	8.16371	10.5894	11.8805	9.69461	13.082	11.2785	23.3464	ENSMUSG00000026024	inside	5666	Als2
chr1	59315061	59315351	291	0.144036	0.98939	0.650409	0.963509	0.607471	0.327967	1.11384	0.122805	27.2046	17.091	11.7317	14.7069	16.447	23.009	27.8649	6.4085	10.3542	13.7754	8.03058	20.2175	ENSMUSG00000026023	inside	18996	Cdk15
chr1	59340743	59341490	748	0.122542	0.979111	-0.623439	0.665066	0.0359516	0.938177	-0.71003	0.0358387	20.4616	21.4015	21.379	19.5053	20.426	29.6808	23.594	29.9177	38.9391	21.6917	18.7452	28.4027	ENSMUSG00000026023	inside	44678	Cdk15
chr1	59382613	59383518	906	-0.0498577	0.994522	0.410292	0.965686	-1.09259	0.00180214	-0.63244	0.19624	17.767	23.1588	9.12283	22.1157	18.8956	12.8358	10.0029	26.9645	24.8636	32.1306	42.6766	27.7786	ENSMUSG00000099922	upstream	34571	NA
chr1	59391675	59392100	426	-0.470458	0.845883	-0.265236	0.979248	-0.78098	0.0230943	-0.575758	0.188021	24.7779	40.497	24.8853	15.5261	22.0378	20.6808	29.6714	41.1498	49.174	37.8638	32.6647	43.7334	ENSMUSG00000099922	upstream	25989	NA
chr1	59426465	59426812	348	0.482764	0.910976	0.0831211	0.996879	0.259864	0.684839	-0.139779	0.881103	8.34117	19.2043	13.4244	25.1551	15.869	22.2782	15.077	15.5406	15.2551	11.5191	14.6514	25.359	ENSMUSG00000099922	inside	4646	NA
chr1	59434178	59434453	276	0.323743	0.929489	-0.1745	0.990887	0.431394	0.28547	-0.0668486	0.925797	33.4636	35.4765	24.0875	37.3559	43.3522	39.5812	34.5639	33.7839	31.1913	34.581	27.7102	21.3163	ENSMUSG00000099922	downstream	2720	NA
chr1	59444248	59444423	176	-0.146473	0.990387	0.938531	0.937132	0.486334	0.550392	1.57134	0.0617197	37.4836	15.8953	30.6273	11.053	16.7346	32.0364	42.0069	4.23835	13.8589	14.6419	15.0884	25.9994	ENSMUSG00000099922	downstream	12790	NA
chr1	59457763	59458221	459	0.295128	0.931075	-0.0751113	0.996879	0.285013	0.483192	-0.0852259	0.895005	21.8466	38.6013	22.3132	36.4484	40.9067	30.7103	28.0577	34.5347	25.0074	29.3193	28.2335	26.3474	ENSMUSG00000104502	downstream	28803	NA
chr1	59481432	59482910	1479	0.196103	0.88492	0.125299	0.983547	0.075544	0.747126	0.00474025	0.988977	45.3189	44.5561	55.3983	56.0317	57.2528	56.2315	52.5679	48.4186	48.2148	51.626	53.8654	52.5965	ENSMUSG00000104502	downstream	4114	NA
chr1	59487665	59487814	150	0.123271	0.98866	-0.0557285	0.996879	0.248932	0.659744	0.069932	0.935668	35.1846	48.6986	32.3424	40.2034	36.816	46.9867	47.6981	29.838	44.0006	37.5412	37.532	30.506	ENSMUSG00000104502	inside	641	NA
chr1	59508481	59509042	562	-0.342856	0.926791	0.168067	0.990887	-0.987864	0.00412906	-0.476941	0.331507	16.4341	20.4647	11.5098	13.8457	15.3946	9.4057	11.4577	24.2234	20.9348	28.3614	25.1381	21.5186	ENSMUSG00000041075	upstream	12541	Fzd7
chr1	59516011	59516911	901	-0.283718	0.901237	-0.383292	0.899287	-0.201278	0.548889	-0.300853	0.422397	29.5808	31.0497	19.5434	21.3748	24.7211	19.9472	21.1756	36.4281	29.4604	23.6226	25.8188	26.4817	ENSMUSG00000041075	upstream	4672	Fzd7
chr1	59579944	59580612	669	0.179924	0.970882	0.0637016	0.996879	1.12279	0.000898911	1.00657	0.0192789	21.3001	23.2318	21.755	36.6384	21.1871	17.9097	23.5282	12.2652	9.8656	13.2679	8.57402	13.1913	ENSMUSG00000101409	upstream	3556	NA
chr1	59623059	59623634	576	0.553373	0.856169	0.0369351	0.996961	0.290159	0.584541	-0.226279	0.756523	10.9952	14.5707	7.48667	23.3034	11.8246	14.6833	14.9057	12.9505	12.9531	13.7532	10.5116	16.456	ENSMUSG00000099811	upstream	34379	NA
chr1	59669978	59671159	1182	0.128737	0.97698	0.128876	0.993049	-0.192044	0.612048	-0.191904	0.6913	27.46	29.4537	17.0255	34.2325	20.8686	25.6399	26.8352	27.4524	28.7689	36.5786	33.071	21.2923	ENSMUSG00000103821	downstream	14200	NA
chr1	59684566	59685239	674	0.359853	0.866377	0.313802	0.973622	0.129821	0.747797	0.0837691	0.882008	28.5809	39.6623	33.0569	50.2206	51.0727	36.0766	35.7382	24.3485	39.3825	40.6414	46.6497	30.5513	ENSMUSG00000103821	downstream	120	NA
chr1	59739335	59740146	812	0.14324	0.985118	0.596784	0.956385	1.13849	0.0105396	1.59203	0.00339611	13.9742	15.3124	16.1535	18.2075	12.2418	18.6616	18.2099	5.51194	4.59419	5.52445	3.79366	15.6985	ENSMUSG00000089512	upstream	3271	Gm26287
chr1	59762808	59764149	1342	0.222199	0.901237	0.329718	0.883015	0.252827	0.285016	0.360346	0.19722	39.327	47.2517	36.9536	56.6783	47.0488	45.1661	43.1842	27.5145	36.565	42.7434	41.2384	36.5332	ENSMUSG00000089093	downstream	18776	NA
chr1	59764681	59764885	205	-0.1787	0.976471	0.128445	0.995219	-0.196364	0.716409	0.110782	0.882646	29.6065	42.4565	31.5536	37.9576	28.7345	29.2234	26.7575	30.9296	33.5954	34.4528	33.1622	39.8597	ENSMUSG00000089093	downstream	20649	NA
chr1	59780886	59781325	440	-0.940614	0.597227	-0.198853	0.993929	0.704503	0.183952	1.44626	0.00667992	20.9908	21.9002	23.2767	15.0321	8.36728	8.0091	14.0926	8.05286	8.15228	5.85677	9.41519	5.19989	ENSMUSG00000067336	upstream	21234	Bmpr2
chr1	59826315	59826732	418	-1.03914	0.790359	-0.578955	0.983547	1.82873	0.014611	2.28891	0.00559317	27.7773	15.2446	13.3256	11.6347	7.92689	14.3321	2.85276	5.3537	2.40278	0.685002	2.79533	5.47356	ENSMUSG00000104052	upstream	13690	NA
chr1	59886948	59887240	293	-0.180901	0.985118	-0.817335	0.853343	-0.64645	0.294016	-1.28288	0.0348609	9.00629	13.7916	8.58539	10.6229	9.4239	6.01366	10.5815	21.0037	30.361	11.7269	18.4893	13.3863	ENSMUSG00000103131	downstream	38888	NA
chr1	59912501	59913276	776	0.105017	0.970331	-0.0783681	0.993929	-0.0407119	0.891029	-0.224097	0.424325	57.1296	68.6977	61.3598	73.2004	59.5414	70.3892	66.6913	66.0876	79.8756	71.4597	71.5908	63.601	ENSMUSG00000103131	downstream	12852	NA
chr1	60000333	60000507	175	-0.679159	NA	0.440655	0.98867	0.997961	0.154301	2.11777	0.00641164	37.6977	16.8743	31.829	13.3394	18.934	20.1372	19.0793	7.45949	5.73921	7.63549	6.67685	14.9417	ENSMUSG00000100901	upstream	8710	Gm18829
chr1	60097521	60099059	1539	0.196119	0.920262	0.253954	0.956385	0.228783	0.335888	0.286617	0.324065	30.5207	32.0133	32.1066	46.1367	31.8163	33.6601	32.6975	26.0525	25.7313	32.0006	30.6451	29.7329	ENSMUSG00000026018	upstream	15178	Ica1l
chr1	60158419	60158737	319	0.0701619	0.991802	0.129626	0.995158	-0.0390489	0.946619	0.0204157	0.978852	29.78	38.0026	21.9671	34.7597	24.8133	30.9317	35.8857	30.9838	28.3362	26.6285	31.3007	42.0089	ENSMUSG00000082609	downstream	1575	Gm15464
chr1	60180119	60181047	929	0.239277	0.89839	0.130821	0.989573	0.210531	0.429082	0.102075	0.795906	59.3668	74.1135	104.443	109.307	88.1762	88.7639	89.081	80.4966	67.9562	83.2178	83.1258	76.6989	ENSMUSG00000082609	downstream	23275	Gm15464
chr1	60342872	60343707	836	0.180994	0.936444	0.170219	0.979376	-0.0866283	0.775525	-0.0974034	0.797573	47.6633	63.7672	40.8364	55.3813	57.2498	61.5436	57.3405	50.8601	58.0099	64.6185	58.9561	60.2092	ENSMUSG00000100516	upstream	36085	Gm29332
chr1	60408963	60410244	1282	0.326981	0.829541	0.321367	0.937132	0.30854	0.241411	0.302927	0.376228	32.5224	42.5529	43.8688	65.8558	41.3534	51.1283	41.2987	31.7116	32.7923	36.7778	45.6542	38.243	ENSMUSG00000103822	downstream	15628	NA
chr1	60566466	60567344	879	0.095842	0.976613	0.254731	0.958744	0.0012925	0.99738	0.160181	0.648079	64.8453	62.0623	83.6054	84.0983	73.7158	56.5284	84.3806	55.5855	69.8629	77.2018	73.5945	73.9967	ENSMUSG00000081562	upstream	4241	NA
chr1	60573243	60573477	235	-1.45695	NA	0.57394	0.986975	0.736408	0.441522	2.76729	0.00286121	34.8103	14.55	15.2919	7.45018	7.04988	5.9983	10.1485	3.17425	3.05277	5.27986	1.80804	8.3451	ENSMUSG00000084400	upstream	2702	NA
chr1	60593073	60593439	367	0.166427	0.984839	0.467199	0.97519	0.0695899	0.928328	0.370362	0.639843	12.2235	20.751	14.1981	25.443	17.0537	18.2442	10.3974	9.14651	15.2472	13.7834	14.4717	24.9368	ENSMUSG00000026014	inside	12824	Raph1
chr1	60598941	60599616	676	0.370888	0.930882	-0.106164	0.996615	-0.463084	0.312196	-0.940135	0.0551789	13.6626	15.1742	10.1004	21.8705	23.9631	7.29823	12.3479	22.3454	27.3801	28.5201	21.6845	18.3732	ENSMUSG00000026014	inside	6647	Raph1
chr1	60617007	60617229	223	-0.0931462	0.993006	0.497313	0.978743	-0.492867	0.461036	0.0975921	0.931062	21.3001	16.03	11.2804	14.8298	11.5566	15.8027	18.1809	15.0528	14.7984	16.2639	15.719	35.1767	ENSMUSG00000026014	upstream	10744	Raph1
chr1	60641329	60642033	705	0.498556	0.866278	0.36309	0.978743	0.207287	0.698284	0.0718206	0.930666	8.98329	14.1091	13.5079	21.2468	14.8831	22.9935	11.1634	8.20015	15.0603	13.5381	18.6831	12.5177	ENSMUSG00000103215	upstream	5934	NA
chr1	60652824	60653053	230	-0.279705	0.957857	0.0048128	0.999855	-0.490826	0.270921	-0.206308	0.755911	43.5983	32.4357	30.4675	28.757	39.2171	29.1113	17.6276	36.4866	44.2917	35.2726	45.7219	41.2115	ENSMUSG00000103215	upstream	17429	NA
chr1	60668400	60668566	167	0.0637212	0.995506	-0.488107	0.974375	0.410209	0.519879	-0.14162	0.881961	22.122	26.9893	33.3538	27.9568	39.6819	33.7629	14.2809	35.7341	25.7749	24.0038	20.9901	19.5719	ENSMUSG00000103215	upstream	33005	NA
chr1	60670588	60670746	159	-0.179366	0.984078	-0.110625	0.996879	-0.913693	0.0639299	-0.844952	0.162882	19.9158	35.1897	25.9914	25.693	28.9434	11.0818	28.4989	38.7049	59.5578	46.2211	53.4453	34.9462	ENSMUSG00000103215	upstream	35193	NA
chr1	60715398	60716177	780	0.105378	0.983781	0.528657	0.858	0.812906	0.00447502	1.23618	0.000366826	23.6819	22.3169	23.727	32.1727	19.116	24.3969	24.1548	9.56345	10.1172	14.0718	12.9374	16.3425	ENSMUSG00000084151	upstream	23854	NA
chr1	60778240	60778995	756	0.310691	0.940885	0.841053	0.783472	1.21389	0.00117417	1.74426	0.000244875	18.1508	16.4467	14.9733	29.8489	13.1486	25.6376	13.5649	4.68685	5.12429	9.72111	8.28986	8.21448	ENSMUSG00000026012	inside	22281	Cd28
chr1	60825791	60826144	354	-0.191352	0.973902	-0.726326	0.796592	0.552482	0.209952	0.0175068	0.982373	26.8357	27.6597	37.5602	26.3773	29.12	21.9006	29.6429	32.1348	28.7771	17.7946	11.4024	29.5458	ENSMUSG00000086795	upstream	4798	NA
chr1	60846810	60847157	348	-0.603368	0.846026	-0.347576	0.978918	-0.509203	0.328416	-0.253411	0.726416	25.0235	18.7577	25.8161	6.14902	21.6876	15.1897	17.8183	30.0094	25.1503	24.6837	19.23	20.6629	ENSMUSG00000083355	upstream	1118	NA
chr1	60860712	60861261	550	0.121224	0.984224	0.0752736	0.996879	-0.0277883	0.961112	-0.0737383	0.9158	23.0299	29.9539	25.1552	37.8454	33.1344	12.8146	27.7516	30.177	25.0438	30.542	31.6737	23.7709	ENSMUSG00000083355	downstream	11611	NA
chr1	60920608	60920742	135	-0.578012	0.931075	-0.302042	0.993049	0.828957	0.290388	1.10493	0.211192	43.0034	27.6304	39.9289	37.4655	8.18134	28.7141	24.7324	19.3394	14.8794	18.3817	5.50784	19.3689	ENSMUSG00000102549	inside	155	NA
chr1	60960539	60961300	762	-0.165774	0.967544	0.305252	0.974375	0.414088	0.185951	0.885114	0.00847483	25.2802	27.7392	24.2875	27.5715	18.6013	21.2735	24.4124	11.7472	16.005	17.0346	17.2856	17.5864	ENSMUSG00000081382	downstream	19958	Rpl18-ps1
chr1	60998283	60999004	722	-0.0406864	0.995667	-0.327756	0.982585	0.483198	0.328458	0.196129	0.789945	13.8886	12.0548	9.70571	16.1661	9.68843	8.29751	11.2309	13.6895	7.15414	7.00625	7.94463	10.4121	ENSMUSG00000080800	upstream	10659	NA
chr1	61038216	61038576	361	-0.184097	0.96896	-0.616486	0.782861	0.585274	0.0886384	0.152885	0.780663	37.28	40.4697	36.3342	28.0213	31.6149	34.1662	40.9596	33.0614	35.3732	26.9674	19.7144	19.0134	ENSMUSG00000102561	downstream	7094	NA
chr1	61042817	61043032	216	-0.00775992	0.999513	-0.00384586	0.999855	-0.294717	0.572632	-0.290803	0.658979	32.9855	41.7334	26.6193	24.3166	33.2367	39.1556	39.7484	31.9446	50.4838	30.0471	47.7018	48.4222	ENSMUSG00000102561	downstream	11695	NA
chr1	61141952	61142155	204	-0.285868	0.969197	-0.246878	0.990735	-0.316711	0.626743	-0.277721	0.731673	20.6968	23.6179	18.4965	20.0254	18.9494	20.7294	9.35257	25.5963	25.32	22.4573	20.828	20.8287	ENSMUSG00000082661	downstream	18382	NA
chr1	61156917	61158063	1147	0.254858	0.926791	0.188647	0.985167	0.0723631	0.861169	0.00615195	0.991427	20.2457	14.0922	16.2918	24.7618	14.9254	19.3559	20.7926	15.6083	17.6379	19.3051	20.0962	17.0976	ENSMUSG00000082661	downstream	2474	NA
chr1	61181228	61181396	169	0.0105868	0.999513	-0.127921	0.996879	0.225851	0.798078	0.0873434	0.943169	26.5446	35.8664	20.2007	39.1367	8.71385	35.4485	29.6349	32.0008	20.3759	23.7197	34.5695	9.67012	ENSMUSG00000082661	upstream	18065	NA
chr1	61298144	61298631	488	0.0423942	0.995667	0.0850507	0.996879	-0.236844	0.657148	-0.194187	0.782902	21.0891	32.167	16.2007	25.9111	32.0631	10.1098	25.9016	21.018	32.0478	31.6842	24.379	28.8003	ENSMUSG00000100893	downstream	5819	NA
chr1	61376645	61377301	657	0.353982	0.887848	-0.258722	0.978771	0.187956	0.639909	-0.424749	0.318062	13.2545	19.1615	21.8788	27.2405	23.8155	19.3096	22.506	22.4239	26.6432	22.953	20.3715	17.4121	ENSMUSG00000085248	downstream	29740	NA
chr1	61439970	61440131	162	-0.16597	NA	-0.452631	0.986975	-0.951825	0.263352	-1.23849	0.19295	9.77349	11.5127	7.76395	7.20491	15.9082	2.17531	7.36082	21.872	23.9134	10.6048	24.9164	14.1231	ENSMUSG00000085447	downstream	4907	9530026F06Rik
chr1	61461280	61462001	722	-0.258703	0.926791	0.00697001	0.999855	-0.691845	0.00995659	-0.426172	0.244631	28.8738	37.0255	30.8592	35.2961	30.595	18.5474	22.1314	47.2675	39.9439	41.3765	48.9919	40.2904	ENSMUSG00000086408	upstream	17259	NA
chr1	61608223	61608692	470	0.532898	0.890101	0.413882	0.977577	-0.592165	0.237679	-0.711181	0.258993	10.1062	14.2194	7.64596	18.6255	19.9746	14.246	8.62626	19.0455	16.1797	15.4334	32.9968	21.5582	ENSMUSG00000100381	downstream	20553	NA
chr1	61638633	61640053	1421	-0.166504	0.966557	0.127171	0.9911	0.0043146	0.992325	0.297989	0.448538	24.5128	20.9999	21.4958	27.2428	15.8042	19.5916	16.6155	18.3731	17.8719	23.3068	16.9687	18.8611	ENSMUSG00000086009	downstream	16049	NA
chr1	61659706	61660012	307	-0.6707	0.761146	0.442148	0.978771	1.25642	0.00408551	2.36927	3.97887e-06	34.3823	31.8942	50.9191	24.079	19.1875	29.845	26.4126	6.0745	8.87988	9.01585	8.30405	15.9699	ENSMUSG00000086009	inside	296	NA
chr1	61741535	61741995	461	-0.782107	0.822094	0.511639	0.974375	-0.84665	0.150216	0.447096	0.591938	12.0208	9.10275	8.57475	6.75167	5.19098	3.0577	7.24267	6.87697	7.46969	10.5588	12.673	6.38102	ENSMUSG00000104081	overlapStart	151	NA
chr1	61903605	61904514	910	-0.0717777	0.990604	0.261314	0.978771	-0.944971	0.00100437	-0.611879	0.111378	9.85941	17.7624	12.8343	12.3988	11.9349	12.3921	15.4626	18.2389	23.4929	25.6964	27.3144	21.5505	ENSMUSG00000085842	upstream	12906	NA
chr1	62157065	62157174	110	-0.675336	NA	3.52071	0.716956	0.879825	0.393299	5.07587	0.00863427	23.9895	26.8454	24.5018	14.1478	11.7142	28.8327	10.8405	1.69534	0	7.80902	3.86264	17.8282	ENSMUSG00000085019	downstream	13180	Pard3bos2
chr1	62175023	62175622	600	-0.0688216	0.992866	1.23172	0.395202	0.607055	0.175724	1.9076	0.000110596	28.1476	20.2047	18.5669	29.5041	20.2488	14.6833	19.0793	5.2838	6.45661	9.54436	11.5074	22.8795	ENSMUSG00000085019	overlapStart	245	Pard3bos2
chr1	62333095	62333311	217	-0.396448	0.95616	-0.298053	0.989596	-0.447073	0.520986	-0.348678	0.692259	31.6175	17.9056	10.7642	16.1363	13.5727	6.49586	21.9807	24.0629	25.7868	18.0331	22.0277	21.0871	ENSMUSG00000102359	downstream	44266	NA
chr1	62413130	62413305	176	-0.818494	0.824525	0.274065	0.990735	-0.937535	0.125759	0.155024	0.88333	38.9829	21.1938	16.3345	16.5795	9.41319	18.0205	13.5506	20.1321	24.4569	19.5226	25.9521	38.9991	ENSMUSG00000085400	downstream	82579	NA
chr1	62522712	62523188	477	0.0222205	0.995737	-0.368734	0.948258	-0.479749	0.137213	-0.870704	0.0115615	24.3415	42.0321	22.6013	30.5869	27.7857	35.4617	28.9989	50.0427	59.5578	39.6181	43.8697	44.5393	ENSMUSG00000085400	inside	15232	NA
chr1	62551541	62551950	410	-0.737617	0.797765	-0.927003	0.792903	0.377172	0.553672	0.187786	0.831203	47.6279	30.326	26.2946	14.2341	17.5101	25.7854	26.1758	34.1135	26.5963	9.54436	8.8087	33.4822	ENSMUSG00000085400	upstream	13121	NA
chr1	62569093	62569202	110	-0.480133	NA	-0.722355	0.98867	2.85642	0.006859	2.6142	0.0300557	21.5905	11.3033	47.3702	31.8326	15.0611	16.0182	13.0086	3.39068	5.21746	1.73534	4.8283	0	ENSMUSG00000100750	downstream	4448	NA
chr1	62591731	62591965	235	-0.332643	NA	-0.535893	0.978771	0.446857	0.583483	0.243607	0.823323	11.2291	16.5341	16.8211	10.7614	13.3164	14.9958	9.13368	11.9034	13.4322	8.93515	4.52011	15.2994	ENSMUSG00000100750	upstream	16630	NA
chr1	62665033	62665646	614	0.704106	0.822094	0.609861	0.960875	0.815117	0.12358	0.720872	0.33293	12.8934	6.83447	6.73068	20.277	7.79492	17.7922	10.8758	6.37823	4.20626	5.90693	8.99605	9.58192	ENSMUSG00000081950	downstream	30208	NA
chr1	62702907	62703702	796	-0.0020111	0.999609	0.114557	0.989573	-0.421151	0.0433895	-0.304583	0.279603	37.4609	44.5176	40.8569	44.4786	40.4699	40.7297	38.3503	45.2161	56.0582	52.7578	57.515	54.6119	ENSMUSG00000084333	downstream	2032	Gm11599
chr1	62706362	62706846	485	-0.156603	0.970882	0.034741	0.996879	-0.263986	0.46975	-0.072642	0.900018	26.1164	37.8138	39.6407	42.5164	28.466	24.7043	28.0288	35.3749	37.8669	38.3742	38.1087	35.7176	ENSMUSG00000084333	downstream	5487	Gm11599
chr1	62724944	62725601	658	0.112232	0.979462	0.163771	0.989566	-0.547054	0.0462939	-0.495515	0.160283	32.8853	40.3906	33.5876	42.2768	40.285	24.6359	45.6684	39.1113	61.2735	53.6689	56.1785	60.1046	ENSMUSG00000025969	upstream	16843	Nrp2
chr1	62736432	62736744	313	-0.138789	0.980648	0.0719852	0.996879	0.193378	0.685772	0.404153	0.434496	35.4094	39.7242	32.1472	37.2906	34.6988	19.1399	36.5736	31.5777	22.9202	26.2241	30.2039	29.239	ENSMUSG00000025969	upstream	5700	Nrp2
chr1	62742125	62742509	385	0.305682	0.942106	0.068636	0.996879	0.527211	0.218445	0.290165	0.646919	24.6749	35.5248	23.3351	43.9593	40.6411	20.1372	31.5923	20.3441	25.342	27.0217	28.1421	14.4323	ENSMUSG00000025969	overlapStart	65	Nrp2
chr1	62747813	62748114	302	-0.583311	0.821711	-0.534225	0.934785	-0.438785	0.355153	-0.389699	0.499258	31.4564	42.715	25.5836	21.2569	33.5245	14.0027	18.1632	41.373	46.0847	29.7076	35.5248	23.8103	ENSMUSG00000025969	inside	5369	Nrp2
chr1	62860834	62861063	230	-0.797855	0.866278	-0.468725	0.974375	-2.10631	0.000128946	-1.77718	0.00266614	11.4732	12.8391	7.03096	9.30373	6.40279	1.53217	5.18458	34.0542	37.4296	25.7283	27.2484	24.1585	ENSMUSG00000100426	inside	320	NA
chr1	62884965	62885326	362	-0.404357	0.945802	-0.221186	0.990735	-1.55415	0.000844491	-1.37098	0.0118559	11.6634	11.5922	8.93437	5.91121	13.2212	4.86741	7.24695	30.9095	24.574	20.8289	31.1039	18.058	ENSMUSG00000100426	upstream	13436	NA
chr1	62951530	62951836	307	-0.107942	0.990387	-0.210654	0.993214	0.620239	0.252735	0.517526	0.461695	26.6463	17.2127	17.5583	15.2078	22.1855	20.6619	17.0905	12.149	15.8903	15.8555	12.1101	6.38795	ENSMUSG00000100426	upstream	80001	NA
chr1	62964375	62964533	159	-0.158036	0.986895	-0.462101	0.97668	0.0474067	0.954818	-0.256658	0.763208	21.5754	37.1446	30.5117	30.5869	39.363	15.5145	19.4992	29.3219	42.4124	25.2115	24.0504	30.8349	ENSMUSG00000100426	upstream	92846	NA
chr1	63113409	63114813	1405	0.183968	0.931075	0.0773205	0.995158	0.077862	0.792142	-0.0287856	0.945438	37.0001	33.8497	35.0408	44.1679	32.2304	43.1408	41.0781	41.2794	30.8406	36.683	39.0113	38.1519	ENSMUSG00000081429	downstream	231	NA
chr1	63176287	63177480	1194	0.190257	0.931075	0.196572	0.978743	0.101259	0.732214	0.107575	0.77505	25.637	31.7611	32.3544	36.8211	27.5966	36.5977	36.7523	28.5822	27.2781	30.4556	32.6497	33.123	ENSMUSG00000101599	downstream	10291	NA
chr1	63181104	63181343	240	-0.180733	0.95513	-0.196105	0.979617	-0.0307989	0.939609	-0.0461718	0.925948	79.1653	79.6532	86.0967	79.4341	65.962	74.8851	68.5661	87.0274	81.9033	71.9804	71.7003	78.9887	ENSMUSG00000101599	downstream	15108	NA
chr1	63445834	63446244	411	-0.0275892	0.998874	-0.0871976	0.996879	0.145642	0.885772	0.086034	0.949612	14.1252	5.6723	19.673	11.8329	8.0619	21.4355	11.0251	14.9734	9.77481	12.0756	3.10139	21.4719	ENSMUSG00000025964	upstream	38806	Adam23
chr1	63630050	63630800	751	-0.23378	0.98981	0.335286	0.995158	-0.494373	0.67477	0.0746925	0.967895	23.5423	10.1406	9.57017	12.9516	7.59851	17.3619	11.1147	16.389	10.89	6.7357	6.22343	39.605	ENSMUSG00000087823	upstream	15301	Gm22281
chr1	63668908	63669073	166	-0.157776	0.990387	0.393149	0.989596	0.219525	0.830002	0.77045	0.456606	34.9726	24.343	24.8954	2.34377	26.614	21.2289	50.2842	13.481	19.0154	18.9737	26.8756	17.7208	ENSMUSG00000115378	downstream	8930	Gm39653
chr1	63730307	63730799	493	0.453239	0.857177	0.0711753	0.996879	0.368128	0.366413	-0.0139358	0.985011	26.7631	18.2848	28.7925	35.9076	37.7122	37.17	23.2202	28.3703	21.2455	26.7165	32.3193	16.5745	ENSMUSG00000069085	upstream	4221	Dytn
chr1	63786095	63786362	268	0.375671	0.970331	-0.755503	0.945872	-0.723716	0.322655	-1.85489	0.0108764	3.93857	8.11901	10.0567	4.35521	16.4848	9.20448	8.8989	34.0965	20.8796	17.8066	21.4031	7.31754	ENSMUSG00000025962	inside	7452	Fastkd2
chr1	63876493	63876962	470	-0.180406	0.979069	-0.92289	0.532944	-0.673419	0.126782	-1.4159	0.00130601	11.7906	18.8489	9.17515	9.93358	14.4914	13.4962	9.64111	43.2492	28.696	19.901	16.9504	20.1673	ENSMUSG00000080817	downstream	7024	Gm13751
chr1	63902443	63903628	1186	0.210304	0.962039	-0.169703	0.989573	-0.461474	0.162696	-0.841481	0.0193738	19.8024	18.2154	13.3321	19.0268	26.5411	13.371	19.1034	28.146	32.9061	32.351	29.9143	17.9134	ENSMUSG00000080817	upstream	17706	Gm13751
chr1	63932588	63932840	253	0.0812216	0.993015	-0.108948	0.996879	0.24415	0.729455	0.0539798	0.959121	28.1616	17.8151	14.204	10.7646	20.3725	20.8933	32.0501	16.2163	21.5504	15.4671	17.6338	20.6704	ENSMUSG00000082373	upstream	24167	Gm13754
chr1	63964413	63964848	436	-0.289243	0.955345	0.502999	0.964392	0.601569	0.192516	1.39381	0.00504926	33.8934	18.18	27.6114	12.9391	27.0209	25.8642	20.7859	9.4099	10.5307	11.821	13.3996	18.7414	ENSMUSG00000082373	inside	7406	Gm13754
chr1	63976899	63977277	379	-0.474066	0.830362	0.778834	0.801389	1.44959	2.23795e-05	2.70249	1.43644e-10	64.7526	44.6989	68.743	43.6287	33.999	60.438	34.6095	10.8251	7.57151	19.8946	12.8925	12.936	ENSMUSG00000082373	downstream	1808	Gm13754
chr1	63998758	63999873	1116	0.210176	0.936078	0.0922261	0.995147	-0.416346	0.0965253	-0.534296	0.0716125	24.3549	22.7004	17.0664	20.2202	28.2058	28.7351	21.7975	30.2457	31.3702	34.0381	32.6473	31.6306	ENSMUSG00000044689	upstream	4013	Gm13749
chr1	64088029	64088529	501	-0.0450225	0.995667	-0.30231	0.983547	0.636061	0.160675	0.378773	0.547717	13.1679	16.1315	11.8352	13.9784	13.5947	10.5509	14.7569	11.5391	9.73718	8.76329	8.48085	8.48114	ENSMUSG00000098487	upstream	6369	Mir6899
chr1	64121221	64122446	1226	0.199192	0.90908	-0.0230226	0.996879	0.207677	0.362387	-0.0145375	0.971686	76.1949	88.8663	111.531	108.056	99.5474	108.939	107.963	95.5253	91.1673	98.4798	102.15	73.048	ENSMUSG00000086836	inside	3408	NA
chr1	64200542	64200908	367	-0.131992	0.990105	-0.507377	0.974375	-0.899207	0.110268	-1.27459	0.0396278	8.62837	15.6691	6.85428	12.1914	13.0411	8.64197	3.89903	32.5209	18.7658	15.0837	20.2604	18.7026	ENSMUSG00000086721	downstream	10718	NA
chr1	64224371	64224477	107	-0.699646	NA	-0.38215	0.987259	-0.0246638	0.981935	0.292832	0.776805	32.0607	46.481	25.1888	14.5445	20.6445	36.2281	17.8311	33.1146	24.1369	24.9759	18.862	21.3827	ENSMUSG00000086721	downstream	34547	NA
chr1	64225958	64226501	544	-0.0630655	0.991241	-0.179037	0.989573	-0.0748879	0.873616	-0.190859	0.707516	36.3811	33.9983	52.8471	30.0381	49.4039	34.9809	42.525	46.9646	46.9476	47.02	47.644	27.0372	ENSMUSG00000086721	downstream	36134	NA
chr1	64289043	64289610	568	-0.0672416	0.993015	0.421094	0.978771	1.38322	0.00138993	1.87155	0.000457941	21.3709	17.2386	15.8169	13.0145	15.232	21.7148	19.7343	3.93987	5.80994	6.38531	3.74023	11.5088	ENSMUSG00000101895	inside	52592	NA
chr1	64295225	64295947	723	-0.110044	0.989143	-0.13318	0.995219	0.105746	0.860945	0.0826103	0.916859	22.6291	15.6926	13.6686	12.646	8.6566	24.3707	19.4619	15.7341	16.6699	15.4452	11.9005	17.6309	ENSMUSG00000101895	inside	46255	NA
chr1	64305309	64305944	636	-0.165701	0.966557	-0.138153	0.990735	-0.042252	0.921054	-0.0147039	0.978989	49.7895	49.852	34.1844	35.7867	31.5483	54.3007	39.3735	43.3964	46.4731	41.7191	41.4201	39.0575	ENSMUSG00000101895	inside	36258	NA
chr1	64341660	64341832	173	0.275116	NA	-0.219282	0.996879	2.97845	0.000137697	2.48406	0.0123139	19.8294	18.8661	30.1198	30.3606	18.0888	52.9619	12.407	2.15592	5.80556	1.10339	3.07002	9.44653	ENSMUSG00000101895	inside	370	NA
chr1	64446062	64446352	291	-0.0891197	0.990387	-0.199418	0.990735	-0.0388103	0.949757	-0.149109	0.825366	31.7386	28.841	24.0808	18.0494	34.1592	24.2199	28.6844	33.3242	29.0905	27.5507	24.4568	30.3263	ENSMUSG00000099658	downstream	47166	Gm28980
chr1	64481589	64482146	558	0.1683	0.979462	0.124958	0.995219	-0.360011	0.461045	-0.403353	0.508614	17.9706	11.1413	8.69419	10.4587	16.8245	12.6308	15.3865	15.3735	17.2279	17.4467	21.8918	12.8866	ENSMUSG00000099658	downstream	11372	Gm28980
chr1	64532333	64533495	1163	0.117938	0.967544	-0.0432395	0.996879	0.148036	0.560027	-0.0131412	0.975474	77.8266	76.5746	105.212	86.3103	91.8026	83.3277	114.221	90.1168	84.7557	88.55	90.6043	74.1947	ENSMUSG00000025958	upstream	38309	Creb1
chr1	64614983	64616513	1531	-0.0410943	0.991026	-0.210584	0.962914	-0.261013	0.210527	-0.430503	0.0595965	32.9209	33.7033	26.5236	29.3514	29.2172	31.0738	31.1549	38.9784	44.5154	36.8434	34.4131	37.3604	ENSMUSG00000025956	downstream	29119	Mettl21a
chr1	64616721	64617843	1123	0.157246	0.940885	0.0889787	0.992602	0.0073078	0.982597	-0.0609595	0.871443	53.1058	50.7921	37.6	50.9284	55.8961	54.9154	48.2078	50.8149	47.4009	55.2434	48.7129	52.6802	ENSMUSG00000025956	downstream	27789	Mettl21a
chr1	64623994	64624148	155	-1.25311	0.695436	0.122285	0.996879	0.833242	0.322344	2.20863	0.00775957	49.3719	34.0923	55.6428	16.3156	7.12568	18.1884	36.9276	10.8283	9.25679	3.69459	10.2796	23.1958	ENSMUSG00000025956	downstream	21484	Mettl21a
chr1	64649333	64650059	727	0.0328884	0.995667	0.442895	0.895112	1.20535	2.07623e-06	1.61536	1.17967e-07	71.8694	49.1703	61.0467	52.9814	48.109	77.0724	70.8583	20.7778	18.7491	28.4887	20.1633	33.2695	ENSMUSG00000025956	inside	3701	Mettl21a
chr1	64684811	64685170	360	-0.432741	0.974321	-0.60052	0.986961	-0.735604	0.512638	-0.903382	0.501079	19.0583	18.5642	11.4796	10.267	24.544	0	12.587	33.6713	27.5004	14.8468	25.6705	19.9742	ENSMUSG00000100437	upstream	3924	NA
chr1	64690495	64691625	1131	0.156332	0.953514	0.245721	0.965686	0.17989	0.49982	0.269279	0.387824	66.2627	73.2444	98.6572	73.7882	91.1449	82.881	106.699	70.5716	61.5278	73.165	88.7536	72.248	ENSMUSG00000100437	inside	290	NA
chr1	64705389	64705498	110	-0.780278	NA	-0.159679	0.996739	0.121921	0.900149	0.74252	0.379499	38.3832	35.3229	40.8364	26.5272	21.7549	25.6291	15.1767	22.0394	23.4786	19.9564	28.0041	8.91409	ENSMUSG00000100437	downstream	13474	NA
chr1	64715485	64715710	226	-0.133163	0.985118	-0.37579	0.978771	0.868366	0.0383427	0.62574	0.252517	42.0347	40.5745	40.5473	43.899	43.1692	31.1859	29.5475	35.4821	18.4112	17.7373	22.5606	21.6936	ENSMUSG00000070871	upstream	13904	Ccnyl1
chr1	64716678	64717718	1041	0.0837568	0.985889	-0.27526	0.973622	0.0057419	0.989536	-0.353275	0.337446	23.5747	26.8739	22.7836	21.8639	26.7013	19.2957	35.281	34.9328	27.7037	24.8465	27.8566	24.4902	ENSMUSG00000070871	upstream	11896	Ccnyl1
chr1	64737131	64738440	1310	0.0747707	0.982364	0.178971	0.978771	0.000799537	0.998394	0.105	0.76124	67.8847	68.5751	78.0442	58.5083	81.5011	71.8251	89.5705	70.0395	63.0875	81.5278	77.9236	65.37	ENSMUSG00000087213	upstream	7313	2810408I11Rik
chr1	64753196	64753462	267	-1.27016	0.4697	-2.0163	0.0347202	0.750673	0.259812	0.00453644	0.996229	29.6499	23.284	25.5724	9.47162	11.031	14.5184	8.93223	27.2397	24.7194	3.93213	5.17189	13.4657	ENSMUSG00000102140	upstream	21937	NA
chr1	64791636	64792097	462	-0.0608647	0.995667	-0.344787	0.984284	-0.170789	0.820466	-0.454711	0.556383	15.993	13.7928	5.44485	13.4741	9.16416	6.86494	14.454	15.3388	16.4599	10.1228	17.4738	9.19708	ENSMUSG00000045005	upstream	14726	Fzd5
chr1	64860179	64860890	712	-0.39607	0.902466	-0.391956	0.971721	-0.21569	0.665024	-0.211576	0.726362	11.86	13.7521	17.9175	7.10372	10.3416	14.8483	13.0634	18.5963	15.3153	12.7348	12.0843	14.2308	ENSMUSG00000045005	upstream	83269	Fzd5
chr1	64887640	64888104	465	-0.542053	0.893263	-0.354735	0.980624	-1.02634	0.0326708	-0.839021	0.15866	17.5923	21.7255	7.72817	12.5505	13.0637	6.82065	9.74478	35.6933	20.6735	21.757	28.5545	14.0581	ENSMUSG00000097264	upstream	85457	Rpl31-ps24
chr1	64930174	64930507	334	-0.118044	0.990604	-0.332034	0.983547	-0.707582	0.188013	-0.921572	0.127974	14.2213	13.96	6.99353	6.40676	12.125	13.7162	11.4247	24.0088	20.1903	19.1459	17.1737	15.6575	ENSMUSG00000097264	upstream	43054	Rpl31-ps24
chr1	64956326	64957089	764	-0.172201	0.961436	-0.280891	0.963032	-0.0507362	0.897324	-0.159427	0.696872	31.4312	31.7352	27.7516	20.8792	25.5399	32.7492	29.6552	33.4408	34.1798	26.7342	27.1118	30.3748	ENSMUSG00000097264	upstream	16472	Rpl31-ps24
chr1	64993335	64993497	163	-0.3602	0.964252	-0.765604	0.846793	-1.35068	0.00803826	-1.75609	0.00124528	24.2838	20.0236	11.0233	13.128	16.9399	10.8098	14.6313	57.2047	65.1383	43.9158	35.1903	26.0678	ENSMUSG00000051344	inside	2486	Plekhm3
chr1	65010197	65010456	260	-0.660645	0.662865	0.0401419	0.996879	-0.0285118	0.960291	0.672275	0.114578	58.8665	50.8107	51.1397	35.9137	26.196	29.8185	43.1118	38.732	28.696	35.2407	32.2753	36.4563	ENSMUSG00000051344	upstream	14214	Plekhm3
chr1	65032585	65033067	483	-0.317918	0.931075	-0.437916	0.94071	-0.904569	0.00772015	-1.02457	0.00992398	26.7709	49.8763	30.5047	28.5959	41.1608	21.1586	23.2072	61.7763	84.6622	61.4554	62.0182	36.5422	ENSMUSG00000084416	downstream	43	Rpl10a-ps1
chr1	65090457	65090692	236	0.38681	0.964252	0.146929	0.99616	-1.28939	0.0155961	-1.52927	0.0182129	15.6541	8.56132	8.37492	19.783	21.06	4.47966	7.07387	29.2374	31.6143	32.7582	28.356	41.5487	ENSMUSG00000070870	upstream	149	Cryge
chr1	65112161	65112955	795	-0.0575683	0.991241	-0.127656	0.992342	0.0971169	0.815778	0.0270294	0.962751	26.2225	20.3318	30.9637	27.4059	23.6178	23.4933	24.299	29.3219	21.4769	23.0505	26.7227	18.5009	ENSMUSG00000025952	overlapStart	107	Crygc
chr1	65177540	65179459	1920	0.0366424	0.990925	-0.0287698	0.996879	0.0641499	0.788118	-0.0012623	0.996791	59.2365	62.816	68.9709	63.0205	65.962	68.8282	63.9701	65.4648	62.1748	66.0649	68.4361	51.7512	ENSMUSG00000044816	upstream	15167	D630023F18Rik
chr1	65186306	65187118	813	0.133953	0.969622	-0.00551591	0.999855	0.170112	0.579763	0.0306426	0.951199	68.162	66.3359	105.863	66.0406	84.2285	97.9612	105.018	79.8248	77.2993	77.1297	83.8806	73.1694	ENSMUSG00000044816	upstream	23933	D630023F18Rik
chr1	65282926	65283032	107	0.0412509	NA	-0.281184	0.995219	0.347592	0.765295	0.0251577	0.987943	7.39862	11.6203	43.6606	25.4529	24.0852	29.6411	8.91554	33.1146	9.38656	19.6239	13.8983	18.328	ENSMUSG00000025946	upstream	38183	Pth2r
chr1	65573989	65574154	166	-0.940063	0.736864	-0.437777	0.978771	-0.558379	0.392092	-0.0560937	0.957505	36.5623	35.5783	18.401	16.4064	18.8516	16.9831	10.0568	30.3323	31.9805	27.0232	19.8368	21.6587	ENSMUSG00000099819	upstream	10755	NA
chr1	66174846	66175633	788	0.17106	0.969033	-0.00156113	0.999884	0.00498652	0.991871	-0.167634	0.740287	33.153	31.3603	53.5848	29.8711	37.3767	60.3731	51.7537	44.7285	43.8816	43.2403	41.9229	48.115	ENSMUSG00000015222	upstream	38799	Map2
chr1	66700642	66701538	897	0.10092	0.97301	-0.253175	0.94071	-0.0709272	0.805583	-0.425022	0.0815507	70.6045	65.6684	79.9246	63.9767	75.7253	84.8589	85.612	109.356	84.4566	84.3777	82.5386	75.7913	ENSMUSG00000103375	downstream	28251	NA
chr1	66815863	66818022	2160	0.160837	0.931075	0.0825894	0.993046	0.150604	0.502902	0.0723558	0.82756	54.9759	53.6058	71.7056	62.5927	67.6665	71.4589	67.4619	62.4214	52.078	60.9779	66.8809	53.1131	ENSMUSG00000102776	inside	1193	NA
chr1	66845896	66846211	316	-0.352251	0.961436	1.4015	0.671106	0.894439	0.121541	2.64819	8.81622e-05	45.0941	12.296	28.999	17.2371	18.641	22.3038	30.9434	7.08179	2.27026	12.0815	11.429	12.412	ENSMUSG00000103382	upstream	5263	NA
chr1	66861962	66862094	133	0.245272	0.977538	-0.428498	0.978918	-0.104616	0.90268	-0.778386	0.294938	19.8409	36.2259	18.9137	17.5518	40.1378	15.8978	44.8291	40.6626	46.3883	33.0106	30.3493	34.4053	ENSMUSG00000103553	inside	1577	NA
chr1	66862647	66863554	908	0.0124638	0.997732	-0.0707858	0.99616	0.0713807	0.834801	-0.0118689	0.980316	59.2868	54.6027	79.9457	56.7744	60.0085	72.1877	72.7554	65.1062	65.2614	69.2702	68.3194	46.4357	ENSMUSG00000103553	inside	1519	NA
chr1	66871516	66872410	895	-0.128396	0.984078	0.116178	0.995219	-0.932259	0.00492132	-0.687685	0.109384	9.72981	11.6349	8.43191	12.1719	9.87245	5.51241	7.9941	16.2525	15.871	16.2094	16.2598	20.4509	ENSMUSG00000103553	upstream	6443	NA
chr1	66895815	66896661	847	-0.194425	0.966628	-0.270839	0.978743	-0.487754	0.142161	-0.564168	0.146284	19.0046	15.4136	13.7889	13.5507	14.7786	15.8102	11.826	27.5217	19.8196	22.5369	15.8017	20.4522	ENSMUSG00000089420	overlapEnd	15	Gm27934
chr1	67038341	67039214	874	-0.232899	0.931763	-0.0217188	0.997339	-0.34294	0.249515	-0.13176	0.77555	70.349	55.1264	66.8146	30.9383	53.497	67.3351	67.3995	72.7599	67.4718	71.7465	64.1711	71.4283	ENSMUSG00000026000	downstream	462	Lancl1
chr1	67049668	67049976	309	-0.0636274	0.994174	-0.317905	0.985167	0.419899	0.460818	0.165621	0.845479	27.3278	15.5924	26.7485	19.5162	20.2548	36.4945	13.8927	23.5372	17.6448	17.6061	12.7192	20.0976	ENSMUSG00000026000	inside	9992	Lancl1
chr1	67061397	67061797	401	0.120277	0.989375	-0.0260132	0.99854	0.170017	0.786163	0.0237269	0.979342	15.7936	14.3406	21.5078	11.1577	16.0668	25.4853	23.7896	20.9275	13.2388	16.899	14.3043	19.5621	ENSMUSG00000026000	inside	16234	Lancl1
chr1	67307334	67307484	151	0.568754	NA	0.11564	0.996879	1.9212	0.00881453	1.46808	0.147077	26.2137	5.14639	33.3181	16.7478	26.8196	46.6755	37.9058	9.88012	5.7012	10.1132	4.92423	10.8228	ENSMUSG00000077745	downstream	10823	Gm26342
chr1	67955822	67956658	837	-0.312426	0.940885	-0.449166	0.949121	-0.755876	0.0469357	-0.892617	0.0400499	16.3942	11.6984	9.0162	6.04283	11.2164	7.99953	13.9618	23.6173	21.7706	13.6837	17.8941	18.7441	ENSMUSG00000104395	downstream	11131	NA
chr1	69241590	69242239	650	-0.172532	0.97432	-0.23447	0.986975	0.425205	0.310213	0.363267	0.501514	28.4183	18.6505	22.1145	15.5626	19.824	17.8911	27.8851	20.9439	14.7895	10.7191	16.6688	19.1081	ENSMUSG00000084332	upstream	71132	NA
chr1	69687017	69687986	970	0.179889	0.964131	-0.109003	0.994763	0.0763907	0.853391	-0.212501	0.630624	55.7693	48.0683	70.2049	41.1126	65.6616	81.7423	75.4811	76.9019	57.6879	74.9774	59.6818	51.2177	ENSMUSG00000099954	downstream	11360	NA
chr1	69689101	69689287	187	-0.561618	0.822094	-0.322263	0.978771	-0.494271	0.261025	-0.254915	0.679025	71.9684	65.6591	64.3773	21.8459	54.1412	33.9209	71.4197	87.7587	72.891	67.8824	58.5076	66.4187	ENSMUSG00000099954	downstream	10059	NA
chr1	69759566	69759946	381	-0.290914	0.967519	-0.800281	0.866133	0.4975	0.411635	-0.0118666	0.990668	22.8561	15.9092	16.0344	13.2752	14.4945	20.3486	11.8932	23.9839	12.804	5.51118	13.94	12.8681	ENSMUSG00000025997	upstream	33162	Ikzf2
chr1	70135552	70135818	267	-0.393362	0.940885	-0.00791089	0.999855	2.2579	4.64553e-06	2.64335	7.13322e-06	75.1131	41.3292	86.1387	24.7719	37.2297	105.588	41.9815	12.5722	9.13544	8.93667	9.15026	15.914	ENSMUSG00000101730	upstream	28338	NA
chr1	70855992	70856264	273	-0.888847	0.732474	-0.131172	0.99616	-1.74198	0.000123117	-0.984305	0.0869914	32.8647	35.2971	8.55619	9.97603	16.8572	14.1993	13.9775	56.6976	44.1478	41.9532	56.4186	38.3121	ENSMUSG00000045648	inside	68292	Vwc2l
chr1	71102247	71103385	1139	0.041898	0.991844	-0.272214	0.956385	0.0753801	0.817952	-0.238732	0.469557	88.9653	71.3654	94.967	64.9011	102.464	88.7962	94.0143	110.19	90.5727	91.589	88.9696	67.1491	ENSMUSG00000089965	upstream	23058	NA
chr1	71364589	71365004	416	-0.309578	0.945554	-0.628298	0.865373	-0.109232	0.857843	-0.427951	0.45046	19.6644	23.9109	22.46	11.223	26.9925	15.2481	17.1988	29.1386	30.3516	17.6662	16.0866	25.928	ENSMUSG00000050296	inside	83154	Abca12
chr1	71540340	71541076	737	0.254022	0.94405	0.456169	0.939995	0.552623	0.112845	0.754771	0.0757011	20.767	16.8707	15.1156	24.8115	19.482	24.3859	14.8854	10.3745	10.3181	13.9863	16.5748	11.0872	ENSMUSG00000101617	upstream	7367	NA
chr1	71556801	71557611	811	-0.027211	0.993778	-0.178167	0.974375	-0.133666	0.565059	-0.284622	0.245093	99.892	91.0295	91.5017	82.9942	97.1471	83.8634	104.395	116.353	112.697	108.507	107.925	84.6344	ENSMUSG00000101617	upstream	23828	NA
chr1	71630965	71631308	344	0.311556	0.962039	-0.0240718	0.998626	-0.253244	0.669338	-0.588872	0.351392	15.3421	17.6204	13.0581	27.7096	12.3077	13.3175	22.1852	28.1899	18.3521	17.757	25.6293	25.6539	ENSMUSG00000026192	downstream	12175	Atic
chr1	71652671	71653720	1050	0.0492388	0.990604	-0.104179	0.990887	-0.0516928	0.876812	-0.205111	0.53814	51.2689	59.9481	59.0377	66.3264	67.1454	51.3497	49.5152	65.5369	65.5909	60.6294	72.9395	47.6267	ENSMUSG00000073652	upstream	38276	Apol7d
chr1	71683541	71684379	839	0.298757	0.898705	0.650436	0.593919	-0.0493552	0.907709	0.302324	0.469108	25.7908	28.3426	17.5611	27.1279	34.8853	28.1416	27.0043	16.6705	21.8897	27.0746	30.3855	34.6718	ENSMUSG00000073652	upstream	7617	Apol7d
chr1	71691943	71692149	207	-0.270236	0.970466	0.0759048	0.996879	0.883055	0.123106	1.2292	0.0648336	24.2213	24.7773	24.3045	21.6147	20.4533	13.6193	24.1947	8.10814	12.4765	9.68269	12.3157	11.0529	ENSMUSG00000073652	overlapStart	53	Apol7d
chr1	71767080	71767869	790	-0.360619	0.829511	-0.462827	0.828936	0.535434	0.0514039	0.433226	0.206771	30.7308	33.0515	28.6578	25.3631	26.5635	18.2891	24.7547	24.5502	21.2496	15.9475	15.5972	19.0318	ENSMUSG00000100319	upstream	12997	NA
chr1	71800871	71801637	767	0.187889	0.97077	0.339995	0.976312	0.301879	0.487011	0.453985	0.379776	14.45	10.9423	22.7235	19.2757	15.6	15.6214	22.3876	10.2118	13.0947	16.3013	14.8185	12.7842	ENSMUSG00000100319	upstream	46788	NA
chr1	71807233	71807957	725	0.300883	0.869553	-0.00230957	0.999855	0.0891331	0.800366	-0.21406	0.573844	22.9306	30.4411	26.0226	34.8817	33.2614	34.0249	29.2768	29.3235	32.4562	33.4382	29.4493	29.3038	ENSMUSG00000100319	upstream	53150	NA
chr1	71814391	71814616	226	-0.625577	0.876129	1.42169	0.670597	0.332928	0.643883	2.3802	0.000650005	33.8612	18.568	27.0315	18.076	19.5483	17.1522	12.6632	4.95099	5.07895	12.2472	10.3403	20.2473	ENSMUSG00000100319	upstream	60308	NA
chr1	71816415	71816652	238	0.0970938	0.990604	0.595153	0.946029	0.655001	0.160929	1.15306	0.0367859	33.2627	32.6515	20.3839	26.1556	29.3909	32.5748	35.0722	11.7534	13.8657	22.4573	15.621	20.5998	ENSMUSG00000100319	upstream	62332	NA
chr1	71893555	71893920	366	0.0361913	0.994555	-0.58447	0.707948	0.298629	0.36279	-0.322032	0.416415	51.1907	61.5739	58.4206	41.9893	61.36	68.3618	65.1614	59.6148	83.1088	51.8942	43.2436	48.2238	ENSMUSG00000102689	upstream	7786	NA
chr1	71896148	71896613	466	0.0746619	0.990604	-0.736795	0.511573	-0.334448	0.369425	-1.1459	0.000810027	26.6149	22.3459	18.8934	23.3773	28.8366	16.6369	24.0538	51.6241	47.7241	26.0115	34.8757	28.0558	ENSMUSG00000102689	upstream	10379	NA
chr1	71897751	71898022	272	0.250015	0.973902	-0.310171	0.98547	-0.347314	0.56961	-0.907499	0.135711	15.5226	17.142	7.92706	19.3102	18.9494	10.3647	14.0289	28.1102	22.6825	20.0011	19.1357	22.8314	ENSMUSG00000102689	upstream	11982	NA
chr1	71912348	71912810	463	0.896785	0.4697	0.483265	0.937132	-0.0768566	0.886017	-0.490377	0.350595	7.40928	17.4555	14.3589	22.6885	27.8307	24.356	25.2398	16.9168	20.7628	28.0353	28.219	21.8841	ENSMUSG00000099707	upstream	14461	Gm8883
chr1	71923801	71924040	240	0.407495	0.950484	0.380222	0.983547	-0.0712104	0.93284	-0.0984839	0.928609	14.2937	11.009	17.2193	12.1583	19.175	30.835	14.9057	13.9865	16.1415	17.498	15.4908	28.5994	ENSMUSG00000099707	upstream	3231	Gm8883
chr1	71938511	71939056	546	0.399596	0.90908	0.0467086	0.996879	-0.554114	0.169525	-0.907001	0.0465848	11.5993	28.1807	13.4925	22.4461	31.6914	20.0081	20.5294	37.2291	30.7458	42.6525	35.213	25.7409	ENSMUSG00000099707	downstream	8148	Gm8883
chr1	71967694	71967972	279	-0.613181	0.876129	-0.347386	0.986975	0.0945796	0.909059	0.360375	0.664108	50.1285	20.6114	30.9127	19.523	17.8142	12.6308	36.7566	22.0576	29.8274	16.0783	13.7061	35.1452	ENSMUSG00000101211	upstream	11410	NA
chr1	71971797	71972397	601	0.413719	0.707575	0.187514	0.978771	0.151495	0.595503	-0.0747093	0.860453	47.4201	55.8584	49.6288	65.7074	77.4913	56.2902	71.4281	52.7501	54.9092	59.8706	70.874	51.1213	ENSMUSG00000101211	upstream	15513	NA
chr1	71990430	71991185	756	-0.228636	0.979184	0.732427	0.956385	0.917292	0.131678	1.87836	0.00622004	18.1508	8.6345	9.26921	12.6086	7.30477	10.255	10.4103	4.68685	1.89789	2.65121	3.79366	11.2409	ENSMUSG00000101211	upstream	34146	NA
chr1	72002479	72002710	232	-0.207871	0.975691	0.234	0.990735	-0.112926	0.870413	0.328945	0.653505	32.9855	23.4471	19.3621	20.9626	24.5969	18.2276	21.5875	18.488	21.0273	28.7976	21.0614	18.3149	ENSMUSG00000059483	upstream	40737	Gm5528
chr1	72012840	72012993	154	0.124573	0.990387	-0.789113	0.905883	0.771456	0.200184	-0.14223	0.888355	27.4165	26.2399	30.3356	27.7904	23.9065	18.3065	51.1051	29.0629	32.6091	12.3953	22.762	19.1016	ENSMUSG00000059483	upstream	30454	Gm5528
chr1	72035053	72035590	538	-0.0362913	0.995667	-0.495194	0.866133	-0.707232	0.0252934	-1.16613	0.000780615	24.0341	33.222	24.0464	23.503	39.348	15.7205	25.7109	67.9396	54.6718	44.3511	44.2265	41.3119	ENSMUSG00000059483	upstream	7857	Gm5528
chr1	72076289	72076575	287	0.0502015	0.995667	0.73659	0.960109	1.60439	0.00230023	2.29078	0.000752156	16.5502	19.4953	36.3116	37.2798	18.6004	24.5575	19.9435	7.79737	2.49966	8.97902	7.03216	9.1108	ENSMUSG00000101764	inside	1315	NA
chr1	72079699	72079890	192	-0.209593	0.979184	0.691779	0.975612	2.05012	0.000185555	2.95149	6.46415e-05	41.2319	22.6656	37.4333	29.3825	26.845	31.2021	28.5692	6.79901	2.24188	6.46233	4.97918	11.9164	ENSMUSG00000101764	upstream	1809	NA
chr1	72123796	72123919	124	0.0399301	NA	-0.349498	0.990735	-0.115729	0.918506	-0.505156	0.653475	17.0248	23.8145	15.9394	21.9634	17.8142	28.4194	11.5399	16.5432	37.0271	15.3941	36.8353	7.90766	ENSMUSG00000101496	upstream	3097	Gm8885
chr1	72142017	72142284	268	-0.311632	0.970331	-0.358762	0.986975	-0.0859151	0.924489	-0.133045	0.900137	5.90786	28.4165	14.7499	13.7915	15.1111	11.8343	13.3484	19.4837	17.6673	14.6014	15.0614	13.4155	ENSMUSG00000101496	downstream	14404	Gm8885
chr1	72183151	72183513	363	-0.896318	0.691612	0.332854	0.985866	-0.0564336	0.942668	1.17274	0.0431155	27.6242	19.2671	21.2844	11.254	11.1564	11.6496	14.454	9.2473	10.6721	8.93962	10.2418	21.6099	ENSMUSG00000102123	upstream	21991	NA
chr1	72196835	72197257	423	0.183283	0.980377	-0.39162	0.97519	-0.542927	0.269888	-1.11783	0.0283214	12.4768	9.92049	9.34506	10.5774	12.185	9.16407	15.2228	25.5703	20.0126	16.0201	13.3092	24.7262	ENSMUSG00000102123	upstream	35675	NA
chr1	72225754	72226605	852	0.128351	0.974768	-0.0564661	0.996879	0.02195	0.960387	-0.162867	0.719376	28.1848	22.9848	19.4021	22.3758	29.5997	20.2671	29.1115	25.828	26.4394	25.6533	27.6777	21.0995	ENSMUSG00000039395	inside	24861	Mreg
chr1	72236336	72237192	857	0.0909642	0.985118	-0.139097	0.990735	-0.0186651	0.966218	-0.248726	0.544151	24.6333	23.2134	21.5951	25.1962	22.124	23.8497	27.272	33.0759	22.0996	23.1648	22.1865	30.8925	ENSMUSG00000039395	inside	14274	Mreg
chr1	72243708	72244628	921	0.123657	0.966557	0.104438	0.990735	-0.0616552	0.834207	-0.0808741	0.822719	52.1465	45.5631	56.5768	56.3954	53.9649	60.0726	53.8611	55.0755	53.5909	58.6548	66.663	47.9096	ENSMUSG00000039395	inside	6838	Mreg
chr1	72254602	72255710	1109	0.0287412	0.994174	0.173642	0.978918	-0.293821	0.205281	-0.14892	0.665338	50.6829	46.8085	42.2872	38.5908	42.4928	58.7863	51.397	50.9519	52.1393	55.2523	53.8297	66.6078	ENSMUSG00000039395	upstream	3136	Mreg
chr1	72283988	72284769	782	0.104941	0.976613	-0.0730919	0.99616	0.278504	0.305127	0.100471	0.813453	64.79	56.6432	59.9699	48.7575	58.6137	80.6645	73.499	50.5566	61.8323	55.5331	59.4955	43.8865	ENSMUSG00000119873	downstream	426	NA
chr1	72306977	72307666	690	0.0745147	0.986183	-0.255468	0.973622	0.459104	0.062734	0.129121	0.752608	38.6265	38.5174	53.6436	44.8271	41.3513	49.5403	49.0807	43.5137	36.5978	36.3792	32.4826	30.7902	ENSMUSG00000118790	downstream	12620	NA
chr1	72537102	72537239	138	0.0431138	0.995667	-0.231142	0.993049	0.0426453	0.961356	-0.23161	0.80553	26.7709	39.4184	18.2284	39.4704	16.007	33.1971	29.3793	37.838	29.1119	28.3564	30.0194	26.0533	ENSMUSG00000085812	downstream	37916	Gm15843
chr1	72564574	72564995	422	-0.0603109	0.995667	0.355095	0.989573	2.29064	4.48704e-06	2.70605	1.91278e-05	23.1368	16.9416	32.7852	20.283	13.0863	24.2171	36.1692	4.86104	2.72	2.71404	6.0411	6.19621	ENSMUSG00000039372	inside	11094	Marchf4
chr1	72582840	72583684	845	0.182813	0.924841	0.101817	0.990735	-0.000175567	0.999665	-0.0811716	0.818456	57.7735	62.1684	66.9813	65.1512	70.5822	80.489	68.3015	68.8568	63.335	79.4046	73.1616	57.6339	ENSMUSG00000039372	upstream	6751	Marchf4
chr1	72593370	72593859	490	-0.940617	0.135674	-1.15483	0.0248919	0.112153	0.813349	-0.102056	0.849724	39.3134	32.6701	44.0033	16.2772	21.7891	23.0139	19.9553	38.4392	44.2153	18.8939	20.811	14.6749	ENSMUSG00000039372	upstream	17281	Marchf4
chr1	72710902	72712246	1345	-0.00957476	0.998874	-0.0728857	0.99544	0.263063	0.323491	0.199752	0.576681	20.993	23.1109	22.7105	22.9968	21.4874	25.6767	18.9729	19.6886	19.2018	17.1018	17.0588	22.357	ENSMUSG00000110487	upstream	19777	Gm18035
chr1	72746343	72746641	299	-0.72657	0.856165	-0.442206	0.978771	-1.05362	0.0623262	-0.769253	0.287461	23.829	36.906	9.61498	20.8195	12.3131	4.71438	17.5478	44.9066	35.5102	37.3475	32.6839	16.3972	ENSMUSG00000110596	upstream	682	NA
chr1	72755230	72755582	353	-0.403049	0.920262	-0.832375	0.693495	-0.738395	0.0891896	-1.16772	0.0103415	23.9215	23.7754	19.8513	12.6749	18.2516	8.98471	27.0244	48.0746	52.8397	20.8191	27.985	38.8887	ENSMUSG00000046330	downstream	2258	Rpl37a
chr1	72870315	72871269	955	0.143965	0.970331	0.168317	0.986975	0.145179	0.676208	0.169531	0.695871	25.9739	22.1332	20.508	28.9253	26.6001	25.8304	18.9794	22.2613	18.3294	20.4879	24.3589	23.6153	ENSMUSG00000039323	inside	6653	Igfbp2
chr1	72872600	72872992	393	0.785319	0.616843	0.323986	0.978771	-0.164329	0.745064	-0.625661	0.214437	10.7434	18.9827	18.288	34.1546	22.0147	37.6611	20.0259	27.5223	23.0006	30.8431	32.1641	31.6038	ENSMUSG00000039323	inside	8938	Igfbp2
chr1	72885790	72886040	251	-0.632561	0.891961	-0.33691	0.989573	-0.0520924	0.956338	0.243558	0.805523	32.5913	27.8643	14.3171	20.9258	25.6685	8.42391	6.65113	23.0323	18.8639	13.6891	14.3887	23.4394	ENSMUSG00000039323	inside	5593	Igfbp2
chr1	72963417	72963886	470	0.010469	0.998874	-0.376477	0.895112	0.0868117	0.818239	-0.300134	0.408615	40.9863	48.6104	48.1695	39.7343	49.3491	53.2349	44.6536	50.3912	62.8871	37.7713	44.7491	50.7661	ENSMUSG00000026185	upstream	49374	Igfbp5
chr1	73028871	73028982	112	0.453327	0.95513	-0.241046	0.993929	0.00204866	0.998616	-0.692324	0.443381	23.5611	11.1015	30.4814	22.5797	37.8022	31.4643	25.5526	33.3013	35.8701	35.7914	35.0914	11.6732	ENSMUSG00000101968	inside	4868	1700027A15Rik
chr1	73118442	73119155	714	0.220453	0.964131	0.566498	0.83878	-0.368271	0.3326	-0.0222266	0.975352	19.9576	14.5843	21.1388	23.7036	24.4925	25.665	12.3588	15.41	21.9038	25.3982	26.3325	32.5019	ENSMUSG00000026182	upstream	63374	Tnp1
chr1	73298767	73299236	470	-0.0795669	0.994031	-0.544232	0.974375	0.263265	0.735389	-0.2014	0.841132	10.1062	10.9125	12.2335	10.3475	5.48324	14.9958	12.1782	16.268	9.46359	8.73208	4.0681	15.2994	ENSMUSG00000101112	upstream	8987	NA
chr1	73344228	73344844	617	-0.0239839	0.997305	-0.643601	0.835782	0.316492	0.510224	-0.303125	0.60584	17.9629	13.8544	12.8135	13.2421	14.619	10.2807	19.3266	16.0192	20.2314	8.66263	13.6006	13.2435	ENSMUSG00000100697	downstream	6032	NA
chr1	73363804	73363913	110	-0.484685	NA	-0.200852	0.996879	1.11114	0.215437	1.39497	0.179426	43.1811	28.2584	21.2349	21.2217	25.1018	16.0182	23.8491	18.6487	5.21746	17.3534	8.69094	0	ENSMUSG00000100697	upstream	12595	NA
chr1	73481971	73482393	423	0.765603	0.856605	-0.682692	0.931294	-0.289838	0.683061	-1.73813	0.00467435	3.74304	4.04168	5.09731	7.35821	6.96284	9.99717	5.63808	14.9895	13.9071	9.25104	8.53799	9.27234	ENSMUSG00000099877	upstream	35243	NA
chr1	73515775	73516903	1129	0.197895	0.926791	0.173102	0.978771	-0.93368	7.1439e-07	-0.958473	2.53057e-05	31.5539	36.8936	33.1031	28.6027	45.164	39.0169	43.0931	63.7591	68.1181	72.1111	78.9378	71.797	ENSMUSG00000100044	upstream	34302	Gm9553
chr1	73566820	73567154	335	0.0510985	0.995667	-0.0399566	0.996879	-0.0235366	0.971884	-0.114592	0.882723	22.8437	26.4448	17.6998	20.3243	31.8706	13.6752	24.9169	29.5039	19.2735	23.3623	23.147	24.3918	ENSMUSG00000100429	upstream	942	NA
chr1	73579889	73580154	266	0.409155	0.964131	-0.503488	0.978771	-0.272602	0.746087	-1.18524	0.118421	11.9046	14.6072	5.40391	8.77591	17.3008	9.27369	20.6214	19.6302	28.5882	11.8407	11.98	30.719	ENSMUSG00000100444	upstream	10940	NA
chr1	73723938	73724246	309	0.269864	0.970331	0.0408325	0.998047	2.00276	5.11282e-05	1.77373	0.00500601	21.3499	17.1013	35.4708	27.0709	19.0633	45.6182	29.3289	9.05278	5.57205	4.63319	10.3129	7.40437	ENSMUSG00000100444	upstream	154989	NA
chr1	73787043	73787555	513	-0.169126	0.975872	0.906483	0.776329	1.36113	0.000295598	2.43674	3.29795e-07	26.7485	23.6313	29.7715	29.5781	24.0417	27.4776	13.9468	5.45284	4.47502	11.7211	8.0754	7.00848	ENSMUSG00000101344	downstream	1925	NA
chr1	73799386	73799931	546	0.407276	0.91025	-0.30595	0.982515	0.232387	0.662358	-0.480839	0.404892	17.8823	11.1015	13.1634	22.0898	19.2172	19.3627	12.6671	22.5424	16.2926	16.6065	10.311	21.5505	ENSMUSG00000101344	inside	9906	NA
chr1	73805165	73805538	374	0.210146	0.970331	0.0679039	0.996879	1.49431	7.32237e-05	1.35207	0.00480878	22.5783	26.1805	34.1104	45.7724	30.516	28.2674	22.9563	11.4685	10.3582	12.5046	11.3607	9.61323	ENSMUSG00000101344	inside	15685	NA
chr1	73824426	73824695	270	0.194321	0.980478	-0.152987	0.995219	-0.905891	0.0555844	-1.2532	0.0212285	15.6376	21.2984	14.6406	25.2172	31.3618	9.1363	10.5996	45.5858	37.1986	36.7635	42.0956	31.4744	ENSMUSG00000101344	inside	34946	NA
chr1	73862858	73863021	164	0.228661	0.97802	-0.223848	0.993866	0.588194	0.3449	0.135685	0.895752	12.8724	31.2737	40.5376	32.0267	30.3059	25.7854	46.5348	21.6052	30.6208	29.6806	15.5448	21.9229	ENSMUSG00000101344	inside	18055	NA
chr1	73875771	73876301	531	0.0981151	0.991241	0.772711	0.819929	-1.09902	0.0110173	-0.424426	0.541768	11.43	8.48815	10.4898	13.9214	15.6	5.30923	6.73702	14.048	12.97	17.0756	27.8059	24.6215	ENSMUSG00000101344	inside	4775	NA
chr1	73901616	73901722	107	0.527809	NA	-0.122349	0.996879	0.726065	0.559559	0.0759073	0.970828	4.93241	21.788	18.4718	52.7238	8.60187	3.29346	22.2888	17.4287	12.0684	4.45998	9.92735	30.5467	ENSMUSG00000100301	inside	1903	6030407O03Rik
chr1	73907332	73907520	189	-1.23754	0.737195	0.134427	0.996879	1.94458	0.0182436	3.31655	0.000415675	36.3015	19.736	66.5482	16.4684	8.76572	16.781	27.7608	0.986705	6.83239	8.58488	2.81012	0	ENSMUSG00000100301	upstream	3707	6030407O03Rik
chr1	73932645	73933367	723	-0.15537	0.968666	0.407696	0.892113	-0.15346	0.665973	0.409607	0.263482	37.5935	37.6192	25.5976	34.9782	29.5343	23.8833	31.0071	21.6666	28.577	33.0026	34.6729	32.5494	ENSMUSG00000100301	upstream	29020	6030407O03Rik
chr1	73942309	73942610	302	-0.252309	0.930163	0.448667	0.889218	0.219943	0.538394	0.920919	0.00569026	62.039	64.3299	56.5219	60.5499	45.7153	49.0093	48.9617	28.4053	35.6325	45.8256	44.6698	40.0445	ENSMUSG00000100301	upstream	38684	6030407O03Rik
chr1	73947590	73948210	621	-0.217511	0.95687	-0.13565	0.993367	0.23846	0.549545	0.320321	0.490536	36.5443	31.2844	22.5685	26.3136	19.8605	28.3736	29.1873	22.2223	25.6462	20.9023	17.9603	28.4217	ENSMUSG00000100301	upstream	43965	6030407O03Rik
chr1	73955468	73955748	281	0.0375888	0.995376	0.138111	0.991958	0.166512	0.676572	0.267035	0.565716	59.1626	66.925	52.4333	65.075	53.7173	80.262	48.3771	48.4469	50.55	61.8176	56.3244	41.874	ENSMUSG00000100301	upstream	51843	6030407O03Rik
chr1	73958233	73958782	550	-0.214022	0.94405	0.0552902	0.996879	-0.100556	0.803564	0.168756	0.714916	52.297	66.1246	41.1631	48.4563	52.2118	29.4735	51.6007	51.1992	43.8267	44.4247	51.7594	52.296	ENSMUSG00000100301	upstream	54608	6030407O03Rik
chr1	73962917	73963945	1029	0.0760147	0.982364	0.131565	0.986975	0.0735523	0.802398	0.129103	0.701435	62.5731	81.2599	71.0688	87.5302	75.6714	75.6856	63.7366	57.8128	73.3436	73.2755	78.2476	63.21	ENSMUSG00000100301	upstream	59292	6030407O03Rik
chr1	73966640	73966812	173	-0.645499	0.801664	0.411657	0.978771	0.398693	0.470451	1.45585	0.00548269	64.0644	58.3952	38.4287	40.4808	30.8574	42.7769	23.4355	22.6372	16.5873	22.6196	25.1741	32.1182	ENSMUSG00000100301	upstream	63015	6030407O03Rik
chr1	73998130	73999178	1049	-0.133157	0.970882	0.0745725	0.99616	-0.227763	0.463517	-0.0200335	0.970137	38.4884	38.2256	33.2297	41.7253	28.779	24.1876	37.9675	29.6886	44.3161	42.2172	37.669	37.0783	ENSMUSG00000100301	upstream	94505	6030407O03Rik
chr1	74007760	74009192	1433	0.231759	0.936444	-0.131137	0.990887	0.0827409	0.838693	-0.280155	0.495361	15.2843	24.6201	15.1719	27.8292	20.8102	18.4438	19.3056	21.3426	23.5296	18.8489	18.9763	24.4054	ENSMUSG00000100301	upstream	104135	6030407O03Rik
chr1	74015574	74016090	517	-0.0338906	0.995667	-0.182835	0.993049	-0.0314879	0.964221	-0.180432	0.810357	20.927	18.6385	17.3772	23.3289	24.2117	9.54275	15.2228	19.4784	23.3121	14.215	14.1767	30.978	ENSMUSG00000100301	upstream	111949	6030407O03Rik
chr1	74027552	74027966	415	0.0995084	0.984078	0.0368196	0.996879	-0.101608	0.802125	-0.164297	0.727568	36.2443	42.3194	34.6371	41.719	31.0497	44.1562	46.5488	42.6898	42.1797	45.7669	46.5844	36.2291	ENSMUSG00000100301	upstream	123927	6030407O03Rik
chr1	74028709	74029468	760	0.0551907	0.992375	-0.282879	0.978771	0.795429	0.0100838	0.45736	0.293331	34.0272	41.3093	52.9583	39.1625	31.9718	52.3964	55.857	29.2	33.227	20.9725	20.2662	38.2758	ENSMUSG00000100301	upstream	125084	6030407O03Rik
chr1	74066019	74066338	320	-0.440721	0.887536	0.158975	0.993469	-0.351836	0.451535	0.24786	0.691599	36.2841	38.3696	33.69	22.4928	23.01	18.7213	41.7359	22.7281	37.6636	29.8261	32.1987	41.8776	ENSMUSG00000055322	inside	97270	Tns1
chr1	74083035	74083629	595	-0.266163	0.960204	-0.440042	0.961901	-0.0542228	0.931187	-0.228102	0.723924	41.6893	44.406	16.6091	38.5796	30.0097	14.2145	29.2602	34.7901	45.0938	29.5153	28.3855	30.7623	ENSMUSG00000055322	inside	79979	Tns1
chr1	74084298	74085153	856	-0.0634148	0.989487	0.303308	0.946029	0.136025	0.663688	0.502748	0.0897178	53.3317	49.2045	44.0804	58.4052	40.6439	42.815	44.2991	30.0645	38.5519	47.4988	43.308	35.1287	ENSMUSG00000055322	inside	78455	Tns1
chr1	74091187	74092627	1441	-0.15986	0.962174	-0.0190062	0.997773	0.0365229	0.924559	0.177377	0.644409	29.3001	26.5327	23.6913	28.0797	20.8224	26.6562	19.3639	21.4829	25.1912	26.1625	19.5343	23.5894	ENSMUSG00000055322	inside	70981	Tns1
chr1	74104017	74104228	212	0.252355	0.973902	-0.303484	0.987259	-0.554272	0.33542	-1.11011	0.0680862	8.71316	35.1897	22.0362	23.8578	39.0736	19.9472	23.6241	42.2235	55.4971	49.9728	42.5893	23.1262	ENSMUSG00000055322	inside	59380	Tns1
chr1	74111500	74111707	208	-0.103973	0.992241	0.0512525	0.996879	-0.868361	0.129007	-0.713136	0.333981	12.6867	14.9443	16.4131	13.0935	14.16	16.9423	11.4659	25.104	23.4535	26.1552	33.1946	12.5712	ENSMUSG00000055322	inside	51901	Tns1
chr1	74124330	74125495	1166	-0.0587896	0.99134	0.485133	0.866133	0.0367731	0.937807	0.580696	0.126748	24.2158	24.7927	22.9608	30.3644	16.7346	28.1074	17.3857	13.7546	18.2119	24.1474	18.22	25.5089	ENSMUSG00000055322	inside	38113	Tns1
chr1	74236184	74237148	965	0.176485	0.950484	0.374739	0.872911	0.0484304	0.892628	0.246685	0.486439	24.3375	37.2044	36.4946	40.3176	34.5269	37.9789	36.3297	24.1564	31.2237	34.3201	35.9946	38.2736	ENSMUSG00000048480	upstream	2394	Cxcr1
chr1	74240220	74240396	177	-0.623489	0.860038	-0.759638	0.900162	0.820483	0.140078	0.684334	0.315534	58.144	57.9536	48.7268	37.3678	33.28	27.8735	43.117	27.3936	40.5311	31.2753	21.0045	1.84661	ENSMUSG00000087820	downstream	5317	Mir1928
chr1	74284176	74285124	949	0.0945746	0.97077	0.0514841	0.99616	0.185288	0.380554	0.142197	0.618709	78.1364	88.1101	89.7453	99.0087	83.6022	82.4371	99.5177	76.4421	78.4681	78.648	89.7687	70.9495	ENSMUSG00000006304	inside	8933	Arpc2
chr1	74295185	74296188	1004	-0.151249	0.940885	0.00473669	0.999855	-0.366495	0.0526596	-0.21051	0.43848	104.607	122.293	116.864	106.954	109.275	84.5901	111.169	112.561	152.626	142.88	129.498	126.638	ENSMUSG00000006304	inside	11180	Arpc2
chr1	74297433	74297537	105	0.211007	0.974705	-0.220374	0.990887	0.531316	0.300775	0.0999356	0.910332	40.2109	105.094	83.8507	75.9603	70.1258	83.9048	131.738	49.7299	94.287	59.0841	56.6521	74.7086	ENSMUSG00000064272	upstream	20172	Gpbar1
chr1	74303616	74304538	923	0.0845395	0.984078	0.316602	0.94071	0.154695	0.623612	0.386757	0.240717	40.3117	41.7599	35.4299	45.7352	42.0812	35.1255	42.3754	27.276	32.489	43.9475	39.8191	25.8505	ENSMUSG00000064272	upstream	13171	Gpbar1
chr1	74322892	74323175	284	0.161041	0.990025	0.110328	0.996879	-0.675936	0.370827	-0.72665	0.442281	13.9375	6.56708	6.32676	11.6446	6.48169	14.8902	6.71805	6.56645	21.7241	14.1149	11.9687	21.8667	ENSMUSG00000006299	inside	722	Aamp
chr1	74332259	74332809	551	0.00855341	0.998874	0.212648	0.974375	-0.339863	0.127447	-0.135768	0.696125	61.3016	62.3376	62.6108	63.5497	71.1598	47.3278	65.3577	66.3366	70.0475	77.7753	82.896	75.9288	ENSMUSG00000099931	upstream	1953	NA
chr1	74342435	74342614	180	0.0324502	0.997305	-0.0320398	0.998184	-0.554118	0.34271	-0.618608	0.385984	24.9224	25.9035	23.9573	39.9873	29.6573	3.91556	23.8491	38.3335	38.2614	36.0565	38.3582	38.1325	ENSMUSG00000006301	inside	2167	Tmbim1
chr1	74361867	74362234	368	-0.133457	0.985118	0.108941	0.996531	-0.21285	0.698757	0.0295482	0.972051	19.3611	20.2723	18.0657	17.9731	14.0061	16.2794	22.0345	17.7366	19.8845	16.8582	17.6076	29.3099	ENSMUSG00000103403	downstream	11995	NA
chr1	74368021	74368586	566	-0.37751	0.847905	0.209499	0.983547	-0.504411	0.0869226	0.0825978	0.877785	56.4134	56.8412	34.9201	41.2437	35.7753	46.0735	29.4953	38.22	54.5022	58.0081	49.1702	54.2825	ENSMUSG00000103403	downstream	18149	NA
chr1	74383367	74383695	329	0.164275	0.978789	0.374242	0.974375	-0.468077	0.275274	-0.25811	0.682185	38.4998	51.4921	26.2147	46.7115	61.5465	24.6359	38.4195	31.7425	60.6193	54.2491	64.2501	62.5883	ENSMUSG00000073650	upstream	17572	Catip
chr1	74386664	74387290	627	0.173709	0.952037	0.167873	0.983547	-0.15233	0.613199	-0.158166	0.679812	61.8676	78.8259	62.4725	86.8726	71.0485	70.8173	77.2147	57.4036	93.5939	91.0292	86.5706	76.6299	ENSMUSG00000073650	upstream	13977	Catip
chr1	74391339	74392369	1031	0.297617	0.822094	0.234318	0.96932	0.303977	0.179986	0.240677	0.436681	40.952	57.7364	56.8144	75.662	58.3843	61.5248	60.3744	39.6127	48.4298	52.5819	52.4416	50.4065	ENSMUSG00000073650	upstream	8898	Catip
chr1	74396691	74398300	1610	0.354457	0.801671	0.125958	0.990735	0.20111	0.491513	-0.0273899	0.956259	24.5855	36.104	38.1681	55.4599	38.7597	34.3645	40.1435	33.8225	33.6867	36.3397	40.9716	32.685	ENSMUSG00000073650	upstream	2967	Catip
chr1	74437859	74439325	1467	-0.0733552	0.989821	0.0774852	0.996358	-0.907442	0.000595639	-0.756602	0.0232235	20.6862	26.5921	16.045	22.2778	22.2101	11.2903	23.7353	30.382	40.9804	34.6772	39.6072	38.9903	ENSMUSG00000065468	downstream	4306	Mir26b
chr1	74452635	74453002	368	-0.582088	0.797765	-0.222682	0.98867	-0.490916	0.246939	-0.13151	0.844403	25.0977	35.4765	28.3191	27.4883	18.0078	13.4065	19.4422	24.8312	40.1589	26.7138	27.1329	31.0863	ENSMUSG00000026175	inside	4100	Vil1
chr1	74485889	74486031	143	-0.402669	NA	-3.03156	0.609042	5.28138	2.96967e-05	2.65248	0.00361783	36.9069	16.3029	43.9776	27.2074	16.7346	19.7147	33.3553	5.21643	5.01679	1.33488	0	0	ENSMUSG00000026175	downstream	11171	Vil1
chr1	74505453	74506807	1355	0.363264	0.743387	0.292943	0.937132	0.455331	0.0337409	0.38501	0.176137	35.2495	42.8985	49.5943	69.4862	52.9825	45.2529	51.2183	33.7191	31.7668	40.2202	40.6076	39.3185	ENSMUSG00000103227	downstream	32692	NA
chr1	74587328	74588526	1199	0.112306	0.963353	0.147643	0.978771	0.0815609	0.72842	0.116898	0.67624	69.1073	83.0899	72.2317	90.2086	79.2205	74.9475	79.1654	70.6132	67.7313	81.5927	78.4931	68.4231	ENSMUSG00000033364	upstream	3885	Usp37
chr1	74600547	74601684	1138	-0.144777	0.972752	0.0485598	0.996879	0.0671821	0.877602	0.260519	0.551029	32.4638	22.9444	25.2626	26.667	18.4404	33.1343	19.49	21.1396	23.4511	27.0899	22.8687	18.3817	ENSMUSG00000033364	upstream	17104	Usp37
chr1	74661369	74662212	844	0.0931974	0.975348	0.155488	0.983216	0.163047	0.516573	0.225337	0.451529	42.5216	46.7736	49.1778	53.0124	46.6743	43.4237	53.6886	38.6674	40.4601	41.5021	47.5736	42.9862	ENSMUSG00000033276	inside	13841	Stk36
chr1	74712860	74714470	1611	0.112136	0.973902	0.205595	0.978771	0.355084	0.158345	0.448542	0.138787	25.2254	24.6011	19.0722	26.9279	29.0232	22.9684	19.6892	17.1323	16.4766	17.5365	19.7148	21.3031	ENSMUSG00000033257	inside	11956	Ttll4
chr1	74748891	74749658	768	-0.0354376	0.994174	-0.0204614	0.997466	-0.161001	0.632342	-0.146024	0.735917	25.7699	25.7011	24.7996	27.3561	22.2909	27.9901	22.048	24.0394	31.9468	26.0979	29.7368	27.2375	ENSMUSG00000026170	upstream	3075	Cyp27a1
chr1	74759913	74760094	182	-0.430073	0.92781	-0.301741	0.988566	0.424675	0.483145	0.553007	0.419142	37.6977	30.7426	28.6303	29.9281	27.3086	19.3627	17.035	22.5424	21.2855	17.3057	18.0929	17.9588	ENSMUSG00000026170	inside	7180	Cyp27a1
chr1	74772861	74773463	603	0.106407	0.979184	0.060894	0.996879	-0.162092	0.627043	-0.207605	0.608059	56.0152	68.045	42.0147	59.3599	56.1704	66.6229	57.3485	51.9566	75.6662	68.5358	76.0998	53.6619	ENSMUSG00000006542	downstream	4618	Prkag3
chr1	74775803	74776089	287	-0.185273	0.979184	0.207632	0.990887	-0.724408	0.119315	-0.331503	0.637074	45.0534	53.6121	17.5298	40.6688	37.8423	24.5575	31.5772	29.2402	67.4907	53.209	68.471	45.554	ENSMUSG00000006542	downstream	1992	Prkag3
chr1	74788036	74788145	110	-0.200899	0.986607	0.16246	0.996739	-0.404943	0.62373	-0.0415842	0.975194	47.9789	25.4325	11.4342	24.7587	23.4284	12.8146	32.5214	22.0394	33.9135	29.5008	32.8324	32.685	ENSMUSG00000006542	inside	235	Prkag3
chr1	74797418	74797745	328	0.0354515	0.995667	-0.00718342	0.999855	-0.747916	0.130344	-0.790551	0.192757	14.4814	20.8492	14.7907	23.1304	20.7651	5.37195	17.4505	28.9965	29.3085	32.2995	35.2996	16.9404	ENSMUSG00000006542	upstream	9038	Prkag3
chr1	74806366	74807371	1006	0.120381	0.977411	-0.312023	0.958493	-0.318401	0.305442	-0.750805	0.0176187	24.6572	23.0196	21.2544	27.8456	33.4857	18.5658	18.4913	41.8947	35.3709	31.688	33.5773	27.2916	ENSMUSG00000033227	upstream	3680	Wnt6
chr1	74807922	74808569	648	-0.150685	0.968666	0.0802395	0.995219	-0.284196	0.337307	-0.0532717	0.916329	31.7638	37.656	29.1148	30.9211	28.6915	34.805	25.0268	30.5056	37.6414	38.4426	34.424	35.3079	ENSMUSG00000033227	upstream	2482	Wnt6
chr1	74816626	74817237	612	-0.0407428	0.994174	0.354184	0.959641	0.0369854	0.939096	0.431912	0.307821	23.7151	30.7287	28.7723	31.7864	25.8675	32.2458	19.0948	17.9783	23.21	26.0443	29.8534	22.4309	ENSMUSG00000099472	upstream	62	NA
chr1	74854806	74855008	203	-0.15701	0.984078	0.0377933	0.997135	0.0478863	0.94697	0.242689	0.750419	24.6985	65.0777	47.7967	54.6225	46.2467	43.399	22.3218	42.2582	36.7535	47.4867	43.4309	27.3717	ENSMUSG00000026167	downstream	11468	Wnt10a
chr1	74893203	74893345	143	-0.513121	NA	0.0861716	0.996879	0.608145	0.504894	1.20744	0.213243	36.9069	22.8241	25.1301	14.964	11.5855	27.1077	26.6843	7.82464	16.0537	9.34413	5.19971	29.7136	ENSMUSG00000090071	upstream	748	Cdk5r2
chr1	74964551	74964821	271	-0.164381	0.987134	0.0847822	0.996879	0.114632	0.890058	0.363795	0.679081	21.4223	23.5139	18.5647	22.2528	26.4912	22.1063	4.4002	16.5155	16.4129	14.792	15.2866	24.1218	ENSMUSG00000047021	inside	9937	Cfap65
chr1	75015689	75016213	525	-0.354876	0.934032	0.106302	0.996739	-0.309061	0.550804	0.152117	0.83775	16.0844	25.4594	13.3477	10.7456	12.9733	22.8221	12.7195	14.2085	18.8574	18.7251	19.2212	14.9417	ENSMUSG00000103145	downstream	20689	NA
chr1	75016991	75017122	132	0.65946	0.894675	0.185524	0.99616	0.518493	0.468843	0.044557	0.972346	9.99561	28.2584	21.7794	41.2645	23.7073	37.3758	28.908	16.9534	22.8264	18.7995	32.1887	14.8568	ENSMUSG00000103145	downstream	21991	NA
chr1	75051550	75051736	187	-0.681115	0.83361	-0.328657	0.990735	1.69004	0.00212798	2.04249	0.00109715	46.5678	29.9206	46.1211	20.8056	30.516	22.6139	26.7824	14.9589	5.37092	8.1663	7.95249	6.99144	ENSMUSG00000026162	inside	45252	Nhej1
chr1	75124422	75125393	972	0.232598	0.902466	0.146189	0.986975	0.399279	0.0842727	0.312869	0.317107	43.9807	55.8044	73.0181	78.6536	63.0645	60.9087	68.701	43.7439	49.3029	51.1586	55.4062	47.4134	ENSMUSG00000049339	overlapEnd	135	Retreg2
chr1	75141511	75143245	1735	0.224992	0.893945	0.266986	0.942273	0.259407	0.258745	0.3014	0.290158	30.8752	38.161	35.7289	50.343	33.2087	38.3883	41.6499	27.1938	29.6057	32.1263	35.7545	34.8514	ENSMUSG00000026197	upstream	2045	Zfand2b
chr1	75168398	75169250	853	0.447802	0.628217	-0.0616781	0.996358	0.379278	0.100608	-0.130203	0.729211	32.1735	43.1826	44.6567	64.084	57.8352	50.815	46.1324	41.976	46.0886	43.7497	40.4717	42.5326	ENSMUSG00000026199	overlapStart	397	Ankzf1
chr1	75179413	75180679	1267	0.363313	0.805266	0.295965	0.956385	0.265326	0.349316	0.197979	0.615141	28.3254	26.9871	18.8614	33.9319	32.5445	27.2575	32.5642	20.0176	22.8753	24.7837	22.6362	33.0204	ENSMUSG00000026200	inside	4533	Glb1l
chr1	75191703	75192654	952	-0.0655173	0.982364	0.227779	0.94071	-0.0406783	0.878788	0.252618	0.293027	63.7535	73.629	73.4197	66.6152	68.8367	61.0778	72.1484	57.004	61.1901	73.0866	65.6081	69.0093	ENSMUSG00000026202	inside	831	Tuba4a
chr1	75210455	75211088	634	-0.0743456	0.98866	0.00182938	0.999855	0.249497	0.431881	0.325672	0.387847	53.6925	39.4681	38.8268	47.5592	36.003	42.2436	40.25	36.768	33.0412	33.2698	28.985	44.8516	ENSMUSG00000096094	upstream	1709	A630095N17Rik
chr1	75218754	75219704	951	-0.0468803	0.993709	0.177346	0.989596	0.130001	0.772369	0.354228	0.447409	26.3607	28.2732	19.6495	33.5472	24.1956	24.4568	13.2913	19.4135	19.3117	20.8752	21.4456	23.7147	ENSMUSG00000026203	inside	2632	Dnajb2
chr1	75236091	75237345	1255	-0.063588	0.987115	-0.00849136	0.999833	0.151572	0.566199	0.206669	0.509687	45.8381	59.0724	52.687	60.4524	50.457	40.7156	49.0284	40.8637	50.3038	45.6304	48.0753	41.9305	ENSMUSG00000026204	inside	3801	Ptprn
chr1	75248161	75248316	156	0.259604	0.974768	0.924761	0.899864	0.778768	0.210063	1.44392	0.0542093	45.6723	22.9146	25.3395	54.8682	34.22	33.8846	22.9318	16.736	6.43821	24.4727	14.2992	27.2375	ENSMUSG00000100556	upstream	933	NA
chr1	75316630	75318167	1538	0.20045	0.920262	0.290022	0.937132	0.538456	0.0092029	0.628028	0.0121013	91.9648	96.6076	147.202	121.551	118.371	131.062	144.211	82.9371	62.2245	84.6457	96.4153	84.5814	ENSMUSG00000026208	upstream	18806	Des
chr1	75344357	75345836	1480	0.0206699	0.995667	0.115268	0.993929	-0.66855	0.0165306	-0.573952	0.110222	31.2025	45.5761	27.0734	47.9759	40.6718	22.6203	28.5222	46.2438	57.0043	55.6539	61.5086	50.3526	ENSMUSG00000085653	overlapEnd	499	Gm15179
chr1	75347374	75347649	276	-0.127072	0.985118	-0.177572	0.992281	0.167105	0.763642	0.116605	0.874395	40.1563	29.8453	55.9873	26.0786	32.6809	53.6261	44.0689	40.5407	36.9098	36.6559	25.4011	42.6326	ENSMUSG00000085653	inside	2518	Gm15179
chr1	75360114	75360649	536	0.151727	0.972476	0.14195	0.990887	-0.363559	0.266242	-0.373336	0.368452	28.5546	44.0746	46.9313	55.8918	51.1715	32.2157	37.3754	45.578	58.3558	62.3233	61.4347	46.9542	ENSMUSG00000026207	inside	8173	Speg
chr1	75369814	75370664	851	-0.168813	0.97077	0.0571871	0.996879	-0.858989	0.00398706	-0.632989	0.102669	16.7447	23.3771	15.2021	21.7163	16.8722	8.69613	17.3753	26.9541	30.5169	29.6088	28.3343	32.2625	ENSMUSG00000086053	inside	1039	NA
chr1	75398711	75399348	638	0.259001	0.901237	0.293542	0.956385	0.0294841	0.938815	0.064025	0.892349	33.5025	37.759	52.1016	53.3593	46.4528	46.9499	50.8381	37.1221	41.8297	52.6585	49.282	42.0089	ENSMUSG00000033021	upstream	13226	Gmppa
chr1	75435623	75436303	681	0.0837293	0.984078	0.115008	0.990857	-0.0768025	0.823273	-0.0455235	0.923197	32.9371	47.2425	34.8278	42.8486	41.0869	42.4329	37.4721	39.7073	40.0312	41.6252	46.9501	40.3163	ENSMUSG00000033007	inside	8543	Asic4
chr1	75445344	75446043	700	0.216595	0.960705	0.221931	0.983677	0.18514	0.655318	0.190476	0.722978	19.2258	21.981	20.0215	26.9567	22.3526	31.716	14.9908	16.5174	19.2673	19.0887	20.6375	23.8134	ENSMUSG00000102605	inside	130	NA
chr1	75457878	75459029	1152	0.0315398	0.995667	-0.0571307	0.996879	0.122872	0.776585	0.0342016	0.956917	28.4042	24.0147	18.7167	20.4327	18.6956	32.1198	26.2919	20.2352	25.7816	20.3812	17.1505	30.3585	ENSMUSG00000051703	inside	1702	Tmem198
chr1	75467434	75468057	624	0.4853	0.733469	0.119834	0.993469	0.644432	0.0188689	0.278966	0.520949	24.1048	25.9035	23.0359	38.9689	33.63	35.5789	28.2825	16.4372	23.4535	20.9548	22.9809	21.4757	ENSMUSG00000051703	downstream	5085	Tmem198
chr1	75478582	75479696	1115	0.195283	0.902466	0.307712	0.863573	0.22606	0.283814	0.338488	0.16821	61.5335	64.3986	79.1237	91.7705	68.5141	75.853	77.2154	56.5315	51.8588	67.1101	66.5916	67.422	ENSMUSG00000026211	inside	3400	Obsl1
chr1	75487414	75488199	786	-0.223749	0.931075	-0.00918592	0.999855	0.33734	0.241237	0.551903	0.0820247	33.5731	34.9994	25.3747	28.7096	26.6986	22.8657	28.2184	21.1162	21.5403	21.8573	20.8121	20.792	ENSMUSG00000082745	downstream	2552	NA
chr1	75505548	75506683	1136	-0.0795691	0.985782	0.126985	0.990735	-0.00928155	0.982656	0.197272	0.621826	27.8751	30.0991	21.9855	30.8238	26.5749	24.8169	18.2647	22.9826	23.4924	24.197	26.1816	25.8948	ENSMUSG00000026213	inside	7296	Stk11ip
chr1	75521233	75522045	813	-0.162409	0.936444	0.214105	0.967526	-0.0753278	0.785201	0.301186	0.245111	56.8016	60.792	61.8824	52.641	49.3597	57.2163	55.7358	43.1237	53.8271	54.5895	57.7496	57.0882	ENSMUSG00000006576	upstream	865	Slc4a3
chr1	75546186	75546773	588	-0.157948	0.966557	0.0106785	0.999833	0.0983011	0.789948	0.266927	0.480733	47.1222	46.7849	37.2805	38.0463	39.4457	46.747	33.2589	32.0327	40.2623	41.229	34.143	33.352	ENSMUSG00000083244	downstream	968	Gm15180
chr1	75559455	75559895	441	-0.0351074	0.99457	0.0686027	0.996879	0.0604203	0.884667	0.16413	0.717913	43.6815	60.6177	77.8206	55.1396	50.9247	59.932	73.5481	49.0533	59.8648	56.7035	54.4361	61.516	ENSMUSG00000083244	downstream	14237	Gm15180
chr1	75573822	75574071	250	-0.524352	0.940885	-0.497422	0.978771	-1.01919	0.121203	-0.992255	0.20131	20.0552	17.4071	7.90592	8.55943	3.6816	11.2768	19.0793	35.0596	24.6786	13.3621	20.8196	31.3776	ENSMUSG00000082528	upstream	27227	NA
chr1	75653770	75654028	259	0.258584	0.969197	-0.191536	0.993214	0.252899	0.672998	-0.19722	0.80441	20.3772	16.2022	19.4249	17.2751	28.4294	25.8518	17.4955	24.4809	18.2813	16.9514	18.4557	21.4535	ENSMUSG00000082012	downstream	39947	Gm5257
chr1	75693251	75693556	306	-0.363152	0.962174	-0.229605	0.990735	-1.76375	0.000147351	-1.6302	0.00235802	9.48603	15.7453	8.22065	5.72155	13.2345	8.06144	7.79381	35.9567	34.2289	35.5574	32.6305	19.2265	ENSMUSG00000082012	downstream	79428	Gm5257
chr1	75798704	75799031	328	0.0594566	0.995667	0.165132	0.995219	-1.12264	0.0300917	-1.01697	0.120741	21.7222	5.68613	9.31268	10.6756	16.8366	13.9671	7.27106	23.3109	24.0592	21.824	32.7088	24.9123	ENSMUSG00000082012	downstream	184881	Gm5257
chr1	75925854	75926065	212	-0.274734	0.97301	0.461317	0.978771	-0.702344	0.23935	0.0337062	0.976418	16.1816	13.1961	31.3592	10.0937	14.7611	19.9472	23.6241	19.3524	20.3038	27.4625	21.0441	35.4601	ENSMUSG00000099996	downstream	67230	NA
chr1	75936566	75936858	293	-0.520041	0.90908	-0.252509	0.989596	-0.983099	0.047064	-0.715567	0.251658	18.9132	20.157	13.4913	11.9508	11.3087	4.81092	19.5351	33.7332	23.995	19.5448	24.2898	30.1193	ENSMUSG00000099996	downstream	56437	NA
chr1	76039021	76039849	829	0.317505	0.920643	0.173774	0.990735	-0.213634	0.617972	-0.357365	0.469865	16.2341	26.6222	17.9897	17.8341	23.9815	23.8051	36.536	20.6958	31.4999	33.388	31.0083	23.2619	ENSMUSG00000099996	upstream	43628	NA
chr1	76112959	76113830	872	0.240687	0.936444	-0.311545	0.966254	0.223046	0.526233	-0.329186	0.417053	24.5122	18.18	17.3086	21.6395	28.2875	16.9734	25.7089	25.4495	24.3521	21.8907	19.9776	17.6169	ENSMUSG00000101763	upstream	25742	NA
chr1	76184190	76185159	970	0.161969	0.97301	-0.235011	0.980915	-0.639502	0.0423602	-1.03648	0.00320627	9.79364	18.7467	11.2995	13.4368	18.9773	13.8054	13.7685	31.3375	24.1106	25.878	23.2157	20.8914	ENSMUSG00000101763	upstream	96973	NA
chr1	76244654	76245130	477	0.455191	0.889436	-0.0751435	0.996879	-0.43326	0.33413	-0.963595	0.0410953	22.6819	19.224	10.1706	12.2348	26.6279	28.8126	27.4989	28.9309	37.9004	27.2124	32.7353	36.3167	ENSMUSG00000100827	upstream	152199	NA
chr1	76373899	76374355	457	0.159972	0.970331	-0.0478538	0.996879	-0.17317	0.652028	-0.380996	0.353126	37.5328	48.6328	31.4538	35.3309	48.7389	41.6403	50.0987	59.578	43.3266	49.9147	57.4113	39.3364	ENSMUSG00000100827	upstream	22974	NA
chr1	76402894	76403489	596	0.42347	0.930882	-0.353728	0.978771	-0.805786	0.0800409	-1.58298	0.00156587	7.5269	12.5171	4.82362	7.50713	14.8252	5.91276	16.0061	28.4737	21.9072	18.256	19.2484	21.9362	ENSMUSG00000100827	inside	5565	NA
chr1	76724298	76725129	832	0.0857967	0.989375	-0.178175	0.989573	0.355817	0.330145	0.0918453	0.87882	23.1533	20.1748	18.3567	16.1331	26.1075	18.213	26.0849	21.2936	17.2452	13.9953	15.7036	22.7852	ENSMUSG00000098611	downstream	238018	Mir6343
chr1	76866485	76866651	167	0.917759	NA	-0.457277	0.989573	-0.590238	0.598209	-1.96527	0.0824541	4.74043	1.86133	4.30371	11.6487	5.51138	4.22036	4.28426	14.517	12.8874	9.71582	7.63276	13.7003	ENSMUSG00000100534	downstream	458	NA
chr1	76928117	76928360	244	-0.731064	0.828545	-0.479597	0.980014	1.69899	0.00228435	1.95045	0.00217362	50.8302	26.1158	62.5934	12.7562	20.3695	33.2181	46.9162	12.2287	11.7607	9.3879	5.6594	12.0559	ENSMUSG00000100534	inside	61008	NA
chr1	76942594	76943539	946	0.0136777	0.998874	0.340789	0.958744	-0.805892	0.00473728	-0.478781	0.231612	20.3632	18.5651	13.2956	16.0397	23.5451	11.9205	17.3952	26.2186	22.1439	31.7809	33.7981	25.222	ENSMUSG00000100534	inside	60890	NA
chr1	77140519	77141359	841	0.717719	0.592668	0.468006	0.861196	-1.29459	1.85514e-06	-1.54431	4.99438e-06	6.90303	10.3491	7.26411	12.4908	16.8539	14.6659	10.4925	25.0571	23.3731	35.8623	35.8707	27.5938	ENSMUSG00000102904	upstream	16890	NA
chr1	77213599	77213799	201	0.161134	0.98993	0.560887	0.974375	-1.06777	0.07999	-0.668017	0.449983	10.5029	8.50562	12.515	7.74259	13.7373	14.0259	11.8652	17.6281	15.7043	28.0158	29.5944	13.009	ENSMUSG00000102904	upstream	89970	NA
chr1	77232991	77233292	302	0.627723	0.801336	0.0927207	0.996879	0.485205	0.299964	-0.0497973	0.954732	17.4758	18.0124	20.2289	23.1893	28.6482	44.3418	21.322	18.5252	19.9542	21.4906	22.5108	16.2343	ENSMUSG00000102904	upstream	109362	NA
chr1	77364684	77364844	161	-0.0479876	0.995667	0.201092	0.995219	-0.0908542	0.922344	0.158225	0.888181	32.7806	19.307	25.6686	28.9986	25.1538	21.8882	22.2196	9.26645	35.6473	26.6768	34.9677	14.2109	ENSMUSG00000099141	downstream	108446	Mir6352
chr1	77402763	77403208	446	-0.434163	0.927288	-0.317721	0.983677	-0.649167	0.21076	-0.532725	0.418951	14.7917	17.4239	19.7406	5.67023	12.7948	12.6422	20.8546	27.5968	22.841	16.6919	14.7664	31.5124	ENSMUSG00000099141	downstream	70082	Mir6352
chr1	77462294	77462511	218	-0.784636	0.794048	-0.645292	0.905883	-1.10556	0.0251596	-0.966219	0.0849547	30.2619	18.5364	21.4297	10.7082	9.28845	25.8642	10.9399	41.0614	48.7043	27.1445	31.6719	26.9876	ENSMUSG00000099141	downstream	10779	Mir6352
chr1	77471144	77471805	662	0.439619	0.903364	-0.703618	0.806164	0.115142	0.849106	-1.02809	0.0299216	11.1613	5.6346	7.32834	8.52182	10.0104	11.7112	12.609	16.3388	15.6051	10.3806	8.82514	10.3684	ENSMUSG00000099141	downstream	1485	Mir6352
chr1	77485144	77485530	387	0.107805	0.990105	-0.476381	0.960567	-0.311623	0.578768	-0.895809	0.0937726	11.5918	12.0481	12.0715	11.0587	10.4645	14.5695	16.0226	24.094	20.3912	18.4968	11.528	18.5806	ENSMUSG00000026235	inside	6195	Epha4
chr1	77514662	77516512	1851	0.121304	0.967143	-0.0300999	0.996879	-0.146357	0.557938	-0.29776	0.268801	36.9238	33.7543	30.7718	30.7931	34.3099	45.8825	36.8494	42.617	40.3853	37.0224	40.6297	44.8514	ENSMUSG00000101849	downstream	20897	NA
chr1	77524253	77524543	291	-0.517246	0.931075	-0.645436	0.94071	-1.38619	0.0108029	-1.51438	0.0123349	9.06819	18.1592	9.26186	10.0275	11.3864	9.68798	3.27822	28.1974	42.4031	23.9429	28.472	13.4783	ENSMUSG00000101506	upstream	22766	NA
chr1	77536016	77536182	167	-0.383206	0.952311	-0.635499	0.956385	0.412972	0.538593	0.160679	0.868729	45.8242	39.0879	46.2649	9.31893	34.1706	59.0851	35.7022	31.2673	46.3948	25.7183	22.8983	27.4006	ENSMUSG00000101506	upstream	11127	NA
chr1	77874120	77874465	346	-0.0676611	0.994522	0.316653	0.984849	-1.10789	0.0208175	-0.723574	0.270206	16.7788	10.7806	8.82821	14.0558	15.9607	6.11099	7.58207	23.7151	15.7579	25.6539	20.8761	27.3949	ENSMUSG00000065215	downstream	455	Gm26263
chr1	78018202	78018435	234	-0.0661539	0.995667	-0.710449	0.937132	-0.355209	0.614333	-0.999504	0.137798	15.7879	31.8812	12.2858	18.2894	33.04	6.02394	17.3262	43.8325	37.403	22.4333	29.0523	22.3487	ENSMUSG00000102052	upstream	69189	NA
chr1	78019027	78019614	588	-0.0281132	0.997305	-0.238551	0.989573	-1.21395	0.002377	-1.42439	0.00244814	11.6683	23.5246	7.94503	16.2111	18.1576	5.9932	15.4127	36.1557	41.9704	36.3595	36.4914	25.5699	ENSMUSG00000102052	upstream	70014	NA
chr1	78203668	78204027	360	0.01443	0.998874	-0.620149	0.920744	0.116646	0.864918	-0.517934	0.410004	17.5923	14.2469	14.9733	10.267	14.8287	26.43	13.2495	23.3109	21.1235	13.5212	16.5235	12.7108	ENSMUSG00000118426	upstream	9555	NA
chr1	78338277	78338569	293	-0.430643	0.93262	0.247604	0.993049	0.979025	0.0734424	1.65727	0.00757768	36.0251	16.9743	22.69	11.2869	21.3608	24.0546	17.9071	9.54713	6.36602	7.81791	9.78843	11.1553	ENSMUSG00000102945	upstream	13682	NA
chr1	78488495	78489516	1022	0.0767483	0.987591	-0.0965612	0.995158	0.537911	0.03628	0.364601	0.301425	35.6321	37.7147	59.6003	51.0125	44.6691	43.4466	48.0715	41.0564	28.2187	32.0324	29.1021	36.4588	ENSMUSG00000090486	overlapStart	300	NA
chr1	78536901	78538002	1102	-0.420587	0.757894	-0.271429	0.973622	-0.211819	0.506888	-0.0626601	0.899075	41.6659	37.9385	51.3604	23.6546	31.905	29.1002	45.8802	42.8142	48.3041	39.6671	34.7007	39.1508	ENSMUSG00000119116	downstream	45951	NA
chr1	78642404	78642799	396	-1.22178	0.662119	0.0520482	0.997833	1.03274	0.166764	2.30657	0.00268736	29.3205	11.3818	19.057	6.87742	6.50788	10.6788	10.2382	5.1802	2.89859	3.85631	1.34119	9.07916	ENSMUSG00000079470	inside	6430	Utp14b
chr1	78657574	78658553	980	-0.00043867	0.999671	-0.0668375	0.995219	-0.132674	0.613157	-0.199073	0.515669	74.8569	86.7503	85.2563	63.9179	79.6428	86.6617	100.263	101.426	87.9914	96.4175	93.6493	79.7114	ENSMUSG00000079470	downstream	8345	Utp14b
chr1	78745083	78746157	1075	-0.314072	0.90908	-0.07312	0.996879	-0.709757	0.0167274	-0.468804	0.239194	29.7023	19.8071	14.8758	11.9434	20.5485	19.9967	16.1952	27.7562	30.965	25.8364	27.9637	30.4046	ENSMUSG00000099377	downstream	14696	Gm6159
chr1	78810795	78810988	194	0.143015	0.989821	-0.333454	0.98867	0.0608123	0.945805	-0.415657	0.635854	16.3227	17.6251	31.4903	14.0384	26.5683	23.6144	33.192	29.7995	28.844	23.1229	12.0459	38.7502	ENSMUSG00000101324	downstream	10426	NA
chr1	78811857	78812528	672	-0.077148	0.98866	-0.230147	0.978918	0.362267	0.241408	0.209268	0.634898	36.9124	46.7188	54.2783	29.8168	47.9375	43.0012	54.6541	36.6314	43.1295	34.7972	37.1463	29.183	ENSMUSG00000101324	downstream	11488	NA
chr1	78816743	78816983	241	-0.0848735	0.990387	0.219731	0.987259	-0.631258	0.088506	-0.326653	0.548121	36.1335	46.4328	35.7869	27.4444	33.608	57.0274	35.6252	42.5593	56.5586	56.6325	50.6871	69.1674	ENSMUSG00000101324	downstream	16374	NA
chr1	78819097	78820288	1192	-0.221626	0.926791	0.230148	0.976312	0.0804251	0.820882	0.5322	0.0754497	31.2145	27.642	25.4748	20.3998	25.172	30.1551	21.2081	20.6513	18.1758	21.5389	25.5754	20.5652	ENSMUSG00000101324	downstream	18728	NA
chr1	78838614	78838720	107	0.397914	NA	-0.0271188	0.999855	-1.10853	0.359622	-1.53357	0.286038	0	8.71519	6.71701	5.45419	13.763	9.88038	0	17.4287	14.7503	13.3799	20.8474	12.2187	ENSMUSG00000101324	downstream	38245	NA
chr1	78852080	78852780	701	-0.247562	0.931075	-0.107895	0.995158	0.725431	0.00937289	0.865099	0.008429	41.7848	34.5873	40.7548	26.3632	25.4719	41.2223	39.8051	22.3465	20.4679	20.2869	17.5775	22.3806	ENSMUSG00000101324	downstream	51711	NA
chr1	78859977	78860486	510	-0.0517151	0.991343	0.0149447	0.99854	0.0353288	0.933423	0.101989	0.830828	52.2594	52.4165	59.8933	37.7622	62.8038	54.5875	57.0507	44.6107	57.3921	50.3418	58.9431	44.2209	ENSMUSG00000101324	downstream	59608	NA
chr1	78864001	78864908	908	0.0943563	0.985118	0.0325887	0.996879	-0.821289	0.00113868	-0.883056	0.00366517	13.078	20.5402	17.4139	16.9252	22.3005	14.3599	19.1738	32.4504	31.1295	34.3723	33.5748	28.7973	ENSMUSG00000101324	downstream	63632	NA
chr1	78891333	78891536	204	-0.276093	NA	-1.05159	0.880564	-1.06612	0.205002	-1.84161	0.0289791	2.5871	8.38054	10.5694	5.72155	6.31647	6.90981	5.84536	31.0812	22.5067	14.5037	18.2245	3.20441	ENSMUSG00000072978	downstream	53818	NA
chr1	78974404	78974766	363	0.736237	NA	-0.774742	0.956385	-1.46272	0.0534608	-2.9737	0.000458064	3.63477	1.71263	1.48496	3.21541	5.57818	5.8248	0	19.0083	15.02	11.0431	6.73036	12.6058	ENSMUSG00000072978	upstream	28608	NA
chr1	79168308	79168939	632	-0.29257	0.943914	0.236275	0.983547	-1.21471	0.000217103	-0.685867	0.115872	11.6911	10.8204	11.9408	8.61853	9.90304	6.69114	11.6981	17.9996	18.8431	22.1997	23.5303	18.618	ENSMUSG00000099706	inside	33289	Gm29536
chr1	79439889	79440175	287	0.109117	0.98939	-0.399882	0.974375	0.369557	0.449861	-0.139441	0.850685	30.3421	17.8707	52.5893	37.2798	37.2009	33.1526	36.563	38.9869	34.9952	28.5998	30.3493	23.9158	ENSMUSG00000050711	upstream	22052	Scg2
chr1	79576932	79577745	814	1.35215	0.00054474	0.413006	0.934118	0.127993	0.754474	-0.81115	0.0323953	8.42873	9.54674	9.71243	21.0306	22.3881	25.1096	26.6617	13.5169	18.8604	19.6984	19.1827	27.706	ENSMUSG00000102235	downstream	19494	NA
chr1	79581175	79581741	567	0.0483159	0.994031	-0.486846	0.905883	0.202292	0.645163	-0.332869	0.502911	42.3518	32.8933	59.2595	25.7318	40.9067	59.0441	61.4103	57.2289	55.6713	35.6861	40.4658	45.5399	ENSMUSG00000102235	downstream	15498	NA
chr1	79641566	79641727	162	-1.16952	0.749837	-2.10297	0.103407	-0.222464	0.836141	-1.15591	0.136887	14.6602	19.1878	26.6193	6.00409	6.81778	13.0519	11.7773	39.1393	51.3695	4.12411	13.7696	16.1407	ENSMUSG00000054702	inside	7962	Ap1s3
chr1	79664984	79665246	263	0.274556	0.975691	-0.128674	0.996879	-0.881178	0.147183	-1.28441	0.0650322	7.02353	19.5015	7.51513	10.3553	24.4974	14.7392	6.34766	23.3995	33.2787	30.4839	23.4255	23.6127	ENSMUSG00000054702	upstream	15295	Ap1s3
chr1	79671114	79672065	952	-0.119307	0.98866	-0.272903	0.986975	0.0441948	0.948701	-0.109401	0.892349	13.3051	6.36704	10.1919	7.15193	7.5411	13.6962	8.51752	10.7739	10.3993	6.11561	8.47996	12.7032	ENSMUSG00000054702	upstream	21425	Ap1s3
chr1	79739715	79740142	428	-0.367327	0.931075	-0.19915	0.990495	-1.15381	0.00197574	-0.985636	0.0275957	21.5793	19.2461	9.23589	13.6355	14.1931	9.05702	13.3733	33.5503	31.8472	29.8819	29.5339	25.201	ENSMUSG00000104497	upstream	292	NA
chr1	79746000	79746608	609	-0.0530507	0.991021	0.0693753	0.996531	0.725317	0.00192101	0.847743	0.00253712	69.7625	69.1611	73.1702	47.595	81.0073	82.7475	62.6576	40.7271	37.9315	40.591	43.4309	39.1791	ENSMUSG00000104497	downstream	3776	NA
chr1	79761222	79761887	666	-0.0694837	0.988927	-0.0831386	0.995219	-0.133528	0.690725	-0.147183	0.723118	53.0938	44.1059	48.832	36.5114	42.8415	65.6121	42.6132	52.922	54.5052	52.7376	53.5898	44.6597	ENSMUSG00000073643	upstream	7362	Wdfy1
chr1	79775921	79776470	550	0.0996045	0.980551	-0.200466	0.979376	0.157723	0.631067	-0.142348	0.736797	39.8225	41.5398	50.3104	39.9676	52.5465	39.7251	55.5033	53.5727	43.8267	40.2599	44.8066	41.5991	ENSMUSG00000073643	upstream	22061	Wdfy1
chr1	79822676	79823744	1069	-0.0304057	0.995667	0.357745	0.956385	1.06701	2.40307e-05	1.45516	1.62164e-06	25.6726	25.7339	37.8185	22.929	27.8961	34.6137	32.126	11.1648	10.6033	12.4103	14.3088	15.5934	ENSMUSG00000026249	inside	15153	Serpine2
chr1	79895060	79895301	242	-0.00612113	0.999528	-1.20403	0.543079	0.0856653	0.920338	-1.11224	0.0739097	20.7182	19.2671	8.90975	23.3118	14.4526	17.4744	8.86949	38.5304	31.4234	17.7478	14.4849	12.1556	ENSMUSG00000067106	downstream	4952	NA
chr1	79999185	79999716	532	0.336508	0.928126	-0.110844	0.995624	0.0649772	0.908066	-0.382375	0.477385	11.4085	12.5622	14.8608	14.2608	16.6087	17.2226	17.9316	15.7743	18.0699	12.9172	17.5707	17.2026	ENSMUSG00000100397	downstream	63411	Gm28071
chr1	80008686	80009150	465	-0.148105	0.989375	0.193625	0.995158	-1.01533	0.0566762	-0.673604	0.356935	14.1873	9.35868	11.9787	4.60185	16.2307	8.33635	12.8221	25.6671	12.0338	15.5994	31.0673	16.8697	ENSMUSG00000099753	upstream	67189	NA
chr1	80010782	80010934	153	-2.94836	NA	-1.62768	0.627666	-2.32475	0.022318	-1.00407	0.293677	12.0731	16.2532	23.4876	1.27145	1.20314	2.30327	4.67629	25.5963	44.0756	11.8525	5.55412	19.2265	ENSMUSG00000099753	upstream	65405	NA
chr1	80018413	80019210	798	0.251808	0.902466	0.0286522	0.996879	0.445833	0.0703189	0.222677	0.547854	40.3432	33.3045	39.1783	39.2478	46.5967	54.3173	39.4496	37.3909	27.1498	34.5654	32.4791	30.719	ENSMUSG00000099753	upstream	57129	NA
chr1	80044761	80045684	924	0.224361	0.966557	0.00861962	0.999855	-0.174875	0.71769	-0.390617	0.454112	11.9947	13.4564	8.55619	10.5267	12.3517	11.823	18.3256	11.7059	17.8574	16.6303	11.9558	16.6255	ENSMUSG00000099753	upstream	30655	NA
chr1	80052770	80053256	487	0.0298129	0.997398	-0.467958	0.973622	-1.10011	0.0188832	-1.59788	0.00213	5.96042	10.2125	6.2722	10.3857	8.31573	2.89446	8.32514	22.21	23.8643	19.2063	18.1036	11.4095	ENSMUSG00000099753	upstream	23083	NA
chr1	80069298	80069572	275	-0.232218	0.975691	-0.574993	0.956385	-0.153447	0.83649	-0.496222	0.482945	12.4745	13.564	20.2548	9.90348	14.057	11.5331	17.3448	23.0566	20.8698	13.5356	13.9055	17.8282	ENSMUSG00000099753	upstream	6767	NA
chr1	80339583	80341289	1707	0.442752	0.712048	0.0941743	0.995158	0.294895	0.283871	-0.0536824	0.912181	32.1546	46.8903	67.7879	59.602	63.409	75.765	68.739	56.5907	45.4732	55.2421	55.9427	51.8901	ENSMUSG00000101722	upstream	19250	NA
chr1	80418414	80418893	480	0.517772	0.890101	0.452361	0.97519	0.420913	0.445818	0.355502	0.642388	12.6445	8.41864	19.8397	23.1007	15.7235	22.025	17.3899	12.4325	8.96751	18.691	16.1547	6.80937	ENSMUSG00000101483	upstream	4756	1700016L21Rik
chr1	80496293	80496668	376	0.209101	0.964504	0.497397	0.926317	0.613399	0.0734615	0.901696	0.0295392	34.3892	24.8012	39.1855	42.4247	34.2702	36.5522	37.4227	17.3592	17.5534	23.0994	29.3807	19.9935	ENSMUSG00000110100	upstream	57128	NA
chr1	80503846	80504924	1079	0.189931	0.969197	0.00706454	0.999855	-1.08098	0.000202458	-1.26384	0.000267741	12.4727	14.4042	7.16056	10.4568	15.013	11.7576	14.3669	22.814	31.5151	23.0869	27.6632	32.1094	ENSMUSG00000110100	upstream	64681	NA
chr1	80519925	80520162	238	-0.00806755	NA	0.470914	0.980915	-1.8651	0.00357286	-1.38612	0.0962209	8.87006	7.18332	3.01983	6.53891	8.5079	8.88404	1.00206	18.8054	13.8657	18.4471	22.762	27.4664	ENSMUSG00000110100	upstream	80760	NA
chr1	80606197	80606534	338	-0.128065	0.982364	0.704944	0.88198	2.03048	2.13254e-09	2.86349	1.00093e-10	69.4843	48.2817	46.7806	36.8346	41.9354	69.8545	53.6251	8.27606	6.79196	12.1422	12.5707	11.6041	ENSMUSG00000103192	downstream	37192	NA
chr1	80618762	80619139	378	-0.290039	0.964252	-0.143721	0.995219	-0.198301	0.753287	-0.0519834	0.954187	25.1318	16.0355	14.7357	18.0123	13.1486	18.6455	10.7258	18.254	19.738	13.3823	14.8936	25.9405	ENSMUSG00000103192	downstream	24587	NA
chr1	80625181	80625765	585	-0.0398017	0.995667	0.588239	0.922148	-0.234243	0.664183	0.393798	0.533836	18.9455	18.5974	8.29292	16.2942	15.7333	13.2527	13.4533	13.7076	9.56535	15.0099	21.9708	14.5267	ENSMUSG00000103192	downstream	17961	NA
chr1	80630357	80630736	380	-0.452669	0.94405	-0.887725	0.858	-0.0730527	0.938177	-0.508108	0.534991	7.63875	11.8611	6.61979	5.63121	6.7819	6.49158	6.90368	14.2319	10.9498	6.53035	6.42926	7.74118	ENSMUSG00000103192	downstream	12990	NA
chr1	80656416	80656815	400	-0.324343	0.951058	-0.0859547	0.996879	-1.35326	0.000347883	-1.11487	0.0132138	11.8748	12.0451	13.476	8.75397	11.0448	11.453	8.9434	27.9731	26.1851	28.3945	26.8212	19.611	ENSMUSG00000103192	upstream	9135	NA
chr1	80710407	80711165	759	0.00692429	0.999119	0.209484	0.983677	-0.502813	0.114167	-0.300253	0.510185	22.5988	20.8866	32.1956	19.4789	32.0139	25.072	24.8231	26.29	35.7283	33.4493	44.0845	29.283	ENSMUSG00000104488	upstream	2026	NA
chr1	80722597	80722877	281	-0.654216	0.857177	0.0463727	0.997135	0.441564	0.50722	1.14215	0.0792796	27.2336	19.3585	18.5435	12.4612	14.412	16.3032	11.8821	12.6095	7.14848	12.907	7.56033	9.30534	ENSMUSG00000102721	downstream	2062	NA
chr1	80732225	80732376	152	-0.401886	0.953689	-0.0485923	0.996961	0.147152	0.863303	0.500445	0.554862	29.5134	26.5852	29.5526	16.6377	25.4321	18.5474	25.1043	18.4033	21.7108	20.7213	25.158	8.60131	ENSMUSG00000038608	inside	3868	Dock10
chr1	80737794	80738323	530	-0.253713	0.969672	-0.311737	0.983547	-0.427375	0.422652	-0.485399	0.438213	9.46	9.38391	13.5608	6.60677	11.8089	6.64906	10.7996	15.482	14.8895	10.985	10.8227	16.0341	ENSMUSG00000038608	upstream	1550	Dock10
chr1	80756946	80758844	1899	-0.0940292	0.978098	0.0226129	0.996879	-0.768953	0.000115009	-0.652311	0.0087384	30.4321	31.919	26.777	30.8343	31.2132	19.485	28.8851	50.4763	42.9912	50.0589	51.5171	39.9311	ENSMUSG00000038608	upstream	20702	Dock10
chr1	80823124	80823802	679	0.0592889	0.995667	-0.196473	0.991958	-1.06563	0.0168188	-1.32139	0.0107515	8.55	10.987	2.91087	8.59496	9.75977	7.26598	5.26857	20.5987	16.9049	14.0565	17.0519	18.292	ENSMUSG00000099949	downstream	51569	NA
chr1	81287137	81287450	314	0.0151596	0.998874	-0.705708	0.937132	0.222216	0.771823	-0.498652	0.526362	12.6059	14.8491	12.0168	10.532	16.4148	13.4675	12.9119	21.9746	15.5361	8.5109	17.9293	6.24554	ENSMUSG00000104029	downstream	210603	NA
chr1	81520957	81521151	195	-0.62561	0.911073	0.609761	0.980153	1.32281	0.0621263	2.55818	0.00195753	33.8313	18.3317	46.0718	8.97843	14.16	41.5652	23.2375	7.65076	3.67898	10.2785	8.7157	5.02846	ENSMUSG00000101986	downstream	10721	Gm6198
chr1	81577631	81577837	207	0.571526	NA	-0.964409	0.870779	-1.2417	0.0868854	-2.77764	0.000325655	1.2748	4.50496	6.94416	9.39771	4.44638	8.51208	4.60851	31.5317	29.8051	10.6048	17.4472	20.5268	ENSMUSG00000101986	upstream	42433	Gm6198
chr1	81593638	81594147	510	-0.444063	0.86134	-0.308939	0.978771	-0.268172	0.547851	-0.133048	0.831849	41.911	28.6462	22.5481	16.7832	23.8221	32.4761	18.7051	33.2752	34.0414	21.3345	30.8254	30.1215	ENSMUSG00000101986	upstream	58440	Gm6198
chr1	81648367	81648813	447	0.0852786	0.994174	-1.1442	0.669619	-0.709227	0.283248	-1.9387	0.00175338	4.72276	3.82468	5.22559	5.65755	5.35356	2.3651	5.33536	20.0255	15.0863	7.25969	9.98065	5.84966	ENSMUSG00000087008	downstream	70887	NA
chr1	81661350	81661551	202	-0.0437818	0.995667	0.0289396	0.998647	-0.550908	0.417889	-0.478187	0.586796	19.5954	9.23293	19.5691	13.4825	9.11288	26.1683	15.3484	22.1569	22.0192	24.5696	26.2927	14.5626	ENSMUSG00000087008	downstream	58149	NA
chr1	81738475	81738610	136	-1.06023	0.681062	0.610622	0.960567	-0.99066	0.084063	0.680193	0.36731	50.4484	33.1412	31.7082	21.4558	18.9494	15.5471	15.7825	13.7123	32.705	31.5806	39.0524	38.4529	ENSMUSG00000087008	upstream	17791	NA
chr1	81740050	81740376	327	-0.315853	0.900682	-0.389056	0.94071	0.305339	0.392092	0.232135	0.615615	60.5239	56.0846	71.9819	39.2635	61.36	40.9517	59.0757	58.1703	49.1431	36.7764	39.3056	48.9775	ENSMUSG00000087008	upstream	19366	NA
chr1	81743278	81743646	369	0.0941095	0.990604	0.464173	0.974808	1.5445	0.000174084	1.91456	0.000184407	40.7626	37.0652	35.5465	33.7401	32.9249	55.3908	40.7179	17.1831	3.49952	11.3808	12.3782	19.487	ENSMUSG00000087008	upstream	22594	NA
chr1	81843787	81844514	728	0.049266	0.992866	-0.0297805	0.996879	-1.03185	3.68806e-05	-1.1109	0.00019047	21.3862	20.7086	23.6941	15.7657	24.78	24.2033	26.5354	55.8437	39.2205	42.7399	47.2749	49.8356	ENSMUSG00000100561	downstream	68126	Gm7516
chr1	81950243	81950596	354	0.0415599	0.995667	0.713189	0.936598	-0.601204	0.311596	0.0704254	0.949489	9.69066	9.65893	12.1817	12.6391	10.4	5.97289	13.474	9.4824	10.5381	14.8288	11.1024	25.8525	ENSMUSG00000103571	upstream	132305	NA
chr1	81967884	81968554	671	0.475565	0.935381	-0.16454	0.995219	-1.05665	0.0397639	-1.69676	0.00385468	2.35962	5.3274	5.35559	6.95795	2.74337	5.77705	9.59649	18.8989	10.2639	12.2327	15.039	11.2035	ENSMUSG00000103571	upstream	114347	NA
chr1	82015367	82015647	281	0.180694	0.98248	0.807509	0.858	-0.285594	0.648113	0.341221	0.672943	23.4772	22.124	14.0675	18.6917	34.0646	10.0327	24.6129	12.6095	18.3818	21.0587	28.7292	33.7318	ENSMUSG00000103571	upstream	67254	NA
chr1	82094974	82095376	403	0.197979	0.986691	-0.827611	0.936598	0.156141	0.87076	-0.86945	0.30089	8.51239	3.47094	8.91712	4.82711	10.9626	4.37221	10.6522	16.6589	8.54473	7.34182	7.11665	6.48834	ENSMUSG00000103571	downstream	10270	NA
chr1	82150783	82151216	434	-0.138554	0.982364	-0.585181	0.858	-0.114292	0.833694	-0.560919	0.240141	35.8737	27.5747	19.0444	15.6881	23.3281	34.9152	26.9264	41.6803	38.6801	21.7717	29.8598	29.3713	ENSMUSG00000098797	downstream	41043	Mir6344
chr1	82189654	82189910	257	0.0257754	0.996169	0.0764927	0.996879	0.609127	0.138133	0.659844	0.19622	54.4197	37.4946	36.3555	28.7636	46.5572	61.7043	38.0471	22.4946	30.7059	30.0815	25.6257	29.2512	ENSMUSG00000022591	upstream	20923	NA
chr1	82283069	82284074	1006	-0.0441095	0.990025	-0.0879638	0.990887	-0.392813	0.0313067	-0.436667	0.0461617	60.0691	60.2527	49.4745	52.984	61.848	49.0418	54.5257	75.2622	77.7303	70.3968	75.9185	69.2038	ENSMUSG00000026142	upstream	10099	Rhbdd1
chr1	82290706	82291864	1159	0.100843	0.973902	-0.104084	0.990735	-0.240604	0.315997	-0.445531	0.0886651	108.377	104.731	103.87	88.6223	133.573	127.095	104.327	148.353	139.395	140.407	156.447	102.652	ENSMUSG00000026142	upstream	2309	Rhbdd1
chr1	82316262	82317023	762	-0.263354	0.866278	-0.170438	0.978918	-0.301824	0.189772	-0.208908	0.5044	72.3777	65.4726	80.1722	49.0161	55.0791	65.6704	73.5503	86.6358	81.3431	78.9101	76.6699	66.9142	ENSMUSG00000104493	upstream	12915	NA
chr1	82358954	82359620	667	-0.444261	0.931075	0.292233	0.990735	1.03726	0.0572015	1.77376	0.00402151	26.5071	10.9517	14.5468	11.0828	8.55545	20.6051	11.0843	8.10814	2.15113	6.29613	5.09614	7.35045	ENSMUSG00000100786	downstream	10594	NA
chr1	82389492	82389702	211	-1.25895	NA	-1.3047	0.744605	-0.354785	0.719473	-0.400541	0.700318	25.0127	19.888	11.9219	2.76587	11.3414	8.35072	9.0423	37.1207	12.92	9.95147	10.5719	9.29431	ENSMUSG00000100786	upstream	9025	NA
chr1	82429192	82429351	160	0.216227	0.976751	-0.300033	0.986975	-0.121756	0.864809	-0.638017	0.326622	26.3884	21.3704	22.46	24.3166	26.4615	33.0375	25.3396	43.1252	29.5928	28.6331	33.1946	24.5137	ENSMUSG00000100786	upstream	48725	NA
chr1	82433450	82433559	110	-0.0219042	NA	0.6815	0.978197	0.728368	0.354699	1.43177	0.118089	43.1811	22.6067	21.2349	35.3696	25.1018	32.0364	19.5129	13.5627	7.82619	11.2797	14.4849	29.7136	ENSMUSG00000100786	upstream	52983	NA
chr1	82449886	82450166	281	0.0916636	0.991868	1.3189	0.708478	1.4131	0.00430642	2.64034	6.17029e-05	36.6245	24.8895	26.2167	20.0763	29.479	53.926	22.9155	5.30924	4.08485	12.5673	6.8043	17.4475	ENSMUSG00000100786	upstream	69419	NA
chr1	82544375	82544602	228	0.336091	0.964368	0.441414	0.978918	0.238699	0.740935	0.344022	0.700188	10.4165	27.9485	15.7614	16.2111	26.6432	20.093	30.3343	14.7227	14.4739	18.8376	24.6921	14.3355	ENSMUSG00000067158	inside	19968	Col4a4
chr1	82554715	82555574	860	-0.13212	0.98981	-0.270516	0.990735	0.602743	0.317478	0.464348	0.560882	16.2626	6.68672	6.05898	9.04803	6.84949	9.42466	9.4287	6.72221	7.00717	4.55022	3.21138	10.6416	ENSMUSG00000067158	inside	8996	Col4a4
chr1	82586767	82587284	518	-0.385203	0.940008	-0.716771	0.920744	1.16765	0.0182097	0.836077	0.177143	22.4149	13.5018	15.2624	10.8908	12.7932	8.16371	19.3371	10.0804	8.86364	5.34337	3.8962	9.46477	ENSMUSG00000079465	inside	22125	Col4a3
chr1	82724751	82725306	556	0.0330951	0.994031	-0.123938	0.990461	-0.111695	0.719524	-0.268728	0.40917	66.4457	75.7537	73.0354	68.9261	87.736	66.5504	69.9172	101.293	72.5143	82.7407	87.4999	65.8403	ENSMUSG00000101450	downstream	6323	NA
chr1	82744134	82744249	116	-1.70586	NA	0.828224	0.973622	-1.06466	0.242201	1.46943	0.138361	31.8481	26.7967	18.5876	5.03102	11.1083	9.1138	6.16786	11.2535	7.42139	12.3418	20.1457	16.906	ENSMUSG00000026149	inside	1933	Tm4sf20
chr1	82787413	82787838	426	0.1866	0.949912	0.111079	0.992806	-0.0269895	0.945808	-0.102511	0.818247	73.0947	82.4534	86.4657	63.9309	102.843	107.54	95.7322	78.3596	94.9799	93.6512	106.223	79.0271	ENSMUSG00000102280	upstream	2224	NA
chr1	82796154	82796282	129	-0.624928	NA	0.173169	0.996879	1.52416	0.0435026	2.32226	0.00847485	42.9579	27.7107	32.036	28.6521	15.6968	30.0496	14.7901	4.33691	8.898	11.838	3.29372	7.60116	ENSMUSG00000100170	upstream	1274	NA
chr1	82798401	82799241	841	0.40104	0.890101	0.111217	0.995219	-0.226306	0.61263	-0.516129	0.28183	11.9234	13.6756	8.54602	17.117	18.3861	12.9898	11.0596	18.1831	14.5016	15.3209	22.1034	14.7685	ENSMUSG00000100170	downstream	303	NA
chr1	82806453	82807143	691	-0.135083	0.980648	-0.0573595	0.996879	-0.538134	0.134861	-0.46041	0.322219	28.2597	23.6168	14.3016	19.7066	24.2421	16.8295	18.2923	30.7663	29.4851	30.9398	35.51	18.4474	ENSMUSG00000100744	upstream	5871	NA
chr1	82831676	82832292	617	-0.331313	0.830362	-0.346982	0.925807	0.337812	0.213158	0.322143	0.339524	62.4426	56.677	74.5512	38.7804	47.7355	58.8286	61.4587	50.1732	53.0202	41.1475	37.8752	43.4387	ENSMUSG00000026159	inside	14472	Agfg1
chr1	82834605	82834872	268	-0.349393	0.926791	0.310749	0.986975	1.64131	2.05719e-05	2.30145	8.51954e-07	75.8175	45.2345	50.2836	43.5521	39.1514	60.4866	36.4855	6.26263	16.0612	13.8892	15.0614	13.4155	ENSMUSG00000026159	inside	17401	Agfg1
chr1	82839227	82840210	984	0.152049	0.956592	0.0730455	0.995219	-0.100067	0.736278	-0.179071	0.595039	30.0356	38.6973	34.5117	42.1092	38.1629	34.3805	38.5366	41.1257	37.3282	36.8583	46.9582	39.5276	ENSMUSG00000026159	inside	22023	Agfg1
chr1	82858386	82858771	386	-0.279912	0.952311	-0.626417	0.858	0.361337	0.442284	0.0148319	0.984584	28.7128	24.5613	22.3436	22.6787	24.7984	17.3461	16.682	29.4708	20.4441	15.0831	19.2632	12.7014	ENSMUSG00000113880	upstream	32275	NA
chr1	82862280	82862399	120	-0.214532	0.98866	0.377265	0.990495	-1.38203	0.0605355	-0.790235	0.450489	19.7913	40.1504	10.4813	24.3166	41.418	8.81001	3.97484	40.4056	41.8484	52.494	77.0114	27.2375	ENSMUSG00000113880	upstream	28647	NA
chr1	82971567	82972580	1014	-0.1785	0.969197	-0.192944	0.987259	-0.141629	0.746265	-0.156073	0.769246	20.8193	15.3275	14.3531	13.4293	10.7108	17.7243	17.875	15.0808	21.9324	17.1309	16.2372	15.1498	ENSMUSG00000113097	upstream	5689	NA
chr1	82987961	82988067	107	-0.573676	NA	0.0768841	0.996879	-0.087315	0.943045	0.563245	0.637584	27.1283	30.5032	33.585	10.9084	44.7297	23.0542	2.22888	22.6573	18.7731	23.1919	22.8329	18.328	ENSMUSG00000100432	upstream	5047	NA
chr1	83006312	83006493	182	-0.0474387	0.995667	0.353738	0.989573	0.0822227	0.92964	0.483399	0.598375	27.5484	19.6411	17.7706	18.1706	18.2057	25.1714	22.2766	22.5424	8.67188	16.2569	14.0074	32.3258	ENSMUSG00000038496	inside	9676	Slc19a3
chr1	83020475	83021103	629	0.396724	0.866532	-0.305302	0.974375	-0.18925	0.646452	-0.891276	0.0148655	19.7179	22.2383	14.283	18.2471	30.1435	28.0127	22.7495	38.2462	31.479	23.9747	33.2684	27.021	ENSMUSG00000100190	upstream	274	NA
chr1	83038087	83038680	594	-0.108114	0.982111	-0.224348	0.978918	-0.0744352	0.86122	-0.19067	0.671296	30.209	24.5952	26.0143	20.3047	30.3701	24.3239	24.09	31.7091	29.469	25.548	27.3604	25.3116	ENSMUSG00000101315	overlapStart	29	Krtap28-13
chr1	83060732	83060955	224	0.305742	0.979184	-0.86406	0.94071	-0.45469	0.619565	-1.62449	0.05399	12.9586	13.183	4.01071	3.4738	24.6536	11.0125	9.58221	43.2917	18.5756	20.4522	12.8036	17.5098	ENSMUSG00000099691	downstream	15538	NA
chr1	83076289	83076398	110	-0.217697	NA	-0.258568	0.995158	0.269747	0.791263	0.228875	0.858852	28.7874	22.6067	21.2349	22.9902	6.69382	32.0364	23.8491	27.1254	14.348	17.3534	14.4849	20.7995	ENSMUSG00000026166	upstream	18089	Ccl20
chr1	83101884	83102210	327	-0.297737	0.969033	-0.108703	0.996879	-1.18907	0.0139685	-1.00004	0.0935148	22.5956	14.2588	6.59376	10.1133	15.7622	6.46606	12.3986	27.9446	28.5205	26.2689	30.2101	20.9904	ENSMUSG00000026166	downstream	4996	Ccl20
chr1	83137824	83138341	518	-0.233855	0.984078	-1.07194	0.822017	-0.238366	0.800095	-1.07645	0.177376	9.67915	6.00081	3.12185	6.00873	2.48757	6.80309	5.98529	15.1206	10.8026	3.31657	5.74176	10.7267	ENSMUSG00000053161	inside	351	Daw1
chr1	83153062	83153387	326	-0.562871	0.758906	-0.277652	0.978771	-0.602651	0.0908978	-0.317433	0.515308	33.9974	35.2796	33.0699	19.692	27.1038	28.1055	18.2892	45.1917	40.0512	30.1555	39.4262	36.0939	ENSMUSG00000053161	inside	15589	Daw1
chr1	83159235	83160066	832	-0.230227	0.940885	-0.054194	0.996879	-0.336951	0.292847	-0.160918	0.731003	29.8138	23.3505	18.3567	16.3669	21.4613	24.5664	18.9187	29.3628	23.6259	25.5816	25.5343	25.1423	ENSMUSG00000053161	inside	21762	Daw1
chr1	83408058	83408377	320	-0.0691563	0.994522	0.819636	0.929794	1.11691	0.0412414	2.0057	0.00176138	38.758	19.4276	57.273	30.3957	22.4348	49.5563	45.4623	8.74159	10.3126	7.15827	15.2695	31.6636	ENSMUSG00000104219	upstream	2939	NA
chr1	83451040	83451620	581	-0.0155042	0.998874	-0.00187543	0.99991	0.784871	0.0959975	0.7985	0.175875	23.6179	15.7829	19.7926	22.4332	18.3763	28.5074	9.03063	10.9132	11.6068	7.55664	10.0555	18.0021	ENSMUSG00000104219	upstream	45921	NA
chr1	83954371	83954913	543	-0.0429054	0.995667	-0.210703	0.990887	-0.418083	0.428402	-0.585881	0.334594	14.0933	7.15566	21.5087	13.2554	16.2723	8.43684	16.2507	23.3538	19.2892	22.3229	17.9972	13.8445	ENSMUSG00000077736	downstream	54609	Gm24555
chr1	83959737	83960125	389	-0.134208	0.98866	0.507164	0.974375	0.959493	0.0461448	1.60087	0.00431905	25.7779	15.9816	44.8045	27.5046	23.1875	31.707	23.2973	11.0262	8.11456	17.911	14.4725	5.88162	ENSMUSG00000077736	downstream	59975	Gm24555
chr1	84075051	84075238	188	0.130165	NA	-0.88778	0.956385	0.330081	0.760314	-0.687864	0.544108	14.0364	8.26707	16.2477	14.4865	3.9166	29.9915	10.1485	14.8793	25.9485	16.2457	5.08512	12.1699	ENSMUSG00000102750	downstream	35350	NA
chr1	84106901	84107007	107	-0.405431	NA	-0.700162	0.978197	0.628834	0.516425	0.334103	0.795172	34.5269	31.9557	11.7548	19.9987	13.763	9.88038	33.4333	20.9145	20.114	8.02797	11.9128	21.3827	ENSMUSG00000102750	downstream	3581	NA
chr1	84218715	84218821	107	-0.494148	NA	-1.06715	0.905883	0.731873	0.42177	0.158874	0.906771	24.6621	14.5253	38.6228	19.9987	17.2037	26.3477	11.1444	19.1716	26.8187	13.3799	7.94188	12.2187	ENSMUSG00000098851	upstream	22033	Mir6353
chr1	84225712	84225972	261	0.533517	0.857177	0.394302	0.976312	0.385786	0.423307	0.246571	0.73189	26.2873	19.0554	19.276	27.5774	36.675	36.4552	22.8439	16.4337	19.2406	24.5009	22.3841	23.7937	ENSMUSG00000098851	upstream	29030	Mir6353
chr1	84247056	84247217	162	-0.52446	NA	-0.45695	0.983677	-0.501168	0.570595	-0.433658	0.687508	26.0626	19.1878	11.0914	10.8074	19.317	6.52593	13.2495	34.5347	15.9422	27.6904	14.4253	10.088	ENSMUSG00000098851	upstream	50374	Mir6353
chr1	84284354	84284885	532	0.143666	0.97077	-0.106614	0.995158	0.278723	0.389452	0.0284429	0.959863	28.7693	40.6081	33.7744	40.9542	35.2936	45.706	32.2769	30.8475	36.9488	34.087	28.752	31.9477	ENSMUSG00000045658	inside	57016	Pid1
chr1	84286585	84287157	573	-0.505669	0.758906	-0.037679	0.996879	1.38824	5.83865e-06	1.85623	1.71938e-07	47.4347	37.4312	46.0959	23.0859	30.8406	38.7456	31.2161	15.622	8.76406	13.3255	10.9374	10.2675	ENSMUSG00000045658	inside	54744	Pid1
chr1	84299790	84300356	567	0.375448	0.889945	-0.225721	0.983547	-0.128577	0.777906	-0.729747	0.062781	14.8929	13.9797	16.4786	17.4976	21.752	14.2949	23.9752	25.3254	24.799	20.368	21.3569	23.0582	ENSMUSG00000045658	inside	41545	Pid1
chr1	84302545	84303169	625	0.135504	0.97802	-0.0867543	0.99616	-0.355859	0.306464	-0.578117	0.135667	19.4219	22.1319	14.6619	17.7414	21.206	22.5536	21.3688	23.8704	31.91	25.9607	23.454	30.8546	ENSMUSG00000045658	inside	38732	Pid1
chr1	84321199	84321715	517	0.286652	0.967519	0.912724	0.846793	0.916984	0.0728964	1.54306	0.0129295	21.9478	12.0248	13.9017	15.0509	17.0906	27.265	18.4519	4.32852	6.38307	7.75364	5.75287	19.5984	ENSMUSG00000045658	inside	20186	Pid1
chr1	84359774	84360516	743	0.016711	0.998774	0.0148581	0.999833	0.0449101	0.936566	0.0430572	0.952647	26.637	25.7292	36.5164	19.1129	27.5005	35.0977	39.16	18.8244	38.4287	24.9207	25.8766	37.8319	ENSMUSG00000104396	downstream	9708	NA
chr1	84406977	84407242	266	0.180147	0.97301	-0.0714299	0.996879	1.1251	0.00129062	0.873524	0.0555342	33.7296	35.6416	52.6881	39.4916	42.9059	63.591	42.1393	23.1356	21.576	21.1698	20.7653	22.1177	ENSMUSG00000104396	upstream	33857	NA
chr1	84417393	84417873	481	0.225596	0.97444	-0.761367	0.827543	-0.0534571	0.942042	-1.04042	0.056414	13.1668	11.3092	6.72399	6.47094	14.5427	12.4549	14.8747	25.201	17.3011	13.8899	11.7044	11.5519	ENSMUSG00000104396	upstream	44273	NA
chr1	84449478	84450316	839	0.396993	0.758906	0.121582	0.990735	-0.0717771	0.838299	-0.347188	0.294823	35.2265	27.4163	26.1275	32.9245	40.151	47.4627	35.2477	41.5651	33.3476	40.4981	43.0461	37.7884	ENSMUSG00000104396	upstream	76358	NA
chr1	84507213	84507322	110	-0.0606492	NA	-0.191594	0.996879	1.06374	0.212198	0.932798	0.396608	23.9895	24.0196	29.4022	17.6848	8.36728	22.4255	52.0343	16.9534	10.4349	13.8827	11.5879	8.91409	ENSMUSG00000104396	upstream	134093	NA
chr1	84619307	84619611	305	-0.295796	0.966557	-0.500451	0.978199	1.89179	9.24712e-05	1.68713	0.00361783	36.3382	38.2183	57.1441	17.8587	31.9877	57.7705	38.3149	20.7887	7.0564	11.5784	10.4481	5.3582	ENSMUSG00000102481	downstream	23299	NA
chr1	84798409	84798518	110	-0.35251	NA	0.181776	0.99616	-0.587988	0.452639	-0.0537029	0.967726	28.7874	39.5617	14.7011	17.6848	23.4284	22.4255	23.8491	22.0394	35.2179	30.3684	48.283	14.8568	ENSMUSG00000104503	inside	720	NA
chr1	84838342	84840377	2036	0.0402938	0.990987	-0.0619338	0.995219	0.100627	0.680571	-0.00160093	0.996344	34.8649	38.4736	40.5074	34.0145	34.8993	45.1751	43.1064	37.5539	38.548	38.0181	34.9032	36.4415	ENSMUSG00000026219	upstream	20105	Trip12
chr1	84852449	84852625	177	-0.45815	NA	0.176743	0.996879	1.31467	0.0894208	1.94956	0.0298617	47.7079	11.4151	21.318	27.4764	21.84	17.9187	8.08443	5.268	8.10623	7.00998	9.60204	5.53983	ENSMUSG00000026219	upstream	34212	Trip12
chr1	84881332	84882160	829	-0.302253	0.901237	0.139651	0.992281	1.19511	9.11403e-06	1.63702	2.09379e-07	58.8885	50.4321	67.8406	39.1881	36.6384	63.7636	53.5094	24.9699	13.3269	20.8387	20.3732	21.6849	ENSMUSG00000026220	downstream	1459	Slc16a14
chr1	84934560	84935177	618	-0.606558	0.857177	0.0610015	0.996879	-0.213168	0.750363	0.454392	0.521932	17.0799	13.832	15.1187	11.0172	8.63806	13.6854	7.33224	11.1651	11.1441	8.03085	7.21901	22.2131	ENSMUSG00000118590	upstream	1526	NA
chr1	84935846	84935952	107	0.481435	NA	-0.216765	0.99616	-0.227628	0.837174	-0.925827	0.393852	17.2635	11.6203	6.71701	19.9987	18.9241	13.1738	11.1444	29.6288	14.7503	15.1639	18.862	24.4374	ENSMUSG00000118590	upstream	751	NA
chr1	85105462	85105590	129	0.611066	0.929921	-0.504143	0.982515	0.388963	0.657402	-0.726246	0.457791	22.5018	20.4818	12.5358	19.6041	41.3823	32.7814	18.4876	26.0215	34.4797	11.838	13.9983	45.607	ENSMUSG00000090128	downstream	10504	NA
chr1	85111652	85112254	603	-0.0954037	0.991021	0.3169	0.983547	-0.318242	0.557999	0.0940616	0.912578	23.6314	17.5267	10.7272	17.7434	16.4848	18.1168	11.8652	16.3911	15.7043	15.0367	13.3879	34.1485	ENSMUSG00000090128	downstream	16694	NA
chr1	85239976	85240328	353	-0.222349	0.985118	0.347507	0.990735	0.122713	0.907737	0.692569	0.497243	22.4264	14.9697	14.2522	20.9412	6.77915	22.9609	8.78294	8.45268	12.6002	6.21871	6.01828	31.4813	ENSMUSG00000079455	upstream	4091	NA
chr1	85258625	85258911	287	-0.109999	0.992375	-0.0295957	0.998714	0.377315	0.645165	0.457719	0.646442	28.5032	14.6215	16.9037	14.9119	13.4693	38.0641	9.14076	16.8943	11.9983	9.97668	8.1425	27.3324	ENSMUSG00000052477	upstream	10338	C130026I21Rik
chr1	85598329	85598884	556	0.0595501	0.992375	-0.0220635	0.998184	-0.249594	0.545074	-0.331207	0.499188	28.4767	32.7055	15.8351	32.1888	22.1823	29.7892	23.1628	28.5097	35.8701	35.5339	29.4214	29.9808	ENSMUSG00000090246	upstream	20023	NA
chr1	85600599	85601265	667	0.0971809	0.985118	0.126554	0.993214	-0.21149	0.571382	-0.182117	0.710521	46.2885	44.7389	22.359	45.2062	37.5336	47.0219	31.8226	39.7019	45.6039	47.221	50.6429	41.1625	ENSMUSG00000090246	upstream	22293	NA
chr1	85629737	85629880	144	-0.0656963	0.995667	0.199338	0.995219	0.290712	0.705029	0.555747	0.520595	60.4735	21.5862	19.9644	25.6675	23.01	48.9445	31.4675	20.7208	23.9134	24.5237	25.818	27.2375	ENSMUSG00000098634	upstream	49789	Mir8096
chr1	85649920	85650362	443	-0.332862	0.965663	-0.106962	0.996879	0.00443277	0.996261	0.230333	0.804631	26.8054	16.1385	11.3568	14.4911	11.2193	27.842	4.84518	15.5757	14.8986	13.5732	16.5448	11.805	ENSMUSG00000098634	upstream	29307	Mir8096
chr1	85692358	85692674	317	-0.718135	0.765455	-0.97481	0.670597	0.266969	0.66501	0.010293	0.990862	32.4652	25.0046	31.7416	11.6597	14.5174	18.8984	27.8364	24.1198	34.399	11.1401	14.4087	21.6525	ENSMUSG00000100217	upstream	10318	9930111H07Rik
chr1	85703330	85704127	798	-0.373429	0.801671	-0.298612	0.956385	-0.654189	0.00637896	-0.579371	0.0507891	44.9727	60.5713	46.6087	26.5715	44.2899	37.0948	49.312	75.7166	76.4149	63.2703	57.2377	65.5338	ENSMUSG00000100217	inside	338	9930111H07Rik
chr1	85735794	85736762	969	0.0463972	0.992939	-0.156698	0.989573	-0.0912662	0.821999	-0.294361	0.467296	18.5182	14.4354	19.0991	18.4696	15.1975	18.1837	19.6896	21.1699	21.1741	15.858	19.2933	22.9368	ENSMUSG00000036707	inside	14632	Cab39
chr1	85751322	85751901	580	-0.342444	0.90908	0.435343	0.967168	1.56821	1.52189e-06	2.346	1.91005e-09	64.6061	34.8357	54.5236	32.1985	33.0075	52.86	44.4086	13.1827	7.17401	15.1393	10.4391	15.779	ENSMUSG00000036707	inside	27396	Cab39
chr1	85775121	85775298	178	-0.599137	NA	-1.02256	0.956385	1.95525	0.0201672	1.53183	0.117451	42.9924	12.2241	16.151	16.3932	8.27326	21.7775	16.078	11.5245	4.83641	4.2896	1.79027	7.34494	ENSMUSG00000026223	upstream	46704	Itm2c
chr1	85793228	85794476	1249	0.190171	0.93262	0.16679	0.982515	-0.0649788	0.838716	-0.08836	0.821876	25.7757	28.3715	33.2315	35.5112	27.8552	36.9611	33.6064	33.8932	28.3744	38.208	31.9773	34.2813	ENSMUSG00000026223	upstream	27526	Itm2c
chr1	85853390	85853581	192	-0.159271	0.985118	-0.0552038	0.996879	0.553805	0.329209	0.657871	0.335304	42.6063	21.0466	44.92	38.5012	26.845	40.3792	23.6006	26.2248	19.4296	17.8957	18.8103	32.3445	ENSMUSG00000026224	upstream	2623	4933407L21Rik
chr1	85894366	85895742	1377	-0.126194	0.969197	-0.0839111	0.995158	-0.400923	0.0747676	-0.35864	0.210906	33.5365	38.4884	29.229	26.418	34.49	30.7103	32.2144	43.7439	42.9294	38.3992	35.4075	50.3211	ENSMUSG00000049608	upstream	5637	Gpr55
chr1	85898369	85898610	242	-0.466063	0.90908	-1.09805	0.502319	-0.264981	0.665546	-0.896972	0.104651	39.2555	66.1502	23.0169	19.2925	38.7937	29.124	37.4489	90.1612	70.5543	48.1162	40.3821	20.2593	ENSMUSG00000049608	upstream	9640	Gpr55
chr1	86018329	86018584	256	0.229859	NA	0.80548	0.974375	-0.379736	0.719152	0.195884	0.900066	10.308	4.24979	12.6338	5.31925	8.62875	19.2719	10.2476	10.1985	5.6047	6.71088	7.05384	30.6422	ENSMUSG00000077274	downstream	3185	Gm22786
chr1	86059413	86059793	381	-0.358034	0.887716	0.0241649	0.997773	-0.0658882	0.892594	0.31631	0.500641	56.794	52.6228	54.7057	28.5927	38.1688	49.9465	55.7104	42.0942	45.5672	56.6148	40.4259	34.315	ENSMUSG00000094638	upstream	1566	NA
chr1	86064265	86065058	794	0.400224	0.816011	0.0521275	0.996879	0.219458	0.523707	-0.128638	0.793109	28.9143	30.9276	49.3328	52.6757	33.153	59.9169	48.3589	41.807	38.1289	41.8317	40.1345	42.3999	ENSMUSG00000094638	inside	2906	NA
chr1	86111707	86112070	364	-0.0973725	0.992375	-0.437778	0.989573	2.78578	3.63193e-06	2.44538	0.000656246	24.6485	16.2253	19.2514	17.6362	14.16	22.267	20.9662	5.12327	2.36506	1.57325	1.16728	8.08145	ENSMUSG00000062590	inside	29205	Armc9
chr1	86154189	86155035	847	-0.13771	0.95687	-0.0475682	0.996879	-0.212035	0.35555	-0.121893	0.707184	66.3605	76.3343	63.0047	62.7006	59.7663	69.4815	58.5668	71.7767	77.5843	82.823	71.7347	60.199	ENSMUSG00000062590	inside	50971	Armc9
chr1	86178928	86179208	281	0.469507	0.887536	-0.306757	0.983547	0.639947	0.141987	-0.136317	0.858774	24.4163	17.1461	27.4955	38.7681	29.479	28.8441	28.8565	31.8555	18.8924	18.6811	19.2788	24.4265	ENSMUSG00000087538	downstream	24023	NA
chr1	86358669	86360096	1428	0.161137	0.905895	0.0970756	0.988592	0.193981	0.266914	0.129919	0.595668	72.6236	90.6622	84.3036	96.1765	90.1064	90.5678	93.1917	76.6583	74.6539	82.945	83.8325	75.0748	ENSMUSG00000036574	downstream	2895	Tex44
chr1	86434000	86435811	1812	0.180013	0.931075	0.100725	0.990735	0.08819	0.755311	0.00890229	0.983054	38.1554	47.6899	45.0192	62.2676	47.4423	40.4521	47.2506	42.4022	44.501	50.5662	47.1319	41.4876	ENSMUSG00000026238	upstream	18637	Ptma
chr1	86440579	86440846	268	0.367534	0.874848	0.207931	0.984849	0.079457	0.860674	-0.0801462	0.892493	39.3857	56.2531	54.3063	87.1042	59.7573	52.5971	58.7328	51.4927	55.1435	54.4883	65.7946	65.8578	ENSMUSG00000026238	upstream	13602	Ptma
chr1	86441751	86443092	1342	0.0619789	0.985118	0.19155	0.973622	-0.301649	0.121914	-0.172078	0.543527	35.3943	38.4499	32.4013	40.4431	32.5089	36.7631	38.386	39.3263	40.5209	44.6636	46.225	46.0318	ENSMUSG00000026238	upstream	11356	Ptma
chr1	86447648	86448644	997	0.153403	0.95513	-0.021072	0.996879	-0.100356	0.732148	-0.274831	0.359857	35.7316	28.3717	33.3408	39.8041	35.2651	33.5788	34.6852	42.0859	36.2658	34.9417	41.5515	39.34	ENSMUSG00000026238	upstream	5804	Ptma
chr1	86470426	86471153	728	-0.127191	0.967337	-0.0972142	0.992342	0.0691917	0.826298	0.099169	0.790946	72.1332	88.5985	105.142	84.1728	76.6158	68.7374	95.3307	72.4943	93.2227	77.8757	76.1651	79.0187	ENSMUSG00000026238	downstream	11992	Ptma
chr1	86472216	86472844	629	-0.253389	0.952037	0.576039	0.846793	-0.473902	0.205269	0.355526	0.487357	33.1428	38.5464	21.1388	36.1849	27.5096	16.2474	22.3703	23.7186	24.6357	28.3751	36.9837	44.1689	ENSMUSG00000026238	downstream	13782	Ptma
chr1	86487145	86487980	836	0.455344	0.716993	0.17749	0.983677	0.346575	0.207739	0.0687208	0.888241	35.6686	47.2212	65.768	85.1662	64.5161	65.7589	57.3405	46.3987	48.5705	51.946	59.3373	49.2621	ENSMUSG00000102927	upstream	19800	NA
chr1	86501642	86501883	242	-0.115241	0.982364	0.151475	0.990735	-0.411371	0.21304	-0.144654	0.780663	40.3459	66.7925	52.716	49.0351	48.6823	45.1422	56.1734	60.8781	58.6964	69.8079	64.9626	63.4791	ENSMUSG00000102927	upstream	5897	NA
chr1	86503911	86504635	725	-0.0422983	0.991416	0.194358	0.978743	-0.40231	0.0684022	-0.165654	0.629892	62.6043	93.0382	69.8893	83.4478	79.4718	66.5915	62.8299	82.5688	86.8797	103.606	99.776	86.108	ENSMUSG00000102927	upstream	3145	NA
chr1	86516097	86516346	250	-0.322623	0.968077	-0.282174	0.989573	-1.25354	0.0147284	-1.21309	0.0450732	23.2218	17.4071	7.1872	10.8938	16.199	15.5056	7.6317	26.1082	45.9137	26.3424	31.017	32.685	ENSMUSG00000026240	inside	5471	Cops7b
chr1	86525297	86525525	229	0.296103	0.90908	0.272654	0.977577	0.292001	0.392917	0.268552	0.555109	73.7493	80.7646	72.1859	123.176	74.7574	81.5599	90.6056	68.4058	57.6427	75.0212	87.6684	61.3736	ENSMUSG00000026240	inside	11572	Cops7b
chr1	86525989	86527020	1032	0.272913	0.861363	0.243298	0.968464	0.0922285	0.763832	0.0626133	0.881818	52.9303	73.1924	75.0408	101.036	75.8082	68.9776	78.5725	64.6923	64.2324	74.3572	87.7983	65.56	ENSMUSG00000026240	inside	10077	Cops7b
chr1	86532448	86532772	325	0.089544	0.990025	0.116987	0.99616	0.308602	0.507706	0.336045	0.566583	30.0422	42.5614	30.4074	54.4691	27.1872	39.0351	26.4174	24.0999	30.462	29.6609	32.357	26.148	ENSMUSG00000026240	inside	4325	Cops7b
chr1	86557796	86558108	313	-0.198244	0.970331	0.373966	0.974375	0.149061	0.772933	0.721271	0.12321	29.5078	42.7035	40.184	41.6412	37.0513	27.0211	24.3824	21.449	24.2954	32.3228	32.5795	21.9292	ENSMUSG00000103609	upstream	7815	NA
chr1	86582190	86583081	892	0.0274183	0.995667	0.158562	0.983547	-0.300359	0.217332	-0.169216	0.633675	68.9294	79.6271	51.9702	75.0215	81.3089	57.6799	57.2164	76.9364	73.5095	87.4186	84.6685	79.1475	ENSMUSG00000026241	downstream	10932	Nppc
chr1	86669552	86669955	404	-0.631939	0.751571	0.0433185	0.996879	-0.248302	0.617939	0.426956	0.432267	29.393	31.1611	37.3592	26.0019	15.4919	22.6792	20.6613	29.0809	19.8883	17.9547	23.9264	36.4066	ENSMUSG00000100225	downstream	22711	NA
chr1	86670405	86670728	324	0.0156744	0.998874	0.265281	0.987362	-0.187682	0.752716	0.0619249	0.943112	28.506	29.741	22.7373	20.4139	21.5896	31.542	36.8041	26.4766	25.2419	28.2796	18.6873	50.4398	ENSMUSG00000100225	downstream	21938	NA
chr1	86703647	86704203	557	-0.100263	0.985118	-0.0214707	0.997773	-0.000169783	0.999781	0.0786226	0.887977	23.688	30.1355	36.1296	30.0356	28.7522	29.1031	24.8339	34.1503	23.4411	26.5597	28.6057	29.927	ENSMUSG00000100768	inside	47	NA
chr1	86834252	86835004	753	0.250159	0.959092	0.282054	0.978918	-0.436181	0.26528	-0.404287	0.433776	14.7186	13.4162	7.87442	15.2423	14.9122	15.4438	11.0852	13.8689	17.5301	17.1114	16.9279	24.7416	ENSMUSG00000084106	downstream	1511	Gm6136
chr1	86955985	86956237	253	0.124817	NA	0.663505	0.976312	1.01291	0.130718	1.5516	0.0660467	14.6023	15.3578	9.23257	13.8403	19.6449	11.1431	11.3118	3.68552	5.10404	5.65871	8.8169	6.45948	ENSMUSG00000103984	upstream	8208	NA
chr1	87010876	87011163	288	-1.23446	0.57846	-0.283825	0.990735	-0.193797	0.824774	0.75684	0.323168	23.8229	21.0466	19.9644	11.4828	7.03084	11.0125	7.45283	13.598	11.9567	9.94204	5.1636	19.2932	ENSMUSG00000101625	inside	2983	NA
chr1	87035665	87036270	606	0.0945183	0.990025	-0.161378	0.993367	0.210698	0.68104	-0.0451987	0.954262	19.5954	20.2611	16.0111	27.9279	20.3521	13.9564	16.1355	26.4652	12.3118	17.3247	16.1262	18.3381	ENSMUSG00000079440	upstream	6337	Alpi
chr1	87142564	87142737	174	-1.11755	NA	0.996524	0.956385	0.866842	0.270626	2.98091	0.000609013	31.8481	22.3306	34.0772	10.062	15.869	16.2023	12.3357	3.2153	4.12299	4.38821	7.3257	13.1491	ENSMUSG00000026254	inside	928	Eif4e2
chr1	87180953	87181188	236	-1.12446	0.632484	-0.713039	0.94547	0.0750566	0.935979	0.486476	0.559856	31.3083	27.6597	47.9654	14.8372	7.02	20.9051	24.2533	29.2374	21.8868	12.5371	9.00192	29.0841	ENSMUSG00000088318	downstream	1983	Gm26187
chr1	87186970	87187262	293	-0.0585638	0.994174	0.236103	0.990735	0.252578	0.658583	0.547245	0.379695	32.4226	20.6874	21.4635	32.5328	22.6174	18.041	19.5351	15.2754	18.1187	17.2645	23.5647	17.8485	ENSMUSG00000026255	upstream	4823	Efhd1
chr1	87213312	87214650	1339	-0.035826	0.992829	0.200837	0.974375	-0.0571539	0.853218	0.179509	0.576363	39.4151	47.7058	53.5417	55.7883	39.4556	43.1618	44.884	42.6177	40.5045	52.0342	44.5833	46.379	ENSMUSG00000089821	upstream	20416	NA
chr1	87258500	87258930	431	-0.35955	0.947881	0.416327	0.978771	-0.257748	0.684356	0.518128	0.458089	18.9801	18.0303	10.8392	11.7351	13.2401	12.2645	12.1735	8.6537	13.316	9.30077	14.5409	22.7506	ENSMUSG00000048000	inside	3780	Gigyf2
chr1	87270648	87271545	898	-0.234722	0.95886	0.662612	0.836332	1.26604	0.000121272	2.16338	4.25116e-08	30.8551	26.1343	33.4149	31.1945	15.3742	34.9261	21.7775	8.30678	5.27266	11.0536	8.16187	13.4671	ENSMUSG00000119117	upstream	1365	NA
chr1	87326616	87327666	1051	0.263047	0.879294	-0.00841073	0.999855	0.223749	0.397889	-0.0477086	0.915341	40.4237	47.3213	66.3329	51.6409	60.2508	66.0541	70.1176	52.3442	54.1976	49.7651	52.0501	57.844	ENSMUSG00000079436	upstream	4165	Kcnj13
chr1	87510169	87510763	595	0.145622	0.98248	-0.327049	0.978918	0.305271	0.539344	-0.167401	0.811337	21.7316	16.1951	19.6289	19.2898	13.3033	36.7207	17.2355	19.1189	23.632	17.9659	12.8538	21.4238	ENSMUSG00000026259	upstream	8577	Ngef
chr1	87520489	87520932	444	0.0322699	0.995667	0.225024	0.989573	-0.354799	0.458169	-0.162044	0.82055	25.5564	14.3519	12.5452	21.9068	13.6816	15.8739	18.2628	20.5808	17.7734	25.7956	19.6177	21.3483	ENSMUSG00000026259	upstream	18897	Ngef
chr1	87521577	87521825	249	-0.198642	0.979184	0.107667	0.996879	-0.525479	0.328688	-0.21917	0.785682	22.2553	26.2156	25.2562	12.5001	24.3962	24.0595	25.8604	26.2131	31.1162	25.2983	21.3298	51.1934	ENSMUSG00000026259	upstream	19985	Ngef
chr1	87551126	87551299	174	-0.144641	0.990025	0.543914	0.978771	0.332506	0.671216	1.02106	0.201825	24.2652	18.7577	41.3058	17.8881	17.9848	24.3035	42.4897	18.22	9.89519	13.1646	24.419	24.4198	ENSMUSG00000026288	inside	3092	Inpp5d
chr1	87607867	87608093	227	-1.62419	0.471328	-1.03842	0.823121	-1.4796	0.0315899	-0.893835	0.264326	19.7623	19.8555	16.6224	9.42669	4.05463	0	9.45558	32.8612	36.6601	7.56822	18.7176	27.3575	ENSMUSG00000026288	inside	40136	Inpp5d
chr1	87721535	87721666	132	0.183154	0.98866	-0.903222	0.926317	0.554571	0.494531	-0.531805	0.591248	9.99561	23.5486	31.3079	17.6848	19.5236	16.0182	46.9754	32.494	31.5222	11.5689	17.7038	24.7614	ENSMUSG00000089281	downstream	8993	Scarna6
chr1	87755782	87756434	653	0.0434937	0.992375	-0.173334	0.983547	0.0201122	0.959576	-0.196716	0.60218	58.596	46.8881	55.3073	48.8566	53.2789	71.7752	48.2094	61.1153	61.3032	61.5341	57.2594	41.5445	ENSMUSG00000056055	inside	16446	Sag
chr1	87792729	87793191	463	-0.723407	0.792437	-0.487624	0.965686	-0.497465	0.365565	-0.261681	0.718931	15.3885	14.4343	10.4781	5.8822	7.55404	12.9391	7.21138	16.9168	15.1847	12.5746	9.86517	12.001	ENSMUSG00000103996	overlapStart	66	NA
chr1	87852913	87854217	1305	0.0621449	0.988261	-0.0492779	0.996879	0.0394092	0.903143	-0.0720137	0.851927	31.1404	33.1088	36.7621	42.6332	29.9042	35.6451	32.7125	35.2968	35.6227	36.7878	33.2912	32.3093	ENSMUSG00000103591	downstream	24659	NA
chr1	87879519	87880146	628	0.107183	0.98345	-0.156811	0.989596	-0.458621	0.133273	-0.722616	0.0340084	28.5734	35.3904	20.8864	32.2156	38.1058	23.007	27.3429	47.2157	46.3797	48.0258	40.7638	35.9119	ENSMUSG00000103591	downstream	51265	NA
chr1	88007880	88008671	792	-0.126495	0.970882	-0.34209	0.905883	-0.146007	0.645451	-0.361602	0.253199	30.9864	27.2772	26.7705	26.2816	28.1233	24.4722	24.09	39.5579	33.1526	30.6094	28.4333	25.9994	ENSMUSG00000089675	upstream	6864	NA
chr1	88094314	88095221	908	-0.285213	0.936444	-0.490321	0.930163	0.711207	0.0463334	0.506099	0.277206	24.9934	21.9096	11.2795	14.997	16.0158	17.4648	14.9713	12.5283	14.5376	9.35516	8.42294	11.8789	ENSMUSG00000089943	inside	580	Ugt1a5
chr1	88134522	88134805	284	0.181444	0.976751	0.102555	0.996739	-0.0987068	0.871365	-0.177596	0.804557	25.0876	25.7211	16.4496	31.5088	19.4451	27.2986	23.5132	30.2057	20.7137	25.5412	28.4258	27.6211	ENSMUSG00000081984	upstream	1018	Dnajb3
chr1	88158580	88158693	114	-0.408697	NA	-0.958024	0.9599	1.82119	0.0261545	1.27186	0.189454	27.7773	25.9035	22.066	18.7707	20.9916	21.6386	14.6442	6.54341	13.8446	5.86057	4.65889	5.73421	ENSMUSG00000079429	inside	3872	Mroh2a
chr1	88205566	88205683	118	-1.19373	NA	0.200124	0.996879	-0.696723	0.507216	0.697133	0.56813	26.8357	13.1713	16.7498	9.89149	7.8	5.97289	8.08443	7.902	14.5912	10.515	15.3033	13.8496	ENSMUSG00000036251	inside	183	Trpm8
chr1	88276787	88277975	1189	-0.00359466	0.999513	-0.256749	0.916073	-0.083423	0.732638	-0.336578	0.138361	310.047	276.594	329.287	239.035	307.626	352.993	319.726	422.38	348.745	333.772	309.198	324.926	ENSMUSG00000085420	inside	1576	NA
chr1	88474472	88475065	594	-0.430871	0.866532	0.00201289	0.99987	0.641251	0.0886086	1.07413	0.00976781	52.8657	41.8642	47.4912	42.902	17.3544	43.9017	37.3394	24.4882	20.5317	19.1209	18.0614	32.4649	ENSMUSG00000100798	upstream	4174	Gm19589
chr1	88482605	88482970	366	-0.614844	0.886899	0.39878	0.989573	1.2613	0.0324856	2.27492	0.000923781	24.5138	14.0134	16.6916	14.8823	8.04722	15.4055	9.77421	3.5667	3.92022	4.95472	3.19248	8.03729	ENSMUSG00000100798	inside	3366	Gm19589
chr1	88526060	88526600	541	-0.424749	0.839239	-0.261306	0.978771	-0.187845	0.653901	-0.0244012	0.969896	39.9972	28.1539	42.5121	24.4514	25.5194	19.5416	39.2341	37.5732	37.1298	32.9907	26.3102	35.0412	ENSMUSG00000100798	downstream	36171	Gm19589
chr1	88575923	88576218	296	0.189113	0.984078	-1.02974	0.715956	0.352852	0.601812	-0.866001	0.186552	13.3725	13.1268	12.1405	17.7445	15.5473	5.95271	17.7257	27.7211	19.3892	14.1876	11.1247	7.72956	ENSMUSG00000104057	upstream	4589	NA
chr1	88701529	88702572	1044	0.0730538	0.985867	-0.104632	0.992342	0.123916	0.69229	-0.0537698	0.905691	31.0898	31.4117	33.9051	38.3848	31.7379	38.1429	27.4127	37.6904	29.2733	34.8314	27.9801	30.0552	ENSMUSG00000097398	downstream	18071	Platr5
chr1	88705910	88706095	186	-0.0370661	0.995667	0.00841882	0.999855	-0.211326	0.679298	-0.165841	0.805161	51.0744	36.7662	31.8787	44.9726	31.6697	32.2086	43.5951	40.1048	47.8267	46.1824	42.8317	43.9314	ENSMUSG00000097398	downstream	22452	Platr5
chr1	88745256	88745674	419	0.0112712	0.998874	-0.314714	0.978918	0.707535	0.0705522	0.381549	0.495493	37.7877	26.3362	24.4433	39.9279	28.5566	26.9136	21.6292	22.2538	22.6007	14.8063	15.4644	26.5224	ENSMUSG00000099848	downstream	50523	NA
chr1	88950105	88950297	193	-0.616524	0.886899	1.29646	0.819437	1.14373	0.0563644	3.05672	5.82526e-05	41.0183	22.5481	40.9633	18.1429	20.9832	27.3886	24.7141	2.89876	5.20395	10.3851	6.05414	16.9352	ENSMUSG00000099378	downstream	173	1700067G17Rik
chr1	89041153	89041577	425	0.175543	0.979994	-0.313991	0.982694	-0.172067	0.776027	-0.661601	0.239033	10.5554	17.9191	10.9922	16.4781	14.2933	18.2419	11.7842	20.6233	21.6064	14.3727	14.2463	24.6099	ENSMUSG00000102700	downstream	14613	NA
chr1	89069432	89071035	1604	0.231701	0.884368	0.0409799	0.996879	0.246388	0.274625	0.0556668	0.885216	51.4936	70.3464	86.7034	83.5617	77.2356	83.4863	83.4122	71.0372	63.2422	69.5596	74.3691	62.5579	ENSMUSG00000102700	downstream	42892	NA
chr1	89078867	89079022	156	0.160865	0.98866	-0.341002	0.986975	-0.296147	0.679098	-0.798015	0.26519	23.6819	22.9146	25.3395	19.9521	27.14	9.0359	48.9212	47.8172	35.8701	26.3082	36.0884	37.7135	ENSMUSG00000102700	downstream	52327	NA
chr1	89080840	89081139	300	0.0673634	0.992939	0.506051	0.945432	-0.3501	0.466098	0.0885876	0.91149	21.1107	35.7468	29.3477	38.9065	36.816	16.4453	27.0289	22.3785	32.0439	34.6778	34.3453	50.117	ENSMUSG00000102700	downstream	54300	NA
chr1	89092561	89092955	395	-0.725145	0.696551	-0.166424	0.993367	0.0494574	0.938811	0.608179	0.240717	39.4156	31.4777	24.109	28.0718	18.641	13.3823	14.4906	19.3569	21.7945	19.8136	15.8662	19.8592	ENSMUSG00000102700	downstream	66021	NA
chr1	89141663	89141804	142	0.455537	0.963731	-0.205147	0.99616	0.292312	0.760428	-0.368372	0.753936	20.4417	20.7958	13.9189	13.6995	11.667	32.262	45.3468	26.2658	21.2189	14.1149	13.4648	39.1299	ENSMUSG00000102083	downstream	42100	Gm5259
chr1	89182205	89182699	495	-0.218845	0.967337	0.715476	0.823121	0.917937	0.0133655	1.85226	1.61423e-05	46.9127	32.0261	42.8328	41.6575	19.3377	45.5629	33.7259	9.79529	12.4639	21.7881	12.8755	21.1297	ENSMUSG00000102083	downstream	1205	Gm5259
chr1	89183380	89183955	576	0.175069	0.969197	0.586744	0.792903	0.0811009	0.859427	0.492776	0.243897	29.7786	27.7923	23.0839	30.058	24.2883	33.0375	34.3658	19.4258	18.6823	30.3232	21.0232	36.3167	ENSMUSG00000102083	overlapEnd	51	Gm5259
chr1	89188222	89188361	140	-0.113398	0.990025	0.311317	0.990495	1.66419	0.000456784	2.0889	0.000429254	47.1222	49.9567	73.1554	51.4122	47.3349	78.0315	37.4771	14.6526	12.2983	21.8157	11.381	16.3425	ENSMUSG00000102083	upstream	3519	Gm5259
chr1	89191177	89191704	528	-0.149419	0.969197	-0.0695044	0.996531	-0.228566	0.467724	-0.148651	0.729645	36.9838	48.8634	41.1767	43.1067	32.7718	31.369	45.6204	43.443	50.8159	46.2757	44.0582	44.5704	ENSMUSG00000102083	upstream	6474	Gm5259
chr1	89196191	89196329	139	0.195185	0.982569	0.663651	0.94547	-0.26005	0.707936	0.208415	0.8306	15.1876	38.0166	23.2679	30.7893	27.8107	32.9583	29.1679	29.516	16.5157	37.0788	33.6244	37.623	ENSMUSG00000102083	upstream	11488	Gm5259
chr1	89454166	89455687	1522	0.306499	0.826449	0.304692	0.935907	-0.0135039	0.96967	-0.0153103	0.97379	21.8459	32.0645	34.9443	39.3667	35.6791	37.7406	34.7864	26.0984	34.0318	40.0086	35.5936	35.8633	ENSMUSG00000101662	upstream	40800	NA
chr1	89524479	89524588	110	-0.143928	NA	-0.776874	0.956385	0.0882859	0.93596	-0.54466	0.585645	11.9947	21.1938	26.1353	15.9163	18.408	22.4255	17.3448	37.2974	22.1742	15.618	20.2789	14.8568	ENSMUSG00000101662	downstream	20155	NA
chr1	89536467	89536903	437	0.0128627	0.998874	-0.047164	0.996879	0.0283825	0.959315	-0.0316442	0.963625	21.1349	28.4524	24.2589	20.032	32.8564	19.3538	26.7415	24.7512	25.9381	25.3351	25.7657	21.6903	ENSMUSG00000101662	downstream	32143	NA
chr1	89544208	89544366	159	-0.0102883	0.999513	0.271488	0.991723	0.981008	0.0866164	1.26278	0.0706342	31.5333	43.9871	23.7313	48.939	34.7321	28.8126	17.9993	15.2474	12.6335	14.4066	18.0378	18.5009	ENSMUSG00000101662	downstream	39884	NA
chr1	89545150	89545503	354	0.197355	0.969672	0.056204	0.996879	1.00233	0.00409573	0.861184	0.056873	29.8174	32.9282	46.6965	48.3584	30.68	37.8283	51.2014	23.1792	17.4284	24.2653	16.2034	23.0826	ENSMUSG00000101662	downstream	40826	NA
chr1	89555054	89555896	843	-0.0159847	0.995667	0.0591393	0.99616	0.0675357	0.81844	0.14266	0.660045	69.4926	77.987	63.3036	74.3055	61.5784	66.4669	75.8191	55.0834	71.9954	62.044	65.3968	72.8918	ENSMUSG00000102009	downstream	22355	NA
chr1	89566594	89567110	517	-0.385234	0.887536	-0.12079	0.995158	-0.518257	0.147373	-0.253813	0.623018	32.1561	33.6695	17.0296	24.0814	17.4467	19.0855	23.5262	31.7425	33.858	31.9376	27.3261	31.6102	ENSMUSG00000102009	downstream	11141	NA
chr1	89573701	89573810	110	-1.08235	NA	0.663424	0.983547	0.542595	0.613016	2.28837	0.0239486	43.1811	29.6713	31.0356	15.9163	11.7142	16.0182	21.681	13.5627	1.30437	8.67669	5.79396	23.7709	ENSMUSG00000102009	downstream	4441	NA
chr1	89577054	89577311	258	0.278125	0.950484	0.148185	0.994715	0.340952	0.444138	0.211011	0.742405	27.6158	39.1564	31.3395	40.7161	37.8149	42.3427	39.7484	20.2389	36.1481	32.1845	36.231	24.0703	ENSMUSG00000102009	downstream	940	NA
chr1	89580056	89580332	277	0.939927	0.471328	0.193104	0.990887	0.614892	0.134014	-0.131932	0.862283	27.6269	19.638	27.2439	66.717	49.8412	27.9885	41.3269	27.6028	26.4169	28.9432	37.1971	24.7792	ENSMUSG00000102009	inside	1805	NA
chr1	89600602	89601183	582	-0.319494	0.952887	-0.457552	0.975612	1.32086	0.0032807	1.1828	0.0296822	27.658	18.9603	16.0539	25.4029	12.019	11.5045	16.8009	8.33104	9.86118	5.24776	5.11037	11.232	ENSMUSG00000102009	inside	10447	NA
chr1	89620073	89620311	239	-0.118675	0.98981	-0.306666	0.983677	-0.218405	0.720979	-0.406396	0.542173	29.8112	37.0669	29.3202	37.4414	33.8892	8.84687	34.9254	45.2563	40.2225	26.3568	31.5557	49.2326	ENSMUSG00000102009	upstream	8443	NA
chr1	89656716	89657185	470	-0.651534	0.782981	-0.304357	0.980078	-0.763446	0.0695406	-0.41627	0.468668	18.528	27.4467	16.0565	15.7282	12.5331	7.49788	16.2377	23.0133	32.3594	26.6024	16.9504	24.3399	ENSMUSG00000102009	upstream	45086	NA
chr1	89688926	89689242	317	-1.33954	0.5096	1.03463	0.937132	1.26297	0.0552247	3.63714	2.34166e-06	38.2923	25.4949	39.677	21.4784	11.0332	16.6751	5.26635	1.76486	3.62095	3.91409	3.35087	12.3729	ENSMUSG00000103252	upstream	63961	NA
chr1	89849347	89850171	825	-0.32437	0.902466	-0.259868	0.976312	-1.19903	8.76054e-06	-1.13453	0.000319907	18.5519	20.346	14.1566	17.9206	15.1727	10.2516	12.1413	37.9756	39.6527	35.2852	35.2788	25.3556	ENSMUSG00000092627	upstream	7785	NA
chr1	89868258	89868376	119	0.248193	0.974768	-0.23993	0.990887	-0.0331147	0.968641	-0.521237	0.497164	33.2627	28.7333	24.1587	31.0598	44.8599	17.7681	38.0783	40.7451	40.9943	31.2798	42.8461	27.4664	ENSMUSG00000034486	upstream	9357	Gbx2
chr1	89880779	89881285	507	-0.100089	0.983447	-0.231083	0.978771	-0.781227	0.00210828	-0.912221	0.00227513	32.2699	64.9886	48.907	50.6475	49.7416	38.2288	44.2172	86.8067	98.7665	84.1485	83.8048	67.6908	ENSMUSG00000034486	upstream	21878	Gbx2
chr1	89931199	89931361	163	0.358718	0.962952	-0.338096	0.983677	-0.358735	0.582017	-1.05555	0.0974643	12.9514	24.7911	18.7396	26.2559	23.7158	23.7816	24.8733	52.6283	28.1679	25.7639	41.707	26.0678	ENSMUSG00000067081	inside	11027	Asb18
chr1	90051307	90051564	258	-0.32405	0.938826	0.0907478	0.996879	0.850059	0.036567	1.26486	0.00651542	54.2088	58.4335	99.5901	50.5182	42.0958	50.538	84.1188	19.5161	38.9287	37.3636	27.1732	29.1378	ENSMUSG00000026301	inside	29559	Iqca
chr1	90153329	90153719	391	-0.409031	0.902719	-0.135874	0.995219	-0.0455638	0.942513	0.227594	0.723288	25.646	30.6072	20.2197	26.8664	20.2441	14.4205	14.0289	20.0319	23.4853	21.725	19.5602	17.5546	ENSMUSG00000104087	downstream	1163	NA
chr1	90202223	90202669	447	-0.116902	0.984078	0.340484	0.976312	0.953944	0.00332857	1.41133	0.000255883	47.2276	42.0714	38.991	59.6218	31.7095	29.1696	35.2134	14.6019	17.3332	20.7115	19.2484	21.205	ENSMUSG00000101028	upstream	5511	NA
chr1	90203803	90204508	706	0.496207	0.835387	-0.210706	0.989573	0.428847	0.304501	-0.278066	0.638018	18.3149	24.656	24.6869	54.5573	23.727	22.9609	25.6732	33.0183	22.152	21.6303	21.8163	28.7035	ENSMUSG00000101028	upstream	3672	NA
chr1	90205430	90205560	131	-0.17224	0.985118	-0.203426	0.993367	-0.345209	0.594231	-0.376395	0.631257	42.302	41.5247	21.9457	41.5795	22.4831	26.9008	32.7697	35.5892	54.7634	30.6002	42.9756	47.4057	ENSMUSG00000101028	upstream	2620	NA
chr1	90225695	90226109	415	0.0464991	0.994174	0.56136	0.883015	0.622312	0.0825953	1.13717	0.00551534	41.3313	39.3234	43.2964	53.9066	30.1625	37.3629	48.8475	12.1329	24.893	31.5079	22.7803	29.1408	ENSMUSG00000101028	downstream	14061	NA
chr1	90234528	90235033	506	0.0645191	0.991241	1.16927	0.187458	1.13347	0.000157753	2.23821	6.76481e-09	43.2854	31.9442	35.1548	45.3653	34.1967	32.0364	40.534	5.89683	9.3574	20.7486	17.4239	12.273	ENSMUSG00000101028	downstream	22894	NA
chr1	90258415	90259169	755	-0.255925	0.950484	1.0504	0.480097	1.44628	1.31904e-05	2.75261	3.9249e-11	46.136	24.0851	32.1282	37.8759	24.1377	27.0718	24.007	2.96404	6.84144	11.6302	9.14499	10.3899	ENSMUSG00000101028	downstream	46781	NA
chr1	90278069	90278266	198	0.267092	0.973902	-0.4182	0.979376	0.116594	0.888315	-0.568698	0.46995	23.9895	12.5593	13.6121	23.5797	19.5236	24.9172	10.8405	28.2556	20.2901	18.3175	16.6308	19.8091	ENSMUSG00000101028	downstream	66435	NA
chr1	90288914	90289233	320	-0.304996	0.962039	0.186274	0.993367	-0.47969	0.358537	0.0115788	0.989829	21.4406	23.7988	26.952	31.6115	13.806	19.8225	12.6698	27.9731	20.1769	26.8435	34.5223	18.3853	ENSMUSG00000101028	downstream	77280	NA
chr1	90359125	90360333	1209	0.316046	0.940885	0.270152	0.987259	1.2368	0.00122257	1.1909	0.0144806	14.8421	13.4981	9.5116	25.2619	12.1807	15.74	9.27135	6.32421	4.74707	7.65759	4.92015	7.56973	ENSMUSG00000101997	downstream	20783	NA
chr1	90428395	90429317	923	-0.0268824	0.995667	-0.13955	0.993049	-1.00486	0.000888765	-1.11752	0.00195811	17.7257	32.3303	14.6002	23.1837	27.7217	15.6537	17.8287	49.905	44.4587	40.8453	50.7521	36.1199	ENSMUSG00000103292	upstream	18901	NA
chr1	90497437	90498086	650	0.0528037	0.992375	0.901501	0.290979	0.25283	0.491008	1.10153	0.00169628	50.341	35.3882	29.8545	45.1914	38.232	44.9988	30.4534	16.0666	19.425	27.1647	31.0497	43.7476	ENSMUSG00000034432	upstream	32617	Cops8
chr1	90502621	90503461	841	0.0175356	0.997571	0.404897	0.956385	1.02625	0.00076743	1.41361	0.000108387	44.556	33.2649	32.9022	54.1268	33.489	31.8459	28.6416	12.8612	14.6722	14.0725	16.1671	26.4278	ENSMUSG00000034432	upstream	27242	Cops8
chr1	90508808	90509847	1040	0.0937737	0.98866	0.103253	0.99616	0.535288	0.126524	0.544767	0.217915	27.6571	25.4053	15.722	36.2878	21.24	22.3639	17.1988	17.0349	14.348	17.8957	14.6056	18.2282	ENSMUSG00000034432	upstream	20856	Cops8
chr1	90522295	90522668	374	0.528949	0.857177	0.787468	0.827877	1.09107	0.00682212	1.34959	0.0089388	19.756	36.1541	33.1495	66.578	44.2974	29.2096	31.2461	9.97258	13.4273	22.7125	14.2009	25.344	ENSMUSG00000034432	upstream	8035	Cops8
chr1	90602912	90603780	869	0.0109917	0.998874	0.424931	0.866133	-0.0387681	0.925644	0.375171	0.298716	37.6544	36.8432	43.2142	46.7863	42.1541	28.3867	39.5197	23.3914	36.8194	38.3312	37.0373	47.7675	ENSMUSG00000056128	inside	29	NA
chr1	90650847	90651239	393	0.0746928	0.992124	0.163301	0.994356	0.00221425	0.997796	0.0908224	0.910232	30.8872	45.8749	21.9457	53.4593	37.0034	15.2438	30.9492	27.9968	33.9533	32.786	37.2995	34.0988	ENSMUSG00000056128	downstream	43332	NA
chr1	90656554	90657300	747	0.339926	0.91025	-0.104834	0.995567	-0.0195828	0.971478	-0.464343	0.322756	17.6629	26.6317	15.3943	36.9794	20.4533	20.2854	22.987	31.206	24.2015	26.3205	21.0454	30.6285	ENSMUSG00000056128	downstream	49039	NA
chr1	90676036	90676595	560	-0.199135	0.965578	-0.308628	0.974375	-0.181535	0.662414	-0.291028	0.528517	23.5611	23.5907	26.3103	18.7585	20.709	19.5079	26.4043	31.6362	28.4398	20.7931	21.6239	32.685	ENSMUSG00000056128	downstream	68521	NA
chr1	90690597	90691443	847	-0.262328	0.938057	-0.355642	0.962731	0.0709503	0.884092	-0.022364	0.972596	29.2858	26.2399	30.7599	26.4123	19.3425	18.7226	30.9728	21.1367	36.9288	23.3257	17.6829	28.556	ENSMUSG00000103061	downstream	73554	NA
chr1	90695581	90695758	178	-0.216794	0.978885	1.3864	0.759303	1.21972	0.0273524	2.82291	0.000154278	42.9924	25.3214	30.2831	26.2291	24.8198	25.7371	34.8357	5.2384	4.03034	15.5498	7.75783	12.8536	ENSMUSG00000103061	downstream	69239	NA
chr1	90698603	90698846	244	-0.537321	0.86686	0.101512	0.996879	2.06843	1.49565e-05	2.70726	2.89202e-06	45.4227	39.4922	39.0289	32.6879	19.6151	31.7738	30.3	6.11433	6.46837	9.77906	5.6594	2.6791	ENSMUSG00000103061	downstream	66151	NA
chr1	90710711	90710851	141	0.348517	0.964252	-0.403341	0.982585	0.374664	0.583756	-0.377194	0.660125	20.5867	17.6364	28.0352	28.9729	22.1941	29.9915	32.137	27.7747	29.5101	25.0455	15.8204	25.4989	ENSMUSG00000103061	downstream	54146	NA
chr1	90734153	90734540	388	0.0368471	0.995667	-0.153781	0.995158	-0.424567	0.408829	-0.615195	0.295314	14.9625	24.8353	15.2821	22.0604	24.1961	11.8072	16.596	20.6674	35.8701	24.8449	18.6163	35.3807	ENSMUSG00000103061	downstream	30457	NA
chr1	90743965	90744506	542	-0.125356	0.981024	-0.209092	0.986975	-0.308992	0.419825	-0.392728	0.383806	28.2385	43.8734	22.2114	34.097	34.3027	24.0568	22.441	37.1598	45.7972	34.3386	36.4528	37.3887	ENSMUSG00000103061	downstream	20491	NA
chr1	90750240	90750486	247	-0.0881239	0.993015	-0.166006	0.995219	-0.974366	0.0752744	-1.05225	0.108625	16.0254	27.6863	10.1843	29.1405	18.6316	4.28016	13.5177	40.0155	35.4344	37.8683	31.8238	30.4354	ENSMUSG00000103061	downstream	14511	NA
chr1	90754116	90754515	400	-0.514146	0.83361	-0.146027	0.993866	-0.788664	0.0336089	-0.420544	0.414655	29.0273	29.9185	25.6044	19.9396	22.5498	12.334	22.6566	27.9731	46.9898	29.8261	28.6801	46.5761	ENSMUSG00000103061	downstream	10482	NA
chr1	90797373	90797805	433	0.192737	0.974768	0.103641	0.996879	0.409127	0.408378	0.320031	0.634842	21.9396	27.2794	24.068	40.434	28.9087	26.0434	15.9728	13.782	25.1836	18.2952	16.4363	30.9488	ENSMUSG00000103978	downstream	500	NA
chr1	90805513	90805680	168	-0.807108	0.799858	-0.381382	0.987622	1.16505	0.0567424	1.59077	0.017173	39.2685	44.406	42.781	28.9483	13.1486	18.8786	35.4897	14.4306	13.6648	11.9305	5.6905	17.5098	ENSMUSG00000103978	upstream	6372	NA
chr1	90834866	90835178	313	-0.371511	0.914167	0.0152553	0.999855	0.3399	0.474949	0.726666	0.14307	53.1141	62.5656	69.461	50.3423	26.4652	61.9234	54.8605	23.2364	50.8828	33.5425	31.5613	51.1682	ENSMUSG00000026303	upstream	7629	Mlph
chr1	90838293	90838982	690	0.0504041	0.992939	0.0471513	0.996879	-0.173608	0.665459	-0.176861	0.728927	28.3006	34.2377	24.2177	40.3162	30.9468	18.3861	28.688	27.0271	38.2614	31.8145	34.176	36.0009	ENSMUSG00000026303	upstream	3825	Mlph
chr1	90843744	90844156	413	-0.214459	0.967544	-0.302854	0.978771	-0.0971452	0.859252	-0.185541	0.759164	25.5578	27.8478	20.0128	26.3773	19.1657	21.3317	17.3238	25.2864	30.2246	26.1141	23.6622	15.8281	ENSMUSG00000026303	inside	937	Mlph
chr1	90849943	90850120	178	-0.517731	0.919271	0.792325	0.929794	-0.170637	0.831507	1.13942	0.10667	34.0974	27.0677	19.1793	20.7647	16.5465	17.818	18.7577	14.6675	9.67282	25.2014	15.5157	22.0348	ENSMUSG00000026303	inside	7136	Mlph
chr1	90896701	90897675	975	-0.0276369	0.995667	0.263876	0.964934	-0.467553	0.0512713	-0.176039	0.643943	38.9737	33.3159	30.4074	36.3128	38.5152	27.8306	30.0865	31.5594	45.1779	48.0644	48.59	41.2334	ENSMUSG00000026304	overlapStart	292	Rab17
chr1	90903975	90904404	430	-0.532521	0.732474	-0.148678	0.990887	-0.118587	0.788118	0.265256	0.565956	55.8453	52.4094	53.904	44.7877	42.3812	22.947	36.6055	34.2616	55.0564	39.2873	45.4534	35.7255	ENSMUSG00000100791	upstream	993	NA
chr1	90908990	90910164	1175	-0.109995	0.980648	0.0680756	0.996879	-0.529943	0.0639268	-0.351873	0.375376	23.8057	44.047	39.6061	40.5621	35.2494	19.4945	37.1436	46.5028	45.5473	47.6812	50.1732	46.7326	ENSMUSG00000100791	upstream	6008	NA
chr1	90973285	90973504	220	0.5196	0.893435	-0.426228	0.978523	0.531297	0.322034	-0.41453	0.565344	19.1916	38.1488	23.6851	67.2022	26.7753	30.4346	31.4374	33.9068	39.131	31.6699	24.1415	25.2566	ENSMUSG00000026305	inside	46826	Lrrfip1
chr1	90975083	90975409	327	-0.700675	0.797765	-2.26851	0.000947474	1.38822	0.00525662	-0.179621	0.819017	36.3143	20.9129	24.7266	11.3031	17.451	19.3982	18.9626	26.2337	34.6634	4.08627	6.17196	10.995	ENSMUSG00000026305	inside	48624	Lrrfip1
chr1	90980171	90981540	1370	0.0970151	0.982352	0.280674	0.970256	-0.157876	0.634986	0.0257824	0.961097	25.0401	35.2817	22.2961	35.4987	27.8136	21.8642	32.379	24.9103	29.3244	31.4198	37.2942	29.8221	ENSMUSG00000026305	inside	53712	Lrrfip1
chr1	90998344	90999234	891	0.187212	0.967519	-0.0185271	0.99854	0.259652	0.509761	0.0539129	0.933467	28.7281	27.7351	16.9395	31.4396	19.6269	38.3646	22.7516	26.1626	20.9343	25.923	23.4858	19.4423	ENSMUSG00000026305	inside	57432	Lrrfip1
chr1	91017177	91017650	474	-0.0156157	0.998874	-0.214935	0.989573	-0.0555505	0.923391	-0.25487	0.657044	25.0523	23.9361	16.3001	26.6764	18.2527	24.5342	16.6038	29.5075	22.3999	19.3304	20.3929	28.9614	ENSMUSG00000070732	upstream	55161	Rbm44
chr1	91024069	91024210	142	-0.342181	0.967337	-0.149953	0.99616	-0.646077	0.31512	-0.453849	0.592455	18.5834	29.5519	37.9606	30.1389	12.9634	32.262	18.4746	27.5791	51.5316	31.5905	27.6777	52.9405	ENSMUSG00000070732	upstream	48601	Rbm44
chr1	91052726	91053760	1035	-0.0738383	0.980806	-0.0751752	0.994356	-0.0314708	0.916818	-0.0328077	0.93148	46.6578	56.1618	56.4213	56.1983	43.9302	49.3701	52.9979	52.0723	56.8376	52.2865	50.3916	52.7381	ENSMUSG00000070732	upstream	19051	Rbm44
chr1	91062141	91062766	626	-0.00390974	0.99962	-0.31429	0.980361	-0.529041	0.261699	-0.839422	0.103928	10.117	12.9104	6.60166	12.1194	8.52767	10.1329	8.76244	21.449	14.2105	11.2825	13.9141	18.7965	ENSMUSG00000070732	upstream	10045	Rbm44
chr1	91065293	91065413	121	-0.20094	0.98248	-0.0515632	0.996879	-0.346941	0.615777	-0.197564	0.835638	26.1703	33.3962	29.6992	22.5079	22.8198	40.7736	21.681	36.9892	32.0162	27.6077	41.26	29.7136	ENSMUSG00000070732	upstream	7398	Rbm44
chr1	91077316	91077822	507	-0.570692	0.757894	-0.626908	0.805882	0.194401	0.685996	0.138186	0.819105	29.147	28.5092	22.3271	14.1967	17.0646	21.5472	19.7566	20.966	27.1678	17.5074	12.1517	18.0509	ENSMUSG00000070732	inside	4505	Rbm44
chr1	91088087	91088822	736	-0.603981	0.597227	-0.419748	0.891264	-0.333304	0.315383	-0.149072	0.752997	30.4758	28.7191	30.2722	20.0876	18.2579	22.025	18.4701	24.3244	41.3285	24.2499	22.3703	28.4217	ENSMUSG00000100018	downstream	10329	Gm7776
chr1	91095180	91095566	387	-0.606283	0.830362	-0.440443	0.978771	1.27186	0.00603962	1.4377	0.00661068	30.6842	29.3171	29.7145	29.1548	15.6968	10.0165	22.1852	10.1195	11.864	10.8515	7.68536	4.22287	ENSMUSG00000100018	downstream	3585	Gm7776
chr1	91098921	91099053	133	-0.256975	NA	-1.27854	0.7162	0.93358	0.187871	-0.087989	0.941099	27.7773	28.0459	24.3176	33.641	12.4565	23.8466	19.7248	25.2389	31.2852	14.3524	7.188	14.7451	ENSMUSG00000100018	downstream	98	Gm7776
chr1	91216165	91216897	733	-0.372523	0.887536	-0.482953	0.893004	0.0664823	0.896265	-0.0439474	0.945727	21.2403	22.6876	19.6104	17.2505	14.0634	14.9037	19.1964	19.0812	24.468	11.7189	15.2161	21.8494	ENSMUSG00000083064	upstream	6870	NA
chr1	91249953	91250643	691	0.0877424	0.973902	0.0784891	0.993049	-0.0063901	0.983074	-0.0156433	0.96635	68.3578	73.0996	70.7279	79.6711	71.1279	75.4779	74.895	68.2797	74.7509	79.5594	74.0945	72.3705	ENSMUSG00000049515	inside	156	Espnl
chr1	91297969	91298900	932	-0.0671837	0.985118	0.215427	0.974126	-0.0534235	0.864146	0.229188	0.451355	64.5554	71.5403	58.9937	70.9668	58.6607	64.6571	54.2489	50.0234	60.8097	69.7394	54.365	70.1395	ENSMUSG00000047443	inside	3039	Erfe
chr1	91299838	91300340	503	0.182424	0.970368	0.386999	0.959641	-0.40986	0.278384	-0.205284	0.717937	26.231	45.4212	26.7913	51.8238	43.5498	23.8203	28.9223	36.3335	39.9348	43.6422	50.0492	57.1825	ENSMUSG00000047443	inside	1599	Erfe
chr1	91398043	91399082	1040	0.111743	0.979184	0.303531	0.970404	0.209778	0.539868	0.401567	0.289972	31.2094	28.0953	25.5698	43.9569	24.957	28.8019	23.8491	21.3384	21.3841	28.3578	26.8621	23.2566	ENSMUSG00000101911	upstream	223	NA
chr1	91412801	91414022	1222	-0.0487594	0.991026	0.0175597	0.997773	-0.214748	0.427423	-0.148429	0.688681	42.757	44.6422	31.319	42.5043	45.3422	33.7404	30.4456	42.2725	45.3219	46.7846	42.3326	43.8653	ENSMUSG00000100151	downstream	305	NA
chr1	91446079	91446477	399	0.0277301	0.995667	0.0787228	0.996879	0.26645	0.527772	0.317443	0.540607	37.0364	34.6678	36.9267	38.5165	48.9035	28.2627	29.886	24.3041	33.4428	32.0537	36.7386	20.4793	ENSMUSG00000026311	upstream	21789	Asb1
chr1	91455716	91456741	1026	0.114623	0.973902	0.368866	0.876764	-0.0404965	0.911089	0.213746	0.554528	38.8368	36.8102	32.0482	49.2968	35.5242	29.195	39.9809	29.2636	32.4439	39.3496	37.3746	43.6437	ENSMUSG00000026311	upstream	11525	Asb1
chr1	91457834	91458581	748	-0.275715	0.866278	-0.0908655	0.993367	-0.195278	0.46765	-0.0104287	0.981434	44.4511	48.4132	37.9538	36.1498	32.9769	35.3342	39.8547	44.378	43.5428	38.4071	42.0346	44.1335	ENSMUSG00000026311	upstream	9685	Asb1
chr1	91459061	91459678	618	0.0223425	0.995667	0.28492	0.948258	-0.0475535	0.889575	0.215024	0.529281	74.2975	87.0156	88.0955	96.322	75.9554	61.0143	103.423	73.3275	70.3471	93.5903	86.4563	81.448	ENSMUSG00000026311	upstream	8588	Asb1
chr1	91483410	91483694	285	0.168734	0.985118	-0.00800217	0.999855	0.188352	0.796994	0.0116163	0.991083	19.4441	21.2681	11.9787	28.668	16.1474	18.5474	15.0626	20.9389	14.0963	15.4049	11.9267	27.5242	ENSMUSG00000026311	inside	3617	Asb1
chr1	91494441	91494814	374	0.174365	0.967544	0.120646	0.993367	-0.0844796	0.844667	-0.138199	0.786929	36.6898	30.3362	42.7581	45.7724	41.3442	42.4011	35.0722	38.3944	41.8164	46.1906	47.431	34.9572	ENSMUSG00000026311	downstream	7130	Asb1
chr1	91540021	91541060	1040	-0.130313	0.943564	-0.0302642	0.996879	-0.366074	0.0261211	-0.266025	0.225668	80.6877	83.9871	83.6203	77.2519	75.402	78.9512	71.3179	92.1677	106.782	107.191	96.4174	87.3695	ENSMUSG00000101705	inside	893	NA
chr1	91600787	91600936	150	-0.580526	0.910976	-0.282174	0.991335	0.383072	0.632066	0.681425	0.421439	36.9438	40.4095	14.3744	22.047	17.1808	25.8427	17.4893	19.892	18.1742	14.6347	12.7467	21.79	ENSMUSG00000101705	downstream	48565	NA
chr1	91692801	91692970	170	-0.91883	0.804889	0.170709	0.996879	0.709998	0.361939	1.79954	0.0205379	41.911	31.0842	30.6513	12.5874	15.1595	12.4377	32.2664	14.2608	5.90801	7.86006	8.12291	21.1491	ENSMUSG00000007805	upstream	36213	Twist2
chr1	91713271	91713398	128	-2.45254	NA	0.790357	0.983547	0.408184	0.771744	3.65108	0.00156587	45.3551	31.5699	37.9013	9.11872	5.7525	2.75313	9.31604	0	5.6047	8.20219	0.829864	7.66054	ENSMUSG00000007805	upstream	15785	Twist2
chr1	91800932	91802199	1268	0.0674749	0.98981	0.150236	0.989573	-0.25967	0.397578	-0.176909	0.677287	24.7652	32.2364	20.4053	25.1604	21.9212	32.2385	29.9054	34.1207	24.5546	32.0654	28.9013	37.1186	ENSMUSG00000102745	upstream	41783	NA
chr1	91816715	91817048	334	0.129831	0.98981	0.144727	0.996531	0.69196	0.221473	0.706856	0.328506	27.6525	21.8706	33.8917	26.7919	18.1876	28.4874	48.555	12.2836	21.4791	18.8601	8.26883	32.2936	ENSMUSG00000102745	upstream	26934	NA
chr1	91823402	91823853	452	-0.0927381	0.98866	0.232581	0.983677	0.47156	0.181801	0.79688	0.0438404	48.4566	49.1708	40.5473	34.4305	41.9475	54.5753	43.266	23.9298	28.8865	20.2712	32.9008	43.3872	ENSMUSG00000102745	upstream	20129	NA
chr1	91857209	91858784	1576	0.0351726	0.991343	-0.0318828	0.996879	0.0167722	0.953449	-0.0502832	0.88261	33.8227	43.1944	38.6494	39.2521	42.0488	38.4599	38.7396	38.3387	41.7877	37.6687	39.4965	40.8562	ENSMUSG00000102745	downstream	9936	NA
chr1	91874668	91875053	386	0.169926	0.974768	-0.220424	0.98867	0.28428	0.529661	-0.10607	0.877098	15.7237	23.7561	23.7401	23.1826	23.3677	27.3886	22.8605	24.1564	21.9309	16.5666	19.8135	24.5561	ENSMUSG00000103101	upstream	28656	NA
chr1	91912439	91912548	110	-0.234142	NA	-0.424408	0.989573	0.935203	0.261101	0.744937	0.48534	38.3832	19.7808	34.3025	44.212	13.3876	28.8327	17.3448	23.7347	13.0437	13.8827	6.75962	23.7709	ENSMUSG00000103101	downstream	3153	NA
chr1	91962418	91962527	110	-0.369887	NA	0.0428225	0.998688	0.576071	0.591436	0.988781	0.408953	52.7768	21.1938	13.0676	24.7587	18.408	35.24	10.8405	25.4301	3.9131	8.67669	14.4849	23.7709	ENSMUSG00000102565	upstream	12599	NA
chr1	92075006	92075944	939	-0.666647	0.691612	0.104128	0.99616	-0.32155	0.458749	0.449225	0.362903	19.9529	16.5518	14.1601	14.5019	9.21381	10.8835	7.61951	12.7105	11.9185	9.9611	13.1223	17.7522	ENSMUSG00000026313	inside	47477	Hdac4
chr1	92100514	92100848	335	-0.352317	0.967887	-0.796371	0.937132	0.10745	0.910411	-0.336604	0.731316	11.8157	17.6298	15.5544	23.2278	13.1878	4.20776	4.98339	23.3805	14.9905	12.251	12.0491	7.80537	ENSMUSG00000026313	inside	22573	Hdac4
chr1	92130441	92130963	523	-0.490619	0.737003	-0.907013	0.11609	-0.324751	0.324501	-0.741145	0.0219889	41.8784	70.7269	49.4721	34.2199	51.3876	30.995	36.9364	81.655	100.134	52.7404	49.1508	42.4967	ENSMUSG00000026313	upstream	7020	Hdac4
chr1	92144766	92145214	449	0.0209657	0.998766	0.408901	0.978918	1.31066	0.00260797	1.69859	0.00167182	20.57	21.8074	21.2094	23.3959	21.3189	28.2548	13.8101	7.06076	6.07155	6.37708	6.38755	16.0149	ENSMUSG00000026313	upstream	21345	Hdac4
chr1	92180159	92181206	1048	0.16125	0.933144	0.100375	0.990735	0.145215	0.534154	0.0843404	0.799677	98.7048	120.422	143.847	143.301	122.603	138.203	138.589	108.013	120.616	127.228	133.589	105.415	ENSMUSG00000026313	upstream	56738	Hdac4
chr1	92215226	92216863	1638	0.11857	0.97698	0.0241576	0.996879	-0.668721	0.00917282	-0.763133	0.0133286	18.2045	14.2327	12.7246	14.0139	18.88	10.757	20.675	23.4532	27.242	26.4538	23.6699	27.5368	ENSMUSG00000101265	upstream	35369	NA
chr1	92379123	92379477	355	-0.639169	0.733469	-0.789153	0.63506	-0.374638	0.394783	-0.524621	0.261354	42.3701	30.6464	23.2825	18.0833	21.7785	20.8462	20.8259	53.5822	37.9919	30.3806	22.7406	25.7797	ENSMUSG00000098288	downstream	12728	Mir6900
chr1	92473381	92474501	1121	0.101564	0.976321	0.147178	0.987259	0.301659	0.233436	0.347272	0.266408	28.7189	37.1568	33.1791	38.3512	30.7074	33.0081	40.2094	26.4509	25.7266	29.9698	32.3121	23.034	ENSMUSG00000058904	upstream	24543	Olfr1413
chr1	92641683	92642212	530	0.0540337	0.990025	-0.275698	0.94071	-0.0190566	0.95681	-0.348789	0.215054	55.2663	57.4764	55.2601	51.0189	61.4758	57.8468	62.5475	76.7061	66.3258	61.5881	61.1281	52.4193	ENSMUSG00000100546	overlapEnd	256	NA
chr1	92647891	92648097	207	-0.0752776	0.992914	-0.399301	0.978743	0.277036	0.641782	-0.0469874	0.959121	38.2441	21.0231	39.9289	25.3738	32.9032	28.9411	36.8681	30.6307	36.7365	27.6648	31.3023	14.2109	ENSMUSG00000100546	upstream	2967	NA
chr1	92703879	92704612	734	-0.319717	0.833507	-0.574127	0.474387	-0.495203	0.0331959	-0.749614	0.00340782	54.6463	50.8188	53.1207	34.189	41.1296	39.8491	54.2615	77.7453	99.4979	65.0161	52.6772	61.4513	ENSMUSG00000099665	upstream	15677	NA
chr1	92831210	92832059	850	0.151917	0.970882	0.178793	0.98867	-0.027548	0.953089	-0.000671884	0.998859	19.8689	24.6845	29.383	22.8862	27.9369	39.3859	21.3239	25.6694	23.9696	32.3385	24.3687	27.3016	ENSMUSG00000034212	upstream	582	Ankmy1
chr1	92837901	92838144	244	-0.077287	0.992241	-0.280861	0.984849	-0.0176076	0.980266	-0.221181	0.753009	33.5263	32.4855	22.8282	39.066	24.8961	28.8853	18.571	35.9217	32.9299	30.5107	31.7797	20.0932	ENSMUSG00000097251	inside	342	5033417F24Rik
chr1	92903807	92903941	135	-0.765289	NA	-0.0948182	0.996879	-1.18991	0.108683	-0.519439	0.619681	27.3658	14.9665	18.6335	18.7328	19.0898	0	5.29979	26.2463	30.8217	28.9866	22.8182	29.0533	ENSMUSG00000026271	inside	10172	Gpr35
chr1	92906754	92907593	840	0.0288536	0.994031	0.102749	0.990735	0.214658	0.35555	0.288553	0.294151	48.0646	54.5824	46.8451	56.9703	50.8412	49.5038	45.9946	40.4056	41.336	44.4267	45.6504	40.8562	ENSMUSG00000100021	downstream	19525	NA
chr1	92910533	92911148	616	-0.0165625	0.997305	0.190556	0.983677	0.0387681	0.928832	0.245887	0.553616	31.7004	38.6029	45.2117	36.317	28.9866	46.9104	42.5876	32.6958	32.6091	37.6506	41.0406	31.836	ENSMUSG00000100021	downstream	15970	NA
chr1	92934150	92935035	886	-0.185302	0.926791	0.0150119	0.997773	-0.203537	0.392092	-0.00322382	0.994259	87.5643	111.566	80.9168	88.4838	83.3139	71.196	85.0599	82.088	105.1	104.6	88.5988	90.3817	ENSMUSG00000045091	inside	94	Aqp12
chr1	93071455	93071751	297	-0.619546	0.890101	-0.546848	0.952959	-1.67149	0.000565983	-1.59879	0.00258601	12.439	11.5127	9.67973	5.89493	6.81778	4.74613	11.242	27.6277	39.6141	19.6029	21.8168	29.7136	ENSMUSG00000026272	inside	1392	Agxt
chr1	93101902	93102077	176	-0.880602	NA	-0.257407	0.995219	0.48562	0.641068	1.10881	0.28482	25.4888	16.7784	24.5018	22.106	12.5509	8.0091	4.06518	11.6555	8.96751	7.04981	3.62123	18.571	ENSMUSG00000084989	inside	5455	Crocc2
chr1	93115131	93115493	363	-0.329443	0.94405	-0.267792	0.98867	0.382689	0.476112	0.44434	0.483244	27.6242	19.6952	20.7894	23.5797	16.2274	18.4452	13.14	13.8709	18.9726	12.0948	11.4123	19.8091	ENSMUSG00000084989	inside	18684	Crocc2
chr1	93139617	93140054	438	-0.624148	0.676298	0.131349	0.995158	0.739477	0.0306568	1.49497	5.737e-05	56.0302	44.3553	58.2524	31.978	24.7962	42.642	39.2039	14.4762	22.603	19.1759	16.9762	27.6106	ENSMUSG00000047793	upstream	23509	Sned1
chr1	93174589	93174714	126	-0.227515	0.980377	-0.0992346	0.996879	0.114585	0.897563	0.242866	0.809586	58.6409	23.4365	29.9467	41.6856	23.3753	30.7651	28.3917	22.2009	38.7169	27.2696	19.3898	44.0988	ENSMUSG00000047793	inside	11026	Sned1
chr1	93176485	93176990	506	0.187585	0.950927	0.242984	0.976312	0.421503	0.113955	0.476902	0.152457	37.5487	43.0018	44.0323	54.5922	40.745	50.8404	44.3046	28.0099	31.7585	36.7816	36.3172	32.2974	ENSMUSG00000047793	inside	12922	Sned1
chr1	93183681	93184550	870	-0.102857	0.987924	0.262496	0.978918	-0.877606	0.00598415	-0.512252	0.251415	16.9856	17.6858	11.9787	19.9005	14.1763	8.10115	14.5287	26.1511	18.3061	23.2575	29.1807	27.4253	ENSMUSG00000098997	upstream	17721	Mir6901
chr1	93210319	93210691	373	0.233411	0.967143	0.447795	0.956385	-0.554179	0.170525	-0.339794	0.562966	23.3463	35.8343	27.9395	48.5028	22.2081	30.2327	36.4449	46.4968	28.0806	41.9645	43.5712	69.2256	ENSMUSG00000098997	downstream	7987	Mir6901
chr1	93235467	93236482	1016	-0.169316	0.940885	-0.164057	0.980624	0.0203805	0.95212	0.0256395	0.952545	59.9973	67.6142	58.8912	55.7175	43.8459	67.9827	55.3974	53.4132	68.6332	57.1159	53.5295	52.7592	ENSMUSG00000100351	upstream	506	NA
chr1	93252589	93252981	393	0.225336	0.969197	0.0320395	0.997053	-0.252612	0.60737	-0.445909	0.422085	16.1151	19.3782	13.716	18.3148	22.9515	12.5537	21.8465	21.828	23.0006	26.4716	20.2715	21.6237	ENSMUSG00000026275	upstream	17595	Ppp1r7
chr1	93305725	93305949	225	-0.890989	0.597227	-0.168589	0.993367	-0.549783	0.247655	0.172617	0.806685	36.3574	42.1364	31.1445	19.8856	17.1808	26.6258	16.9593	37.2974	28.0584	32.6629	25.9655	27.6007	ENSMUSG00000034107	inside	4073	Ano7
chr1	93342612	93343873	1262	-0.117389	0.964252	-0.091531	0.990735	-0.0731321	0.780023	-0.0472743	0.893386	59.3844	69.5823	67.7715	69.2117	54.9906	56.9649	60.851	62.2117	73.4455	69.8054	62.7067	57.7556	ENSMUSG00000090489	upstream	5549	Gm17415
chr1	93444790	93446161	1372	-0.102509	0.974768	0.199703	0.978743	-0.278766	0.256563	0.0234456	0.959121	42.3138	51.9958	48.0631	55.439	35.0182	51.1134	36.156	49.3403	44.3408	53.4262	54.4275	53.3633	ENSMUSG00000034066	inside	4989	Farp2
chr1	93477916	93479685	1770	0.173865	0.94405	0.224089	0.974375	0.194769	0.482313	0.244993	0.468419	43.9807	55.0559	72.7856	80.4508	52.104	56.9415	69.2566	50.8889	46.0434	58.0211	57.0721	54.475	ENSMUSG00000103854	downstream	15992	NA
chr1	93511514	93512507	994	0.0303113	0.994031	0.0588087	0.99616	-0.0560774	0.858651	-0.0275801	0.94936	61.8562	87.8738	71.7635	72.2158	78.5211	73.3872	78.4572	76.9213	74.194	85.7456	88.6969	59.1881	ENSMUSG00000100927	upstream	50408	NA
chr1	93529844	93530205	362	-0.506624	0.91025	0.560728	0.97519	1.05176	0.0569255	2.11911	0.000744019	20.4109	24.4724	33.2557	18.8084	13.7297	30.1779	12.5175	5.66674	6.34167	10.8099	3.81462	13.5435	ENSMUSG00000100927	upstream	32710	NA
chr1	93634576	93636429	1854	0.0394289	0.990227	0.0765489	0.992281	0.012394	0.964221	0.049514	0.877621	41.561	46.2742	45.5499	50.3644	45.4739	46.9487	40.263	41.4416	44.5764	47.104	46.3506	42.1344	ENSMUSG00000026278	downstream	11090	Bok
chr1	93668767	93669224	458	-0.0483126	0.994031	-0.00400626	0.999855	-0.267895	0.526686	-0.223589	0.685515	29.9607	30.2019	21.9696	28.4578	27.3307	34.6245	16.1424	26.8737	36.6532	27.091	33.6294	35.6823	ENSMUSG00000101952	inside	9570	NA
chr1	93678492	93678791	300	0.846248	0.608303	0.487365	0.952959	0.0963086	0.868823	-0.262575	0.701617	17.5923	17.6144	11.9787	27.883	29.4528	23.4933	31.0038	20.5136	17.2176	23.2246	31.1586	23.969	ENSMUSG00000026280	upstream	431	Atg4b
chr1	93680197	93680380	184	-0.664667	0.853071	1.42503	0.532144	0.201764	0.787623	2.29146	0.000318332	67.4052	37.1659	33.2017	21.1448	38.0165	36.3892	19.4422	9.12166	9.3574	30.0855	28.2875	12.4345	ENSMUSG00000026280	inside	975	Atg4b
chr1	93685424	93685985	562	-0.0973847	0.978887	0.0798083	0.995158	-0.402823	0.0890371	-0.22563	0.5067	49.7718	50.6086	49.8756	47.4216	56.3377	43.2662	39.0412	55.7471	61.2727	62.6667	66.3419	55.2504	ENSMUSG00000026279	upstream	2838	Thap4
chr1	93687886	93688932	1047	0.0694377	0.98981	-0.114039	0.993049	-0.925768	8.58908e-05	-1.10925	7.33006e-05	34.5293	61.3074	35.5241	46.0784	58.0195	35.0044	44.6458	84.7831	105.109	86.8747	89.0768	87.4097	ENSMUSG00000026279	upstream	5300	Thap4
chr1	93695117	93695254	138	0.0953762	NA	0.426941	0.986834	0.239292	0.786154	0.570856	0.562339	26.7709	16.8936	16.9264	26.7835	14.6731	22.9826	20.7383	10.8109	15.5957	14.524	20.7827	18.9478	ENSMUSG00000026279	upstream	12531	Thap4
chr1	93726251	93726357	107	-1.01304	NA	-0.877768	0.978743	-0.842827	0.535114	-0.707552	0.652616	9.86483	11.6203	16.7925	3.63612	3.44075	0	17.8311	33.1146	9.38656	9.81196	5.95641	21.3827	ENSMUSG00000026281	inside	3299	Dtymk
chr1	93727063	93727169	107	-0.846425	NA	-0.305158	0.995158	-0.758898	0.463259	-0.217632	0.885194	27.1283	7.26266	21.8303	9.09031	12.0426	13.1738	6.68665	20.9145	21.455	26.7599	12.9056	9.16402	ENSMUSG00000026281	inside	2487	Dtymk
chr1	93754063	93755413	1351	0.00746671	0.998874	0.157466	0.979376	-0.194174	0.409796	-0.0441749	0.910356	40.6276	42.9105	39.3673	44.6374	46.5991	33.6489	38.8364	46.2422	38.4455	47.4745	51.0277	42.0961	ENSMUSG00000073609	inside	1432	D2hgdh
chr1	93801728	93802148	421	0.00966089	0.998874	0.0917351	0.993929	-0.129573	0.670733	-0.0474987	0.917178	75.2164	81.5868	93.8945	81.7869	90.0724	60.268	102.534	89.4784	83.8388	91.3629	94.364	90.8348	ENSMUSG00000094651	inside	2068	Gal3st2
chr1	93803560	93804505	946	0.0684158	0.984078	0.0345205	0.996879	0.0736979	0.788131	0.0398026	0.917075	62.2053	70.8102	71.986	70.7391	64.6032	70.7781	81.4297	74.7132	58.8481	68.7073	73.6597	61.1548	ENSMUSG00000094651	overlapEnd	289	Gal3st2
chr1	93824704	93825651	948	0.115751	0.97077	-0.21427	0.974375	0.215566	0.409796	-0.114455	0.761229	40.6404	38.1995	42.077	52.9424	42.5248	39.0317	39.2453	40.1302	46.9186	41.077	38.8811	31.3748	ENSMUSG00000101660	upstream	8315	NA
chr1	94034921	94035664	744	-0.0921325	0.975733	-0.121904	0.989573	0.309502	0.162457	0.279731	0.326029	87.252	81.4707	85.2514	66.6745	72.7413	96.1522	83.9846	69.9327	69.4259	63.1159	72.6711	54.475	ENSMUSG00000026285	upstream	54643	Pdcd1
chr1	94079188	94079389	202	-0.192633	0.97698	-0.104834	0.996879	0.213557	0.729484	0.301356	0.677299	47.0289	40.7788	88.9505	32.7431	62.8788	62.804	49.5872	60.9315	35.5149	29.2946	44.1718	64.7228	ENSMUSG00000100990	upstream	52753	Gm7891
chr1	95016880	95016988	109	0.982471	NA	1.71141	0.961901	2.44167	0.0191113	3.17061	0.0768084	7.26287	11.407	19.7813	24.9858	10.1328	48.4954	21.8799	0	2.63266	0.87563	2.92356	14.9931	ENSMUSG00000089310	upstream	49112	Gm23181
chr1	95313345	95314472	1128	-0.0078157	0.998874	-0.122099	0.990735	-0.240096	0.383628	-0.354379	0.264541	87.4935	72.1991	83.787	56.9111	74.089	101.846	91.1254	107.462	99.851	108.22	101.137	74.7582	ENSMUSG00000103973	downstream	54402	NA
chr1	95451882	95452205	324	0.0582918	0.997395	0.449179	0.993049	-0.116765	0.941678	0.274122	0.887517	79.0024	31.1801	25.5101	79.254	14.2037	67.4346	27.235	25.3254	49.1553	22.388	23.9329	107.941	ENSMUSG00000081051	downstream	25006	Gm15427
chr1	95667490	95667837	348	-0.804418	0.794474	-0.496603	0.978771	1.25057	0.026438	1.55838	0.0139628	40.9475	18.7577	46.469	8.38503	20.1007	24.3035	28.7834	17.6841	6.59679	9.32495	8.24141	7.51379	ENSMUSG00000102718	inside	181	NA
chr1	97660480	97662289	1810	-0.0135704	0.997029	-0.0752322	0.995158	-0.154731	0.555686	-0.216393	0.485412	56.859	54.8696	54.4996	44.0654	55.6308	52.9574	66.9355	73.0494	55.8067	69.5526	62.3251	50.3818	ENSMUSG00000026333	upstream	35608	Gin1
chr1	97769367	97770772	1406	0.0276457	0.994522	-0.0799364	0.995158	-0.201108	0.430609	-0.308691	0.290921	53.1147	65.5509	61.7251	47.7338	60.88	67.6729	70.0545	81.8368	67.5561	82.3422	70.3366	57.8845	ENSMUSG00000104140	downstream	35335	NA
chr1	97833362	97833958	597	-0.0951981	0.987924	-0.0874494	0.996531	0.235645	0.560045	0.243393	0.629767	24.753	23.17	21.068	24.4388	17.2671	18.2988	25.5668	20.3043	18.5058	18.3853	20.8175	14.2347	ENSMUSG00000104140	upstream	25572	NA
chr1	97834415	97834727	313	0.0605198	0.993584	-0.319822	0.980153	0.441231	0.354857	0.0608893	0.940483	27.8217	22.8414	26.4066	21.1313	34.1107	25.8952	25.1444	26.2155	22.9202	26.834	14.9323	15.6637	ENSMUSG00000104140	upstream	26625	NA
chr1	97851612	97852163	552	-0.335998	0.89556	-1.02124	0.0890998	0.168492	0.690265	-0.51675	0.18255	36.3319	28.7191	36.1313	25.7262	20.0087	24.2594	36.7241	48.311	47.8267	25.0712	26.9405	17.1715	ENSMUSG00000089782	downstream	24463	NA
chr1	97887495	97888307	813	-0.302654	0.940694	-0.941479	0.457779	0.41528	0.339946	-0.223544	0.707698	14.9307	22.3669	21.2168	8.37471	22.6421	15.6044	17.0141	21.1031	24.7075	12.0919	9.92979	14.4731	ENSMUSG00000089782	upstream	10381	NA
chr1	97976759	97977495	737	-0.293876	0.866532	-0.308065	0.94071	-0.223679	0.437242	-0.237869	0.503977	83.068	75.4962	87.7677	45.6637	57.6967	87.9805	78.9576	95.3944	98.1194	80.4213	77.5411	76.2798	ENSMUSG00000119063	upstream	52	NA
chr1	98002446	98003153	708	-0.0628076	0.98993	-0.24228	0.974375	-0.235165	0.425687	-0.414637	0.195586	39.5081	44.5628	44.92	32.9716	40.04	35.3396	56.591	62.4258	52.6905	47.4522	50.5608	47.5502	ENSMUSG00000089706	upstream	17041	B230216N24Rik
chr1	98038130	98038580	451	-0.863369	0.483686	-0.729102	0.746185	-0.114846	0.836687	0.0194213	0.979325	46.2236	34.806	47.8084	10.3521	23.6733	28.1295	33.3147	40.5227	43.903	23.2789	24.4948	29.7136	ENSMUSG00000026335	upstream	14759	Pam
chr1	98056350	98056689	340	-0.27569	0.960705	-0.801726	0.746185	0.461587	0.336738	-0.0644496	0.935008	20.9555	24.6845	26.952	15.4482	22.1979	15.5471	26.6548	24.6821	26.164	12.913	13.434	19.2265	ENSMUSG00000100182	upstream	2492	1810006J02Rik
chr1	98084116	98084764	649	-0.24163	0.967337	-0.660768	0.870779	0.799276	0.0632434	0.380138	0.533128	21.1433	14.1292	13.566	11.9897	13.8982	9.77381	18.3737	12.3559	12.3804	9.55907	5.23748	9.06517	ENSMUSG00000100711	upstream	16609	Gm29461
chr1	98094748	98095952	1205	0.0420445	0.991026	0.0138344	0.997991	-0.183141	0.435296	-0.211351	0.465302	75.9899	65.1349	73.214	60.2163	80.6592	71.3574	81.542	78.7734	86.3263	90.8496	90.0027	67.5399	ENSMUSG00000100711	upstream	5421	Gm29461
chr1	98096613	98096897	285	-0.0100042	0.998874	-0.265607	0.984068	-0.49453	0.266378	-0.750133	0.131027	36.1105	32.7202	26.4792	21.8423	41.9832	16.0744	43.5141	47.7669	58.399	35.8332	53.2977	43.58	ENSMUSG00000100711	upstream	4476	Gm29461
chr1	98280359	98280713	355	-0.515819	0.876129	0.152149	0.995158	-0.922445	0.0279026	-0.254477	0.704103	15.6101	21.0147	16.7026	10.9596	16.5931	7.94141	13.4361	20.4873	22.2293	21.2396	24.2367	26.7004	ENSMUSG00000026336	upstream	68136	Slco6d1
chr1	98748948	98749118	171	-0.911161	NA	-0.844675	0.948258	-0.729187	0.412196	-0.662701	0.51034	16.975	9.99784	17.8629	2.27524	9.68843	12.3649	8.36809	25.0831	21.8157	18.4189	11.1813	7.64561	ENSMUSG00000099686	downstream	55669	NA
chr1	98930725	98931347	623	-0.0610172	0.993015	-0.305857	0.978771	-1.30893	0.000114506	-1.55377	9.38192e-05	20.7549	22.203	20.7656	9.36754	31.9112	12.4443	26.7967	65.2556	59.6491	45.6536	56.4361	49.316	ENSMUSG00000087804	upstream	13744	Gm23434
chr1	98955460	98955855	396	-0.601538	0.826277	-0.358723	0.976312	-0.996012	0.0153301	-0.753197	0.129245	15.993	16.8765	16.3345	10.3161	13.0158	10.6788	9.03374	34.3777	21.3771	20.7277	24.9462	18.1583	ENSMUSG00000087804	downstream	10272	Gm23434
chr1	99095543	99095930	388	-0.390755	0.920262	-0.70701	0.746185	-1.34904	0.000175254	-1.6653	2.81113e-05	27.8847	19.2273	12.0404	9.52608	18.0285	17.2567	14.752	62.4828	60.2765	42.802	39.4228	28.6415	ENSMUSG00000087804	downstream	150355	Gm23434
chr1	100738864	100738961	98	0.46938	0.91025	-0.177166	0.995158	0.388209	0.501552	-0.258337	0.748696	142.713	103.085	84.3396	111.161	123.972	262.502	116.812	152.234	109.806	79.861	69.3699	213.453	ENSMUSG00000100977	downstream	156983	NA
chr1	101834877	101835345	469	0.246886	0.968647	-0.00122788	0.99991	-0.167421	0.776304	-0.415535	0.506463	20.2555	18.5577	9.96094	21.9834	21.9797	17.2819	14.7468	27.4363	15.9083	19.9434	27.858	15.332	ENSMUSG00000099375	upstream	12061	NA
chr1	101901732	101902581	850	-0.0334955	0.995667	0.0265581	0.996961	-0.319187	0.384041	-0.259133	0.591587	13.9703	21.3932	15.0086	13.274	19.0577	17.8273	16.2735	19.9651	20.5936	16.2816	21.4945	25.3789	ENSMUSG00000099375	upstream	78916	NA
chr1	102628174	102628330	157	0.117409	0.98866	0.103469	0.996879	0.378536	0.442277	0.364596	0.567081	102.528	90.0848	106.435	164.795	77.384	105.496	83.5477	80.7715	74.0248	60.7921	54.1262	145.729	ENSMUSG00000099989	upstream	241527	Gm20281
chr1	105168849	105169431	583	0.0992404	0.991026	0.488865	0.978743	1.87228	3.11609e-05	2.2619	5.68407e-05	28.5158	18.9278	26.8133	18.3521	24.6282	45.3345	18.8174	8.63663	1.96885	5.72989	6.7414	10.0914	ENSMUSG00000099702	upstream	2719	NA
chr1	105179419	105179790	372	-0.252307	0.970331	0.244939	0.991881	1.3282	0.00518385	1.82544	0.00134543	34.0496	25.4857	21.7355	15.6881	16.8245	34.1032	25.6442	10.0262	5.39979	7.95363	6.28198	14.9367	ENSMUSG00000099702	downstream	7033	NA
chr1	105355629	105357030	1402	-0.24888	0.933144	-0.302968	0.974375	0.549138	0.0689543	0.495049	0.193852	26.1626	25.3862	29.6049	16.3729	19.826	32.6762	23.3047	22.3465	16.1697	13.8877	13.4862	20.2824	ENSMUSG00000119902	downstream	21582	NA
chr1	105463958	105464463	506	-1.31361	0.65406	0.027763	0.999855	0.405709	0.668809	1.74708	0.0336413	17.2098	5.52881	19.1753	7.68904	6.9121	5.57155	1.8853	3.68552	4.53692	2.26348	3.77867	7.75138	ENSMUSG00000100672	downstream	27388	NA
chr1	105663071	105664406	1336	0.146473	0.942441	-0.133807	0.983547	0.0765887	0.771436	-0.203691	0.457669	64.7859	64.9138	84.0569	73.969	71.9235	78.0767	92.1117	85.4268	78.9356	77.798	79.0309	66.7889	ENSMUSG00000104044	downstream	22419	NA
chr1	105695698	105695889	192	0.130947	0.991026	0.155682	0.996739	-0.0957956	0.918948	-0.0710601	0.954231	10.9952	8.09484	31.8183	15.1979	18.2163	23.8604	18.6321	20.397	15.6931	20.8783	18.8103	20.4281	ENSMUSG00000101330	downstream	3299	NA
chr1	105718355	105718615	261	0.330157	0.967337	0.0677878	0.996879	-0.201841	0.793806	-0.464209	0.582784	13.1437	15.4825	13.0802	10.4347	26.8009	20.2529	12.7926	25.7224	13.1936	16.0901	27.2679	16.2799	ENSMUSG00000026321	inside	9912	Tnfrsf11a
chr1	105780499	105780681	183	-0.917611	NA	0.307114	0.995158	-0.320512	0.779005	0.904213	0.4251	24.5138	11.8901	19.6372	11.6932	2.0118	21.1825	6.51614	6.11433	13.3288	11.9956	6.96542	19.6467	ENSMUSG00000102690	downstream	34682	NA
chr1	105891140	105891322	183	0.349528	0.949912	-0.361159	0.980014	0.358393	0.534367	-0.352294	0.630477	27.3978	37.369	34.365	37.2057	33.1948	32.7366	66.4646	33.6288	50.9629	20.862	35.988	46.4377	ENSMUSG00000099448	upstream	7100	Gm18801
chr1	105906489	105906783	295	0.654044	0.747735	-0.282949	0.983547	0.192872	0.706476	-0.744121	0.12452	32.2028	21.074	32.8906	30.3339	53.04	33.4482	61.4417	54.3658	41.3418	44.0011	43.2092	27.6991	ENSMUSG00000099843	downstream	297	Gm7160
chr1	105925286	105926222	937	0.240286	0.931075	-0.161201	0.987381	-0.525801	0.0499481	-0.927288	0.00180856	27.0362	23.7195	15.7244	20.346	28.2898	30.8397	25.198	41.5964	42.11	33.0029	37.0702	43.2544	ENSMUSG00000038866	inside	7150	Zcchc2
chr1	105965259	105965416	158	1.42489	NA	0.491586	0.990735	2.34129	0.00278142	1.40798	0.277746	6.68061	10.8204	7.96051	23.3932	20.9712	31.2253	18.1132	7.08179	0	3.62444	4.70606	6.20601	ENSMUSG00000102501	downstream	34898	NA
chr1	105971652	105972617	966	-0.146983	0.979462	0.145456	0.993929	-0.201679	0.677101	0.0907598	0.896997	21.3074	12.2277	8.37019	10.8745	14.6731	10.9441	12.838	13.3205	12.4765	16.2037	13.6352	12.5191	ENSMUSG00000102501	downstream	27697	NA
chr1	105990051	105991587	1537	0.200108	0.914451	-0.0904157	0.993049	0.0386844	0.904781	-0.25184	0.397551	71.2505	75.5364	94.6915	73.6617	96.651	99.0481	101.324	105.195	86.8163	92.7113	103.044	73.3658	ENSMUSG00000102501	downstream	8727	NA
chr1	105993932	105994112	181	-0.0617677	0.992866	-0.141559	0.994826	-0.147852	0.776152	-0.227644	0.703723	78.7279	77.2811	84.3801	62.3364	91.5315	109.03	47.4346	104.062	84.0271	83.8427	112.678	52.3682	ENSMUSG00000102501	downstream	6202	NA
chr1	106043137	106043997	861	-0.124227	0.973902	0.0332352	0.996879	-0.557786	0.0246943	-0.400324	0.226936	34.0199	34.8388	31.5118	21.4641	33.5663	34.3805	34.0701	50.0332	38.4947	42.3455	51.199	41.3782	ENSMUSG00000097612	downstream	24392	NA
chr1	106171217	106172889	1673	0.0348161	0.992084	-0.145845	0.982987	-0.105542	0.676353	-0.286203	0.266709	98.7397	82.4948	95.4785	77.2084	97.9267	91.6283	110.906	122.281	102.572	103.259	113.08	87.3293	ENSMUSG00000103291	downstream	19222	NA
chr1	106231462	106232049	588	0.329502	0.962952	-0.0240966	0.998714	0.675382	0.222592	0.321784	0.701156	10.7708	7.13668	11.9176	13.2335	12.2094	13.7844	10.5455	11.4176	4.63627	4.38262	8.49058	11.6732	ENSMUSG00000103291	downstream	79467	NA
chr1	106241926	106242410	485	-0.239122	0.970882	-0.349321	0.980361	-0.201952	0.753954	-0.31215	0.665754	20.1314	12.1773	13.3371	11.2307	11.3864	16.7118	12.2933	17.6874	19.5251	13.7754	8.3226	24.261	ENSMUSG00000100247	downstream	85498	NA
chr1	106279961	106280740	780	-0.0387173	0.995001	0.442983	0.927428	0.216906	0.577668	0.698606	0.0688974	24.6969	20.5235	17.5073	17.9569	19.352	23.0416	21.0972	12.9107	12.6925	15.9073	14.5716	23.4661	ENSMUSG00000100247	downstream	47168	NA
chr1	106317100	106317209	110	-0.122252	NA	-0.270253	0.995158	0.477363	0.611493	0.329363	0.79065	31.1863	24.0196	14.7011	21.2217	23.4284	22.4255	17.3448	25.4301	11.7393	23.4271	10.6223	8.91409	ENSMUSG00000100247	downstream	10699	NA
chr1	106395640	106395779	140	0.282802	0.969033	0.328752	0.98544	0.0224938	0.977738	0.068444	0.945526	43.3524	18.8725	29.5189	43.0751	35.5012	32.7229	32.3666	27.9731	28.696	33.4053	31.8668	44.3582	ENSMUSG00000099604	downstream	28040	Gm6651
chr1	106400908	106401535	628	-0.181775	0.97077	-0.403763	0.96417	0.700397	0.0541091	0.478409	0.325303	38.238	20.2938	26.6087	21.9933	19.0529	25.8128	32.6595	21.3807	18.9631	15.502	11.671	19.7775	ENSMUSG00000099604	downstream	33308	Gm6651
chr1	106477856	106478329	474	1.22893	0.559187	-0.230103	0.989596	-1.26478	0.00345515	-2.72381	2.46669e-07	6.12389	1.96735	3.41165	9.43935	8.15545	10.4084	6.03774	20.4585	26.9404	21.7466	22.1857	15.8598	ENSMUSG00000098344	upstream	3495	Mir3473f
chr1	106511679	106511973	295	0.30429	0.94405	-0.22936	0.988934	-0.0861411	0.883706	-0.619791	0.224928	19.6795	19.4935	37.7633	23.7396	37.44	33.4482	33.1462	32.2402	46.6919	32.0302	35.2875	34.3469	ENSMUSG00000103348	downstream	20541	NA
chr1	106583251	106583741	491	-0.150593	0.978177	0.13027	0.995158	-0.40901	0.300322	-0.128147	0.839687	28.4844	22.1578	30.7396	16.2441	31.1174	28.7088	21.8576	34.183	25.131	24.8814	34.398	39.2752	ENSMUSG00000103348	upstream	48651	NA
chr1	106628850	106630456	1607	-0.022684	0.995667	0.0688078	0.995219	-0.608873	0.00124946	-0.517381	0.0299201	32.8418	34.8174	33.7669	31.1107	35.9684	25.657	39.7732	50.5964	46.3387	50.3648	55.9867	45.3563	ENSMUSG00000057329	inside	11548	Bcl2
chr1	106640610	106640871	262	-0.0673393	0.993015	-0.052562	0.996879	-0.458545	0.331542	-0.443768	0.454534	27.1942	36.1858	19.2024	17.8198	33.022	20.1756	33.68	36.3009	38.882	30.6002	39.3267	39.9206	ENSMUSG00000057329	inside	1133	Bcl2
chr1	106643255	106643396	142	-0.0610071	NA	-0.149265	0.996879	-0.0601627	0.959508	-0.14842	0.916532	27.8751	12.0397	11.3882	21.9192	12.9634	4.96338	21.8336	13.1329	23.2398	10.7542	17.9531	23.0176	ENSMUSG00000057329	upstream	1251	Bcl2
chr1	106651411	106651652	242	-0.2422	0.974705	-0.405115	0.978918	0.149076	0.847034	-0.0138402	0.989026	20.7182	18.6248	15.5921	15.2732	15.9739	13.1058	16.7535	13.8709	22.5299	11.0431	14.4849	17.5581	ENSMUSG00000057329	upstream	9407	Bcl2
chr1	106694279	106694716	438	-0.109662	0.985118	-0.0491508	0.996879	-0.160948	0.726594	-0.100436	0.872723	25.9064	28.7422	31.9978	21.7628	34.8828	32.1827	19.0575	28.9524	33.0856	34.4294	29.5871	24.6257	ENSMUSG00000009905	upstream	6822	Kdsr
chr1	106702798	106703424	627	-0.119319	0.985118	-0.0468342	0.996879	-0.421268	0.313328	-0.348783	0.522101	13.0469	19.8304	12.8957	15.513	10.5692	12.3649	18.2577	23.1994	16.2474	18.8756	16.9414	21.8943	ENSMUSG00000009905	upstream	15341	Kdsr
chr1	106708753	106709141	389	-0.473777	0.85469	-0.627974	0.804454	-0.0794961	0.887349	-0.233692	0.67412	24.4212	31.1641	21.7094	17.0028	18.9285	16.3064	22.0711	30.6817	30.2452	18.6471	18.2954	23.5265	ENSMUSG00000009907	inside	15317	Vps4b
chr1	106713833	106714818	986	0.0823594	0.981524	0.0123703	0.99854	-0.0951002	0.752178	-0.165089	0.631177	54.8644	49.4951	60.1363	54.4533	57.8751	51.1088	68.2093	61.4689	61.4084	64.8552	72.0719	46.7402	ENSMUSG00000009907	inside	9640	Vps4b
chr1	106758790	106760209	1420	-0.16491	0.91025	-0.164741	0.974375	-0.161418	0.408611	-0.161249	0.511882	72.2894	71.3623	68.9617	58.3598	57.1685	68.2465	69.8677	83.3939	75.1755	69.4319	74.281	67.9019	ENSMUSG00000067006	upstream	28694	Serpinb5
chr1	106796152	106796965	814	0.0857544	0.980478	-0.0323591	0.996879	-0.0975108	0.746935	-0.215624	0.508262	66.1331	69.5003	75.2714	64.7645	68.9735	88.3165	78.2273	87.287	76.323	91.457	85.9959	59.4273	ENSMUSG00000067006	inside	7249	Serpinb5
chr1	106821986	106822647	662	-0.293067	0.90908	-0.253918	0.978771	0.184908	0.628522	0.224056	0.619028	28.3018	23.2427	28.7705	19.6883	26.1383	20.2284	20.5347	23.3813	22.324	19.0311	16.848	22.7116	ENSMUSG00000083613	upstream	5359	NA
chr1	106875199	106876258	1060	0.375128	0.929519	0.18901	0.989596	-1.72797	1.96112e-07	-1.91409	1.7887e-06	5.47684	5.27845	2.54264	5.1386	6.42544	7.97887	3.59986	18.1209	15.0248	18.6385	17.8374	20.351	ENSMUSG00000059956	inside	8552	Serpinb12
chr1	106882861	106884252	1392	0.071762	0.98981	-0.217258	0.978918	-0.32377	0.293644	-0.612789	0.0619599	14.9762	13.7333	10.7137	11.18	17.1914	12.6581	13.7064	21.3013	18.7596	15.153	19.1536	17.3756	ENSMUSG00000059956	inside	558	Serpinb12
chr1	107481675	107481784	110	0.296328	NA	-0.307556	0.993929	0.30915	0.777196	-0.294734	0.832129	7.19684	18.3679	21.2349	17.6848	11.7142	35.24	17.3448	25.4301	14.348	21.6917	8.69094	17.8282	ENSMUSG00000092572	downstream	4674	Serpinb10
chr1	107489486	107489900	415	-0.289454	0.968377	0.541285	0.936483	-2.35918	3.08116e-09	-1.52844	0.0016438	9.53798	8.9882	8.65928	7.0313	11.0892	6.79326	4.02273	30.5569	21.7813	30.358	47.6082	35.4416	ENSMUSG00000026315	upstream	27836	Serpinb8
chr1	107502037	107502406	370	0.00896573	0.998874	-0.121824	0.995219	-0.0560371	0.922842	-0.186827	0.761726	33.5204	17.6424	28.6517	23.6594	24.8757	24.7633	32.2285	32.2572	27.5327	30.1808	22.68	30.0349	ENSMUSG00000026315	upstream	15330	Serpinb8
chr1	107537229	107537757	529	0.307271	0.947881	0.38657	0.974375	-0.790094	0.0407423	-0.710794	0.160283	13.4686	10.2831	18.002	15.4449	24.3584	11.9909	15.7792	26.0871	19.5285	26.883	38.1518	22.861	ENSMUSG00000026315	inside	457	Serpinb8
chr1	107589680	107590604	925	-0.0745263	0.98866	-0.274034	0.973622	-0.789337	0.00120451	-0.988845	0.000519547	44.2184	32.2604	37.8785	22.713	46.3683	39.2402	36.0959	81.8528	68.8705	60.9807	67.4083	57.9496	ENSMUSG00000086161	upstream	24134	Gm15389
chr1	107638053	107638755	703	0.638986	0.830362	0.295255	0.981397	-1.85537	4.47777e-07	-2.1991	1.07416e-06	9.75959	4.20057	2.5559	6.36451	7.33178	9.02305	10.1774	21.7524	26.1244	23.8948	28.7088	36.7299	ENSMUSG00000086161	downstream	16809	Gm15389
chr1	107717250	107718304	1055	0.134937	0.982364	-0.108943	0.995219	-1.54209	1.91834e-07	-1.78597	2.47004e-07	9.25471	8.24983	6.6422	5.71612	12.7373	6.68057	9.49441	30.7571	24.48	22.617	26.5808	27.8829	ENSMUSG00000119815	upstream	32812	NA
chr1	107821952	107822439	488	0.2792	0.966628	-0.409976	0.965757	-1.50396	5.94522e-05	-2.19314	3.05866e-07	4.86672	7.00668	11.4141	8.37128	12.0708	6.49918	10.7516	36.3039	36.1641	21.3183	31.562	29.4701	ENSMUSG00000077237	downstream	1117	Gm22438
chr1	108019661	108020214	554	0.366913	0.952372	-0.487124	0.961901	-0.613899	0.229753	-1.46794	0.00491842	8.09753	5.89141	3.89199	6.6717	6.97777	6.99712	9.47075	17.8408	14.5034	9.47545	11.696	14.1596	ENSMUSG00000099484	upstream	128624	NA
chr1	108050737	108051624	888	-0.754547	0.61733	-0.792113	0.611351	-0.890354	0.0133682	-0.92792	0.0226482	20.8017	15.5771	10.5218	7.01018	10.5722	7.93694	11.0114	32.9713	26.0139	13.5427	15.3114	23.5568	ENSMUSG00000099484	upstream	159700	NA
chr1	110483526	110483799	274	-0.364653	0.968077	1.52661	0.691888	0.416319	0.614289	2.30758	0.00350208	33.7078	9.64291	41.3133	5.67978	20.8266	33.4394	28.7233	6.12549	5.2365	20.5517	13.5686	14.3146	ENSMUSG00000099926	upstream	43952	Gm6693
chr1	110796134	110796327	194	-1.26851	0.654142	1.15975	0.936598	1.25699	0.0915015	3.68525	2.25626e-05	59.85	28.841	57.4235	10.0275	30.3637	32.6969	8.60533	3.8451	3.69794	6.39571	14.7836	1.68479	ENSMUSG00000102788	downstream	89234	NA
chr1	111322094	111322764	671	0.762129	0.691898	-0.0253255	0.998184	-0.824171	0.0306337	-1.61163	0.000179867	15.3375	8.10691	8.83672	11.8865	28.531	17.8563	12.7953	36.686	27.798	25.7456	33.7189	36.046	ENSMUSG00000101846	downstream	7666	NA
chr1	111336848	111338341	1494	0.299531	0.940885	-0.217132	0.986975	-1.08433	0.000742744	-1.60099	1.6051e-05	6.71191	5.40956	4.69044	3.77607	8.99454	6.36868	8.14125	19.847	13.9255	15.2045	13.7933	14.4392	ENSMUSG00000101846	downstream	22420	NA
chr1	111742839	111743466	628	-1.03335	0.733469	0.536915	0.980508	0.531056	0.50268	2.10132	0.00493224	9.24435	5.44468	14.0196	4.95624	3.22433	6.73376	4.17738	2.67259	1.82777	3.34357	2.19888	4.68415	ENSMUSG00000100555	upstream	7334	NA
chr1	111763066	111763175	110	0.0411978	NA	0.569587	0.98867	1.33657	0.115511	1.86496	0.09177	21.5905	14.1292	21.2349	22.9902	20.0815	16.0182	17.3448	5.08601	5.21746	6.94135	7.72528	8.91409	ENSMUSG00000102728	downstream	1112	NA
chr1	111857767	111858275	509	-0.197224	0.975733	-0.690412	0.866133	0.113128	0.865202	-0.38006	0.560028	18.1453	10.9924	22.9454	12.6121	10.4879	17.3085	20.6161	28.5776	16.6313	13.8759	11.4779	17.3378	ENSMUSG00000101875	upstream	48729	Gm6028
chr1	111864101	111865361	1261	0.022168	0.995667	-0.159027	0.983677	-0.0655551	0.84404	-0.24675	0.454499	130.791	102.546	124.394	85.7733	114.01	155.66	129.931	156.762	126.071	129.352	137.643	111.974	ENSMUSG00000101875	upstream	55063	Gm6028
chr1	112451667	112451898	232	0.509625	0.931075	-0.354877	0.986975	0.226807	0.774781	-0.637695	0.434631	11.3743	8.03902	13.9407	12.5775	20.6297	13.6707	15.4197	21.7033	12.9874	13.1646	14.1935	12.6795	ENSMUSG00000088691	downstream	55891	Gm22331
chr1	112947573	112947835	263	-0.278789	NA	0.341693	0.989573	-1.83772	0.00368551	-1.21724	0.137106	9.03026	5.90954	5.46555	7.39668	7.69917	5.3597	0.906808	19.1451	12.0021	18.1452	16.9633	24.8555	ENSMUSG00000100304	upstream	52912	NA
chr1	113284109	113284470	362	-0.481615	0.894675	-0.798724	0.791449	-0.0324181	0.964539	-0.349527	0.594514	27.7006	27.4777	17.3724	10.7477	26.951	11.6818	18.4468	30.9095	30.5193	18.9833	14.0848	20.7667	ENSMUSG00000101453	downstream	66014	NA
chr1	113800353	113801112	760	0.371599	0.94065	-0.682634	0.870779	-0.0981496	0.884333	-1.15238	0.0252047	9.37483	9.61156	9.22042	5.37524	9.93064	19.9384	14.7488	20.8571	20.9557	9.66995	11.7404	18.9229	ENSMUSG00000097648	downstream	18003	NA
chr1	113916975	113917674	700	-0.138924	0.97802	-0.330475	0.956385	-1.8053	7.28431e-12	-1.99686	4.34582e-11	15.4561	17.3183	15.6578	12.5057	17.8821	10.572	17.035	70.5987	58.8269	54.9483	61.0021	35.9535	ENSMUSG00000097648	upstream	25111	NA
chr1	113926117	113926553	437	-0.299327	0.957762	-0.768203	0.793586	-0.363849	0.489334	-0.832725	0.109189	25.9657	17.7827	25.9035	10.2386	21.9043	10.4833	31.6532	46.9419	35.4596	26.2088	25.7657	19.4464	ENSMUSG00000097648	upstream	34253	NA
chr1	113928885	113929314	430	-0.232832	0.962039	-0.0929771	0.995219	-1.35029	4.35664e-06	-1.21044	0.000449641	21.4789	21.6866	16.7144	14.0244	21.8328	13.1126	17.7481	48.5734	43.7114	42.6167	45.4534	41.0463	ENSMUSG00000097648	upstream	37021	NA
chr1	113963324	113963728	405	0.0869623	0.991829	-0.141233	0.995219	-1.08183	0.0099482	-1.31003	0.00767882	12.3798	14.199	11.535	9.60655	16.8172	12.1817	15.3105	33.1533	30.1131	28.9866	39.604	14.5267	ENSMUSG00000097648	upstream	71460	NA
chr1	114039466	114039812	347	-0.309047	0.967887	-0.556492	0.973622	0.189281	0.808644	-0.0581637	0.957158	24.3351	19.7076	26.4083	12.8941	26.5245	8.1245	26.8044	27.4088	21.5014	25.855	15.612	5.65158	ENSMUSG00000097648	upstream	147602	NA
chr1	114092390	114093094	705	0.549275	0.828879	-0.351458	0.973622	-0.779863	0.0300813	-1.6806	2.05961e-05	8.23468	6.3932	7.13623	7.17425	10.1832	9.99717	14.8845	23.0133	22.9975	17.1934	19.8885	16.6902	ENSMUSG00000097648	upstream	200526	NA
chr1	114164197	114164724	528	0.617624	0.894675	0.209644	0.993929	-1.14984	0.0277764	-1.55782	0.012818	10.4954	7.65331	2.72242	5.52649	9.76182	21.3576	6.7753	22.2513	17.935	20.7879	30.1769	17.952	ENSMUSG00000097648	upstream	272333	NA
chr1	114176148	114176337	190	-0.10902	0.99194	0.0843433	0.996879	1.1237	0.0814781	1.31707	0.0937523	29.1661	21.2681	32.1533	16.3817	23.2522	51.9327	13.8074	9.81512	12.0825	7.03269	13.9767	15.4824	ENSMUSG00000097648	upstream	284284	NA
chr1	114391987	114392365	379	0.382598	0.940885	0.0678463	0.996879	1.07503	0.028218	0.760279	0.265079	20.1917	14.3529	18.0154	15.9116	20.8851	41.8417	14.473	12.7933	7.95009	11.0805	8.96866	12.936	ENSMUSG00000097648	upstream	500123	NA
chr1	114673643	114674503	861	-0.225263	0.964209	-0.186698	0.986975	-1.72405	1.3114e-09	-1.68549	2.23466e-07	9.19457	11.5528	8.76488	8.35971	8.97952	7.77654	8.58677	31.1895	32.4955	28.9324	33.6803	19.7401	ENSMUSG00000101687	downstream	472417	Gm4854
chr1	114938277	114938753	477	-0.244027	0.97444	-0.188705	0.994038	-1.58041	0.000597951	-1.52509	0.00578128	11.0643	23.4598	7.15707	9.37998	22.3829	5.91028	8.49967	45.3512	35.7949	34.2156	42.3109	29.4645	ENSMUSG00000101687	downstream	208167	Gm4854
chr1	115784889	115785206	318	-0.640553	0.881611	-0.192608	0.993479	-1.75384	0.00026876	-1.30589	0.0220097	16.5965	15.1511	7.91044	3.67043	15.0506	6.64906	7.49971	32.2541	32.4861	30.3139	30.063	23.6401	ENSMUSG00000070695	inside	172403	Cntnap5a
chr1	115786491	115786703	213	-0.10249	NA	-0.0380969	0.998276	-0.631931	0.407759	-0.567537	0.557752	16.1056	6.56708	10.1228	13.6995	6.04958	8.27231	11.1967	12.2574	18.8612	16.5794	14.9609	13.8106	ENSMUSG00000070695	inside	174005	Cntnap5a
chr1	115808823	115809665	843	-0.31262	0.940885	-0.214186	0.989566	-1.06312	0.00245546	-0.964688	0.0228929	18.1557	10.5089	9.8046	12.2304	8.51616	14.2131	6.22395	26.9887	22.2964	21.172	17.6408	25.5897	ENSMUSG00000070695	inside	196337	Cntnap5a
chr1	115965015	115965310	296	-0.233397	0.967337	-0.500588	0.964934	1.7271	1.04349e-05	1.45991	0.00178848	54.3815	35.1797	55.8465	24.9738	41.6668	60.7176	39.4799	20.7908	14.5419	11.608	13.9955	11.0422	ENSMUSG00000070695	inside	352529	Cntnap5a
chr1	115990202	115990537	336	0.233727	0.969197	-0.307355	0.978918	-0.347703	0.46893	-0.888785	0.0634076	24.3465	16.6522	18.1819	12.7373	31.2279	25.1714	22.7134	34.4113	37.5781	28.974	25.6072	34.0469	ENSMUSG00000070695	inside	377716	Cntnap5a
chr1	116276816	116277171	356	-0.178044	0.984078	-0.477743	0.974375	-0.75782	0.153338	-1.05752	0.0747608	24.4612	22.7019	8.07551	12.0217	13.4441	30.6865	10.7187	37.7165	38.2883	24.9333	35.507	20.1986	ENSMUSG00000102033	upstream	284336	NA
chr1	118310857	118311737	881	0.0767502	0.981988	-0.14604	0.983547	-0.247859	0.268139	-0.470649	0.0495957	48.5235	48.3375	51.1915	50.3444	51.1914	54	53.0581	71.1234	65.7957	71.8265	61.8527	49.3428	ENSMUSG00000064302	upstream	5051	Clasp1
chr1	118321584	118322263	680	-0.220608	0.920262	0.0566591	0.996879	-0.403219	0.0912677	-0.125952	0.74379	48.5081	39.0838	41.2207	33.4711	37.6281	30.5759	44.1909	47.4445	45.7871	49.8272	48.1126	47.1048	ENSMUSG00000064302	inside	4796	Clasp1
chr1	118359142	118359586	445	-0.485368	0.899571	0.0427107	0.996879	0.209441	0.747006	0.737519	0.225534	22.5339	17.8123	16.5548	10.9288	13.2372	18.2139	12.3265	13.4103	9.3504	7.5068	10.7416	19.0968	ENSMUSG00000077257	downstream	21499	Gm26080
chr1	118368582	118369351	770	-0.216657	0.940885	0.323299	0.974375	1.76326	1.8035e-11	2.30321	9.12511e-13	40.4394	33.91	52.7373	44.212	32.5128	38.4437	30.6631	7.75012	9.3169	10.2881	10.4843	11.8855	ENSMUSG00000077257	downstream	11734	Gm26080
chr1	118388231	118390416	2186	0.312567	0.75332	0.0911737	0.990887	0.318053	0.109459	0.0966601	0.770082	28.4889	28.1549	27.7	37.8208	33.2624	31.5967	36.6573	29.6025	23.1039	29.9517	29.4955	23.7736	ENSMUSG00000107722	upstream	1234	2900060B14Rik
chr1	118435106	118435489	384	0.0579469	0.993006	-0.726093	0.707948	0.321785	0.453697	-0.462255	0.331859	24.0519	25.4988	25.7354	24.3166	23.01	34.8729	24.2217	41.2797	28.3971	18.1442	20.1934	26.3863	ENSMUSG00000100770	upstream	27785	NA
chr1	118458788	118459821	1034	0.0956917	0.97077	-0.162603	0.978743	-0.0601241	0.820441	-0.318419	0.174612	60.4841	56.8173	55.4332	56.4408	58.2149	59.3014	71.9624	73.2242	70.2137	65.4444	67.6989	57.8467	ENSMUSG00000100770	upstream	51467	NA
chr1	118476960	118477135	176	-0.244446	0.974768	-0.720734	0.924351	0.1807	0.815069	-0.295588	0.726588	31.4862	37.0891	27.5645	15.4742	35.5609	12.0136	43.3619	46.6218	32.6091	27.1147	20.5203	24.1423	ENSMUSG00000100770	upstream	69639	NA
chr1	118498424	118498580	157	-1.00643	0.747735	-0.249191	0.993049	-0.821433	0.213957	-0.0641943	0.95576	38.6582	21.7787	38.9116	17.3469	25.7947	0	18.2286	41.5736	27.4166	27.9644	31.1225	27.064	ENSMUSG00000026380	upstream	57095	Tfcp2l1
chr1	118627833	118628425	593	0.284905	0.96896	0.286633	0.989573	0.277814	0.672381	0.279542	0.74439	20.0249	7.0765	10.9081	17.3866	13.0377	12.4796	17.2936	12.5792	7.98456	9.17418	8.23986	22.0472	ENSMUSG00000088363	downstream	18153	LOC115487679
chr1	118759702	118759844	143	0.220582	0.976751	-0.159658	0.995219	0.475578	0.429659	0.095338	0.9247	29.5255	26.0846	36.4386	39.4507	20.5964	49.2867	36.6909	26.0821	31.1041	29.3673	20.7988	27.428	ENSMUSG00000100040	downstream	21519	NA
chr1	118825303	118826165	863	-0.0437483	0.993449	-0.336109	0.952621	-0.699803	0.0100838	-0.992163	0.00129394	19.8754	28.6349	16.8645	20.7381	21.5436	15.9254	26.2533	38.8965	48.2147	36.7176	34.9562	31.4352	ENSMUSG00000098273	upstream	55785	Mir6346
chr1	118873633	118873898	266	0.170059	0.983297	0.826951	0.883015	0.868215	0.0804841	1.52511	0.0121135	20.833	23.3716	27.695	35.1036	16.6087	30.4707	26.8974	10.5162	6.47279	11.8407	13.178	22.1177	ENSMUSG00000098273	upstream	8052	Mir6346
chr1	118878315	118878809	495	-0.0857747	0.992914	0.530047	0.977334	1.35671	0.00888161	1.97253	0.00152167	29.3205	21.3508	30.1282	22.7937	16.3627	37.7317	25.5354	10.172	3.76817	8.67669	3.64805	19.8091	ENSMUSG00000098273	upstream	3141	Mir6346
chr1	118895518	118895658	141	0.288023	0.970368	-0.195046	0.995158	0.606902	0.328392	0.123832	0.907054	29.9443	29.7615	24.2122	45.5289	15.6664	37.4894	38.9027	22.4843	28.4925	21.661	19.5871	27.817	ENSMUSG00000098273	downstream	13488	Mir6346
chr1	118898401	118898731	331	-0.121902	0.990025	-0.904964	0.740389	-0.636729	0.242048	-1.41979	0.00776653	15.1474	15.0256	9.22828	14.1051	16.684	5.32327	10.0872	38.875	31.2102	13.5524	23.1058	19.7492	ENSMUSG00000098273	downstream	16371	Mir6346
chr1	118948452	118948671	220	-0.0911744	0.991829	0.3511	0.986055	0.808276	0.125803	1.25055	0.0411206	41.9816	38.1488	42.4698	32.7168	19.2447	73.6837	32.5214	19.4964	15.0002	17.7872	18.3475	32.685	ENSMUSG00000048402	inside	32678	Gli2
chr1	118954559	118955450	892	-0.148588	0.980806	0.142291	0.993929	-1.35669	5.91888e-05	-1.06581	0.0115886	18.6376	9.58313	9.66888	9.37769	7.42924	18.5682	10.6946	29.4784	22.5193	25.5729	28.5801	32.2453	ENSMUSG00000048402	inside	25899	Gli2
chr1	118976452	118977124	673	-0.298346	0.874848	-0.460222	0.794448	0.00342518	0.993677	-0.15845	0.695427	72.5387	60.0438	58.4694	38.155	46.4987	59.1697	64.1409	60.1303	81.2273	54.7418	47.8238	51.9657	ENSMUSG00000048402	inside	4225	Gli2
chr1	118981919	118983191	1273	-0.209666	0.930882	-0.129781	0.989573	-0.585111	0.00873723	-0.505226	0.0698343	27.3627	28.447	21.8778	25.3672	21.5459	21.5925	20.7953	36.4771	36.969	39.512	32.9599	26.9593	ENSMUSG00000048402	upstream	570	Gli2
chr1	119004119	119004291	173	-1.19027	NA	-0.387535	0.990735	1.14538	0.158144	1.94812	0.0194422	53.387	17.9677	29.0812	15.7425	7.44833	22.407	13.7856	9.70165	7.46429	4.96527	4.29802	13.2251	ENSMUSG00000097408	downstream	16541	NA
chr1	119022399	119022731	333	-0.0901515	0.98981	0.431681	0.94071	-0.450654	0.231173	0.0711786	0.917252	30.9054	31.7376	20.504	26.2882	24.3229	29.6313	24.3504	26.321	26.2832	35.8272	37.3215	32.3905	ENSMUSG00000097408	downstream	34821	NA
chr1	119025283	119026240	958	-0.124551	0.974705	0.402766	0.870779	-0.813915	0.000714619	-0.286597	0.447907	23.1381	29.8512	20.8189	28.0224	20.5601	21.3353	20.4136	30.1728	30.1039	38.4564	46.5694	33.4356	ENSMUSG00000097408	downstream	37705	NA
chr1	119033458	119034572	1115	-0.301302	0.866278	0.0890756	0.995158	-0.32765	0.225542	0.0627276	0.894356	62.0069	67.4652	46.5718	47.63	56.132	33.5017	51.976	55.1935	57.1347	68.5653	63.162	46.0228	ENSMUSG00000097408	downstream	45880	NA
chr1	119053356	119054372	1017	0.177175	0.94405	0.0106126	0.998714	-0.263761	0.304217	-0.430324	0.135651	34.7694	46.7638	29.3283	36.9172	44.8888	45.0462	41.2727	55.011	45.1462	50.2088	52.328	48.208	ENSMUSG00000096939	upstream	30944	Gm8321
chr1	119065020	119065433	414	-0.166698	0.979462	-0.241212	0.989573	0.30357	0.56961	0.229056	0.744001	22.3091	26.2789	18.2284	29.1329	13.3391	17.0242	19.5862	15.3154	22.5271	16.8294	12.8288	19.7373	ENSMUSG00000096939	upstream	19883	Gm8321
chr1	119108172	119109302	1131	0.165406	0.991241	0.381668	0.992281	1.28199	0.143743	1.49825	0.164274	17.2656	14.8413	14.9336	25.2841	12.8579	22.7456	9.48902	5.77105	5.32818	3.12238	2.53582	16.7615	ENSMUSG00000096939	downstream	21877	Gm8321
chr1	119115143	119115322	180	-0.602307	0.899571	-0.06111	0.996879	-0.779735	0.194833	-0.238538	0.793892	19.0583	25.9035	17.968	20.534	11.2493	7.83112	14.5744	26.937	23.1163	23.8609	24.1951	23.6058	ENSMUSG00000096939	downstream	28848	Gm8321
chr1	119129246	119129369	124	-0.535784	NA	-0.283662	0.993929	-0.830398	0.332792	-0.578276	0.600161	10.6405	32.5883	13.0413	9.41287	17.8142	2.84194	21.1564	22.5589	34.713	18.473	30.8388	21.0871	ENSMUSG00000100767	downstream	40323	Gm3508
chr1	119217060	119217944	885	-0.255063	0.944502	0.148255	0.990735	-1.36755	1.56329e-06	-0.964227	0.0061745	16.1014	12.2932	10.1514	11.8698	8.528	8.76023	13.2046	25.0757	24.4808	23.7261	25.9255	33.9776	ENSMUSG00000099860	downstream	15132	NA
chr1	119231779	119232012	234	0.195804	0.984078	-0.517605	0.963757	-1.22379	0.0137555	-1.9372	0.000437487	18.0434	9.96288	7.67863	10.8074	16.52	9.0359	15.2879	53.3959	34.9503	24.8806	28.1445	41.9038	ENSMUSG00000099860	downstream	1064	NA
chr1	119253274	119253725	452	0.425329	0.913282	0.0821999	0.996879	-1.17293	0.00237685	-1.51606	0.00100897	14.5954	13.4102	11.9257	9.03802	26.4717	10.9151	23.7435	40.0205	35.8701	43.4986	46.2961	28.9248	ENSMUSG00000099860	inside	838	NA
chr1	119300048	119300610	563	-0.125983	0.981024	0.237844	0.981282	-0.630095	0.0485056	-0.266268	0.586033	23.9043	19.3241	18.8297	13.8211	21.5796	21.2817	19.0623	22.193	27.014	25.9376	32.829	28.447	ENSMUSG00000101179	inside	12701	NA
chr1	119308822	119309353	532	-0.102468	0.98866	-0.337211	0.970404	-1.19222	0.000115034	-1.42696	5.39002e-05	16.8648	17.5287	13.172	14.9922	17.6468	15.8978	10.3107	48.725	36.6791	39.1104	32.945	27.6471	ENSMUSG00000037035	downstream	33842	Inhbb
chr1	119344105	119344371	267	-0.717259	0.758906	-0.147128	0.995158	-0.764797	0.0915318	-0.194665	0.787439	30.6382	32.0156	31.6291	8.74304	20.6832	34.3161	16.078	37.7165	34.3923	32.5295	33.0205	31.8281	ENSMUSG00000037035	inside	910	Inhbb
chr1	119420732	119421151	420	-0.215356	0.974705	0.130057	0.99616	-0.139899	0.83452	0.205514	0.795295	21.3621	18.8725	19.6792	16.6742	10.5189	31.8838	11.9245	14.2085	20.1556	17.7252	14.9217	25.6811	ENSMUSG00000101437	upstream	6056	Gm29454
chr1	119457565	119458477	913	-0.0307496	0.994181	-0.214932	0.974375	-0.285802	0.257926	-0.469985	0.0892859	31.2152	32.0034	26.9618	25.9945	28.227	27.4046	36.0479	42.8941	40.3882	34.7068	35.1361	38.3055	ENSMUSG00000084505	includeFeature	380	Gm25322
chr1	119504425	119505317	893	0.105485	0.969197	0.0635045	0.995219	0.0520548	0.85146	0.0100747	0.979498	91.9014	84.0631	115.092	90.84	114.406	110.495	102.287	97.3158	95.4392	105.383	103.011	92.6014	ENSMUSG00000101731	upstream	40530	3830432H09Rik
chr1	119525896	119526539	644	-0.00372686	0.999513	-0.0859929	0.993866	-0.0268652	0.935979	-0.109131	0.760175	77.854	73.6078	76.7267	60.7159	72.3172	81.5336	89.9895	85.425	78.6468	82.9944	80.1618	66.4866	ENSMUSG00000102687	downstream	31935	NA
chr1	119556998	119557772	775	0.122846	0.98981	0.463196	0.978743	0.783127	0.122975	1.12348	0.0670607	7.8314	7.62064	11.5923	12.8015	7.3632	10.0036	9.2319	5.0532	3.33244	4.92612	3.83772	9.70006	ENSMUSG00000102687	downstream	702	NA
chr1	119648053	119649232	1180	-0.195965	0.931824	-0.0268414	0.996879	-0.0388455	0.912406	0.130278	0.729133	30.6374	32.6647	34.261	25.7179	32.916	21.2037	32.944	30.5017	29.0608	29.5228	28.356	29.9151	ENSMUSG00000091876	upstream	66267	NA
chr1	119836898	119837914	1017	-0.0333985	0.991868	-0.0904365	0.990735	-0.293287	0.116861	-0.350325	0.116295	80.6962	80.6905	80.2111	64.6529	83.6234	91.825	75.9793	103.054	102.284	97.1329	101.836	89.3454	ENSMUSG00000036975	inside	1278	Tmem177
chr1	119878957	119879314	358	-0.134942	0.985118	-0.330917	0.978771	-0.53341	0.231815	-0.729385	0.146262	16.2163	23.4434	23.0874	19.0186	25.1953	19.6872	12.6573	30.213	39.6775	28.2598	34.7152	18.2598	ENSMUSG00000092245	upstream	35211	Gm17973
chr1	119912974	119913598	625	-0.135529	0.970331	-0.0142209	0.99854	-0.267485	0.353341	-0.146177	0.723051	45.177	43.7665	59.7975	34.8602	50.3643	42.8519	52.6587	53.1116	56.7034	58.1824	56.9353	46.5434	ENSMUSG00000092245	upstream	927	Gm17973
chr1	119997155	119997934	780	-0.183003	0.970331	-0.211868	0.987259	0.146996	0.759473	0.118131	0.848687	17.5923	17.7339	18.6591	15.7122	11.8	17.1682	19.2627	17.2142	16.0036	13.7047	10.4861	20.5329	ENSMUSG00000050777	inside	2048	Tmem37
chr1	120057023	120057204	182	-0.510789	0.952372	-0.324513	0.993866	1.62115	0.0318669	1.80743	0.0423373	40.5976	29.0347	48.3754	8.55088	30.3429	38.7253	34.0701	7.17258	14.9787	3.14649	4.08548	25.1423	ENSMUSG00000026388	inside	8106	3110009E18Rik
chr1	120073659	120074452	794	-0.105574	0.984703	-0.254195	0.978918	0.385498	0.271638	0.236877	0.629841	40.2141	31.7106	29.6449	19.3553	32.9211	44.8267	29.7362	30.5332	26.7444	19.4734	25.6861	27.5805	ENSMUSG00000026388	inside	24742	3110009E18Rik
chr1	120093647	120093776	130	0.26125	0.973902	-0.608973	0.970054	1.18997	0.030569	0.319748	0.723118	26.3884	37.0619	53.904	37.4101	41.064	54.2154	58.7054	37.2974	26.4887	21.2913	30.2326	5.02846	ENSMUSG00000026388	inside	22143	3110009E18Rik
chr1	120120137	120121541	1405	0.0541096	0.98866	0.0482169	0.996739	-0.219979	0.29114	-0.225872	0.39067	49.7718	53.8719	46.6784	50.5369	57.3858	51.167	48.8863	65.8346	51.6733	63.5838	63.9604	53.273	ENSMUSG00000026388	downstream	4218	3110009E18Rik
chr1	120136204	120136691	488	-0.0591134	0.992375	0.203687	0.990735	1.67248	1.22488e-07	1.93528	4.66398e-07	45.9634	46.1804	54.8613	45.4441	37.7213	59.2148	47.4049	11.0822	14.4068	12.5172	10.0128	25.4514	ENSMUSG00000026389	inside	17717	Steap3
chr1	120197245	120197461	217	-0.132097	0.985388	-0.265006	0.986975	0.123312	0.841942	-0.00959729	0.990962	37.6977	30.0815	39.7449	21.5151	27.9937	38.9751	43.9614	28.3598	42.9779	30.7883	29.8598	28.6182	ENSMUSG00000026389	inside	2974	Steap3
chr1	120207177	120207976	800	0.0162407	0.998113	0.332498	0.96401	-0.599018	0.0511518	-0.282761	0.544722	12.5345	13.0165	12.8022	12.4015	12.8856	14.977	11.9245	17.4832	13.81	18.1343	21.1117	19.611	ENSMUSG00000026389	upstream	6742	Steap3
chr1	120229721	120230089	369	0.407195	0.926791	-0.31557	0.983547	0.437545	0.403732	-0.28522	0.694537	20.7389	16.0054	15.0951	21.0875	18.4579	18.1453	32.9621	20.7208	20.9971	10.3462	16.9841	25.6874	ENSMUSG00000026389	upstream	29286	Steap3
chr1	120236533	120236744	212	-0.371045	0.943722	0.479427	0.978771	1.33324	0.00755739	2.18371	0.000267849	58.5026	26.3922	45.7676	28.4458	32.9955	34.9076	37.1235	7.91691	10.8287	9.45432	10.021	24.6679	ENSMUSG00000036907	upstream	31568	C1ql2
chr1	120247907	120248791	885	0.061839	0.98866	0.0836862	0.995158	0.31961	0.169662	0.341457	0.238876	69.7728	62.5196	57.66	70.3395	65.312	71.2764	57.13	46.5691	53.0147	56.7269	60.1328	39.1481	ENSMUSG00000036907	upstream	19521	C1ql2
chr1	120253578	120254111	534	-0.097216	0.984078	0.0976736	0.995219	0.347817	0.275031	0.542707	0.132366	66.2181	48.0233	41.0505	48.451	48.9501	58.0734	37.5154	32.4781	37.8852	32.7082	35.6065	47.13	ENSMUSG00000036907	upstream	14201	C1ql2
chr1	120258349	120259377	1029	-0.0744544	0.985118	-0.161295	0.983216	-0.397546	0.0762403	-0.484387	0.0644509	29.235	33.6821	26.1924	27.0342	30.7695	27.74	27.3488	43.4956	39.8789	37.3798	33.4462	41.9283	ENSMUSG00000036907	upstream	8935	C1ql2
chr1	120264828	120265596	769	-0.0997342	0.973902	0.00369749	0.999855	-0.507623	0.00918405	-0.404192	0.107411	57.9928	55.1755	52.5722	52.3644	47.8752	43.5345	61.4059	71.2968	74.6321	78.8123	74.1763	65.03	ENSMUSG00000036907	upstream	2716	C1ql2
chr1	120596538	120597006	469	-0.759295	0.850791	0.124507	0.996739	-2.65	3.61227e-08	-1.7662	0.00160171	10.6904	7.95331	6.51292	7.46607	8.24239	0.751386	1.52553	35.3888	21.109	35.8168	30.3493	25.0887	ENSMUSG00000099957	inside	21126	NA
chr1	120602001	120602535	535	0.77369	0.830719	0.21122	0.990887	-2.61207	8.10491e-10	-3.17454	1.61744e-09	9.37159	2.90506	1.3434	7.99947	11.0104	5.26954	3.56622	44.9661	30.8415	48.8814	45.6658	36.0451	ENSMUSG00000099957	inside	15597	NA
chr1	120644808	120645035	228	0.212587	0.987445	0.223029	0.994356	-1.59411	0.0079588	-1.58367	0.0335175	10.4165	8.18005	2.36421	5.11928	11.3032	6.18246	8.36809	21.2661	19.5083	20.0934	27.0215	24.3704	ENSMUSG00000101386	upstream	41137	NA
chr1	120715188	120715464	277	0.195027	0.984797	0.310853	0.989573	-1.02197	0.0673853	-0.906148	0.212944	11.4318	24.1267	13.622	16.8548	40.5375	7.63322	8.60977	30.2958	32.1147	37.9018	41.4153	36.5789	ENSMUSG00000101922	upstream	28765	NA
chr1	120757176	120759136	1961	-0.14464	0.949912	-0.000439203	0.99991	-0.396667	0.0391306	-0.252466	0.345602	42.5229	36.0615	45.172	29.3634	37.3605	40.7929	42.0794	46.8833	51.2168	50.2284	49.9967	46.669	ENSMUSG00000100761	upstream	3991	NA
chr1	120776981	120777220	240	0.594693	0.920262	-0.566397	0.97349	-0.785914	0.204096	-1.947	0.00245843	6.5971	7.12346	10.4813	8.10553	10.738	19.0883	12.9182	37.2974	25.7069	12.7258	28.326	23.1519	ENSMUSG00000100979	upstream	7183	NA
chr1	120795101	120795479	379	-0.875983	0.863913	0.79715	0.956385	-1.41086	0.0405747	0.262272	0.828329	11.1402	8.61172	7.11135	7.69918	1.9428	9.29816	1.25853	6.39666	8.32867	8.81405	12.0516	18.9728	ENSMUSG00000102360	upstream	1246	NA
chr1	120816190	120816692	503	0.0805641	0.990025	0.275189	0.983547	1.38478	1.78616e-05	1.5794	6.3415e-05	52.9867	31.8258	65.0134	41.7684	49.0392	68.6585	52.6291	22.6157	11.1247	18.5954	19.8507	22.743	ENSMUSG00000102360	downstream	16361	NA
chr1	120963877	120964426	550	-0.102487	0.98866	-0.206993	0.989573	-0.194868	0.674881	-0.299374	0.572122	23.0299	21.7589	21.2349	20.1607	20.0815	26.9106	15.6103	36.2802	18.2611	21.6917	24.914	23.7709	ENSMUSG00000097881	upstream	50708	Celrr
chr1	120974496	120975007	512	-0.136855	0.981273	-0.200758	0.986975	-1.43533	2.4889e-06	-1.49923	2.4757e-05	19.5852	16.0885	22.1091	11.3984	20.1338	24.7781	14.9057	63.7407	45.1178	50.518	51.8665	37.6643	ENSMUSG00000097881	upstream	40127	Celrr
chr1	121053815	121053984	170	0.321775	0.969197	-0.623435	0.964934	0.474222	0.499699	-0.470988	0.5876	15.5226	11.8851	27.4805	25.1748	22.7393	29.0212	15.4317	31.8125	19.412	17.4044	16.2458	15.3812	ENSMUSG00000097881	inside	38681	Celrr
chr1	121096549	121097087	539	0.133315	0.984078	-0.0420021	0.996879	0.077043	0.892628	-0.0982738	0.891065	23.0103	28.8351	15.0011	18.0457	16.7346	32.0364	32.7427	26.641	21.2958	22.8427	23.2547	23.6496	ENSMUSG00000101700	upstream	54918	NA
chr1	121111796	121113035	1240	0.14685	0.964131	0.00884158	0.999855	0.0589592	0.861595	-0.0790491	0.849897	34.688	34.4684	44.0506	45.0249	37.5583	42.3449	42.5052	44.2155	35.7543	49.3382	36.4926	33.4758	ENSMUSG00000101700	upstream	38970	NA
chr1	121153477	121153793	317	0.718952	0.822094	0.391218	0.980153	0.119898	0.871416	-0.207836	0.820576	14.984	9.80574	19.2717	13.5007	33.0996	22.2335	27.0841	19.4135	14.4838	18.065	32.1684	14.435	ENSMUSG00000101700	inside	1462	NA
chr1	121247658	121247900	243	-0.241219	0.98248	-0.829916	0.89783	-0.945033	0.156767	-1.53373	0.0263232	16.2891	9.59389	5.91539	10.4071	6.06025	8.70124	9.81443	33.7672	25.98	16.4964	9.61686	26.9012	ENSMUSG00000104253	upstream	7921	NA
chr1	121254113	121254428	316	0.870314	0.822094	-0.575065	0.966323	-0.324353	0.654394	-1.76973	0.00628106	4.17538	7.86942	4.54886	11.081	6.99038	15.6127	9.05661	20.6552	18.1621	12.0815	15.7989	10.3434	ENSMUSG00000104253	upstream	1393	NA
chr1	121280406	121280823	418	-0.173054	0.985118	-0.674881	0.870779	-1.61197	0.000405236	-2.1138	2.31473e-05	9.46953	5.57731	7.30756	3.72311	6.60575	6.7445	9.12883	36.1375	27.1171	14.8417	23.125	21.8943	ENSMUSG00000101791	downstream	2022	NA
chr1	121327351	121328316	966	0.0840695	0.980806	-0.0263574	0.996879	-0.229221	0.357735	-0.339648	0.235368	54.0881	61.9431	47.4311	46.5187	53.9282	71.5015	60.9805	72.2011	65.9474	71.4345	71.4748	59.2119	ENSMUSG00000026339	upstream	30462	Ccdc93
chr1	121329423	121329697	275	-0.211109	0.968666	-0.0363652	0.996999	1.52183	2.68193e-05	1.69657	9.6044e-05	57.5747	44.083	73.1788	38.1991	58.2363	42.288	61.5739	13.5627	21.9133	21.1711	13.5192	17.8282	ENSMUSG00000026339	upstream	29081	Ccdc93
chr1	121360564	121361029	466	-0.394911	0.891442	-0.183296	0.991907	1.31105	0.000223887	1.52266	0.000254468	42.4706	31.351	40.1003	33.8136	27.2565	31.0052	23.0302	18.8088	8.00533	13.5178	10.7134	9.81953	ENSMUSG00000026339	inside	1786	Ccdc93
chr1	121380105	121380492	388	-0.687288	0.85814	-0.0250652	0.999833	1.37121	0.015758	2.03343	0.00166102	21.0835	27.6393	52.7926	14.5398	13.7586	31.7887	25.816	7.69019	8.87506	14.5133	3.83277	5.05438	ENSMUSG00000026339	inside	21327	Ccdc93
chr1	121430212	121431850	1639	0.0451754	0.990025	-0.0935078	0.990735	0.0770818	0.767094	-0.0616015	0.857985	47.8179	46.3703	44.5089	41.6601	52.113	53.1073	44.235	47.5605	48.848	48.9156	39.0153	48.0603	ENSMUSG00000083582	downstream	3464	NA
chr1	121567575	121568337	763	-0.478279	0.707575	-0.0903772	0.995219	-0.426117	0.12336	-0.0382145	0.94115	57.7571	36.0544	57.6954	32.3796	32.5699	32.7922	46.5729	52.06	51.1489	49.7858	42.8789	53.5468	ENSMUSG00000102006	downstream	5059	NA
chr1	122212514	122213286	773	-0.249602	0.973902	-0.603239	0.956728	0.326932	0.625067	-0.0267048	0.980061	20.824	15.8839	14.1791	6.54314	11.4306	13.2207	25.9162	19.0588	15.406	10.0012	5.22181	20.296	ENSMUSG00000099960	downstream	32605	Gm28590
chr1	122357117	122357312	196	-0.368869	0.940885	0.242112	0.990735	-0.486512	0.353543	0.124469	0.884867	63.2784	81.6753	71.5053	92.3037	41.3241	61.1307	29.2029	57.0879	75.4003	55.0262	54.7372	133.408	ENSMUSG00000089274	upstream	80966	Gm24547
chr1	125370927	125371038	112	-1.03087	NA	-0.257249	0.995158	0.462928	0.614234	1.23655	0.148633	32.9855	34.6922	44.92	12.1583	18.0793	31.4643	14.9057	16.6506	15.3729	19.6	11.381	5.83661	ENSMUSG00000102063	upstream	1266	NA
chr1	125389747	125390390	644	-0.606776	0.876129	-1.44903	0.302382	0.48583	0.449824	-0.356422	0.653625	9.83419	7.48144	23.1575	6.64552	6.57429	7.66087	14.8131	20.2703	14.4817	5.92817	6.59768	6.5979	ENSMUSG00000102063	downstream	14612	NA
chr1	125434650	125436072	1423	0.144299	0.952037	-0.0421182	0.996879	0.142021	0.567475	-0.0443963	0.908896	74.9186	72.6317	103.793	82.9805	89.3882	99.8013	99.0499	91.8676	81.1676	88.1328	90.9946	71.6635	ENSMUSG00000026342	upstream	52260	Slc35f5
chr1	125473250	125473609	360	0.471189	0.891961	0.0186745	0.999591	0.635027	0.165331	0.182512	0.813425	19.0583	17.269	22.9591	16.7514	24.0327	29.3667	40.4109	18.1307	16.7394	21.2097	12.9828	19.0662	ENSMUSG00000026342	upstream	14723	Slc35f5
chr1	125508202	125509098	897	-0.175229	0.978885	0.396661	0.978197	0.249417	0.653123	0.821307	0.129849	18.5337	11.6089	17.8278	12.1447	9.23479	21.6076	14.3573	12.2662	5.91836	10.7467	8.76307	17.1259	ENSMUSG00000026342	inside	14459	Slc35f5
chr1	125542356	125542660	305	0.372668	0.94405	-0.115553	0.996611	-0.683602	0.15664	-1.17182	0.0289843	16.4387	13.7586	10.015	8.92937	21.1239	15.0203	23.4581	30.5717	29.1665	22.218	30.2996	31.0775	ENSMUSG00000101015	downstream	53065	NA
chr1	125560234	125561608	1375	-0.0179015	0.995667	0.111847	0.987259	0.14349	0.505488	0.273239	0.245684	106.705	105.686	139.562	108.938	112.858	123.02	119.505	100.228	94.123	105.3	115.956	92.4688	ENSMUSG00000101015	downstream	34117	NA
chr1	125607560	125607692	133	-0.47356	0.919828	0.232668	0.991335	-0.0396848	0.961301	0.666543	0.334136	37.6977	39.7317	40.5293	39.4916	22.145	23.8466	26.8974	22.4346	26.97	30.1401	27.9533	29.4902	ENSMUSG00000026343	inside	2828	Gpr39
chr1	125654170	125654597	428	-0.541452	0.90908	0.0764019	0.996879	0.409397	0.552518	1.02725	0.136443	22.8124	13.7991	14.6935	11.8174	8.17178	12.3505	14.4877	7.84292	8.71609	6.24397	5.21186	17.5644	ENSMUSG00000026343	inside	49438	Gpr39
chr1	125663065	125663643	579	0.00374108	0.999513	-0.136154	0.990735	-0.693287	0.0118818	-0.833182	0.0102588	38.7395	40.5329	32.8948	31.2462	51.5043	32.2577	33.7759	57.3311	75.5811	59.0135	73.3835	47.4186	ENSMUSG00000026343	inside	58333	Gpr39
chr1	125676800	125677366	567	0.120308	0.982364	-0.120673	0.995219	1.3426	9.14383e-06	1.10162	0.0035988	54.9177	54.274	53.2385	34.3091	47.3998	90.12	66.4577	24.3387	26.0643	19.5264	26.6025	23.6347	ENSMUSG00000026343	inside	72068	Gpr39
chr1	125687930	125688608	679	-0.339136	0.930882	-0.506011	0.893636	-0.906407	0.0107725	-1.07328	0.00708135	8.55	18.0829	10.585	9.74096	11.1153	10.38	8.78095	29.1129	24.3008	19.1168	18.7728	18.292	ENSMUSG00000026343	inside	83198	Gpr39
chr1	125701843	125702028	186	-0.479122	0.920262	0.489402	0.978918	1.11279	0.0422467	2.08132	0.00104375	36.887	33.4239	56.0293	38.6973	16.8245	35.9979	30.773	9.02357	10.7996	11.289	19.9881	8.78629	ENSMUSG00000026343	inside	97111	Gpr39
chr1	125759899	125760902	1004	-0.0661947	0.98866	-0.0434691	0.996879	-0.277664	0.272787	-0.254938	0.431289	36.5338	30.3411	27.0236	27.1261	32.4524	30.8877	28.5049	38.4491	35.8701	37.0747	39.4632	30.2759	ENSMUSG00000026344	downstream	34457	Lypd1
chr1	125912094	125912857	764	-0.261453	0.965794	0.0275795	0.998184	0.257574	0.642374	0.546606	0.355563	24.5233	9.9681	17.1684	9.93033	11.3243	21.2178	15.2959	12.2047	11.0803	10.7437	9.5934	16.2569	ENSMUSG00000104519	upstream	62395	NA
chr1	125925471	125925850	380	-0.0435236	0.995667	0.0170939	0.999855	1.84164	0.000938031	1.90226	0.00619417	15.2775	11.0431	18.9137	12.7982	9.20401	21.3295	16.3178	3.43529	4.53095	3.01401	3.63393	6.88105	ENSMUSG00000102723	downstream	72027	NA
chr1	125948046	125948371	326	0.0735825	0.991666	-0.48989	0.94071	0.489455	0.257367	-0.0740182	0.921933	31.569	29.5586	29.7629	21.4821	27.6685	35.6724	43.894	39.4712	24.6469	20.7868	26.3927	20.0521	ENSMUSG00000102723	downstream	49506	NA
chr1	125949054	125949460	407	0.659641	0.73765	-0.128249	0.995219	0.673182	0.0882778	-0.114708	0.876891	18.1542	19.8572	12.8028	23.4204	23.9711	34.6339	26.3687	18.328	18.3316	18.7604	12.5275	20.0768	ENSMUSG00000102723	downstream	48417	NA
chr1	125988259	125988498	240	-0.613684	0.887536	-0.671377	0.959641	0.964266	0.12076	0.906573	0.209762	29.687	19.4276	23.9573	8.10553	13.806	22.025	20.8679	13.2095	12.5545	6.76059	10.1797	6.80937	ENSMUSG00000102723	downstream	9379	NA
chr1	126123234	126123415	182	0.822476	NA	1.98479	0.439318	-0.395283	0.658798	0.767026	0.522229	13.0492	8.53961	9.87253	23.5149	26.2972	15.4901	6.55194	10.2465	2.36506	19.4034	16.3419	39.5093	ENSMUSG00000102723	upstream	124036	NA
chr1	126183583	126183699	117	-0.0951133	NA	-0.898398	0.958744	-0.611315	0.580061	-1.4146	0.181706	6.76626	10.6271	9.21436	6.65069	9.44001	15.0598	4.07676	22.3147	25.7529	10.6048	9.07886	22.3487	ENSMUSG00000103824	downstream	67673	NA
chr1	126332030	126332374	345	0.0108686	0.998874	-0.672029	0.819437	0.412821	0.364981	-0.270077	0.655813	17.5923	30.6337	29.1655	19.7352	27.7454	30.6435	28.3424	32.4326	30.7755	14.6624	21.8603	24.6322	ENSMUSG00000103824	upstream	79619	NA
chr1	126484705	126485083	379	0.126798	0.98981	-0.380108	0.978743	-1.01	0.022015	-1.51691	0.00218647	15.3178	17.2234	8.53362	22.5843	15.5424	6.50871	13.2145	40.8402	37.479	25.9385	24.3836	42.2576	ENSMUSG00000103824	upstream	232294	NA
chr1	126533984	126534354	371	0.393047	0.928126	0.481518	0.974375	1.32496	0.00202128	1.41343	0.0116962	24.8947	17.1759	22.7627	18.8765	24.3125	48.4432	23.7848	7.53991	8.50826	9.51864	11.1663	14.096	ENSMUSG00000049690	inside	224182	Nckap5
chr1	126556599	126557087	489	0.21686	0.971884	0.245782	0.989573	-0.0858881	0.892084	-0.0569654	0.947216	14.0307	16.8452	10.6559	12.7301	23.3394	15.8544	12.1928	16.3987	12.6169	15.2241	15.4229	22.0574	ENSMUSG00000049690	inside	201449	Nckap5
chr1	126597467	126597687	221	-0.171258	0.979184	0.0310969	0.997773	-0.167114	0.777233	0.0352413	0.967196	42.9857	33.7566	29.2691	29.9281	38.3153	38.2697	18.3454	34.5972	33.76	38.8684	38.9323	23.6633	ENSMUSG00000049690	inside	160849	Nckap5
chr1	126656296	126656590	295	-0.403766	0.920262	-0.420757	0.974375	0.31654	0.565947	0.299549	0.65606	36.6754	23.7083	32.8906	19.1235	32.448	11.9458	27.4871	25.2864	24.8051	17.471	17.6438	22.1593	ENSMUSG00000049690	inside	101946	Nckap5
chr1	126660362	126660749	388	0.286255	0.969914	-0.0063057	0.999855	-0.515055	0.362469	-0.807616	0.211115	10.8818	10.4148	6.02021	8.52334	9.01423	19.0732	9.22	17.3029	14.422	16.2353	15.0573	16.0055	ENSMUSG00000049690	inside	97787	Nckap5
chr1	126737984	126738472	489	0.0506609	0.994031	-0.229527	0.987259	0.448963	0.270935	0.168775	0.787591	23.7442	26.0624	19.4745	21.8799	18.4457	36.0327	21.4593	18.6869	22.2996	16.2	20.8535	14.7049	ENSMUSG00000049690	inside	20064	Nckap5
chr1	126755464	126756015	552	-0.0854105	0.990387	-0.276401	0.983547	0.29523	0.528181	0.10424	0.883139	27.2489	29.0007	30.5977	19.3828	18.3413	38.9428	34.5639	23.6487	30.1516	17.8092	18.2811	33.1587	ENSMUSG00000049690	inside	2521	Nckap5
chr1	126799018	126799611	594	-0.161239	0.970882	-0.485855	0.895469	0.907563	0.00330039	0.582946	0.151642	39.5382	29.305	35.3915	24.2347	25.4117	38.5623	36.9379	18.8371	27.0535	19.1209	14.1272	15.9573	ENSMUSG00000101600	downstream	329	NA
chr1	126801667	126802072	406	-0.236524	0.95513	-0.443529	0.949525	1.05438	0.00131299	0.847377	0.0384645	54.5967	50.531	80.1037	45.0396	39.4457	47.7389	78.1262	28.4783	39.9341	24.4486	29.8261	20.1262	ENSMUSG00000101600	inside	1727	NA
chr1	126806526	126807506	981	-0.105647	0.974768	0.229576	0.974375	0.043771	0.901111	0.378994	0.207621	49.7641	36.9145	52.2006	41.0482	42.9708	44.1847	43.5166	33.2673	37.5886	34.1496	42.8789	49.3107	ENSMUSG00000101600	upstream	2174	NA
chr1	126817142	126818312	1171	-0.0148531	0.995667	0.0734326	0.995158	-0.507515	0.00776154	-0.41923	0.0888272	59.7176	74.0605	82.2447	66.9485	75.2984	60.4889	82.484	91.0937	101.943	103.513	112.391	87.6438	ENSMUSG00000101600	upstream	12790	NA
chr1	126830160	126831062	903	0.387101	0.758252	0.220405	0.974375	-0.0866269	0.79263	-0.253323	0.463609	21.6251	25.129	25.4696	31.8835	30.7819	37.4645	27.2033	27.0541	30.5074	32.343	36.4662	31.4905	ENSMUSG00000101600	upstream	25808	NA
chr1	126915193	126915579	387	0.00848574	0.998874	-0.189069	0.986975	-0.539244	0.0798032	-0.736798	0.0363324	42.9579	46.5861	40.8575	41.2188	45.1876	25.4967	61.0092	70.8362	74.15	74.4805	59.0126	55.7418	ENSMUSG00000101385	downstream	62142	Gm5261
chr1	126917833	126918173	341	0.132533	0.983297	0.361737	0.97349	-0.63972	0.0695406	-0.410516	0.414704	18.5725	21.8774	23.1845	25.101	24.8319	24.8024	18.8834	24.0629	32.3988	38.3454	33.9539	37.3817	ENSMUSG00000101385	downstream	59548	Gm5261
chr1	126925244	126925930	687	-0.0974081	0.975733	0.323983	0.884862	-0.446295	0.0356092	-0.0249048	0.954677	53.7755	50.4496	63.2934	50.9692	51.9819	43.0882	61.7923	52.6616	60.7755	73.7708	69.4235	69.9373	ENSMUSG00000101385	downstream	51791	Gm5261
chr1	127204459	127205861	1403	-0.107186	0.970368	-0.0703885	0.995219	-0.130739	0.61368	-0.0939409	0.786702	35.3601	35.2273	39.0609	28.4242	31.6203	40.4394	36.377	41.3382	36.816	38.0278	34.9028	38.9052	ENSMUSG00000099471	downstream	4538	Gm8451
chr1	127206054	127206452	399	-0.160297	0.975872	-0.298601	0.978771	0.052299	0.927923	-0.0860046	0.899814	35.0523	37.784	26.5692	20.4771	26.7585	28.2627	43.6336	41.13	29.4872	28.9441	24.4924	33.5861	ENSMUSG00000099471	downstream	3947	Gm8451
chr1	127348065	127349046	982	-0.000352138	0.999671	0.0314935	0.996879	-1.65737	1.67269e-09	-1.62552	7.70147e-07	26.066	24.5318	11.3444	21.5927	22.682	16.1487	21.129	65.7073	61.0741	78.9208	69.2286	44.6007	ENSMUSG00000103390	downstream	13010	NA
chr1	127380819	127381198	380	-0.339393	0.979462	-0.505875	0.989573	0.302705	0.80719	0.136222	0.936618	29.1661	18.4051	25.5335	6.65506	10.6573	25.039	35.146	25.0285	19.2566	7.03269	9.50413	31.8249	ENSMUSG00000103390	downstream	45764	NA
chr1	127424956	127425547	592	-0.700174	0.652163	-0.613365	0.801389	-1.19843	0.0002249	-1.11162	0.00362454	28.0823	41.4806	24.5846	15.4443	30.1618	12.5007	18.1285	76.863	59.6218	53.2034	45.2164	33.6788	ENSMUSG00000103390	downstream	89901	NA
chr1	127445151	127445439	289	0.259589	0.964131	-0.270509	0.980153	-0.876025	0.01527	-1.40612	0.000530449	17.3488	23.6627	16.7867	25.5787	28.026	23.1682	15.6793	48.3963	54.6118	35.6675	45.5765	48.6316	ENSMUSG00000103390	downstream	110096	NA
chr1	127773658	127774840	1183	0.338904	0.790359	0.085686	0.995158	0.448264	0.04125	0.195047	0.566583	59.558	72.1269	102.522	85.6733	97.7196	97.7069	115.113	72.1988	64.6449	74.5477	75.6937	66.8619	ENSMUSG00000051590	inside	7928	Map3k19
chr1	127827484	127827593	110	-0.109661	NA	-1.21522	0.836856	1.11258	0.162961	0.00702084	0.995925	33.5853	18.3679	17.968	22.9902	25.1018	25.6291	10.8405	20.3441	24.7829	7.80902	10.6223	11.8855	ENSMUSG00000036104	inside	30974	Rab3gap1
chr1	127868522	127869333	812	0.0353821	0.993333	-0.261263	0.959474	-0.0996156	0.756981	-0.396261	0.181491	35.7479	42.8747	57.3117	40.9668	48.7404	51.2109	46.4058	65.6839	54.4235	47.9569	50.2334	52.3282	ENSMUSG00000099760	upstream	17920	NA
chr1	128004259	128004868	610	-0.0619333	0.995001	-0.501631	0.973622	-0.197836	0.773558	-0.637534	0.339324	24.2254	17.8352	6.18571	7.33484	23.2363	13.2872	16.8116	25.9859	23.5213	17.5241	14.105	21.4328	ENSMUSG00000102782	downstream	7329	NA
chr1	128016241	128016406	166	-0.581581	NA	-1.49001	0.637998	0.017597	0.988258	-0.890828	0.321797	14.307	12.1715	23.813	2.34377	14.4159	14.8603	14.3669	39.3196	23.3371	12.0742	10.8782	9.84488	ENSMUSG00000102782	inside	662	NA
chr1	128102370	128103829	1460	-0.0481517	0.98993	-0.133965	0.984078	-0.145173	0.547999	-0.230987	0.403892	115.675	113.904	119.253	85.4078	123.308	118.03	123.492	149.062	124.022	128.98	137.653	105.219	ENSMUSG00000103497	downstream	10104	NA
chr1	128243793	128245165	1373	0.281326	0.774115	0.0324345	0.996879	0.0420188	0.874542	-0.206873	0.416637	36.9015	42.6757	39.5218	44.4889	47.1932	53.6429	48.9835	43.1922	48.5931	47.7566	47.2702	45.7066	ENSMUSG00000026354	inside	10890	Lct
chr1	128359291	128360122	832	0.0701688	0.98866	0.116735	0.990887	-0.146942	0.642065	-0.100376	0.816996	42.5006	43.3385	50.1031	31.7986	56.4188	55.9097	47.2968	50.4322	46.907	54.8342	52.3453	50.6775	ENSMUSG00000026356	upstream	14186	Dars
chr1	128399133	128399352	220	-0.734784	0.822094	-0.307193	0.990735	0.942588	0.112967	1.37018	0.0336359	32.3858	26.8454	42.4698	9.72663	18.408	32.0364	23.8491	11.0197	15.0002	10.412	8.20811	14.8568	ENSMUSG00000088196	upstream	18425	Gm23902
chr1	128416719	128417658	940	0.255406	0.90908	-0.0357275	0.996879	0.0985688	0.782519	-0.192565	0.630216	38.179	41.666	58.4916	38.0787	58.9448	59.983	64.4432	55.5494	50.2181	51.6817	55.7104	46.5935	ENSMUSG00000088196	upstream	119	Gm23902
chr1	128592134	128593584	1451	0.15836	0.938394	-0.0539397	0.99616	-0.308114	0.117251	-0.520414	0.0169167	31.6443	28.4921	33.0631	30.1653	37.0444	33.0299	38.1322	46.6539	42.4211	43.7422	42.7526	41.8981	ENSMUSG00000045382	upstream	72104	Cxcr4
chr1	128643032	128643832	801	0.313388	0.931075	-0.249424	0.983547	-0.236421	0.595971	-0.799233	0.0597414	21.0844	27.7468	9.64574	23.5576	32.8632	20.2377	19.6509	34.4571	33.4966	27.8824	28.2465	29.7878	ENSMUSG00000099403	upstream	34831	NA
chr1	128649583	128649757	175	0.39753	0.943006	-0.806708	0.861196	0.719957	0.196215	-0.48428	0.515057	19.6028	16.8743	23.6151	22.2323	28.4009	26.1783	28.6189	24.5097	31.1557	18.5433	13.9607	14.9417	ENSMUSG00000099403	upstream	28906	NA
chr1	128659746	128660699	954	0.134097	0.976471	-0.20058	0.986975	0.557077	0.0774331	0.2224	0.650465	37.6187	29.4876	31.0767	25.0812	30.1011	41.3719	47.4981	34.0134	22.1086	25.7117	18.7059	29.4645	ENSMUSG00000099403	upstream	17964	NA
chr1	128707630	128708067	438	-0.295669	0.963353	-0.924531	0.611351	-0.754095	0.0979075	-1.38296	0.0029107	9.03713	20.9357	12.7171	7.99449	11.7677	9.6548	17.9685	39.5966	36.3614	17.8684	18.6738	24.6257	ENSMUSG00000097283	upstream	5472	NA
chr1	128722018	128722648	631	0.129739	0.976751	-0.0868971	0.995624	-0.880093	0.00101243	-1.09673	0.000506762	33.456	34.9759	24.2041	20.039	40.2584	37.9766	37.4177	71.8168	60.2571	55.3603	66.1577	65.2664	ENSMUSG00000097283	upstream	19860	NA
chr1	128740706	128740867	162	0.621339	0.920262	-0.955181	0.885567	0.492598	0.541383	-1.08392	0.191755	9.77349	10.5533	24.401	12.0082	34.0889	19.5778	26.499	26.4766	37.1986	24.7446	12.4582	10.088	ENSMUSG00000097283	upstream	38548	NA
chr1	128803074	128803945	872	-0.196907	0.931075	-0.00714377	0.999855	0.312714	0.205318	0.502477	0.0670758	62.037	57.0352	43.0655	39.4865	52.3531	47.2831	48.9562	38.9228	37.1864	41.0451	36.9099	34.859	ENSMUSG00000064737	downstream	9701	Gm23056
chr1	128824252	128824479	228	-0.159966	0.984078	-0.131667	0.995766	-0.429938	0.416801	-0.40164	0.544753	25.4625	27.9485	20.4898	17.9175	29.0653	17.0018	23.0123	38.4425	27.0599	36.8379	24.2262	27.2375	ENSMUSG00000064737	upstream	10496	Gm23056
chr1	128832261	128832860	600	0.247351	0.943708	-0.148651	0.990887	0.215789	0.591826	-0.180213	0.73458	21.1107	23.3131	24.8557	25.9377	32.8276	31.1287	20.2717	27.9731	24.6308	19.725	21.0675	32.685	ENSMUSG00000064737	upstream	18505	Gm23056
chr1	128962785	128962994	210	-0.768424	NA	-1.01603	0.93272	-1.1075	0.22207	-1.35511	0.16027	20.1055	8.1411	1.71124	4.63173	7.88915	5.03429	4.54268	31.9692	17.081	14.5438	8.09315	14.0079	ENSMUSG00000064737	upstream	149029	Gm23056
chr1	129250765	129251575	811	0.368535	0.893435	0.0327824	0.996879	0.618347	0.0743613	0.282594	0.597006	15.2929	10.5403	21.4907	24.4665	19.5202	19.9882	17.0561	12.1872	13.6227	14.3577	12.3119	12.8967	ENSMUSG00000103742	downstream	37435	NA
chr1	129818325	129818481	157	-0.322633	0.970331	-0.279238	0.993049	0.899884	0.190706	0.94328	0.254402	38.6582	20.7888	30.9004	16.1078	23.4497	22.4459	33.4191	21.3807	10.0528	15.8059	14.8847	4.16369	ENSMUSG00000103803	downstream	27543	NA
chr1	129833977	129834435	459	-0.508908	0.876129	-0.354396	0.978771	-0.258076	0.65047	-0.103564	0.898407	19.547	29.4589	20.3559	8.47637	16.8439	16.1229	24.4206	26.0026	24.0697	13.7239	19.208	27.7716	ENSMUSG00000103281	upstream	36464	NA
chr1	129837659	129838242	584	-0.349727	0.901237	-0.085784	0.99616	-0.915296	0.00237096	-0.651353	0.0890041	19.4298	25.5487	19.0756	15.6559	23.01	13.8788	13.8847	33.8487	33.6589	27.6198	35.1044	33.0208	ENSMUSG00000103281	upstream	32657	NA
chr1	129887748	129888582	835	0.224878	0.963107	0.510556	0.872283	-0.873174	0.00522104	-0.587497	0.174321	17.0656	14.8906	14.8478	12.1146	25.1319	19.4137	15.9946	29.2573	17.6988	27.4329	37.1461	35.6208	ENSMUSG00000103281	downstream	13978	NA
chr1	130387219	130387693	475	-0.350345	0.94191	-0.31519	0.978918	-1.56372	5.32551e-05	-1.52856	0.000675289	18.8886	16.3601	7.94375	10.6481	15.5015	4.45137	12.5521	42.0087	40.1745	33.7569	39.1346	24.7718	ENSMUSG00000085526	upstream	2620	NA
chr1	130428752	130428916	165	-0.229245	0.985118	0.193517	0.995219	-1.30573	0.0440967	-0.882966	0.308956	7.99649	24.4906	11.9787	17.6848	14.5033	8.54304	10.1178	35.037	21.7394	31.2361	46.3517	15.8473	ENSMUSG00000103751	downstream	25702	NA
chr1	130462338	130463230	893	0.0658401	0.985782	-0.107153	0.990735	0.169082	0.514212	-0.00391192	0.993058	53.7815	60.5672	61.5701	56.2031	71.3233	61.9561	56.3511	64.738	53.3431	63.8072	51.0297	47.9477	ENSMUSG00000064395	downstream	60077	Gm23623
chr1	130485344	130486766	1423	-0.112788	0.978789	0.793906	0.559788	1.74228	6.27426e-12	2.64898	3.35558e-16	24.4784	23.0456	23.3597	22.9666	17.0756	26.2505	21.62	3.80051	3.73069	6.30478	5.07599	9.18763	ENSMUSG00000064395	downstream	36541	Gm23623
chr1	130511737	130513369	1633	0.0129306	0.997305	-0.111773	0.990735	-0.256499	0.276217	-0.381203	0.155909	37.8132	37.6893	27.0675	31.8066	39.6792	33.0173	33.0061	49.7908	39.2747	38.9256	41.2401	43.6334	ENSMUSG00000064395	downstream	9938	Gm23623
chr1	130588593	130589045	453	-0.0315532	0.995667	-0.617787	0.715956	1.37136	2.18841e-07	0.78513	0.0183386	55.9225	42.5435	53.1504	39.5077	52.0138	55.2327	51.0675	27.1703	31.0399	20.2265	15.7106	22.3672	ENSMUSG00000026405	inside	324	C4bp
chr1	130715213	130717831	2619	0.140846	0.93832	0.142666	0.978771	0.0865019	0.706348	0.0883216	0.763308	37.4818	33.4698	40.958	36.9159	38.2358	44.5378	45.1666	35.4603	34.6785	36.9165	40.3151	38.9374	ENSMUSG00000026415	upstream	10808	Fcamr
chr1	130740984	130741492	509	-0.0904711	0.98981	-0.394275	0.956728	-0.159632	0.741753	-0.463437	0.324579	15.5531	23.817	18.0033	18.3449	17.7209	14.5391	21.5532	24.1811	29.0343	24.0015	18.1559	17.98	ENSMUSG00000086706	inside	3270	NA
chr1	130767041	130767337	297	0.15963	0.98981	0.324898	0.989573	-0.428292	0.555943	-0.263025	0.798728	17.77	19.3622	4.23488	9.16989	13.0158	11.8653	27.302	14.4418	18.3577	22.4951	21.1015	17.6081	ENSMUSG00000026417	inside	12620	Pigr
chr1	130874930	130875393	464	-0.0290282	0.995667	9.56093e-05	0.999977	-0.407453	0.289783	-0.378329	0.440803	20.4738	24.452	13.9407	17.6086	19.8362	19.7466	20.0455	24.1147	26.9025	25.7122	26.5557	23.9502	ENSMUSG00000016524	upstream	7078	Il19
chr1	130963762	130964282	521	0.0355813	0.995667	0.166613	0.993866	-0.524949	0.256563	-0.393917	0.530739	13.1689	13.4241	9.31163	11.9483	16.6061	6.76392	12.3594	18.6129	12.9435	15.7546	19.9805	16.9385	ENSMUSG00000016529	downstream	11051	Il10
chr1	131015430	131015691	262	0.138892	0.98981	-0.198663	0.993929	-0.734357	0.18353	-1.07191	0.0867149	20.1438	20.1691	8.22962	9.65238	27.4012	14.7954	18.2054	34.1656	33.4057	36.4289	30.8127	18.7128	ENSMUSG00000102856	inside	1441	NA
chr1	131030193	131030537	345	0.35717	0.962174	0.00938279	0.999855	-0.873426	0.0900773	-1.22121	0.0420999	12.2381	9.46041	7.29136	18.0436	7.46992	16.3432	7.60405	23.2433	21.2101	19.642	18.1656	31.2639	ENSMUSG00000016528	upstream	4630	Mapkapk2
chr1	131060508	131060952	445	0.196096	0.978789	0.103935	0.996879	-0.322226	0.577668	-0.414386	0.554849	20.7549	22.0034	10.4982	26.6663	19.4422	7.1272	26.2608	19.2773	27.7288	21.2335	21.9606	34.5212	ENSMUSG00000016526	inside	5125	Dyrk3
chr1	131075388	131075850	463	-0.0974584	0.988344	0.244633	0.983547	0.277775	0.496025	0.619866	0.149062	46.1655	57.7374	35.7032	41.5955	59.2396	45.6674	27.3002	23.764	36.5673	36.4871	36.4782	34.591	ENSMUSG00000026427	upstream	5068	Eif2d
chr1	131083772	131084454	683	0.00900083	0.998874	-0.114518	0.995158	-0.61165	0.0651187	-0.735169	0.0612074	25.1134	33.9059	17.0999	34.7481	28.2993	21.6703	16.7607	42.3214	42.4348	43.3199	38.1033	35.4127	ENSMUSG00000026427	inside	2854	Eif2d
chr1	131087030	131087139	110	-0.506479	0.890181	-0.196421	0.993049	-0.216685	0.731391	0.0933727	0.915341	62.3726	87.6009	66.9716	51.2859	53.5506	44.8509	54.2024	42.3835	92.6099	51.1925	81.1154	41.5991	ENSMUSG00000026427	inside	6112	Eif2d
chr1	131089837	131089991	155	0.131332	0.983447	0.00461063	0.999855	0.64085	0.09433	0.514129	0.317342	68.0991	53.1439	52.1652	52.7121	73.632	59.1123	64.6233	44.5163	36.1015	39.409	42.489	37.9568	ENSMUSG00000026427	inside	8919	Eif2d
chr1	131096424	131098031	1608	0.00444664	0.999119	0.207311	0.973622	-0.102083	0.702975	0.100781	0.769305	36.1036	36.9221	37.5451	45.7297	30.3366	35.7222	36.0406	33.8646	34.8885	42.4392	38.182	38.2138	ENSMUSG00000026427	inside	15506	Eif2d
chr1	131110635	131111741	1107	0.0760122	0.990025	0.156561	0.990735	-0.709243	0.0147652	-0.628695	0.0905705	12.3956	26.5353	14.1212	19.6817	18.1253	15.9169	21.5439	25.2693	30.0699	27.9347	32.241	32.7736	ENSMUSG00000026427	inside	3654	Eif2d
chr1	131112580	131113116	537	0.361265	0.92407	0.328026	0.978771	-0.353367	0.427679	-0.386606	0.497723	16.7078	17.076	11.0418	23.909	11.3122	20.9996	20.8735	16.322	22.4438	20.9727	24.7259	28.607	ENSMUSG00000101729	upstream	31498	NA
chr1	131137933	131138659	727	0.167901	0.963798	0.343515	0.937132	0.0915581	0.803085	0.267172	0.487089	27.9492	31.4262	33.8599	38.7995	36.7147	34.416	29.8523	21.5474	29.9986	34.659	35.2127	27.4248	ENSMUSG00000101729	upstream	5955	NA
chr1	131153085	131153576	492	-0.181082	0.97077	0.28928	0.978771	-0.169878	0.714308	0.300484	0.569035	18.2359	32.5373	27.025	18.188	25.442	23.6366	25.6911	20.4681	22.1636	28.9047	28.2828	19.2655	ENSMUSG00000101729	downstream	7259	NA
chr1	131184011	131185042	1032	-0.208791	0.934032	-0.0624653	0.996739	-0.282347	0.302612	-0.136022	0.733157	24.8031	24.8493	22.1118	20.3581	21.2263	23.2202	18.2566	24.0337	28.3624	24.3233	28.2025	22.1701	ENSMUSG00000102027	upstream	2202	NA
chr1	131238692	131239569	878	-0.0606009	0.985118	-0.0158013	0.997019	-0.044125	0.874685	0.00067459	0.998524	73.034	81.7819	74.2868	74.6668	72.3322	64.6201	80.9456	67.7556	84.8135	78.7029	71.0167	77.4314	ENSMUSG00000102733	downstream	29471	NA
chr1	131244918	131245700	783	0.27085	0.894822	0.241047	0.974375	-0.11705	0.724156	-0.146853	0.722528	21.9061	24.4148	27.0782	34.2854	27.9764	24.7535	30.7632	26.9132	27.4866	33.643	30.6594	32.1423	ENSMUSG00000102733	downstream	23340	NA
chr1	131253628	131253871	244	-0.311219	0.967337	-0.186939	0.994715	-0.877437	0.0943165	-0.753156	0.250285	25.9558	28.6637	10.3095	14.3508	28.6682	14.4426	10.7516	34.3931	38.2222	35.2046	32.6504	26.791	ENSMUSG00000102733	downstream	15169	NA
chr1	131257286	131257509	224	-0.0886187	0.991343	0.140015	0.995219	0.0184932	0.980566	0.247127	0.744867	21.205	26.3661	23.2621	25.185	22.1882	18.8786	22.3585	21.6458	18.5756	24.287	22.762	17.5098	ENSMUSG00000102733	downstream	11531	NA
chr1	131260015	131260171	157	-0.437091	0.943006	0.85081	0.956728	1.40478	0.020816	2.69268	0.000385339	58.8277	19.7988	43.4894	30.9765	19.9322	40.4026	28.8619	5.93908	6.39721	12.1584	8.11893	14.5729	ENSMUSG00000102733	downstream	8869	NA
chr1	131277017	131277174	158	-0.358669	0.950927	-0.571324	0.958744	0.517463	0.379963	0.304807	0.698321	40.0837	48.2002	39.8025	25.8556	26.7965	35.6861	46.7925	21.2454	47.2213	23.5589	18.152	31.0301	ENSMUSG00000102733	upstream	6596	NA
chr1	131347232	131347373	142	-0.193305	NA	-0.570222	0.978743	0.67841	0.36836	0.301493	0.776288	29.7334	22.9848	13.9189	19.1793	14.2597	22.3352	21.8336	18.3861	17.1772	10.7542	13.4648	11.5088	ENSMUSG00000101778	upstream	10281	NA
chr1	131362893	131363083	191	0.0281469	0.998774	1.56602	0.749851	1.19252	0.0655984	2.7304	0.00147526	23.4871	17.9019	34.8071	44.8138	22.1667	25.8304	9.98914	3.90549	3.75603	9.49439	11.6789	13.69	ENSMUSG00000099959	downstream	12095	NA
chr1	131431579	131432189	611	-0.296583	0.925644	0.111297	0.995158	-0.444888	0.197459	-0.0370073	0.953893	21.5945	26.9634	21.7616	18.7847	19.8843	22.4936	16.0035	22.8912	25.3615	19.8385	31.9885	26.7471	ENSMUSG00000026425	inside	22901	Srgap2
chr1	131455338	131455908	571	0.335544	0.91025	0.577202	0.801389	-0.523154	0.117844	-0.281496	0.584067	15.2508	13.6095	14.4751	15.3309	19.6653	16.0462	21.3013	16.0033	18.8459	28.7501	25.3	23.4691	ENSMUSG00000055184	overlapStart	267	Fam72a
chr1	131511813	131512028	216	-0.557612	0.880346	-0.443613	0.974375	-0.304358	0.62384	-0.190359	0.814496	45.2024	23.7449	32.4422	27.919	20.4533	11.4204	28.7072	31.0812	44.5054	36.2332	22.1297	24.2111	ENSMUSG00000026432	upstream	14949	Avpr1b
chr1	131526519	131528339	1821	0.0359101	0.991241	0.00046528	0.99991	0.05706	0.819029	0.0216151	0.951194	92.0189	103.529	98.4737	99.5631	99.9754	99.0823	103.595	103.638	89.7441	110.276	100.681	77.3599	ENSMUSG00000026432	overlapStart	458	Avpr1b
chr1	131541486	131541804	319	0.184261	0.98248	0.367587	0.984849	0.673011	0.232774	0.856338	0.222944	17.3717	16.5652	16.8978	12.8062	27.1215	18.78	17.9429	5.26139	13.0437	8.97589	12.3205	16.3937	ENSMUSG00000026432	downstream	1748	Avpr1b
chr1	131552092	131552612	521	-0.0498036	0.993015	0.289183	0.980462	1.3406	1.4748e-05	1.67959	9.70394e-06	39.0002	25.9532	33.4529	35.098	33.2121	23.6737	32.5006	10.7382	9.63879	13.5563	9.99023	14.4291	ENSMUSG00000095841	downstream	7635	NA
chr1	131555279	131555470	192	0.310421	0.966557	-0.11258	0.996879	0.883082	0.0974576	0.460081	0.560488	13.744	50.9975	28.075	50.6595	32.5975	47.7209	27.3271	26.2248	20.1769	22.3696	22.1297	18.7258	ENSMUSG00000095841	downstream	4777	NA
chr1	131658067	131658359	293	0.215448	0.967143	0.103016	0.99616	0.045093	0.935621	-0.0673394	0.923875	21.6151	34.4791	30.6621	27.2213	37.6956	36.0819	35.8143	28.0049	33.2992	32.5746	35.5284	30.1193	ENSMUSG00000042268	upstream	13401	Slc26a9
chr1	131688390	131688757	368	-0.262986	0.941184	-0.186145	0.989596	0.145269	0.758905	0.22211	0.680682	55.2149	51.1031	43.9435	61.8487	39.017	26.8131	36.2921	34.9664	50.296	40.2004	38.6789	32.8626	ENSMUSG00000042268	inside	10485	Slc26a9
[truncated: 40,756 more rows]
